# Supplementary material for: A Mesenchymal-like Program of Dormancy controlled by ZFP281 Serves as a Barrier To Metastatic Progression of Early Disseminated Cancer Cells
Source: Research Square preprint supplement (doi:10.21203/rs.3.rs-145308/v1), 2021-01-18
Supplement: Supplementary file 1 [file 4bdef06c1294f3d7cfa5b0ef.xlsx]

## Sheet: STable 1 (Fig1A)
Differentially expressed genes (DEGs) in MMTV-HER2 early lesion (EL) and primary tumor (PT) 7-day spheres RNAseq. Heatmap on Figure 1A.
UP (EL vs. PT)		p<0.05 + FC>2 : 2873 DEGs				DOWN (EL vs. PT)		p<0.05 + FC<0.5 : 1417 DEGs
Id	Symbol	FoldChange (Log2)	p-value	p-corrected		Id	Symbol	FoldChange (Log2)	p-value	p-corrected
NM_013805	Cldn5	9.01248	2.11059e-37	1.14723e-36		NM_030707	Fcrls	-6.19846	4.23699e-15	1.40231e-14
NM_001081416	Fndc1	8.78942	8.48002e-252	2.11916e-250		NM_001013780	Slc25a34	-5.74439	1.74322e-54	1.19446e-53
NM_027011	Krt5	8.37627	1.83236e-180	3.16114e-179		NM_001272041	Acta1	-5.37814	1.89597e-183	3.35234e-182
NM_016770	Folh1	8.31544	4.58017e-44	2.7203e-43		NM_007785	Csn1s2a	-5.34315	8.74664e-268	2.35819e-266
NM_024435	Nts	8.25385	3.20031e-23	1.33113e-22		NM_007419	Adrb1	-5.31515	2.05011e-145	2.90212e-144
NM_133222	Eltd1	8.22841	1.23878e-36	6.65774e-36		NM_001159419	Sidt1	-5.10186	2.5222e-91	2.49597e-90
NM_011613	Tnfsf11	8.21216	6.36423e-69	5.13908e-68		NM_153457	Rtn1	-5.04159	2.2333e-106	2.48545e-105
NM_009868	Cdh5	8.18969	5.72436e-262	1.49671e-260		NM_199021	Dpp10	-5.02725	3.86241e-07	9.04331e-07
NM_173385	Cilp	8.16005	0	0		NM_007592	Car8	-4.81232	8.35401e-216	1.78759e-214
NM_019967	Brinp1	8.12483	3.61e-55	2.49022e-54		NM_010701	Lect1	-4.77583	5.95078e-73	5.02045e-72
NM_008263	Hoxa10	8.11815	4.69443e-55	3.23103e-54		NM_001039554	Angptl7	-4.76695	1.7183e-17	6.13199e-17
NM_010462	Hoxc10	8.08528	3.7146e-126	4.70295e-125		NM_013468	Ankrd1	-4.75655	3.6775e-303	1.15318e-301
NM_009042	Reg1	8.03423	1.51386e-46	9.30876e-46		NM_010679	Lalba	-4.62753	5.02234e-127	6.39078e-126
NM_010456	Hoxa9	8.01694	1.46044e-40	8.30179e-40		NM_153509	AF529169	-4.62576	1.18553e-07	2.85966e-07
NM_026433	Tmem100	7.99334	9.1803e-28	4.24717e-27		NM_010154	Erbb4	-4.61622	1.36724e-14	4.45435e-14
NM_026730	Gpihbp1	7.95714	1.80386e-27	8.28722e-27		NM_009809	Casp14	-4.50659	2.21997e-63	1.68177e-62
NM_001159662	Ppp1r16b	7.95446	1.97836e-27	9.07085e-27		NM_177841	4932418E24Rik	-4.47945	3.2974e-15	1.09593e-14
NM_008343	Igfbp3	7.91374	4.52589e-305	1.42731e-303		NM_009996	Cyp24a1	-4.38192	6.97014e-57	4.89714e-56
NM_153145	Abca8a	7.91092	5.34582e-57	3.76451e-56		NM_009987	Cx3cr1	-4.28317	5.24107e-26	2.33838e-25
NM_010195	Lgr5	7.90187	6.8188e-64	5.1884e-63		NM_198410	Paqr6	-4.19336	6.31403e-80	5.67996e-79
NM_009236	Sox18	7.8233	2.11061e-38	1.16555e-37		NM_008108	Gdf3	-4.18605	4.37034e-10	1.18707e-09
NM_172648	Ifi205	7.77574	1.24658e-127	1.59356e-126		NM_001081386	Cdh19	-4.15471	2.48658e-290	7.37952e-289
NM_028783	Robo4	7.75721	1.56383e-43	9.23064e-43		NM_172913	Tox3	-4.15211	3.42543e-42	1.99258e-41
NM_001025379	Sema3g	7.75504	1.77149e-43	1.04474e-42		NM_010800	Bhlha15	-3.93161	2.42209e-46	1.48539e-45
NM_001111059	Cd34	7.74037	7.97138e-147	1.13714e-145		NM_001160096	Cldn10	-3.92922	2.56211e-12	7.6894e-12
NM_027426	Draxin	7.70758	7.21077e-77	6.29839e-76		NM_001167891	Nrg2	-3.89722	3.0828e-65	2.38235e-64
NM_001111331	Kcnip3	7.68285	1.14893e-36	6.17723e-36		NM_130888	Nxf7	-3.89486	3.50909e-19	1.31319e-18
NM_053199	Cadm3	7.62402	6.09505e-42	3.52551e-41		NM_016771	Sult1d1	-3.86154	2.81881e-07	6.65663e-07
NM_010809	Mmp3	7.58014	0	0		NR_027988	4930433N12Rik	-3.85964	3.76254e-06	8.27161e-06
NM_177879	Sdk1	7.51081	9.66444e-252	2.41297e-250		NM_028889	Efhd1	-3.82995	0	0
NM_011891	Sgcd	7.49371	1.9132e-50	1.24646e-49		NM_010692	Lbx2	-3.78707	2.88238e-26	1.29415e-25
NM_009930	Col3a1	7.48338	0	0		NM_145423	Slc5a8	-3.74166	0	0
NM_028977	Lrrc17	7.47841	3.16445e-114	3.70019e-113		NM_007418	Adra2c	-3.72619	1.38601e-112	1.60776e-111
NM_199468	Zcchc5	7.45945	9.47005e-50	6.11084e-49		NM_053248	Slc5a5	-3.68572	1.39573e-38	7.73085e-38
NM_011260	Reg3g	7.43928	7.36333e-18	2.65731e-17		NM_177577	Dcdc2a	-3.67104	1.14299e-40	6.50531e-40
NM_007603	Capn6	7.43572	3.45565e-33	1.76051e-32		NM_138595	Gldc	-3.66484	5.381e-15	1.77438e-14
NM_015748	Slit1	7.4059	5.32164e-204	1.06621e-202		NM_001039484	Kcnj10	-3.65563	4.84624e-11	1.37883e-10
NM_008816	Pecam1	7.39892	1.5133e-242	3.63415e-241		NM_021344	Tesc	-3.60229	3.63012e-41	2.07975e-40
NM_022814	Svep1	7.37147	0	0		NM_175319	Papl	-3.58069	1.28021e-158	1.96496e-157
NM_010180	Fbln1	7.36715	0	0		NM_001290291	Shisa7	-3.5616	4.5177e-15	1.49362e-14
NM_011836	Lamc3	7.3554	0	0		NM_197996	Tspan15	-3.55835	0	0
NM_019631	Tmem45a	7.35138	2.79653e-176	4.73307e-175		NM_030072	Plb1	-3.54678	1.5128e-13	4.75297e-13
NM_001014423	Abi3bp	7.34231	2.44871e-193	4.60614e-192		NM_013800	Barx2	-3.52489	9.59868e-162	1.49818e-160
NR_027651	Meg3	7.30585	5.62035e-84	5.21871e-83		NM_001205343	Papln	-3.5149	0	0
NM_153529	Nrn1	7.29324	6.49721e-22	2.6156e-21		NM_001081147	Oxtr	-3.51484	0	0
NM_001024720	Hmcn1	7.29082	0	0		NM_001291903	Adcy8	-3.46288	2.03944e-62	1.53243e-61
NM_025809	Clec14a	7.23387	1.78549e-56	1.25066e-55		NM_019810	Slc5a1	-3.45552	0	0
NM_007732	Col17a1	7.22152	1.37467e-112	1.59527e-111		NM_016685	Comp	-3.45352	4.24734e-28	1.98155e-27
NM_007833	Dcn	7.21502	0	0		NM_001276475	Scgb2b27	-3.44697	7.36602e-12	2.17532e-11
NM_133659	Erg	7.21461	1.46567e-36	7.86337e-36		NM_015789	Dkkl1	-3.44633	3.11717e-155	4.69339e-154
NM_021355	Fmod	7.20344	3.66257e-46	2.24216e-45		NM_016674	Cldn1	-3.42898	0	0
NM_026793	Myct1	7.2005	1.96259e-21	7.80891e-21		NM_145635	Adig	-3.42854	7.38168e-07	1.69859e-06
NM_022319	Clstn2	7.18615	4.53907e-174	7.58494e-173		NR_045911	Gm13031	-3.4272	7.45226e-62	5.5529e-61
NM_001039155	Triobp	7.1712	2.94174e-45	1.78236e-44		NM_001099632	Rnf39	-3.38512	5.92428e-99	6.25143e-98
NM_001172481	Aspn	7.15991	7.74177e-159	1.19024e-157		NM_008812	Padi2	-3.37583	0	0
NM_145379	Mrgprf	7.14621	1.89327e-148	2.73178e-147		NM_026335	Lce1h	-3.37061	1.82714e-07	4.35947e-07
NM_008607	Mmp13	7.14529	0	0		NM_023755	Tfcp2l1	-3.36473	0	0
NM_001098789	Ndufa4l2	7.12018	1.17486e-145	1.66568e-144		NR_034155	Olfr1372-ps1	-3.33732	3.02981e-43	1.78343e-42
NM_007855	Twist2	7.11267	3.50736e-272	9.63445e-271		NM_001285808	Dtna	-3.33168	2.64575e-99	2.80468e-98
NM_010461	Hoxb8	7.11182	1.71986e-35	9.03114e-35		NM_031368	Bglap3	-3.31829	7.6115e-258	1.95869e-256
NM_009933	Col6a1	7.08809	0	0		NM_001168657	Socs2	-3.28994	0	0
NM_016911	Srpx	7.07645	2.61777e-197	5.03707e-196		NM_175628	A2m	-3.27952	3.79152e-28	1.77157e-27
NR_028261	Rian	7.04479	2.85893e-154	4.28824e-153		NM_001291076	Snph	-3.27328	3.20967e-80	2.88922e-79
NM_146007	Col6a2	7.03946	0	0		NM_177898	Nek5	-3.24105	1.37155e-25	6.06079e-25
NM_054049	Osr2	7.03817	1.82619e-29	8.7272e-29		NM_001163639	Ttc18	-3.23683	4.45768e-07	1.03932e-06
NM_011537	Tbx5	7.03468	3.02223e-20	1.1612e-19		NM_170778	Dpyd	-3.21491	9.17297e-88	8.79773e-87
NM_009398	Tnfaip6	7.03434	4.36209e-175	7.3379e-174		NM_021542	Kcnk5	-3.19782	4.37984e-189	8.03667e-188
NM_001284507	Crabp1	7.033	0	0		NM_020279	Ccl28	-3.18277	7.97746e-198	1.54036e-196
NM_001166463	Spock1	6.96902	1.21552e-47	7.60256e-47		NM_033269	Chrm3	-3.16475	1.08976e-156	1.6552e-155
NM_031397	Bicc1	6.96731	0	0		NM_011852	Oas1g	-3.16247	1.36914e-30	6.68254e-30
NM_172530	She	6.96234	1.34838e-33	6.9101e-33		NM_175638	Wnk4	-3.16245	2.12357e-124	2.66423e-123
NM_001289729	Xpnpep2	6.96072	1.81385e-102	1.9634e-101		NM_172752	Sorbs2	-3.15953	0	0
NR_001592	H19	6.95872	0	0		NM_009160	Sftpd	-3.15144	0	0
NM_001163691	Cacna1h	6.95125	6.11163e-62	4.55764e-61		NM_021382	Tacr3	-3.14779	2.49686e-06	5.54682e-06
NM_009783	Cacna1g	6.94643	7.9377e-214	1.67905e-212		NM_027116	Nkpd1	-3.13987	3.53182e-22	1.43097e-21
NM_001163522	Emcn	6.94157	1.64927e-83	1.52476e-82		NM_001289462	Mme	-3.12406	0	0
NM_009675	Aoc3	6.93483	0	0		NM_001174053	Camk2b	-3.1204	2.55567e-11	7.36357e-11
NM_025658	Ms4a4d	6.92436	1.01099e-157	1.54148e-156		NM_001109043	Zfp185	-3.11258	2.32231e-182	4.07494e-181
NM_144783	Wt1	6.91456	3.0153e-65	2.33084e-64		NM_025778	Bcl2l14	-3.11194	2.39143e-209	4.94152e-208
NM_001162943	Dchs1	6.90444	0	0		NM_144848	Eppk1	-3.09614	3.98862e-202	7.89428e-201
NM_011412	Slit3	6.88928	0	0		NR_045338	5730420D15Rik	-3.09114	1.63058e-05	3.43967e-05
NM_001285956	Podn	6.88596	2.90938e-139	3.99197e-138		NM_001254724	1700023F06Rik	-3.08167	6.95928e-22	2.79715e-21
NR_045629	D630010B17Rik	6.8831	2.88538e-50	1.87719e-49		NM_007969	Wfdc18	-3.07806	0	0
NM_001243008	Col6a3	6.87001	0	0		NM_001122733	Kit	-3.07717	0	0
NM_015734	Col5a1	6.86181	0	0		NM_178740	Slitrk4	-3.07488	3.95512e-06	8.68602e-06
NM_011211	Ptprd	6.85525	4.40202e-72	3.68352e-71		NM_182929	Rims3	-3.05712	4.6324e-65	3.57487e-64
NM_001243837	C7	6.84664	3.57787e-32	1.79633e-31		NM_025413	Lce1g	-3.05533	1.61717e-07	3.8705e-07
NM_008002	Fgf10	6.8406	1.38633e-54	9.51092e-54		NM_009749	Bex2	-3.03551	1.6652e-14	5.41298e-14
NM_001081224	Prr16	6.83237	1.1631e-174	1.95183e-173		NR_045739	Sorbs2os	-3.02374	1.03067e-214	2.19693e-213
NM_001195431	Islr	6.82294	7.68174e-226	1.72366e-224		NM_001301334	Csn1s2b	-3.00728	6.37434e-06	1.38311e-05
NM_008546	Mfap2	6.81687	2.13664e-167	3.45166e-166		NM_172979	Muc15	-3.00646	0	0
NM_199223	Rtn4rl2	6.81437	2.27442e-63	1.72208e-62		NM_001033210	Pls1	-3.00639	4.28239e-33	2.17729e-32
NM_182807	Fam19a2	6.8006	3.74672e-17	1.32511e-16		NM_144883	Proser2	-3.00221	0	0
NM_153107	Cpz	6.7948	6.32929e-23	2.61414e-22		NM_001159299	Itih4	-2.99646	2.05885e-10	5.69052e-10
NM_153393	Col23a1	6.79011	0	0		NM_022020	Rbp7	-2.98421	2.56286e-40	1.45357e-39
NM_027519	Medag	6.78916	0	0		NM_010197	Fgf1	-2.97661	6.64663e-31	3.26715e-30
NM_153534	Adcy2	6.78599	1.09474e-44	6.56107e-44		NM_173749	Pamr1	-2.97355	4.33237e-285	1.26673e-283
NM_145741	Gdf10	6.78506	8.9026e-71	7.32335e-70		NM_206942	Ltk	-2.97314	6.97268e-157	1.05964e-155
NM_001145807	Brinp3	6.78467	1.12021e-87	1.07327e-86		NM_018873	Srcin1	-2.96308	1.12653e-145	1.59797e-144
NM_001033281	Prdm6	6.78042	1.53015e-31	7.60241e-31		NM_146017	Gabrp	-2.95762	0	0
NM_010406	Hc	6.77497	1.24342e-95	1.27467e-94		NM_001081172	Frmpd1	-2.9445	2.26982e-81	2.06469e-80
NM_001077398	Ldb2	6.77112	1.89588e-57	1.34224e-56		NM_011703	Vipr1	-2.9395	0	0
NM_016919	Col5a3	6.75592	0	0		NM_001039181	Npr3	-2.93066	4.34206e-105	4.78612e-104
NM_011441	Sox17	6.75513	1.22546e-22	5.02099e-22		NM_183173	Sowaha	-2.9269	7.8436e-15	2.5766e-14
NM_010216	Figf	6.75505	5.51352e-60	4.02701e-59		NM_173744	Tdrp	-2.92373	2.02452e-129	2.61582e-128
NM_007742	Col1a1	6.74044	0	0		NM_011375	St3gal5	-2.90523	0	0
NM_177566	Arhgef15	6.73225	1.84494e-39	1.03515e-38		NM_001002005	Panx2	-2.90371	9.33022e-07	2.1349e-06
NM_007825	Cyp7b1	6.73048	1.67397e-182	2.94289e-181		NM_011786	Aloxe3	-2.90244	1.30281e-07	3.13546e-07
NR_028121	Mgarp	6.72002	2.66668e-45	1.61783e-44		NM_008963	Ptgds	-2.90181	4.52865e-06	9.9204e-06
NM_011330	Ccl11	6.71741	0	0		NM_020049	Slc6a14	-2.90032	2.7039e-23	1.12651e-22
NM_001141922	Bean1	6.71526	1.22923e-47	7.68481e-47		NM_001033304	5330417C22Rik	-2.89073	5.73477e-37	3.10258e-36
NM_007876	Dpep1	6.7077	2.69175e-118	3.24333e-117		NM_011082	Pigr	-2.88295	0	0
NM_033325	Loxl2	6.69686	0	0		NM_009897	Ckmt1	-2.88292	0	0
NM_001101535	Ccdc8	6.69196	2.20418e-119	2.678e-118		NM_029529	Slc35d3	-2.88169	1.41445e-83	1.30985e-82
NM_001081342	Gpr133	6.68464	1.18913e-191	2.20682e-190		NM_023047	Dpysl5	-2.87385	1.80343e-186	3.24045e-185
NM_010291	Gjb5	6.6823	1.53365e-13	4.81684e-13		NM_001205349	Lipk	-2.87171	4.02599e-53	2.70835e-52
NM_010460	Hoxb7	6.67952	2.56937e-68	2.06212e-67		NM_008240	Foxj1	-2.86363	4.1292e-258	1.06555e-256
NM_001101488	Gsg1l	6.67568	9.99851e-47	6.17552e-46		NM_177195	Atp8b5	-2.85924	1.36432e-17	4.88703e-17
NM_080435	Adcy4	6.67176	1.86443e-84	1.73877e-83		NM_019578	Extl1	-2.85348	1.49445e-211	3.12301e-210
NM_010924	Nnmt	6.67043	2.52066e-80	2.27196e-79		NM_009777	C1qb	-2.84528	9.53088e-97	9.84336e-96
NM_007737	Col5a2	6.66613	0	0		NM_030017	Rdh12	-2.83574	8.25831e-54	5.59629e-53
NM_008471	Krt19	6.66236	1.06417e-246	2.60529e-245		NM_011271	Rnase1	-2.82965	2.40364e-20	9.26424e-20
NM_172907	Olfml1	6.66185	1.48162e-13	4.6587e-13		NM_023245	Palmd	-2.81512	0	0
NM_011582	Thbs4	6.65682	9.69776e-36	5.12641e-35		NM_007698	Chrm1	-2.81476	1.91367e-60	1.40216e-59
NM_008376	Gimap1	6.64543	1.28583e-17	4.61245e-17		NM_028060	Slc35f2	-2.81427	3.36024e-10	9.18386e-10
NM_011340	Serpinf1	6.63998	0	0		NM_001024728	C330021F23Rik	-2.80721	1.05724e-08	2.68914e-08
NM_007417	Adra2a	6.63761	8.27768e-290	2.44873e-288		NM_145389	BC016579	-2.80217	4.34036e-32	2.1756e-31
NM_019696	Cpxm1	6.63735	4.32967e-223	9.59073e-222		NM_172872	Kank4	-2.79725	0	0
NM_029844	Mrap	6.63434	1.2032e-21	4.8095e-21		NM_007574	C1qc	-2.79109	1.77748e-144	2.49957e-143
NM_007993	Fbn1	6.62926	0	0		NM_010663	Krt17	-2.78566	0	0
NM_009468	Dpysl3	6.62237	0	0		NM_026915	Lyzl4	-2.78107	4.15932e-20	1.58939e-19
NM_001290710	Ebf1	6.62197	0	0		NM_001034964	Sorbs1	-2.76139	0	0
NM_009313	Tacr1	6.61593	2.42341e-13	7.55055e-13		NM_001081314	C2cd4b	-2.7541	3.01879e-40	1.7118e-39
NM_008047	Fstl1	6.61586	0	0		NM_026862	Cd177	-2.75353	1.28117e-13	4.04035e-13
NM_025285	Stmn2	6.61376	2.54121e-13	7.91136e-13		NR_040596	4930455H04Rik	-2.74672	8.91743e-181	1.54418e-179
NM_016779	Dmp1	6.60142	0	0		NM_027442	Ddo	-2.74403	2.68683e-225	5.98999e-224
NM_172731	Fgd5	6.59922	1.84689e-57	1.30823e-56		NM_018780	Sfrp5	-2.74183	6.9837e-06	1.51225e-05
NM_008481	Lama2	6.59829	0	0		NM_026731	Ppp1r14a	-2.74049	2.34017e-16	8.05832e-16
NM_021361	Nova1	6.59554	4.52391e-46	2.76579e-45		NM_029953	Arhgef38	-2.72796	2.57597e-51	1.70067e-50
NM_175432	Tmem132c	6.59162	2.53811e-21	1.00641e-20		NM_022004	Fxyd6	-2.71492	0	0
NM_001097617	C1s1	6.58651	0	0		NM_173427	Klhdc7a	-2.71006	0	0
NM_007743	Col1a2	6.58236	0	0		NM_013601	Msx2	-2.69038	3.79423e-09	9.8827e-09
NM_015776	Mfap5	6.57907	0	0		NM_011983	Homer2	-2.68803	4.44926e-300	1.37957e-298
NM_001013024	Usp13	6.5672	6.52389e-57	4.58593e-56		NM_029077	Trim14	-2.68567	2.5762e-144	3.6191e-143
NM_023624	Lrat	6.56617	4.25606e-21	1.67896e-20		NM_177335	D930020B18Rik	-2.68232	0.000107748	0.000213821
NM_021342	Kcne4	6.56524	0	0		NM_009738	Bche	-2.66771	1.14968e-46	7.08826e-46
NM_010917	Nid1	6.56401	0	0		NR_035519	Mir2139	-2.66564	8.57478e-59	6.17978e-58
NM_013788	Peg12	6.56152	2.99611e-33	1.52779e-32		NM_025359	Tspan13	-2.64756	8.89476e-196	1.69386e-194
NM_008524	Lum	6.55842	0	0		NM_008748	Dusp8	-2.64737	0	0
NM_026555	Rcn3	6.55368	0	0		NM_030601	Clca2	-2.64323	0	0
NM_008713	Nos3	6.54826	4.57276e-101	4.89997e-100		NR_105975	Mir7008	-2.63827	2.88063e-05	5.96797e-05
NM_172484	Nckap5	6.53287	1.97452e-36	1.05729e-35		NM_010104	Edn1	-2.63789	3.06281e-126	3.87951e-125
NM_007811	Cyp26a1	6.53063	9.30833e-25	4.02653e-24		NM_010186	Fcgr1	-2.63385	2.14424e-20	8.2829e-20
NR_033474	2810433D01Rik	6.52135	1.03641e-16	3.61288e-16		NM_009115	S100b	-2.63111	8.00761e-40	4.51758e-39
NM_178680	Unc45b	6.52011	8.09997e-17	2.83253e-16		NM_021367	Tslp	-2.62755	1.82125e-12	5.50109e-12
NM_172298	Tshz3	6.51804	1.28045e-289	3.78382e-288		NM_016719	Grb14	-2.62111	6.52377e-76	5.6502e-75
NM_001290817	Sparc	6.51446	0	0		NM_177828	Arhgef37	-2.61658	2.68525e-63	2.03147e-62
NM_053191	Pi15	6.51042	0	0		NM_001033258	D10Bwg1379e	-2.61082	7.27124e-144	1.01735e-142
NM_007528	Bcl6b	6.51006	9.2244e-131	1.20365e-129		NM_001113368	Ceacam2	-2.61036	9.68612e-14	3.06268e-13
NM_146015	Efemp1	6.49864	1.87529e-28	8.80232e-28		NM_201255	Krt9	-2.60808	5.7212e-27	2.59738e-26
NM_001136058	Crmp1	6.48226	2.53137e-262	6.62487e-261		NM_001128103	Ano3	-2.579	2.47499e-153	3.69833e-152
NM_001204152	C1qtnf6	6.48099	0	0		NM_015773	Spag6	-2.56178	2.57365e-05	5.3528e-05
NM_144945	Lgi2	6.47876	3.12175e-124	3.90946e-123		NM_001004154	Rragb	-2.55836	8.20515e-11	2.3098e-10
NM_172870	Bnc2	6.47813	6.70026e-264	1.75852e-262		NR_037984	Gm19461	-2.55678	6.26295e-05	0.000126469
NM_133775	Il33	6.4725	1.72683e-67	1.37318e-66		NM_001085513	Fam131c	-2.55518	2.67451e-43	1.57462e-42
NM_173008	Ssc5d	6.46635	2.35538e-113	2.74141e-112		NR_045148	Slain1os	-2.55486	8.80671e-29	4.15841e-28
NM_001136077	Enpp2	6.45937	2.04995e-120	2.51156e-119		NR_015553	9430076C15Rik	-2.55286	3.08646e-10	8.46065e-10
NM_007532	Bcat1	6.45806	0	0		NM_001007460	Zdhhc23	-2.55266	7.36377e-18	2.65731e-17
NM_029568	Mfap4	6.45269	1.07916e-272	2.97916e-271		NM_198014	Slain1	-2.53861	1.47732e-201	2.9135e-200
NM_001145937	Tenm3	6.45193	0	0		NM_001271538	Myh14	-2.53854	0	0
NM_172294	Sulf1	6.44865	0	0		NM_139200	Cytip	-2.53331	0	0
NM_001167923	Col6a5	6.44699	2.67057e-16	9.18121e-16		NM_001277327	Sox6	-2.52916	8.98883e-93	9.02762e-92
NM_021423	Shank3	6.44339	5.00508e-78	4.43333e-77		NM_033373	Krt23	-2.52545	2.89455e-50	1.88271e-49
NM_145570	Eva1a	6.4378	5.20139e-66	4.05694e-65		NM_173769	Zfp641	-2.51924	1.02978e-42	6.03334e-42
NM_009152	Sema3a	6.43108	1.44074e-119	1.75198e-118		NM_001287172	Alpl	-2.51719	0	0
NM_001083935	Pth1r	6.42901	4.15357e-194	7.83435e-193		NM_018805	Hs3st3b1	-2.5168	2.25624e-169	3.68355e-168
NM_011707	Vtn	6.42651	1.96482e-12	5.92959e-12		NM_001146201	Pik3cg	-2.51632	6.38372e-131	8.34161e-130
NM_001252620	Spock3	6.42635	3.52414e-16	1.20678e-15		NM_009903	Cldn4	-2.51556	0	0
NM_001081243	Filip1	6.42634	7.16116e-24	3.02911e-23		NR_036590	1700001K23Rik	-2.50636	0.000246154	0.000473284
NM_001301353	Apod	6.4215	7.06884e-66	5.50264e-65		NM_053166	Trim7	-2.50306	2.97157e-184	5.2913e-183
NM_010743	Il1rl1	6.41451	0	0		NR_102387	Grip1	-2.50266	1.50152e-37	8.1874e-37
NM_001198811	Frem1	6.41328	0	0		NM_007572	C1qa	-2.49859	2.17776e-158	3.33887e-157
NM_010469	Hoxd4	6.41012	2.68042e-12	8.03837e-12		NM_144899	Adamtsl4	-2.49434	3.67147e-236	8.63716e-235
NM_001161537	Islr2	6.40385	8.55474e-39	4.75743e-38		NM_011436	Sorl1	-2.48983	1.60474e-221	3.52368e-220
NM_007934	Enpep	6.40156	1.71901e-114	2.01429e-113		NM_028808	P2ry13	-2.4866	1.53302e-08	3.86874e-08
NM_001039209	Gm13152	6.40098	4.81206e-16	1.6413e-15		NM_001171187	Mal	-2.47372	6.13181e-130	7.97482e-129
NM_001135172	C1qtnf7	6.3995	3.48973e-12	1.04191e-11		NM_019935	Ovol1	-2.47037	4.615e-63	3.48472e-62
NM_009866	Cdh11	6.3948	1.30289e-278	3.70008e-277		NM_027152	Cd164l2	-2.46342	2.23547e-77	1.96751e-76
NM_144853	Cyyr1	6.38738	3.13682e-12	9.38165e-12		NM_013891	Spdef	-2.46342	2.79726e-07	6.60696e-07
NM_020013	Fgf21	6.38563	1.76748e-109	2.00985e-108		NM_212457	Bex4	-2.46238	2.04351e-08	5.12526e-08
NM_030888	C1qtnf3	6.38532	8.58007e-116	1.01311e-114		NM_001163631	Satb1	-2.45935	7.48516e-188	1.36084e-186
NM_010728	Lox	6.38353	8.09409e-245	1.97113e-243		NM_173415	Nyx	-2.45489	6.54591e-07	1.51142e-06
NM_019413	Robo1	6.37795	0	0		NM_027468	Cpm	-2.45073	5.26963e-286	1.5473e-284
NM_009641	Angpt4	6.37649	3.12863e-220	6.82652e-219		NM_145523	Gca	-2.45068	1.32598e-250	3.2958e-249
NM_172781	Klhl4	6.36945	3.23795e-66	2.53694e-65		NM_011926	Ceacam1	-2.44802	0	0
NM_001162479	Stra6	6.3682	0	0		NM_001159743	Fam150b	-2.44742	1.23142e-26	5.56503e-26
NM_011581	Thbs2	6.36092	0	0		NM_153319	Amot	-2.44607	0	0
NM_001033633	Slc2a13	6.35532	2.42923e-115	2.85739e-114		NR_104376	1700024P16Rik	-2.44554	1.49518e-54	1.02526e-53
NM_007542	Bgn	6.35468	0	0		NM_007817	Cyp2f2	-2.44539	5.59868e-77	4.89646e-76
NM_010835	Msx1	6.34605	1.3407e-279	3.82312e-278		NM_146244	Rps6kl1	-2.44216	5.47824e-50	3.55239e-49
NM_028973	Lrrc15	6.33208	0	0		NM_001037999	Dbi	-2.4383	0	0
NM_175549	Robo2	6.33067	2.48404e-103	2.7047e-102		NM_001163154	Etv1	-2.43424	1.44732e-176	2.45407e-175
NM_023277	Jam3	6.3225	2.05995e-145	2.91456e-144		NM_130452	Bbox1	-2.43187	1.54422e-49	9.93446e-49
NM_031192	Ren1	6.32225	2.93633e-19	1.10138e-18		NM_153576	Cxcl17	-2.42304	1.41754e-13	4.45976e-13
NM_031193	Ren2	6.32225	2.93633e-19	1.10138e-18		NM_013930	Aass	-2.41704	3.76039e-155	5.65877e-154
NM_027543	Gpr173	6.32045	6.34808e-12	1.87831e-11		NM_019807	Acpp	-2.40388	1.17278e-148	1.69661e-147
NM_134066	Akr1c18	6.31504	3.70042e-165	5.87842e-164		NR_026907	Wbscr25	-2.40329	2.85045e-75	2.45417e-74
NM_011825	Grem2	6.31219	0	0		NM_053087	Epgn	-2.40109	1.85029e-48	1.16969e-47
NR_105915	Mir6950	6.30441	1.56588e-189	2.87708e-188		NM_001166273	Cspg5	-2.39045	5.50964e-24	2.3366e-23
NM_009364	Tfpi2	6.30374	0	0		NM_001166603	Chn1	-2.38815	5.58071e-102	6.0173e-101
NM_010882	Ndn	6.30091	6.47083e-220	1.41079e-218		NM_001099297	Duox1	-2.37857	9.76105e-78	8.62392e-77
NM_001163175	Begain	6.29812	3.3259e-37	1.80429e-36		NM_007786	Csn3	-2.37459	0	0
NM_010494	Icam2	6.29736	1.2448e-51	8.24967e-51		NM_001146005	C5ar2	-2.37457	1.39532e-93	1.41107e-92
NM_029210	Sv2c	6.29375	1.15788e-22	4.7511e-22		NM_007546	Bik	-2.37156	1.35654e-150	1.99158e-149
NM_009116	Prrx2	6.29331	3.95741e-160	6.12503e-159		NM_029639	Plet1	-2.37142	0	0
NM_010133	En1	6.28773	2.6599e-80	2.39668e-79		NM_001242940	Grin1os	-2.36919	2.59977e-25	1.13972e-24
NM_010729	Loxl1	6.2825	0	0		NM_007469	Apoc1	-2.3664	2.86692e-21	1.13614e-20
NM_001162884	Igsf10	6.28196	0	0		NM_015767	Ttpa	-2.36589	7.0858e-82	6.48163e-81
NM_023438	Tmem132e	6.28149	1.1522e-112	1.33766e-111		NM_022014	Fn3k	-2.36356	1.14356e-18	4.21683e-18
NM_011658	Twist1	6.28116	4.24246e-291	1.26175e-289		NM_008125	Gjb2	-2.36081	7.23665e-265	1.91198e-263
NM_011315	Saa3	6.28095	0	0		NM_020047	Tacstd2	-2.34632	0	0
NM_177161	P4ha3	6.27897	0	0		NM_133955	Rhou	-2.34043	0	0
NM_001033141	Ecscr	6.26621	1.55814e-99	1.6549e-98		NR_040714	Plet1os	-2.33549	0	0
NR_028265	Mirg	6.26331	1.2438e-11	3.64247e-11		NM_001081322	Myo5c	-2.32754	0	0
NM_001199556	AW551984	6.26274	7.52109e-19	2.78933e-18		NM_001164696	Klk6	-2.32416	1.40169e-127	1.7902e-126
NM_008610	Mmp2	6.25293	0	0		NM_009194	Slc12a2	-2.31886	0	0
NM_007769	Dmbt1	6.25214	1.23557e-11	3.61912e-11		NM_001004455	Cys1	-2.3169	3.32909e-08	8.26572e-08
NM_011356	Frzb	6.25085	3.22486e-25	1.40796e-24		NM_028770	Krt80	-2.31563	5.76895e-180	9.93386e-179
NM_019675	Stmn4	6.2479	1.07197e-24	4.62837e-24		NM_011600	Tle4	-2.31111	3.85021e-108	4.34073e-107
NM_026743	Tspan11	6.24427	0	0		NM_146117	Lrrc26	-2.30721	6.54823e-23	2.70255e-22
NM_001025570	Prrx1	6.24421	0	0		NM_146004	Mfsd6l	-2.29877	1.46854e-26	6.62793e-26
NM_001163144	Pcsk5	6.23886	0	0		NM_028307	Tdrkh	-2.298	1.08861e-28	5.12888e-28
NM_001111268	Grik2	6.23148	1.66904e-25	7.35891e-25		NM_009180	St6galnac2	-2.29637	2.15269e-113	2.50655e-112
NM_175035	Gimap5	6.23113	4.85397e-15	1.60346e-14		NM_011542	Tcea3	-2.29274	3.59498e-22	1.45635e-21
NM_025312	Sostdc1	6.22854	8.16228e-15	2.68033e-14		NM_001285484	Htr1d	-2.28705	5.6311e-19	2.09654e-18
NM_173447	Ephb1	6.22349	3.17806e-29	1.5138e-28		NM_175286	Tprn	-2.28669	0	0
NM_011352	Sema7a	6.2226	0	0		NM_001045516	Proca1	-2.27991	7.21641e-09	1.85151e-08
NM_026778	Cthrc1	6.21809	1.96229e-163	3.09419e-162		NM_001243792	Esrrg	-2.27613	8.95041e-28	4.14428e-27
NM_177350	Gldn	6.21302	1.80976e-18	6.63803e-18		NM_008862	Pkia	-2.27528	2.92552e-194	5.52557e-193
NM_173425	Fam124b	6.21116	1.90294e-11	5.51792e-11		NM_080595	Emid1	-2.27404	1.02545e-37	5.61252e-37
NM_011401	Slc2a3	6.21099	0	0		NM_177290	Itgb8	-2.26995	0	0
NM_008272	Hoxc9	6.20838	6.25337e-64	4.76078e-63		NM_176846	Exph5	-2.26686	3.05728e-91	3.02117e-90
NR_002870	Dnm3os	6.20364	0	0		NM_008909	Ppl	-2.26565	0	0
NM_145584	Spon1	6.20232	0	0		NM_001207021	AI848285	-2.26405	1.25435e-11	3.67142e-11
NM_013905	Heyl	6.20155	1.30117e-156	1.97415e-155		NM_175270	Sowahb	-2.25289	1.0495e-222	2.3192e-221
NM_001159648	Cntn1	6.19925	3.31863e-25	1.44868e-24		NM_133653	Mat1a	-2.25185	1.11425e-05	2.37747e-05
NM_001146268	Pdgfrb	6.19857	0	0		NM_177753	Sox21	-2.24972	1.95055e-59	1.41681e-58
NM_054041	Antxr1	6.19738	0	0		NM_027518	Gpr137c	-2.24843	2.66718e-64	2.04235e-63
NM_134102	Pla1a	6.19707	0	0		NM_001013751	Syna	-2.24808	3.55248e-13	1.09991e-12
NM_030101	Pgpep1l	6.19685	2.22966e-11	6.44438e-11		NM_016866	Stk39	-2.24361	0	0
NM_007992	Fbln2	6.18775	0	0		NM_001277290	Foxn1	-2.24252	0.000140727	0.000277022
NM_010253	Gal	6.18458	3.51673e-25	1.53394e-24		NM_146189	Mybpc2	-2.24097	3.10235e-32	1.559e-31
NR_027920	Msx1os	6.18099	8.38154e-186	1.50309e-184		NM_001177732	Plch1	-2.23574	2.37805e-07	5.64474e-07
NM_001113327	Fam131b	6.18089	6.65125e-46	4.06011e-45		NM_009221	Snca	-2.23138	1.48944e-39	8.36875e-39
NM_010934	Npy1r	6.17557	7.17676e-64	5.45927e-63		NR_046046	Gm13710	-2.23128	0.000470808	0.000879813
NM_018827	Crlf1	6.17309	0	0		NM_001081983	Tmsb15b1	-2.23035	2.30087e-19	8.65372e-19
NM_007666	Cdh6	6.17159	2.97024e-152	4.41218e-151		NM_001173550	C5ar1	-2.22905	5.7413e-30	2.76856e-29
NM_007407	Adcyap1r1	6.17121	0	0		NM_009902	Cldn3	-2.22624	0	0
NR_040396	D430036J16Rik	6.17072	1.26864e-21	5.06888e-21		NM_008609	Mmp15	-2.22523	0	0
NM_001081173	Lrch2	6.16946	5.50886e-92	5.49675e-91		NM_172296	Dmrta2	-2.22423	1.37323e-85	1.28936e-84
NM_008626	Mrc2	6.16757	0	0		NR_045161	A830009L08Rik	-2.22327	0.000730759	0.00134403
NM_145920	Evc2	6.16672	6.37537e-288	1.87795e-286		NM_145144	Aif1l	-2.21955	3.05808e-72	2.56203e-71
NM_001081114	Clip3	6.16337	0	0		NM_178715	Tmem30b	-2.21875	1.09101e-227	2.46605e-226
NM_178644	Oaf	6.1614	0	0		NM_138956	Rassf3	-2.21722	0	0
NM_009829	Ccnd2	6.15815	0	0		NM_028757	Nebl	-2.2151	1.18184e-105	1.30948e-104
NM_021292	Evc	6.14868	2.99596e-167	4.83421e-166		NM_007568	Btc	-2.20661	5.22737e-74	4.45219e-73
NM_008788	Pcolce	6.14726	0	0		NM_001114662	Mfsd4	-2.20624	2.98696e-73	2.5246e-72
NM_030708	Zfhx4	6.14622	2.1542e-225	4.82195e-224		NM_001277944	Apoc2	-2.2041	2.36239e-12	7.10615e-12
NM_018865	Wisp1	6.14597	0	0		NM_176835	Dnajc22	-2.20066	2.29086e-17	8.1427e-17
NM_008367	Il2ra	6.13906	3.92235e-11	1.11965e-10		NR_033629	BC021767	-2.20032	2.72065e-31	1.34762e-30
NM_029947	Prdm8	6.13769	3.97481e-11	1.13451e-10		NM_028974	Kbtbd13	-2.19976	6.113e-06	1.32849e-05
NM_007925	Eln	6.13645	0	0		NM_027161	Tmem52	-2.19728	3.03171e-28	1.41895e-27
NM_008476	Krt6a	6.13496	2.12705e-24	9.12409e-24		NM_001293727	Cgn	-2.19545	0	0
NM_008344	Igfbp6	6.13361	0	0		NM_130447	Dusp16	-2.19417	0	0
NM_001277170	Rbm46	6.11278	5.11127e-11	1.45274e-10		NM_133764	Atp6v0e2	-2.1932	2.81782e-120	3.44775e-119
NM_009323	Tbx15	6.11129	0	0		NR_073548	Scnn1b	-2.1923	4.91363e-45	2.96348e-44
NR_037988	Gm16701	6.11033	5.28179e-11	1.49951e-10		NM_138741	Sdpr	-2.19181	2.82549e-220	6.17483e-219
NM_001040631	C1qtnf5	6.10696	4.42085e-210	9.18985e-209		NM_001285414	Smagp	-2.19054	8.99843e-199	1.75339e-197
NM_001081351	Cped1	6.10214	0	0		NM_178143	Prkaa2	-2.17601	6.7275e-110	7.6626e-109
NM_183179	Kcnv2	6.09816	2.44391e-24	1.04654e-23		NM_145820	Veph1	-2.17477	2.97856e-26	1.3369e-25
NM_001290771	Tro	6.09364	1.64051e-17	5.85892e-17		NM_181579	Pof1b	-2.17128	2.19694e-103	2.39399e-102
NM_008695	Nid2	6.08964	3.58622e-244	8.72574e-243		NR_030693	4930412C18Rik	-2.16534	0.00132839	0.00238116
NM_017370	Hp	6.08063	0	0		NM_130861	Slco1a5	-2.16349	3.57832e-256	9.1234e-255
NM_029116	Kbtbd11	6.07786	1.70067e-74	1.45384e-73		NM_009399	Tnfrsf11a	-2.15934	1.47199e-145	2.08588e-144
NM_007442	Alx4	6.07637	7.39348e-257	1.89379e-255		NR_077063	2310002F09Rik	-2.15794	2.19014e-13	6.8307e-13
NM_145536	Ccm2l	6.07273	4.0641e-14	1.30229e-13		NM_026907	Sectm1b	-2.15606	1.72191e-41	9.89373e-41
NM_001038499	Arsi	6.07231	1.87656e-17	6.68556e-17		NM_178098	4930486L24Rik	-2.14727	1.81826e-129	2.3515e-128
NM_008270	Hoxb9	6.07081	1.12452e-20	4.37956e-20		NM_001163136	Macc1	-2.14346	0	0
NM_080455	Tshz2	6.06952	3.98965e-99	4.218e-98		NM_013675	Sptb	-2.14272	2.28099e-278	6.47114e-277
NM_145218	Wbscr17	6.06729	9.74841e-61	7.16548e-60		NM_175249	Psapl1	-2.13757	5.02475e-42	2.91251e-41
NM_183391	Tnfsf18	6.0593	3.23093e-81	2.937e-80		NM_001159344	Casz1	-2.13243	3.64194e-140	5.03453e-139
NM_001013384	Podnl1	6.04749	1.55656e-35	8.18141e-35		NM_172439	Inpp5j	-2.12791	4.69973e-56	3.27209e-55
NM_031402	Crispld1	6.04306	3.40091e-38	1.87361e-37		NM_001291336	Plekhb1	-2.12765	0	0
NM_007719	Ccr7	6.03772	7.97899e-14	2.52925e-13		NR_104436	Clmn	-2.12673	7.46146e-298	2.28288e-296
NM_022315	Smoc2	6.03022	0	0		NM_001160345	Svip	-2.12557	2.333e-79	2.09124e-78
NM_008069	Gabrb1	6.02993	1.14268e-10	3.2011e-10		NM_153541	Zbtb8b	-2.11887	9.59723e-37	5.171e-36
NM_175520	Hcar1	6.02737	7.14309e-14	2.26688e-13		NM_027251	2010107G23Rik	-2.11862	3.00122e-94	3.04957e-93
NM_021443	Ccl8	6.02587	0	0		NM_153784	Ccdc64b	-2.11855	3.9965e-186	7.17633e-185
NM_001190314	Mfrp	6.02441	1.57011e-198	3.04446e-197		NM_133995	Upb1	-2.11809	3.94476e-08	9.75323e-08
NM_001252623	Csgalnact1	6.02161	0	0		NM_024208	Echdc3	-2.11557	3.76019e-101	4.03081e-100
NM_001163481	Fkbp10	6.02025	0	0		NM_008632	Map2	-2.11057	0	0
NM_001286340	Tfap2b	6.01841	1.42532e-13	4.48322e-13		NM_011395	Slc22a3	-2.10266	0.000152282	0.000298896
NM_054044	Gpr124	6.00942	0	0		NR_045883	4930413F20Rik	-2.10218	1.21282e-89	1.1746e-88
NM_011372	St6galnac3	6.00329	2.25697e-61	1.67228e-60		NM_008983	Ptprk	-2.09933	0	0
NM_024198	Gpx7	6.00156	0	0		NM_001293728	Tuft1	-2.09505	1.8264e-302	5.70137e-301
NM_011824	Grem1	5.99643	2.96384e-74	2.52743e-73		NM_029803	Ifi27l2a	-2.09493	1.17166e-08	2.97443e-08
NM_001105245	Pcdh19	5.9959	0	0		NM_001034867	Pm20d2	-2.09376	5.77572e-30	2.78419e-29
NM_028804	Ccdc3	5.99441	1.35658e-45	8.25909e-45		NM_019521	Gas6	-2.09245	0	0
NR_102341	4921504A21Rik	5.98763	1.24173e-13	3.91641e-13		NM_001146299	Sh3rf2	-2.0895	1.91936e-27	8.81056e-27
NM_030206	Cygb	5.97909	0	0		NM_008879	Lcp1	-2.0865	0	0
NM_013661	Sema5b	5.97607	8.1417e-33	4.12734e-32		NM_145469	Nipal2	-2.08238	0	0
NM_019759	Dpt	5.97588	6.84087e-256	1.73777e-254		NM_013722	Syn3	-2.08042	7.89354e-53	5.2934e-52
NM_176922	Itga11	5.97381	0	0		NM_001277188	Ano4	-2.07763	2.85667e-39	1.59827e-38
NM_008350	Il11	5.9725	4.69002e-64	3.57353e-63		NM_007675	Ceacam10	-2.07678	2.48686e-12	7.47246e-12
NM_026439	Ccdc80	5.97215	0	0		NM_207267	Tmsb15l	-2.07665	6.75799e-22	2.71743e-21
NM_133686	Qprt	5.9634	7.97102e-114	9.29304e-113		NM_013470	Anxa3	-2.07567	0	0
NM_010827	Msc	5.9631	1.04197e-19	3.94411e-19		NM_153546	Mboat1	-2.07172	3.05573e-158	4.68236e-157
NM_001290549	Tek	5.96112	1.46623e-65	1.13658e-64		NM_030024	Prr15	-2.07163	1.65328e-34	8.55978e-34
NM_054042	Cd248	5.95948	0	0		NM_013780	Npas3	-2.0709	1.28346e-62	9.65437e-62
NM_029881	Tmem200a	5.95284	2.68917e-120	3.2918e-119		NM_001081064	Pdzd2	-2.0686	4.54536e-206	9.24056e-205
NM_001081125	Gli2	5.94626	1.479e-191	2.7411e-190		NM_001164099	Add3	-2.06622	3.65856e-303	1.14855e-301
NM_001291891	Adam19	5.94494	0	0		NM_009127	Scd1	-2.06526	0	0
NM_197999	Ces2g	5.94213	2.6385e-10	7.25352e-10		NM_017466	Ccrl2	-2.06489	1.44363e-133	1.91623e-132
NM_008005	Fgf18	5.93951	3.31461e-43	1.94983e-42		NM_001080967	Tmsb15b2	-2.06448	7.73432e-15	2.5413e-14
NM_024283	1500015O10Rik	5.93901	7.72398e-140	1.06562e-138		NM_001145637	Gm1661	-2.05315	0.00030706	0.000584905
NM_001276387	Ebf2	5.93886	4.47005e-167	7.196e-166		NM_010664	Krt18	-2.04854	0	0
NM_001252508	D430019H16Rik	5.93666	4.47867e-72	3.74539e-71		NM_001163103	Ppp1r36	-2.04539	4.51775e-26	2.01891e-25
NR_028030	Gm9767	5.93358	3.20593e-16	1.09931e-15		NM_008998	Rab17	-2.04276	2.482e-70	2.03205e-69
NM_022563	Ddr2	5.93216	0	0		NM_145395	Duoxa1	-2.04204	8.60136e-68	6.85953e-67
NM_013529	Gfpt2	5.93011	0	0		NM_001163559	Lrriq1	-2.04158	7.73069e-09	1.97961e-08
NM_172812	Htr2a	5.92785	3.38908e-63	2.56114e-62		NM_001177503	Plekhd1	-2.0365	5.38289e-11	1.52759e-10
NM_015814	Dkk3	5.92711	0	0		NM_001159957	Pde1c	-2.03383	3.28611e-20	1.26024e-19
NM_001290731	Hoxd8	5.92566	1.13866e-66	8.97479e-66		NM_027491	Rragd	-2.03176	3.85396e-122	4.77033e-121
NM_001285859	Sgip1	5.9238	1.29356e-25	5.71887e-25		NM_010164	Eya1	-2.03006	1.1101e-29	5.32622e-29
NM_008985	Ptprn	5.92341	0	0		NM_013560	Hspb1	-2.02867	0	0
NM_010459	Hoxb4	5.92217	3.19012e-82	2.9239e-81		NR_106179	Mir8101	-2.02107	1.82349e-07	4.35152e-07
NM_145983	Kcna5	5.91454	3.61806e-10	9.87973e-10		NM_001204241	Clec4a3	-2.0202	0.00109374	0.00197551
NM_009785	Cacna2d3	5.91402	3.82062e-10	1.04185e-09		NR_027961	9130230L23Rik	-2.01991	8.20862e-07	1.88356e-06
NM_029861	Cnrip1	5.90787	8.95577e-236	2.10149e-234		NM_001284525	Chit1	-2.01576	9.28305e-05	0.000185146
NM_172798	Tbx4	5.90665	3.75189e-10	1.02361e-09		NM_013483	Btn1a1	-2.01448	7.44973e-82	6.81227e-81
NM_011535	Tbx3	5.90518	2.84188e-234	6.64838e-233		NM_172728	Creb5	-2.01005	2.71706e-76	2.3621e-75
NM_007802	Ctsk	5.90279	0	0		NM_008756	Ocln	-2.00856	3.66923e-270	1.00194e-268
NM_001163610	Nhsl2	5.90085	1.77766e-171	2.93861e-170		NM_001252553	Folr1	-2.00664	1.79717e-53	1.21489e-52
NM_152839	Igj	5.89637	7.70446e-22	3.09441e-21		NM_013657	Sema3c	-2.00654	1.00954e-201	1.99238e-200
NM_013846	Ror2	5.8944	0	0		NM_031170	Krt8	-2.00278	0	0
NM_001291227	Slit2	5.89301	1.07857e-306	3.42877e-305		NM_011083	Pik3c2a	-1.99962	0	0
NM_001044380	Hhipl1	5.89182	0	0		NM_001013756	Grhl3	-1.99679	1.2069e-35	6.36045e-35
NM_009928	Col15a1	5.89123	0	0		NM_177638	Crb3	-1.99513	7.54705e-220	1.64414e-218
NR_029796	Mir214	5.88883	1.50709e-25	6.65228e-25		NM_175486	6430571L13Rik	-1.99247	2.44825e-17	8.70102e-17
NM_021560	Bhlhe22	5.88814	1.97161e-40	1.11961e-39		NM_170779	Wwc1	-1.99018	0	0
NM_001001183	Tmem204	5.88123	1.4441e-52	9.66073e-52		NM_008857	Prkci	-1.98975	0	0
NM_181728	Art3	5.88088	1.30845e-50	8.54678e-50		NM_001177656	Grin1	-1.98019	5.73278e-17	2.01466e-16
NM_001079869	Hoxb3	5.87547	8.2928e-149	1.20094e-147		NM_017379	Tuba8	-1.97806	8.54461e-17	2.98652e-16
NM_001198886	Dpp6	5.87391	5.65633e-110	6.44519e-109		NM_001029929	Zmynd15	-1.97592	9.32007e-145	1.3133e-143
NM_026271	Fibin	5.872	0	0		NM_001164251	Tpm1	-1.97515	0	0
NM_011866	Pde10a	5.87175	2.64174e-155	3.98188e-154		NM_001164047	Mb	-1.9751	1.34622e-16	4.67522e-16
NM_001042615	Htra3	5.87145	0	0		NM_007974	F2rl1	-1.9737	0	0
NM_001145977	Cadm2	5.87124	1.12475e-20	4.37956e-20		NM_177755	Klhl38	-1.96766	1.73262e-28	8.13539e-28
NM_026838	Srpx2	5.87084	4.27582e-264	1.12328e-262		NR_045840	4933416M07Rik	-1.96544	2.96124e-79	2.6518e-78
NM_013484	C2	5.85977	0	0		NM_025519	Chmp4c	-1.96257	7.43033e-243	1.78903e-241
NR_030416	Mir675	5.85037	2.32677e-40	1.31994e-39		NM_001163465	Rhpn1	-1.9598	0.000377545	0.000713671
NM_023814	Tbx18	5.84835	3.03641e-198	5.87939e-197		NM_172118	Myl9	-1.95236	1.67655e-156	2.54089e-155
NM_153175	Gimap6	5.84535	1.08266e-42	6.34049e-42		NM_029423	Rab11fip1	-1.95169	5.45087e-279	1.55117e-277
NM_008712	Nos1	5.84462	4.34932e-57	3.06433e-56		NM_001159564	Itgb6	-1.94687	3.40628e-105	3.76062e-104
NM_007986	Fap	5.84094	0	0		NM_001201322	4930415O20Rik	-1.94479	1.37995e-13	4.34298e-13
NM_001081328	Chsy3	5.83912	0	0		NM_011521	Sdc4	-1.94402	0	0
NM_008046	Fst	5.83893	0	0		NM_001114545	Ksr2	-1.94368	6.02068e-08	1.47659e-07
NM_028386	Asphd2	5.83786	1.4404e-75	1.24324e-74		NM_009670	Ank3	-1.943	1.01495e-165	1.61976e-164
NM_011196	Ptger3	5.83688	2.9942e-161	4.6629e-160		NM_010005	Cyp2d10	-1.94255	3.65214e-09	9.52295e-09
NM_001130189	Sgce	5.83493	3.12455e-184	5.54943e-183		NM_001145899	Slc15a2	-1.94171	1.45203e-282	4.20117e-281
NM_008908	Ppic	5.8329	0	0		NM_010100	Edar	-1.9403	1.62431e-37	8.8482e-37
NM_010231	Fmo1	5.82423	8.04654e-62	5.99249e-61		NM_008430	Kcnk1	-1.93573	0	0
NM_010132	Emx2	5.81062	1.158e-80	1.04715e-79		NR_045290	4732491K20Rik	-1.93465	1.50466e-23	6.30774e-23
NM_025429	Serpinb1a	5.80972	8.6409e-98	9.0082e-97		NM_001039546	Myo6	-1.93166	0	0
NM_007390	Chrna7	5.80957	1.99384e-27	9.14031e-27		NM_023158	Cxcl16	-1.93046	0	0
NM_008438	Kera	5.80926	1.09515e-09	2.92559e-09		NM_001285841	Sybu	-1.93018	6.7489e-16	2.28896e-15
NM_008966	Ptgfr	5.80373	1.83153e-21	7.29688e-21		NM_134253	Bnipl	-1.92436	2.10477e-97	2.18355e-96
NM_010555	Il1r2	5.80279	1.26165e-18	4.6467e-18		NM_001037927	Wdr93	-1.92178	0.000133507	0.000263259
NM_001243046	Dlg2	5.79789	3.57855e-66	2.79985e-65		NM_001128151	Cecr2	-1.92167	3.25369e-68	2.60757e-67
NM_172869	Frmd3	5.7925	1.08425e-09	2.89674e-09		NM_172867	Zfp462	-1.9166	0	0
NM_008216	Has2	5.79057	5.79757e-221	1.27001e-219		NM_138742	Nap1l3	-1.91543	9.29624e-20	3.52318e-19
NM_013555	Hoxd9	5.78147	1.63497e-12	4.94869e-12		NM_029094	Pik3cb	-1.91465	0	0
NM_134032	Hoxb2	5.77738	2.25407e-91	2.23623e-90		NM_025276	Evpl	-1.91092	9.67081e-122	1.19436e-120
NM_027904	Cpn2	5.77685	1.86524e-12	5.63274e-12		NM_001282096	Tjp3	-1.91034	3.82386e-307	1.22262e-305
NM_027547	Prdm5	5.77241	4.61025e-53	3.09762e-52		NR_003202	Pinc	-1.90372	4.44969e-15	1.47166e-14
NM_183297	Nxph4	5.77136	1.53389e-111	1.76524e-110		NM_015825	Sh3bgr	-1.90243	1.88037e-06	4.21686e-06
NM_008409	Itm2a	5.77007	0	0		NM_027571	P2ry12	-1.89564	0.00404763	0.0069336
NM_013526	Gdf6	5.76895	1.86047e-50	1.21239e-49		NM_009661	Alox8	-1.89434	0.000395368	0.000745529
NM_008555	Masp1	5.76709	4.90153e-217	1.05453e-215		NM_007914	Ehf	-1.89328	0	0
NM_146578	Olfr1033	5.765	1.34013e-09	3.5666e-09		NM_013832	Rasal1	-1.89075	5.87407e-207	1.20123e-205
NM_001145162	Ube2ql1	5.76214	1.04707e-35	5.52973e-35		NM_025961	Gatm	-1.88654	2.11789e-55	1.46386e-54
NM_009144	Sfrp2	5.75834	2.60903e-148	3.75866e-147		NM_026346	Fbxo32	-1.88601	0	0
NM_008269	Hoxb6	5.75791	7.06023e-24	2.98733e-23		NM_172785	Zc3h12d	-1.88586	1.70304e-12	5.15079e-12
NM_009931	Col4a1	5.75528	0	0		NM_011391	Slc16a7	-1.88561	7.62715e-31	3.7458e-30
NM_001109914	Apold1	5.75358	1.40171e-94	1.42901e-93		NM_026345	Mansc1	-1.8855	0	0
NM_026594	Rpl39l	5.75249	2.69029e-44	1.60266e-43		NM_001161627	Tmem116	-1.88081	1.57881e-05	3.33427e-05
NM_001252403	Gria1	5.74936	8.91645e-36	4.7179e-35		NM_030166	Galnt15	-1.88078	7.04252e-17	2.46742e-16
NM_198612	Gxylt2	5.74895	2.34622e-91	2.32597e-90		NR_045459	4833427F10Rik	-1.87994	3.6512e-28	1.70687e-27
NM_010140	Epha3	5.74837	2.29988e-93	2.3199e-92		NM_133853	Magi3	-1.87861	9.94578e-196	1.89271e-194
NR_045643	5930403L14Rik	5.74381	1.64493e-09	4.36102e-09		NM_172563	Hlf	-1.87751	6.0758e-168	9.82669e-167
NM_001163686	Dok5	5.7437	2.95996e-95	3.02764e-94		NM_001009573	Unc13d	-1.87657	7.09558e-126	8.96302e-125
NM_001002927	Penk	5.74044	1.64778e-197	3.17504e-196		NR_037982	9330159M07Rik	-1.8737	0.00173789	0.00308405
NM_130451	Slc2a10	5.73907	1.99413e-209	4.12362e-208		NM_001033288	Sbspon	-1.87268	2.31685e-33	1.18295e-32
NM_008872	Plat	5.73416	0	0		NM_015775	Tmprss2	-1.87007	3.0671e-162	4.7926e-161
NM_001289742	Lrrc4c	5.72243	3.25925e-12	9.74152e-12		NM_133898	N4bp2l1	-1.86399	7.44445e-44	4.40636e-43
NM_001048207	Gypc	5.7217	1.3812e-111	1.59151e-110		NM_019563	Cited4	-1.8638	8.70442e-233	2.02195e-231
NM_175513	Zfp804a	5.72149	6.70467e-268	1.80941e-266		NM_001130479	Nucb2	-1.86288	2.5346e-282	7.31809e-281
NM_001164504	Rnf165	5.71873	2.82515e-31	1.39888e-30		NM_008478	L1cam	-1.86236	6.29255e-59	4.54327e-58
NM_011546	Zeb1	5.70711	0	0		NM_001290633	Reps2	-1.85773	5.68319e-150	8.29093e-149
NM_013665	Shox2	5.70614	1.51008e-106	1.6826e-105		NM_001081079	Ogfrl1	-1.85514	0	0
NM_001013764	Ces1a	5.70585	1.78173e-20	6.89702e-20		NR_040623	Chn1os3	-1.8538	2.05799e-17	7.32345e-17
NM_153778	Atoh8	5.70395	2.21117e-20	8.53669e-20		NM_008091	Gata3	-1.84566	5.61168e-229	1.27258e-227
NM_012028	St6galnac5	5.70139	6.29462e-15	2.07268e-14		NM_001177881	Mfap3l	-1.84322	0	0
NM_001033778	Gm5535	5.69962	2.19134e-46	1.34477e-45		NM_010725	Lmx1b	-1.84276	2.24116e-32	1.12807e-31
NM_010517	Igfbp4	5.69633	0	0		NM_027715	Otud1	-1.84005	2.65628e-77	2.33269e-76
NR_033141	Gm6994	5.69552	2.46687e-09	6.48795e-09		NM_145976	Tifab	-1.83823	8.84869e-11	2.48793e-10
NM_011058	Pdgfra	5.69494	0	0		NM_025949	Rps6ka6	-1.8376	3.36953e-66	2.63929e-65
NM_178749	Stk32a	5.69176	3.01298e-23	1.25434e-22		NM_001033324	Zbtb16	-1.83726	6.28691e-16	2.13645e-15
NM_008067	Gabra3	5.68933	2.64071e-09	6.93397e-09		NM_009895	Cish	-1.83361	1.07632e-46	6.64484e-46
NM_008158	Gpr27	5.68933	2.64071e-09	6.93397e-09		NM_138750	Prom2	-1.83347	1.51431e-118	1.8286e-117
NM_007539	Bdkrb1	5.68353	1.21589e-42	7.11317e-42		NM_028179	2200002D01Rik	-1.83343	3.81422e-187	6.89374e-186
NM_001289496	Egflam	5.67998	2.19068e-227	4.93554e-226		NM_007791	Csrp1	-1.8334	0	0
NM_009776	Serping1	5.67938	0	0		NM_177866	Catsper4	-1.83184	0.000788858	0.00144606
NM_153131	Unc5a	5.67713	4.5742e-43	2.68564e-42		NM_013706	Cd52	-1.82665	3.01724e-33	1.53829e-32
NR_002874	Has2os	5.67302	4.69717e-103	5.11241e-102		NR_015615	4732416N19Rik	-1.82538	9.73733e-07	2.22548e-06
NM_001271508	Lsp1	5.6702	0	0		NM_009917	Ccr5	-1.82443	3.35758e-14	1.07914e-13
NM_010336	Lpar1	5.6685	0	0		NM_028478	Rassf6	-1.82313	3.29647e-50	2.14313e-49
NM_009932	Col4a2	5.66592	0	0		NM_029361	Wnk2	-1.82091	2.28827e-231	5.25808e-230
NR_037313	Mir1906-2	5.66306	7.55039e-12	2.22881e-11		NM_001029912	Zswim5	-1.81823	1.71799e-58	1.23173e-57
NR_035440	Mir1906-1	5.66306	7.55039e-12	2.22881e-11		NM_008115	Gfra2	-1.81714	8.46099e-47	5.23406e-46
NM_001290410	Nkain3	5.66236	3.43002e-20	1.31452e-19		NM_028133	Egln3	-1.81698	1.44773e-25	6.39538e-25
NM_001271578	Sec1	5.65953	3.56807e-09	9.30635e-09		NM_133681	Tspan1	-1.81297	2.87085e-16	9.85994e-16
NM_175526	Clec1a	5.6516	3.36367e-34	1.73536e-33		NM_027897	Rhpn2	-1.80971	5.55092e-183	9.79602e-182
NM_001277268	Fgf5	5.65123	3.68327e-09	9.60229e-09		NM_001291049	Usp43	-1.80938	5.06276e-91	4.97985e-90
NM_008083	Gap43	5.64918	3.77747e-09	9.8414e-09		NM_008528	Blnk	-1.80739	2.32899e-46	1.42892e-45
NM_153135	Unc5d	5.64828	9.52109e-26	4.22077e-25		NM_011580	Thbs1	-1.80734	7.50496e-67	5.92036e-66
NM_010332	Ednra	5.64429	0	0		NM_178936	Tmem56	-1.80694	6.16326e-27	2.79487e-26
NM_001033597	Acsl6	5.64296	3.77072e-17	1.33326e-16		NM_001163015	Gprasp2	-1.80621	1.3943e-09	3.70648e-09
NM_172706	9330182L06Rik	5.64037	9.08404e-33	4.60253e-32		NM_001039537	Lif	-1.80581	0	0
NM_080285	Cttnbp2	5.63479	3.51812e-106	3.91061e-105		NM_009721	Atp1b1	-1.80546	0	0
NM_008215	Has1	5.63438	4.59139e-32	2.29935e-31		NM_172287	Spire2	-1.80292	4.29689e-32	2.1542e-31
NM_011607	Tnc	5.63417	0	0		NM_011674	Ugt8a	-1.80198	3.82457e-41	2.1907e-40
NM_001160261	Fam78b	5.63269	1.1897e-215	2.54178e-214		NM_001166456	Slc38a1	-1.80039	1.16111e-181	2.03095e-180
NM_010465	Hoxc6	5.63255	1.77904e-139	2.44709e-138		NM_001045530	Ccnjl	-1.79906	1.12626e-44	6.74855e-44
NM_001136072	Meis2	5.63224	5.56695e-152	8.23855e-151		NM_053106	Lmod1	-1.79899	1.76805e-148	2.5551e-147
NM_001077202	Hs6st2	5.62349	3.70732e-174	6.20629e-173		NM_026414	Asprv1	-1.79541	1.62592e-24	6.99396e-24
NR_121616	Ndst3	5.61905	6.83825e-17	2.39676e-16		NM_001024954	Pbx4	-1.79508	0.00428568	0.00732237
NM_009822	Runx1t1	5.61511	1.71758e-87	1.64163e-86		NM_016875	Ybx2	-1.79433	3.05621e-11	8.77473e-11
NM_010482	Htr1b	5.60796	1.95108e-81	1.7765e-80		NM_173419	Dleu7	-1.79313	0.000965939	0.00175498
NM_025331	Gng11	5.60688	0	0		NM_021375	Rhbg	-1.79113	1.90011e-07	4.52968e-07
NR_045119	Nlrp5-ps	5.60323	1.22412e-11	3.58674e-11		NM_175256	Heg1	-1.78971	1.02063e-252	2.56444e-251
NM_010466	Hoxc8	5.60187	6.09356e-211	1.26956e-209		NR_073370	4930451G09Rik	-1.78956	1.30441e-17	4.67786e-17
NM_008130	Gli3	5.59961	0	0		NM_021406	Trem1	-1.78885	0.000204943	0.000396968
NM_182808	Fam19a1	5.59859	1.31721e-11	3.84809e-11		NM_013589	Ltbp2	-1.78869	0	0
NM_001040611	Peg10	5.59853	1.2352e-38	6.84438e-38		NM_144847	Nrbp2	-1.78817	3.73457e-257	9.57469e-256
NM_001277305	Adamts2	5.59545	0	0		NM_001002268	Gpr126	-1.78776	0	0
NM_198636	Acss3	5.59538	1.70846e-67	1.35896e-66		NM_001164584	Dnajc6	-1.78654	5.30199e-50	3.44052e-49
NM_181418	Ushbp1	5.59455	1.44256e-42	8.43036e-42		NM_025404	Arl4d	-1.78653	5.1234e-19	1.90957e-18
NM_011097	Pitx1	5.593	1.51966e-11	4.42134e-11		NM_019771	Dstn	-1.78488	0	0
NM_177839	Tnn	5.58798	9.68426e-17	3.37845e-16		NM_010074	Dpp4	-1.77924	2.33528e-07	5.54558e-07
NM_001024539	Shc2	5.58692	0	0		NM_030180	Usp54	-1.77891	5.19875e-269	1.41126e-267
NM_172909	Cd163l1	5.58614	6.66469e-09	1.71281e-08		NM_001033311	Vsig10	-1.77742	2.81341e-203	5.60838e-202
NM_001099298	Scn2a1	5.58566	7.59485e-25	3.28995e-24		NM_176999	Atp10b	-1.77739	5.09994e-133	6.74366e-132
NM_028472	Bmper	5.5852	0	0		NM_178675	Slc35f1	-1.77633	3.8112e-18	1.38725e-17
NM_013553	Hoxc4	5.58414	1.23852e-35	6.52584e-35		NM_001220499	Rnf223	-1.77601	0.00176008	0.00312243
NM_177068	Olfml2b	5.58356	0	0		NM_001034059	Ccdc160	-1.77369	0.0011729	0.0021127
NM_031176	Tnxb	5.58352	3.04844e-46	1.86744e-45		NR_102319	9330188P03Rik	-1.7736	2.37744e-23	9.92296e-23
NR_003634	Rps4l	5.58336	3.8179e-71	3.15469e-70		NM_001163536	Dnajc5b	-1.77353	0.00125463	0.00225347
NM_011348	Sema3e	5.58281	2.07631e-24	8.90918e-24		NM_025877	Slc25a23	-1.77274	3.35558e-267	9.0119e-266
NM_001163565	Ptpn5	5.57962	6.8776e-17	2.40994e-16		NM_001271556	Aire	-1.76972	0.00425727	0.00727561
NM_144944	Prokr2	5.57622	7.97526e-56	5.54145e-55		NM_177353	Slc9a7	-1.76951	3.87818e-11	1.10727e-10
NM_175522	Elfn1	5.57214	3.34851e-59	2.42397e-58		NM_021877	Hr	-1.76752	3.00355e-259	7.78702e-258
NM_009699	Aqp2	5.57154	0	0		NM_173778	Sh2d7	-1.76746	1.12553e-09	3.00527e-09
NM_001081027	Kcnt2	5.56949	2.7328e-19	1.02615e-18		NM_177395	Map3k9	-1.76534	4.88786e-93	4.92324e-92
NR_045195	A830082K12Rik	5.56814	3.91138e-45	2.36468e-44		NM_020557	Cmpk2	-1.76143	1.6229e-17	5.7975e-17
NM_146550	Olfr810	5.5647	5.58449e-14	1.77959e-13		NM_022032	Perp	-1.76043	0	0
NM_139198	Plac8	5.56218	1.32335e-86	1.25316e-85		NM_001145015	Arhgap40	-1.75696	0.00118345	0.00213101
NM_001159407	B3gnt5	5.55879	8.41887e-09	2.15165e-08		NR_040353	E030013I19Rik	-1.75631	1.51834e-37	8.27583e-37
NM_001285794	Wnt11	5.55444	1.03233e-243	2.50518e-242		NM_023485	Sync	-1.75606	7.22389e-52	4.79785e-51
NM_010910	Nefl	5.55321	9.11153e-09	2.32568e-08		NM_178695	Prrg4	-1.75574	6.2277e-232	1.43341e-230
NM_007843	Defb1	5.55147	8.62894e-09	2.20473e-08		NM_172723	Adap1	-1.75479	4.26823e-37	2.31233e-36
NM_153127	Mmrn2	5.54099	1.02601e-84	9.58152e-84		NM_001110233	Ngfrap1	-1.75365	0	0
NM_001199632	Fbxl13	5.53505	5.36645e-27	2.43792e-26		NM_001159738	Ccl20	-1.75256	1.51786e-13	4.76779e-13
NM_033610	Sncb	5.53189	2.11987e-13	6.61672e-13		NM_146260	Tmie	-1.75121	8.16633e-12	2.40858e-11
NR_033137	Zfp57	5.52289	2.3805e-52	1.5902e-51		NM_001146059	Als2cl	-1.75016	3.63948e-284	1.05633e-282
NM_013456	Actn3	5.51813	1.18656e-34	6.16296e-34		NM_029264	Ttll10	-1.74817	6.44073e-48	4.04577e-47
NM_033603	Amn	5.51718	1.66789e-90	1.62958e-89		NM_153551	Dennd1c	-1.74712	1.43154e-29	6.85421e-29
NM_001033335	Serpina3f	5.51601	1.6789e-34	8.69081e-34		NM_194333	Slc23a3	-1.7461	0.000302681	0.000576922
NM_145711	Tox	5.51419	2.03968e-16	7.04725e-16		NM_029198	4930538K18Rik	-1.74549	0.00421413	0.00720589
NR_029810	Mir199a-2	5.50868	9.14174e-14	2.89253e-13		NM_008185	Gstt1	-1.74242	5.62586e-124	7.03906e-123
NM_172119	Dio3	5.50668	1.36552e-08	3.45358e-08		NM_175684	Fchsd1	-1.74113	2.99074e-185	5.34953e-184
NM_009181	St8sia2	5.50662	1.1316e-124	1.42099e-123		NM_027032	Pacrg	-1.74094	9.48186e-05	0.000188975
NM_010320	Gng8	5.50081	3.43209e-29	1.63284e-28		NM_173370	Cds1	-1.73891	9.67174e-80	8.68355e-79
NM_001037987	Edil3	5.49837	0	0		NM_027937	Caskin1	-1.73739	6.50837e-21	2.554e-20
NM_001252071	Greb1	5.49155	4.08452e-11	1.16534e-10		NM_029044	Lrrc48	-1.7333	2.80612e-07	6.62733e-07
NM_001039094	Negr1	5.48303	4.11193e-47	2.55338e-46		NM_001160268	Plekha6	-1.7316	1.06618e-133	1.4159e-132
NM_008012	Akr1b8	5.47967	0	0		NM_178045	Rassf4	-1.72959	0	0
NM_001024842	Hoxc11	5.46411	1.79903e-08	4.52766e-08		NM_001114312	4930506M07Rik	-1.72956	1.76216e-259	4.58145e-258
NM_009135	Scn7a	5.45714	1.85971e-103	2.0281e-102		NM_025491	Susd3	-1.7287	0.00212358	0.00373974
NM_009943	Cox6a2	5.45706	2.30964e-23	9.6429e-23		NM_033541	Oas1c	-1.72836	4.91137e-30	2.37207e-29
NM_001098203	Hic1	5.45701	0	0		NM_001285791	Ildr1	-1.7278	0	0
NM_026979	C1qtnf2	5.45653	1.44874e-61	1.07545e-60		NM_181407	Me3	-1.72763	8.47028e-39	4.7114e-38
NR_102294	C430002N11Rik	5.45388	1.12386e-15	3.78893e-15		NM_080465	Kcnn2	-1.72364	0.000846097	0.00154678
NM_019753	Cdh17	5.45176	5.99199e-18	2.16935e-17		NM_028096	2010300C02Rik	-1.72354	5.633e-98	5.88574e-97
NM_001167777	Asxl3	5.45118	1.16634e-15	3.92976e-15		NM_008052	Dtx1	-1.72235	1.09066e-50	7.12923e-50
NM_007904	Ednrb	5.45027	5.40594e-98	5.65276e-97		NR_003513	Neat1	-1.72162	3.26866e-21	1.29294e-20
NM_001024714	Cma2	5.44886	5.6996e-28	2.64881e-27		NR_029464	5033406O09Rik	-1.71988	0.000546971	0.00101672
NM_153166	Cpne5	5.4442	1.02455e-10	2.87629e-10		NM_178920	Mal2	-1.71696	5.7613e-212	1.2076e-210
NM_008480	Lama1	5.43482	6.06572e-127	7.71137e-126		NM_013906	Adamts8	-1.71575	1.15188e-42	6.74157e-42
NM_133733	Clmp	5.43053	0	0		NM_153793	Rell2	-1.7142	3.06505e-58	2.19128e-57
NM_001081667	Klhl34	5.42844	2.31797e-08	5.79419e-08		NM_009416	Tpm2	-1.71183	2.8518e-191	5.27478e-190
NM_177751	Cnksr2	5.42594	9.35923e-16	3.16381e-15		NM_010006	Cyp2d9	-1.70973	1.03762e-10	2.91238e-10
NM_175501	Adamts12	5.42571	0	0		NR_028577	D030025P21Rik	-1.70889	6.83804e-203	1.35921e-201
NR_105992	Mir7025	5.42426	1.51313e-92	1.51691e-91		NM_019992	Stap1	-1.70704	7.41769e-06	1.60385e-05
NM_001033124	Ntrk1	5.42371	2.64568e-08	6.59551e-08		NM_174866	Klk14	-1.70703	8.66196e-19	3.20686e-18
NM_182809	Ntrk3	5.4211	4.09975e-13	1.26694e-12		NM_001033308	Themis2	-1.70647	6.29783e-09	1.62064e-08
NM_011985	Mmp23	5.41737	2.79417e-164	4.41849e-163		NM_008651	Mybl1	-1.70522	4.19273e-55	2.89003e-54
NM_023279	Tubb3	5.41378	5.729e-91	5.62719e-90		NM_009373	Tgm2	-1.70479	0	0
NM_183171	Fez1	5.41006	1.30113e-38	7.2083e-38		NM_001033446	Arl14epl	-1.70377	0.00218112	0.00383374
NM_008120	Gja4	5.40899	5.3288e-25	2.31595e-24		NM_028715	Fcho1	-1.7029	4.5886e-25	1.99613e-24
NM_022312	Tnr	5.40531	3.4369e-13	1.06471e-12		NM_207202	Ccdc120	-1.70182	7.2322e-218	1.56203e-216
NM_013527	Gdf7	5.40411	2.82989e-08	7.0452e-08		NM_024479	Wbscr27	-1.70127	8.99301e-107	1.00325e-105
NM_001160326	Serp2	5.40377	1.35486e-20	5.26273e-20		NM_001082548	Spint2	-1.70087	0	0
NM_174990	Gimap4	5.4017	1.14889e-74	9.83663e-74		NM_001081331	D7Ertd443e	-1.69974	2.31674e-64	1.77549e-63
NM_031166	Id4	5.39984	1.80257e-100	1.92337e-99		NM_029495	Epsti1	-1.69812	1.83189e-23	7.66212e-23
NM_133918	Emilin1	5.39947	0	0		NM_025768	Grtp1	-1.69609	2.13539e-39	1.1969e-38
NM_177905	Piwil4	5.39211	1.16035e-22	4.76056e-22		NR_030696	9930014A18Rik	-1.69326	3.48629e-157	5.30395e-156
NM_001033534	Layn	5.38954	0	0		NM_007962	Mpzl2	-1.69231	1.1997e-165	1.91351e-164
NM_145831	Dmrt2	5.38828	1.69875e-15	5.69177e-15		NM_011894	Sh3bp5	-1.69038	2.46193e-179	4.23144e-178
NM_010577	Itga5	5.38466	0	0		NM_198967	Tmtc1	-1.68919	2.27759e-58	1.63125e-57
NM_001040689	Rspo4	5.37599	2.09294e-17	7.44684e-17		NM_001111304	Tbc1d9	-1.68735	9.03744e-139	1.23635e-137
NM_175460	Nmnat2	5.36876	3.09011e-95	3.1596e-94		NM_178410	Marveld2	-1.68595	7.02066e-171	1.15436e-169
NM_008356	Il13ra2	5.36778	2.50197e-49	1.60289e-48		NM_001040426	Thsd4	-1.68501	7.12438e-267	1.90965e-265
NM_001110843	Cacna2d1	5.36633	0	0		NM_177787	Slc15a5	-1.68426	3.86348e-11	1.1033e-10
NM_001013770	Lipo1	5.36392	1.53067e-48	9.6919e-48		NM_144914	Tmem184a	-1.68398	8.60161e-165	1.36565e-163
NM_001164518	Iglon5	5.36277	3.08756e-168	4.99657e-167		NR_110496	A330074K22Rik	-1.6839	3.89307e-09	1.01359e-08
NM_028351	Rspo3	5.36173	6.57186e-51	4.30898e-50		NM_144800	Mtss1	-1.68099	0	0
NM_007429	Agtr2	5.35723	4.11836e-08	1.01716e-07		NM_031178	Tlr9	-1.68068	0.00360887	0.00620543
NM_175535	Arhgap20	5.35546	6.9043e-22	2.77585e-21		NM_028980	Ppp4r4	-1.67991	2.69414e-16	9.25994e-16
NM_183180	Tspan18	5.35036	4.0775e-282	1.17606e-280		NM_028182	Sh2d4a	-1.67974	2.82694e-54	1.93034e-53
NM_027399	Steap1	5.34911	1.42418e-72	1.19715e-71		NM_021377	Sorcs1	-1.67789	4.72996e-11	1.34657e-10
NM_001164108	Ripk3	5.33703	0	0		NM_144919	Hdac11	-1.67673	1.31545e-144	1.85267e-143
NM_001172121	Rbms3	5.33597	0	0		NM_021320	Ntn4	-1.67613	1.38977e-104	1.52583e-103
NM_178655	Ank2	5.33489	3.0342e-251	7.56202e-250		NM_001033500	Wdr72	-1.67577	9.20227e-17	3.21354e-16
NM_139001	Cspg4	5.33438	0	0		NM_020516	Slc16a8	-1.67226	0.00065993	0.00121835
NM_011820	Ggt5	5.33011	8.36514e-68	6.67307e-67		NM_016854	Ppp1r3c	-1.67013	2.22121e-67	1.76277e-66
NM_026280	Mxra7	5.32818	0	0		NM_001122759	Pde7a	-1.66766	0	0
NM_001163702	Fbxo27	5.32672	1.66361e-76	1.44945e-75		NM_019919	Ltbp1	-1.66739	1.03225e-133	1.37149e-132
NM_021387	Vstm2b	5.32414	8.85754e-15	2.90519e-14		NM_177610	Duox2	-1.66726	0.00279143	0.00485625
NM_024237	Fbln7	5.31803	0	0		NM_172826	Dact2	-1.66533	1.29001e-304	4.06361e-303
NM_031247	Gimap3	5.30549	7.1211e-08	1.74092e-07		NM_126166	Tlr3	-1.66443	1.1566e-256	2.9598e-255
NM_009511	Vipr2	5.29876	1.56964e-12	4.75564e-12		NM_009846	Cd24a	-1.66257	0	0
NM_001294280	Timp1	5.28791	0	0		NM_001164263	Plekhs1	-1.65715	6.67917e-78	5.90861e-77
NM_177391	Fam109b	5.28498	1.93533e-168	3.1356e-167		NM_146173	Tspan33	-1.65662	1.15784e-82	1.06334e-81
NM_145078	2610305D13Rik	5.27406	2.21281e-12	6.66709e-12		NM_011402	Slc34a2	-1.65385	2.90344e-28	1.35914e-27
NM_008512	Lrp1	5.27292	0	0		NM_133191	Eps8l2	-1.64892	0	0
NM_052992	Fxyd1	5.27277	3.93243e-51	2.59004e-50		NM_008533	Cd180	-1.64744	1.42511e-11	4.15455e-11
NM_010713	Lhx8	5.26558	3.13555e-44	1.8671e-43		NM_145394	Slc44a3	-1.6458	7.78164e-173	1.29409e-171
NM_152923	Kcnq3	5.26047	8.46924e-69	6.83289e-68		NR_033542	Gm10636	-1.64552	0.000316494	0.000602213
NM_008458	Serpina3c	5.26042	2.3569e-12	7.09195e-12		NM_001173553	Cdc14a	-1.64202	2.23172e-162	3.49317e-161
NM_028001	Jsrp1	5.25923	2.50281e-12	7.51876e-12		NM_001110337	Gprc5c	-1.64055	7.72587e-251	1.92376e-249
NM_001201470	Papss2	5.25904	0	0		NM_177608	Secisbp2l	-1.64006	0	0
NM_001123382	Il1r1	5.25793	0	0		NM_001099288	Arhgap44	-1.63984	7.99047e-193	1.49492e-191
NM_001198766	Postn	5.25722	0	0		NM_024450	Scd3	-1.63764	3.98337e-30	1.92622e-29
NM_001253759	Enox1	5.25446	1.12523e-122	1.40029e-121		NM_001177696	Ablim2	-1.63655	1.67032e-10	4.63792e-10
NM_011587	Tie1	5.25439	1.22757e-204	2.47021e-203		NR_045694	Gm4961	-1.63628	1.26677e-07	3.05085e-07
NM_001081033	Pde11a	5.25127	1.5547e-83	1.43829e-82		NM_001163510	Kcnn4	-1.63463	3.09234e-259	8.00971e-258
NM_053242	Foxp2	5.24852	1.79339e-14	5.82012e-14		NM_001081048	Slc25a18	-1.63355	1.23424e-09	3.28826e-09
NM_001081349	Slc43a1	5.24086	2.34413e-63	1.77437e-62		NM_027564	4921507P07Rik	-1.63189	8.18914e-12	2.41505e-11
NM_009865	Cdh10	5.24053	2.49531e-172	4.13729e-171		NM_028176	Cda	-1.6312	1.48772e-41	8.55348e-41
NR_045079	3300005D01Rik	5.23553	1.43087e-91	1.4226e-90		NM_144796	Susd4	-1.63098	1.07986e-40	6.14853e-40
NM_027928	Chst13	5.22874	8.77288e-12	2.5839e-11		NM_001162926	Fam84b	-1.62977	3.45388e-287	1.01631e-285
NM_010258	Gata6	5.22563	9.21836e-104	1.0065e-102		NM_001025255	Mbp	-1.6297	9.43827e-45	5.66398e-44
NM_178884	Obsl1	5.22428	0	0		NM_011426	Siglec1	-1.62861	7.7841e-11	2.19328e-10
NM_008183	Gstm2	5.2221	0	0		NR_029470	Gm10863	-1.62845	1.19612e-39	6.72614e-39
NM_001291857	Aebp1	5.20927	0	0		NR_106117	Mir7657	-1.62676	4.83607e-23	2.00398e-22
NM_020283	B3galt1	5.2078	3.52717e-44	2.09714e-43		NR_105972	Mir7005	-1.62329	7.89767e-06	1.70496e-05
NM_022415	Ptges	5.19934	1.65651e-305	5.23597e-304		NM_001110506	Efcab12	-1.62264	0.000145626	0.000286421
NM_001161796	Gucy1b3	5.19359	8.06828e-140	1.11146e-138		NM_080637	Nme5	-1.62162	3.44132e-19	1.28818e-18
NM_011923	Angptl2	5.19082	0	0		NM_025865	2310030G06Rik	-1.61832	1.63885e-122	2.03672e-121
NM_178791	Vstm4	5.18725	5.05927e-174	8.44911e-173		NM_011206	Ptpn18	-1.61519	5.47509e-98	5.72291e-97
NM_009382	Thy1	5.18167	2.00574e-276	5.63826e-275		NM_001256218	Rap1gap	-1.61349	5.94453e-160	9.19543e-159
NM_008278	Hpgd	5.17915	1.42898e-90	1.39665e-89		NM_027865	Tmem25	-1.61197	1.33051e-12	4.04396e-12
NM_011780	Adam23	5.17836	5.73563e-206	1.16518e-204		NR_045076	Gm19510	-1.61181	0.00140111	0.00250648
NM_024414	Stx1b	5.17606	4.26018e-14	1.36402e-13		NM_001113400	Zfp385b	-1.61136	2.14697e-14	6.95048e-14
NM_009253	Serpina3m	5.17364	7.00663e-170	1.14526e-168		NR_033532	B230206H07Rik	-1.61015	1.55459e-181	2.71577e-180
NM_010595	Kcna1	5.17142	1.45206e-09	3.85744e-09		NM_013900	Mfi2	-1.60582	1.31989e-135	1.77152e-134
NM_032398	Plvap	5.17047	2.77288e-170	4.54309e-169		NR_026688	Abhd11os	-1.60386	4.07548e-31	2.00937e-30
NM_177087	Fam179a	5.17004	4.39233e-31	2.16481e-30		NM_013490	Chka	-1.60355	9.4713e-205	1.90728e-203
NM_021351	Cryba4	5.16826	3.09556e-16	1.06238e-15		NM_001163749	Camsap3	-1.60306	4.04018e-176	6.82958e-175
NM_010750	Mab21l1	5.16261	6.77875e-50	4.38954e-49		NM_001301298	Gab1	-1.60291	1.30215e-278	3.70008e-277
NR_033261	Prr33	5.16246	4.79882e-30	2.31812e-29		NM_146257	Slc29a4	-1.60273	8.23665e-81	7.45553e-80
NM_008268	Hoxb5	5.15746	4.83668e-16	1.6495e-15		NM_009003	Rab4a	-1.60244	4.40341e-142	6.13001e-141
NM_172477	Dennd2a	5.15502	0	0		NM_001017955	Zscan18	-1.6016	7.47544e-11	2.10803e-10
NM_021492	Ap3b2	5.1505	1.54629e-09	4.10225e-09		NM_153413	Dock3	-1.59959	1.55354e-09	4.12109e-09
NM_053171	Csmd1	5.14559	2.27811e-24	9.76298e-24		NM_139305	Car9	-1.59744	3.79381e-60	2.77388e-59
NM_011261	Reln	5.14516	8.31449e-46	5.07093e-45		NM_008860	Prkcz	-1.59725	6.86052e-89	6.62577e-88
NR_040387	AI606473	5.14356	6.62235e-16	2.24741e-15		NM_001164557	Pdzk1ip1	-1.59717	2.14722e-50	1.39827e-49
NM_133903	Spon2	5.1413	2.21569e-51	1.46455e-50		NM_023663	Ripk4	-1.59709	1.49287e-204	3.00189e-203
NM_001277216	Bmpr1b	5.13288	4.48249e-64	3.41634e-63		NM_053096	Cml2	-1.59604	3.42842e-31	1.69245e-30
NM_008968	Ptgis	5.13267	6.76369e-111	7.74524e-110		NM_001286038	Klc3	-1.59489	4.10007e-270	1.11849e-268
NM_001167879	Gareml	5.12997	1.4583e-105	1.61387e-104		NM_130878	Cdhr1	-1.5933	5.30727e-73	4.48027e-72
NM_173731	Hmgcll1	5.12995	3.34898e-57	2.36375e-56		NM_001100460	Zbtb42	-1.59171	1.7679e-117	2.1237e-116
NM_021896	Gucy1a3	5.12791	8.43108e-97	8.71075e-96		NM_001083903	Sbsn	-1.59141	1.3882e-54	9.52137e-54
NM_010151	Nr2f1	5.12138	2.57744e-106	2.86614e-105		NM_009864	Cdh1	-1.59087	0	0
NM_028326	Zfp618	5.12084	4.57653e-58	3.26513e-57		NM_198960	Tfap2e	-1.59042	0.00592217	0.00998168
NM_001291482	Mdk	5.11886	0	0		NR_040331	E130215H24Rik	-1.58853	2.39651e-07	5.68807e-07
NM_009747	Bdkrb2	5.11815	1.94722e-21	7.75108e-21		NM_010623	Kif17	-1.5884	0.000162297	0.000317811
NM_001161775	Myh11	5.11571	2.12482e-71	1.76255e-70		NM_009335	Tfap2c	-1.58737	2.02225e-284	5.88172e-283
NM_178444	Egfl7	5.11385	4.08182e-176	6.89576e-175		NM_011143	Pou4f1	-1.5869	0.000907936	0.00165448
NM_001038654	Slc16a3	5.10922	6.69373e-273	1.85157e-271		NM_001289741	Mturn	-1.58562	1.6218e-65	1.25646e-64
NM_175481	Grik4	5.10882	2.23083e-09	5.88392e-09		NM_001177571	Ccdc162	-1.58457	0.00497696	0.00845286
NM_009252	Serpina3n	5.10486	0	0		NM_001252531	Slco2b1	-1.58256	0.000898899	0.00163909
NM_001286343	Bcl11b	5.10345	5.66162e-58	4.03098e-57		NM_146028	Stac2	-1.58245	2.05709e-303	6.4726e-302
NM_013599	Mmp9	5.0951	4.5309e-94	4.59714e-93		NM_181422	Pkd2l1	-1.58165	0.0046687	0.00795078
NM_016847	Avpr1a	5.09499	1.55703e-212	3.27602e-211		NM_010217	Ctgf	-1.58152	1.46391e-230	3.35548e-229
NM_001159383	Gjc1	5.09384	9.88215e-133	1.30547e-131		NR_030690	E330033B04Rik	-1.58036	0.000392571	0.000740557
NM_023734	Pi16	5.0902	6.73719e-81	6.10626e-80		NM_138674	Pkhd1l1	-1.57956	0.00971884	0.0159706
NM_001159582	Pde1a	5.08988	3.44317e-67	2.72862e-66		NM_172393	Aim1	-1.57948	0	0
NM_134072	Akr1c14	5.08846	3.59232e-09	9.36871e-09		NM_001171003	Mgam	-1.57911	9.38936e-236	2.20137e-234
NM_030704	Hspb8	5.08545	0	0		NM_001099276	Pik3c2b	-1.57679	6.51411e-109	7.37405e-108
NM_010276	Gem	5.08271	0	0		NM_028924	Tc2n	-1.57504	2.41507e-163	3.8038e-162
NR_045702	AW549542	5.08174	4.24786e-11	1.21094e-10		NM_001174047	Cacna2d2	-1.5732	1.9848e-06	4.44349e-06
NM_178685	Pcdh20	5.07936	2.21798e-15	7.41084e-15		NM_009950	Cradd	-1.57255	4.19103e-50	2.72407e-49
NM_007739	Col8a1	5.07769	0	0		NM_001099307	Gm7173	-1.57241	0.00307471	0.0053253
NM_026235	Larp6	5.0771	9.4184e-71	7.74535e-70		NM_011281	Rorc	-1.57229	4.6552e-139	6.37792e-138
NM_001080940	Gm6484	5.07526	1.45198e-42	8.48362e-42		NM_178763	Zfp750	-1.57209	8.81214e-181	1.5269e-179
NM_016697	Gpc3	5.06951	3.27674e-51	2.15971e-50		NM_025626	Fam107b	-1.57014	1.97736e-291	5.88722e-290
NM_001034874	Shisa6	5.06523	2.88381e-13	8.96081e-13		NM_009397	Tnfaip3	-1.56976	7.19071e-215	1.53393e-213
NM_010090	Dusp2	5.06434	2.01362e-15	6.73371e-15		NM_001013814	Amt	-1.56785	7.827e-69	6.31842e-68
NM_201353	Slc6a7	5.06332	2.93378e-11	8.43021e-11		NM_030175	Hhipl2	-1.5666	2.4974e-241	5.98705e-240
NM_033615	Adam33	5.06264	8.68604e-159	1.33467e-157		NM_010388	H2-DMb2	-1.56326	2.93492e-36	1.56671e-35
NM_026864	Rasl11a	5.05322	2.46596e-42	1.43808e-41		NM_144549	Trib1	-1.56035	0	0
NM_001142539	Gm9992	5.04916	5.70891e-09	1.4721e-08		NM_029586	Cep112	-1.55957	0.0014823	0.00264489
NM_008423	Kcnd1	5.04869	6.04669e-38	3.31801e-37		NM_133351	Prss8	-1.5583	5.78627e-112	6.67566e-111
NM_001190187	Nrg3	5.04801	4.04633e-13	1.25085e-12		NM_010153	Erbb3	-1.55822	8.20279e-139	1.12272e-137
NM_001080549	Hdx	5.04791	3.69567e-15	1.22506e-14		NM_001163689	Pnpla2	-1.55796	2.36907e-253	5.96337e-252
NM_178877	Slc9b2	5.04681	2.03805e-102	2.20436e-101		NM_025831	Pxdc1	-1.55538	2.17687e-117	2.61271e-116
NM_008570	Mcpt1	5.04419	2.5713e-17	9.13481e-17		NM_016851	Irf6	-1.55385	5.05897e-277	1.42791e-275
NM_001025074	Ntrk2	5.04402	8.91857e-158	1.36134e-156		NM_031376	Pik3ap1	-1.55235	2.21292e-204	4.44334e-203
NM_175499	Slitrk6	5.04282	2.65998e-18	9.71025e-18		NM_025750	4933417A18Rik	-1.55186	0.00190425	0.0033674
NM_009888	Cfh	5.03922	0	0		NM_001190449	Ddah2	-1.54925	5.92396e-250	1.46716e-248
NM_007731	Col13a1	5.0336	4.02224e-27	1.83268e-26		NM_011324	Scnn1a	-1.54925	1.54951e-22	6.33556e-22
NM_001171010	Slc14a1	5.03113	4.88726e-09	1.26553e-08		NM_001077687	Lrba	-1.54918	5.42688e-31	2.67185e-30
NM_001113180	Gria4	5.0311	1.10495e-39	6.21849e-39		NM_026547	Lurap1	-1.54737	6.31806e-48	3.96961e-47
NR_028434	AF357359	5.02423	5.92617e-09	1.5267e-08		NM_172469	Clic6	-1.54548	1.16934e-206	2.38423e-205
NM_001289546	Amph	5.02418	3.89119e-15	1.28879e-14		NM_001098799	Tox2	-1.54478	1.23913e-08	3.14081e-08
NM_007873	Doc2b	5.02072	2.73178e-51	1.80268e-50		NM_145973	Ell3	-1.54456	1.67517e-60	1.22806e-59
NM_001042725	Calcr	5.01657	6.07592e-11	1.72021e-10		NM_001005748	Phactr1	-1.54417	1.64682e-105	1.82104e-104
NM_001285472	Tbx1	5.01462	4.74717e-13	1.46342e-12		NM_001113416	Epb4.1l5	-1.54217	7.9366e-161	1.23182e-159
NM_012044	Pla2g2e	5.01411	3.09023e-127	3.93767e-126		NM_145512	Sft2d2	-1.5416	0	0
NM_022029	Nrgn	5.01292	3.60957e-14	1.15879e-13		NM_001164658	Catsperg1	-1.54088	2.0333e-06	4.54912e-06
NM_023653	Wnt2	5.00858	1.49042e-68	1.19896e-67		NM_001085508	Tmem8b	-1.5405	6.68815e-60	4.87723e-59
NM_198112	Ostn	5.00437	6.40279e-11	1.81034e-10		NM_007437	Aldh3a2	-1.53886	0	0
NM_028713	Rftn2	5.00176	0	0		NM_001045513	Raph1	-1.5384	1.2685e-167	2.05041e-166
NM_153565	Pcsk9	4.99763	7.61933e-11	2.14795e-10		NM_026385	Pllp	-1.53771	0.00307362	0.00532375
NM_146162	Tmem119	4.99606	0	0		NM_170671	Mycbpap	-1.537	4.3473e-18	1.58031e-17
NM_147221	Glis1	4.99151	1.2436e-28	5.85114e-28		NM_009601	Chrnb1	-1.53609	4.85602e-210	1.00869e-208
NM_031168	Il6	4.99099	1.85549e-51	1.22793e-50		NM_001081365	Cystm1	-1.53603	1.81636e-129	2.35015e-128
NM_153790	Scarf2	4.98967	0	0		NM_172868	Palm2	-1.53525	1.13681e-140	1.57307e-139
NM_015812	Rgs6	4.98275	9.77023e-11	2.74397e-10		NM_001110807	Capn12	-1.53499	1.93854e-237	4.57988e-236
NM_029928	Ptprb	4.98168	4.18925e-176	7.07294e-175		NR_102374	Dmr	-1.53395	0.000733577	0.0013491
NM_029525	Prex2	4.97432	1.26124e-120	1.5473e-119		NM_010387	H2-DMb1	-1.53171	2.27862e-45	1.38392e-44
NR_110482	C230029M16	4.97105	9.991e-09	2.54523e-08		NM_030021	Cutal	-1.53068	4.93434e-28	2.2978e-27
NM_183204	Rnf182	4.96894	4.71441e-22	1.90426e-21		NM_001165934	Rgs9	-1.52951	1.07245e-09	2.86576e-09
NM_010927	Nos2	4.96797	3.22702e-21	1.27702e-20		NM_007729	Col11a1	-1.52901	1.10124e-186	1.98517e-185
NM_175514	Fam171b	4.9609	6.24453e-76	5.41003e-75		NM_145142	Chst10	-1.52772	4.42349e-21	1.74451e-20
NM_008664	Myom2	4.95657	1.24517e-10	3.48258e-10		NM_021409	Pard6b	-1.52739	8.91682e-107	9.95155e-106
NM_028258	Dzip1l	4.95338	6.00471e-144	8.4142e-143		NM_023543	Chn2	-1.52629	5.3566e-18	1.94109e-17
NM_182806	Gpr18	4.95289	1.56786e-14	5.10136e-14		NM_007498	Atf3	-1.52512	2.37371e-74	2.02544e-73
NM_133859	Olfml3	4.95193	0	0		NM_010574	Irx2	-1.52452	0	0
NM_021316	Cend1	4.95172	1.62399e-12	4.91654e-12		NM_001286996	Gpr160	-1.52436	3.19858e-22	1.29766e-21
NM_053247	Lyve1	4.94395	1.57328e-12	4.76614e-12		NM_178705	Luzp2	-1.52397	8.62031e-07	1.97584e-06
NM_001290753	Ephb2	4.94083	0	0		NM_010277	Gfap	-1.52345	3.36557e-06	7.42367e-06
NM_026056	Cap2	4.93954	1.53655e-10	4.27721e-10		NR_078345	Gm21284	-1.52315	0.00205143	0.00361659
NM_029595	Pbp2	4.93772	3.48558e-18	1.26973e-17		NM_177686	Clec12a	-1.52192	2.27994e-06	5.08655e-06
NM_011611	Cd40	4.93701	0	0		NM_011449	Spa17	-1.52067	3.35796e-08	8.33441e-08
NM_183064	Fgf12	4.93255	2.6398e-16	9.07768e-16		NM_019686	Cib2	-1.52067	6.58916e-61	4.85103e-60
NM_019444	Ramp2	4.93189	1.67796e-08	4.22758e-08		NM_146071	Muc20	-1.51975	9.73314e-71	8.00181e-70
NM_001170853	Mndal	4.92983	2.44364e-23	1.01931e-22		NM_021887	Il21r	-1.51843	7.42858e-09	1.90419e-08
NM_011415	Snai2	4.92964	1.05668e-206	2.1577e-205		NM_133662	Ier3	-1.51747	0	0
NM_019790	Tmeff2	4.92595	3.94795e-16	1.34923e-15		NM_016907	Spint1	-1.51741	3.4967e-300	1.08543e-298
NM_011111	Serpinb2	4.92171	2.16553e-11	6.26032e-11		NM_008846	Pip5k1b	-1.51603	3.95077e-66	3.08845e-65
NM_008008	Fgf7	4.91706	1.40465e-186	2.52883e-185		NM_027728	Enkur	-1.51592	0.00119698	0.00215439
NM_023143	C1ra	4.91657	0	0		NM_153518	Ccdc65	-1.5126	1.36123e-08	3.44306e-08
NM_001039354	Lin7a	4.91353	4.82737e-55	3.3217e-54		NM_001141983	Golga7b	-1.51256	6.40486e-05	0.000129269
NM_001077361	Fhl1	4.91334	6.64894e-48	4.17466e-47		NM_008711	Nog	-1.51242	1.69158e-05	3.56427e-05
NM_010329	Pdpn	4.91128	0	0		NM_172884	2900026A02Rik	-1.51084	0	0
NM_133187	Fam198b	4.90786	0	0		NM_026947	Eci3	-1.50943	9.73057e-13	2.96925e-12
NM_010612	Kdr	4.90706	6.33471e-146	8.99958e-145		NM_021455	Mlxipl	-1.50663	5.16658e-14	1.64927e-13
NM_011060	Padi3	4.89571	2.15891e-23	9.01901e-23		NM_173029	Adcy10	-1.50651	0.000905629	0.00165049
NM_010669	Krt6b	4.89027	2.59713e-10	7.14121e-10		NM_001195048	Pak3	-1.50647	4.34092e-60	3.17223e-59
NM_183147	Sprn	4.8887	5.30139e-12	1.57247e-11		NM_009886	Celsr1	-1.50638	1.90673e-102	2.06312e-101
NR_033521	Tpsab1	4.88829	8.40732e-81	7.60752e-80		NM_010145	Ephx1	-1.50569	1.65913e-293	4.96645e-292
NM_001205311	Slc12a3	4.88811	3.30604e-92	3.30472e-91		NM_172448	Rnf43	-1.50435	8.43273e-108	9.49162e-107
NM_001276676	Syt6	4.88771	1.21417e-148	1.75557e-147		NM_001289738	6820408C15Rik	-1.50414	0.0153765	0.0245211
NM_007884	Epyc	4.88715	2.96984e-10	8.15064e-10		NM_054056	Pawr	-1.50296	3.9351e-132	5.17866e-131
NM_026058	Cers4	4.88704	1.00243e-96	1.03491e-95		NM_018857	Msln	-1.50235	0.000740096	0.00136009
NR_110420	Ptgs2os2	4.86931	1.82723e-23	7.64495e-23		NM_130796	Snx18	-1.50194	6.28197e-267	1.68548e-265
NM_177304	Enpp6	4.8681	2.6031e-08	6.49228e-08		NM_001291245	Lig3	-1.50059	1.14674e-293	3.43637e-292
NM_170593	Disp2	4.86668	2.76259e-23	1.15079e-22		NM_145070	Hip1r	-1.49934	2.7941e-259	7.25079e-258
NM_018779	Pde3a	4.8645	1.5766e-135	2.11402e-134		NM_019477	Acsl4	-1.49814	5.84964e-255	1.48189e-253
NM_028325	Zcchc12	4.85975	1.97598e-17	7.03524e-17		NR_033529	Gm7444	-1.49754	0.0122032	0.0197657
NM_001033346	Lrrc55	4.85909	1.42939e-33	7.31982e-33		NR_040266	2310001H17Rik	-1.49749	1.36803e-10	3.81809e-10
NM_148938	Slc1a3	4.8585	2.26058e-54	1.54704e-53		NM_172520	Arhgef19	-1.49602	5.86095e-209	1.20837e-207
NM_016671	Il27ra	4.8581	4.89575e-65	3.77706e-64		NR_030701	Gm20554	-1.49557	1.17061e-205	2.37111e-204
NM_028295	Pdia5	4.85702	0	0		NM_026720	Ankrd13d	-1.49506	6.45572e-25	2.80045e-24
NM_182991	Tmem59l	4.85636	9.29587e-39	5.16543e-38		NM_001034851	Fam134b	-1.49463	3.94597e-199	7.70522e-198
NM_001077410	Gimap8	4.8556	4.83372e-63	3.64789e-62		NM_027366	Ly6g6e	-1.49462	6.17808e-13	1.89777e-12
NM_001031811	Kcnh8	4.85378	2.53449e-08	6.32344e-08		NM_146040	Cdca7l	-1.49442	5.33705e-76	4.62817e-75
NM_177469	Gpr123	4.85128	4.94807e-203	9.84953e-202		NM_021895	Actn4	-1.49373	0	0
NM_007413	Adora2b	4.84879	1.53261e-75	1.32242e-74		NM_016928	Tlr5	-1.49196	2.53781e-54	1.73462e-53
NM_001177319	Tfpi	4.84808	0	0		NM_001291149	Ptprt	-1.49127	0.00236706	0.00414766
NM_001111274	Igf1	4.84335	0	0		NM_009657	Aldoc	-1.4909	1.83223e-206	3.73308e-205
NM_029967	Adamtsl1	4.84145	2.50561e-79	2.24524e-78		NM_138313	Bmf	-1.49027	3.66881e-139	5.03148e-138
NM_201239	Rnase4	4.83794	0	0		NM_027881	Osbpl3	-1.48912	1.24556e-256	3.18453e-255
NM_008608	Mmp14	4.83746	0	0		NM_008491	Lcn2	-1.48853	0	0
NM_175730	Hoxc5	4.83466	1.62437e-33	8.31372e-33		NM_172546	Cnksr3	-1.48513	3.06514e-85	2.87113e-84
NM_025896	Prl3a1	4.83026	1.86159e-13	5.82173e-13		NM_181820	Tmc4	-1.48473	0	0
NM_032393	Map1a	4.82784	0	0		NM_172612	Rnd1	-1.48396	7.22847e-20	2.74478e-19
NM_001291166	Apba2	4.82694	3.12735e-17	1.10875e-16		NM_016887	Cldn7	-1.48219	0	0
NM_010317	Gng4	4.82566	4.66266e-10	1.26499e-09		NM_008939	Prss12	-1.48128	2.85787e-126	3.62158e-125
NM_172855	Galnt5	4.82433	2.89916e-22	1.17757e-21		NM_029338	Rsph9	-1.48117	4.11916e-12	1.2264e-11
NR_033803	6030408B16Rik	4.82219	7.3252e-30	3.52621e-29		NM_028584	Marveld3	-1.48015	5.93801e-120	7.24626e-119
NM_027852	Rarres2	4.82089	4.10883e-48	2.58802e-47		NM_133778	Fam131a	-1.47918	4.7592e-47	2.95465e-46
NM_201518	Flrt2	4.8206	0	0		NM_011023	Otx1	-1.47633	1.42421e-05	3.01814e-05
NM_029620	Pcolce2	4.82037	1.54681e-84	1.44354e-83		NM_013915	Zbtb18	-1.47632	6.45734e-237	1.52168e-235
NM_010279	Gfra1	4.8195	1.28978e-205	2.60678e-204		NM_008883	Plxna3	-1.47551	1.42926e-165	2.27833e-164
NM_172604	Scara3	4.8108	0	0		NM_177809	Slc25a48	-1.4755	8.23002e-34	4.22315e-33
NM_009514	Vpreb3	4.81014	4.27423e-08	1.05518e-07		NM_011437	Sox10	-1.47539	0	0
NM_001163664	Tnnt3	4.79945	1.24183e-11	3.63708e-11		NM_001112744	Arhgef16	-1.47508	8.75941e-154	1.31315e-152
NM_001039485	Piezo2	4.79698	0	0		NM_011586	Myo18a	-1.47281	3.72803e-273	1.03329e-271
NM_009251	Serpina3g	4.79611	3.73604e-212	7.84285e-211		NM_021468	Unc13b	-1.47251	2.10932e-220	4.61335e-219
NM_019471	Mmp10	4.79052	2.23522e-149	3.24887e-148		NM_001005370	Spin2c	-1.47171	3.59207e-15	1.191e-14
NM_001007220	Adam22	4.78826	1.07143e-22	4.39836e-22		NM_001190400	Bend7	-1.47128	3.02135e-66	2.36791e-65
NM_027102	Esam	4.78178	1.0567e-185	1.89378e-184		NM_010060	Dnah11	-1.47093	1.80866e-37	9.8447e-37
NM_172793	Btnl9	4.77966	1.36511e-19	5.1595e-19		NM_027988	Noxo1	-1.46893	4.68567e-129	6.04011e-128
NM_010770	Matn3	4.77882	9.7232e-10	2.60348e-09		NR_040437	Kank4os	-1.46745	0.00477835	0.00812811
NM_001289550	Tgfb1i1	4.77157	0	0		NM_145608	BC021891	-1.46601	4.5174e-88	4.34314e-87
NM_001163145	1810041L15Rik	4.76482	2.39783e-18	8.76252e-18		NM_001081047	Cnksr1	-1.46525	9.42294e-72	7.87064e-71
NM_001113356	C1rb	4.76449	6.49291e-21	2.54829e-20		NM_023908	Slco3a1	-1.46465	9.35544e-228	2.11809e-226
NM_174985	Gpbar1	4.75362	4.91862e-13	1.51526e-12		NM_145447	Mfsd7c	-1.4644	3.05018e-37	1.65568e-36
NR_002863	Emx2os	4.74676	2.70871e-14	8.73838e-14		NM_009516	Wee1	-1.46229	1.07623e-98	1.13221e-97
NM_177618	Wscd1	4.74635	8.70174e-42	5.02277e-41		NR_033571	1810062O18Rik	-1.46082	3.21825e-25	1.40552e-24
NM_001291801	Drd1a	4.74317	1.64971e-21	6.57721e-21		NM_028013	Endod1	-1.46011	0	0
NM_009047	Rem1	4.73657	7.24281e-62	5.39974e-61		NM_020610	Nrip3	-1.46	0.000252828	0.000485408
NM_172955	Vcan	4.73613	0	0		NM_001289785	Cryab	-1.45985	1.00483e-87	9.63387e-87
NM_001291225	Sez6	4.7357	4.68405e-21	1.84595e-20		NR_033455	Gm10536	-1.45892	0.0100624	0.016498
NR_040624	D030045P18Rik	4.73553	2.64145e-18	9.64388e-18		NM_153417	Trpm6	-1.45825	1.07894e-98	1.13463e-97
NM_001253355	Hs3st5	4.7325	1.57619e-09	4.18037e-09		NM_001195413	Cngb1	-1.45737	6.79012e-19	2.52398e-18
NM_177293	Mtap7d3	4.72911	2.03641e-09	5.37831e-09		NM_178118	Dixdc1	-1.45729	1.55162e-105	1.71645e-104
NM_031396	Cnnm1	4.72821	2.88254e-14	9.29048e-14		NM_201601	Fgfr2	-1.45553	2.99426e-45	1.81378e-44
NM_178887	Fibcd1	4.72598	8.17395e-08	1.99163e-07		NM_001033550	Lrrc8b	-1.45455	8.30989e-114	9.68403e-113
NM_025730	Lrrk2	4.72576	0	0		NM_026163	Pkp2	-1.45356	1.82209e-150	2.67223e-149
NM_001024707	Lrp3	4.72531	6.60986e-223	1.46182e-221		NM_007865	Dll1	-1.45165	2.75273e-125	3.46613e-124
NM_001030289	Mmp27	4.72478	1.42383e-55	9.86103e-55		NM_001159485	Mcf2l	-1.44996	3.49012e-78	3.09638e-77
NM_013912	Apln	4.71091	1.35777e-137	1.85198e-136		NM_001113556	A530064D06Rik	-1.44966	0.0143065	0.0229217
NM_172845	Adamts4	4.70883	0	0		NM_178888	Garnl3	-1.4496	2.23091e-38	1.23125e-37
NM_001256263	3110082J24Rik	4.70621	9.42304e-08	2.28552e-07		NM_023456	Npy	-1.4492	4.17633e-15	1.38241e-14
NM_001038701	Gabrb3	4.70611	4.40089e-12	1.30873e-11		NM_028430	Ppil6	-1.44749	5.67465e-07	1.31541e-06
NM_008984	Ptprm	4.702	0	0		NM_178789	Tmem117	-1.44721	1.15194e-46	7.10062e-46
NM_001033356	Ntn5	4.69721	4.16549e-11	1.18807e-10		NM_201362	Ccdc68	-1.44613	4.30543e-54	2.93051e-53
NM_010571	Irs3	4.6919	1.21102e-12	3.68524e-12		NM_001272055	Numb	-1.44463	6.90656e-185	1.23219e-183
NM_028279	Naalad2	4.69169	7.63653e-148	1.09559e-146		NM_011950	Mapk13	-1.4432	2.15383e-169	3.51843e-168
NM_007409	Adh1	4.68638	1.60532e-34	8.31456e-34		NM_028696	Nabp1	-1.44151	2.95673e-148	4.25514e-147
NM_001293561	Unc5c	4.6846	0	0		NM_029584	Zfp773	-1.441	1.65975e-09	4.39905e-09
NM_009506	Vegfc	4.68278	0	0		NM_015755	Hunk	-1.44045	2.96514e-24	1.26798e-23
NR_028578	Gm10584	4.67854	2.538e-14	8.20009e-14		NR_045314	9830166K06Rik	-1.43944	0.0167627	0.0265968
NM_007426	Angpt2	4.67731	1.09151e-94	1.11359e-93		NM_011909	Usp18	-1.43879	1.28679e-15	4.32874e-15
NM_001201367	Tmem200b	4.67179	1.59216e-69	1.29282e-68		NM_029296	1700001C19Rik	-1.43726	1.61652e-16	5.60268e-16
NM_001289509	Tfr2	4.67116	1.99691e-33	1.0211e-32		NM_001162485	Arrdc1	-1.43658	7.76377e-163	1.21866e-161
NR_033499	Gm8773	4.66966	3.92879e-09	1.0226e-08		NM_080454	Gjc2	-1.43601	0.000560358	0.00104077
NM_028979	Cyp2j9	4.66938	3.75602e-14	1.20483e-13		NM_001145895	1700019G17Rik	-1.43492	5.07219e-26	2.2634e-25
NM_001190466	Dact1	4.66929	0	0		NM_001008424	Cdsn	-1.43241	9.87962e-15	3.23621e-14
NM_001001883	Hecw2	4.66654	1.24397e-90	1.21669e-89		NM_178701	Lrrc8d	-1.43129	6.65022e-184	1.17961e-182
NM_011030	P4ha1	4.66001	2.99199e-293	8.93693e-292		NM_027948	1700003E16Rik	-1.43108	7.28021e-15	2.39351e-14
NR_102303	A330033J07Rik	4.65799	8.69303e-16	2.9404e-15		NM_001282945	Adora1	-1.42974	7.77203e-98	8.11156e-97
NM_010262	Gbx2	4.6576	1.53112e-12	4.6425e-12		NM_153081	Slc16a11	-1.42877	0.0019987	0.00352743
NM_001126331	Trp73	4.65407	1.56819e-12	4.7528e-12		NM_028995	Nipal3	-1.42808	1.21379e-88	1.17103e-87
NM_175271	Lpar4	4.65234	8.24925e-100	8.77501e-99		NM_133867	Eps8l3	-1.42764	3.27015e-40	1.85282e-39
NR_045894	Gm13446	4.64938	3.21964e-25	1.40591e-24		NM_010357	Gsta4	-1.42763	8.40895e-116	9.93325e-115
NM_145467	Itgbl1	4.6466	2.37902e-187	4.30541e-186		NR_105041	LOC101056149	-1.42715	1.173e-05	2.50033e-05
NM_008926	Prkg2	4.64448	5.4043e-226	1.21362e-224		NM_009899	Clca1	-1.42689	1.09583e-07	2.6486e-07
NM_008161	Gpx3	4.64212	0	0		NM_181404	Kank1	-1.42678	1.99134e-165	3.17068e-164
NM_001170913	Trim66	4.63811	1.2984e-75	1.12103e-74		NR_046184	4930447K03Rik	-1.42657	0.00290945	0.00505203
NM_001011874	Xkr4	4.63276	4.95399e-17	1.74518e-16		NR_045596	Smim22	-1.42655	8.93344e-45	5.36568e-44
NM_001033450	Mnda	4.63159	2.6188e-65	2.02491e-64		NM_001081142	Kcnq4	-1.42538	1.06022e-07	2.56478e-07
NM_013879	Cabp1	4.62556	7.15161e-28	3.31582e-27		NM_001146708	Fas	-1.4244	1.86931e-15	6.25642e-15
NM_177906	Opcml	4.62388	1.23362e-10	3.45062e-10		NM_133816	Sh3bp4	-1.42335	6.39114e-254	1.6117e-252
NM_010795	Mgat3	4.62094	0	0		NM_033073	Krt7	-1.42289	0	0
NM_001081428	Fam184a	4.61984	6.79385e-09	1.74536e-08		NM_027219	Cdc42ep1	-1.42155	1.70545e-248	4.20874e-247
NM_130880	Otud7a	4.61785	1.529e-37	8.3323e-37		NM_011976	Sema4g	-1.42129	2.47143e-34	1.27671e-33
NM_010514	Igf2	4.60791	5.10126e-15	1.68374e-14		NM_019427	Epb4.1l4b	-1.42126	8.8152e-177	1.49837e-175
NM_181273	Heph	4.60741	4.4832e-156	6.76119e-155		NM_027040	1700007K13Rik	-1.42118	0.000668224	0.00123317
NM_020265	Dkk2	4.60264	1.40757e-16	4.88582e-16		NM_016899	Rab25	-1.42113	2.48352e-141	3.44865e-140
NM_013743	Pdk4	4.60136	1.23361e-87	1.1807e-86		NM_177664	Lppr4	-1.42046	6.34631e-17	2.22772e-16
NM_001081020	Adamts6	4.59911	1.75138e-246	4.27635e-245		NM_001163256	Fblim1	-1.41946	0	0
NM_001287386	Gck	4.593	2.5381e-10	6.98307e-10		NM_026102	Daam1	-1.41877	2.61532e-207	5.35619e-206
NM_139293	Ece2	4.59004	9.3066e-36	4.92151e-35		NM_178907	Mapkapk3	-1.41834	1.06327e-150	1.56267e-149
NM_001004182	Tmem178b	4.57929	1.95925e-10	5.42009e-10		NM_001277970	Itga6	-1.41785	1.28053e-189	2.35435e-188
NM_172463	Sned1	4.57892	0	0		NM_001024624	Cdkl5	-1.41692	1.18477e-40	6.74168e-40
NM_001162965	Sgsm1	4.57438	9.40168e-23	3.86638e-22		NR_045069	Gm16576	-1.41566	2.57576e-13	8.01532e-13
NM_001097621	Kif26a	4.57255	2.33868e-68	1.87861e-67		NM_001162366	Ptk2b	-1.41356	3.06154e-141	4.24917e-140
NM_001085501	Ppp1r3d	4.57226	2.404e-70	1.96878e-69		NM_177013	Tmem229a	-1.41288	3.14764e-08	7.82573e-08
NM_001199940	Serpina3i	4.5716	0	0		NM_001077595	Shroom3	-1.41224	2.19763e-222	4.84863e-221
NM_001083125	Lhx6	4.56524	5.60587e-16	1.90783e-15		NM_007752	Cp	-1.41136	3.66592e-243	8.83426e-242
NM_001290702	Tenm2	4.55771	2.79751e-30	1.35705e-29		NM_009743	Bcl2l1	-1.4102	4.29549e-244	1.04423e-242
NM_053178	Acsbg1	4.54982	7.65989e-211	1.5947e-209		NM_001143683	Mpped2	-1.40997	1.02487e-21	4.1026e-21
NM_001122758	Pcdh7	4.54171	0	0		NM_010304	Gna15	-1.40991	3.20695e-26	1.43801e-25
NM_001281845	Anxa8	4.53607	0	0		NM_183276	Nbeal2	-1.4096	5.95451e-119	7.21551e-118
NM_146140	Tram1l1	4.5331	6.25406e-14	1.98884e-13		NM_007704	Inadl	-1.40956	2.14989e-152	3.19529e-151
NM_172621	Clic5	4.53159	3.09741e-28	1.44945e-27		NM_001289677	Pacsin3	-1.40775	9.52523e-177	1.61806e-175
NM_001081135	Prrg3	4.53083	9.27107e-64	7.05044e-63		NR_033642	Gm3230	-1.40764	0.00885249	0.0146246
NM_001199154	Sncaip	4.52853	8.4361e-29	3.98613e-28		NM_008940	Klk8	-1.40758	5.583e-43	3.27517e-42
NM_001081139	Ankrd35	4.52841	1.30683e-20	5.08069e-20		NM_001005420	Ppp1r26	-1.406	6.77732e-65	5.21704e-64
NM_010791	Meox1	4.52561	1.16027e-09	3.09684e-09		NM_172414	Zc2hc1c	-1.40562	1.01165e-19	3.83145e-19
NM_001290308	Col12a1	4.52277	0	0		NM_001039515	Arl4a	-1.40342	1.2435e-94	1.26818e-93
NM_015770	a	4.51997	1.51977e-08	3.83669e-08		NM_028943	Sgms2	-1.40268	2.09931e-81	1.91084e-80
NM_009598	Ace	4.51323	0	0		NM_008317	Hyal1	-1.40235	1.00408e-40	5.71819e-40
NM_001033228	Itga1	4.51319	0	0		NR_106019	Mir7052	-1.40165	3.35205e-07	7.88372e-07
NM_172800	Sdk2	4.51291	1.8344e-54	1.256e-53		NM_011945	Map3k1	-1.40145	2.11084e-94	2.14721e-93
NM_011427	Snai1	4.50914	0	0		NM_009944	Cox7a1	-1.39981	6.08241e-16	2.06874e-15
NM_001029873	Unc13a	4.50877	1.23989e-73	1.05118e-72		NM_178727	D630039A03Rik	-1.39732	1.577e-10	4.3863e-10
NM_001113379	Lrrc32	4.50874	0	0		NM_019764	Amotl2	-1.39725	2.32623e-187	4.21263e-186
NM_009390	Tll1	4.50373	1.68116e-20	6.51316e-20		NM_001168679	Tspan8	-1.39709	1.49157e-149	2.17254e-148
NM_001033248	Gm266	4.50211	9.30981e-16	3.14749e-15		NM_033149	B3galt5	-1.39617	4.92059e-09	1.27381e-08
NM_001145198	1500009L16Rik	4.50038	1.76298e-14	5.72209e-14		NM_011303	Dhrs3	-1.39524	4.13051e-117	4.94251e-116
NM_008867	Pla2r1	4.49392	2.69877e-74	2.3021e-73		NM_033606	Dqx1	-1.3952	8.54988e-21	3.34423e-20
NM_001195540	Dclk1	4.49199	0	0		NM_019730	Nme3	-1.39428	1.88476e-94	1.91935e-93
NM_182841	Tmem150c	4.49121	5.36728e-10	1.45202e-09		NM_001282993	Cobl	-1.39385	3.63875e-178	6.2386e-177
NM_001291809	Dsc3	4.48867	2.025e-11	5.86323e-11		NM_001145832	Kifc3	-1.39281	9.05266e-217	1.94309e-215
NM_011377	Sim2	4.48245	2.2294e-08	5.57985e-08		NM_026037	Mboat2	-1.3916	1.93074e-94	1.96545e-93
NM_018782	Calcrl	4.4751	0	0		NM_001145800	Igsf9	-1.39101	3.6849e-68	2.94973e-67
NM_010242	Fut4	4.47496	5.60978e-177	9.55284e-176		NM_001287093	Amigo1	-1.38999	8.58413e-24	3.62105e-23
NM_007975	F2rl3	4.47028	1.09343e-86	1.03579e-85		NM_001159624	Rnpep	-1.38845	3.01893e-191	5.58017e-190
NM_001012324	Ecm2	4.46864	4.80899e-32	2.40789e-31		NM_028798	Crct1	-1.38671	0.00279413	0.00486063
NM_080466	Kcnn3	4.46796	5.02226e-40	2.84088e-39		NM_001290651	Scml2	-1.3864	3.71539e-07	8.71013e-07
NM_138305	Adcy3	4.46741	0	0		NM_019550	Ptbp2	-1.38608	1.72509e-87	1.64824e-86
NM_178711	Plscr4	4.46688	4.39502e-125	5.5265e-124		NR_040558	4933439K11Rik	-1.38496	0.0131853	0.0212619
NM_177236	Atp2b3	4.46536	1.61327e-29	7.71768e-29		NM_001164427	Kcnk13	-1.38427	3.23447e-05	6.67159e-05
NM_007562	Bnc1	4.46122	4.92598e-158	7.53983e-157		NM_001290789	Shroom1	-1.38245	6.47567e-99	6.82806e-98
NR_028313	4833422C13Rik	4.45844	2.01272e-71	1.67107e-70		NM_001199284	Slc43a2	-1.38176	5.82073e-175	9.78569e-174
NM_001038614	Olfm1	4.45835	1.1233e-28	5.29145e-28		NM_013505	Dsc2	-1.38048	6.15445e-90	5.97932e-89
NR_033450	Serpina3h	4.45593	0	0		NM_001081070	Pdia2	-1.38027	0.0226148	0.0352838
NM_010875	Ncam1	4.45492	0	0		NM_174870	Slc26a1	-1.37945	0.00299204	0.0051883
NM_001081650	Rgs3	4.45434	3.38549e-105	3.73916e-104		NM_176848	Fbxo2	-1.37847	4.23717e-12	1.26099e-11
NM_017394	Slc7a10	4.45046	1.88721e-15	6.31327e-15		NM_001136117	C2cd4d	-1.37813	5.48382e-08	1.34719e-07
NM_001034863	Tmem136	4.4498	6.15901e-64	4.69152e-63		NM_019724	Mmp16	-1.37782	8.74948e-22	3.51006e-21
NM_133237	Apcdd1	4.4492	0	0		NM_010573	Irx1	-1.37682	0	0
NM_008584	Meox2	4.44815	5.21803e-38	2.86557e-37		NM_008152	Gpr65	-1.37604	2.16998e-05	4.53947e-05
NM_178717	Rxfp3	4.44302	1.21354e-12	3.69251e-12		NM_001100462	Tmem221	-1.3754	7.87178e-12	2.32294e-11
NM_029879	Rgs7bp	4.43776	1.35616e-12	4.1201e-12		NM_027225	Cobll1	-1.3746	1.64794e-153	2.46514e-152
NM_025943	Dzip1	4.43622	2.39295e-110	2.73343e-109		NM_027950	Osgin1	-1.37436	8.81028e-46	5.37212e-45
NM_030733	Gpr63	4.43489	4.67098e-14	1.49434e-13		NM_009769	Klf5	-1.37428	3.52848e-61	2.60464e-60
NM_001081192	Hcn4	4.42618	3.09482e-10	8.48272e-10		NM_080575	Acss1	-1.37362	3.74184e-90	3.65073e-89
NM_010181	Fbn2	4.42462	1.10902e-163	1.74973e-162		NM_013855	Abca3	-1.37329	2.81406e-256	7.18804e-255
NM_001168346	Nfatc4	4.42281	0	0		NM_001251881	Ggnbp1	-1.37273	1.23948e-14	4.0462e-14
NM_010564	Inha	4.41613	8.9755e-48	5.62395e-47		NM_009741	Bcl2	-1.37257	1.53005e-172	2.53991e-171
NM_134090	Kdelr3	4.4142	0	0		NM_145890	Grhl1	-1.37243	1.37559e-102	1.49192e-101
NR_029465	Gm11149	4.40793	4.10196e-177	6.9938e-176		NM_027528	Nos1ap	-1.37183	2.20535e-38	1.21738e-37
NM_172471	Itih5	4.40778	1.80163e-214	3.83143e-213		NM_001271599	Sort1	-1.37164	2.97129e-232	6.86172e-231
NM_001081277	Ak5	4.40077	1.22422e-56	8.58816e-56		NM_181529	Syt15	-1.3713	0.00131462	0.00235785
NR_104047	Gm11651	4.39866	0	0		NM_008504	Gzmm	-1.37121	7.25397e-05	0.00014579
NM_023048	Asb4	4.3932	1.80799e-09	4.7846e-09		NM_145535	Sdcbp2	-1.3697	1.20986e-32	6.112e-32
NM_009062	Rgs4	4.39141	1.17581e-83	1.09032e-82		NM_031393	Sytl1	-1.36848	1.22031e-128	1.57013e-127
NM_172053	Adamts16	4.39094	5.57055e-32	2.78568e-31		NM_172676	Samd10	-1.36624	2.84727e-68	2.28384e-67
NM_013811	Dnah8	4.38997	2.48564e-11	7.16777e-11		NM_008340	Igfals	-1.36584	6.80421e-90	6.60596e-89
NM_029935	Chst15	4.3883	4.95572e-183	8.75121e-182		NM_001161844	Cblc	-1.36541	9.08959e-98	9.46884e-97
NM_001161731	Ang	4.38265	2.21017e-146	3.14316e-145		NM_001025597	Ikzf1	-1.3626	7.91115e-60	5.76452e-59
NM_001164763	Rarres1	4.37424	4.87274e-42	2.82735e-41		NM_026599	Cgnl1	-1.3614	7.72488e-301	2.40331e-299
NR_045570	B4galt2	4.37391	0	0		NR_105886	Mir6921	-1.36097	1.61402e-08	4.06981e-08
NM_026840	Pdgfrl	4.36719	0	0		NM_007921	Elf3	-1.35844	2.46496e-58	1.76499e-57
NM_138648	Olr1	4.36352	0	0		NM_001195084	Plscr2	-1.3583	8.76414e-77	7.65039e-76
NM_177900	Hapln4	4.36345	5.62649e-42	3.25788e-41		NM_178928	Afap1l1	-1.35824	1.51e-47	9.42314e-47
NM_010426	Foxf1	4.36152	2.2287e-13	6.95018e-13		NM_001286158	Mllt3	-1.35634	1.7927e-91	1.77978e-90
NM_001164528	Ildr2	4.35627	3.01472e-42	1.75625e-41		NR_027851	2900005J15Rik	-1.35509	1.9001e-08	4.77336e-08
NR_040449	Gm10007	4.34952	5.15794e-09	1.33413e-08		NM_001195284	Fsd1l	-1.35434	4.383e-31	2.1606e-30
NM_030598	Rcan2	4.34302	5.66725e-36	3.0096e-35		NM_172964	Arhgap28	-1.35395	2.92242e-84	2.71997e-83
NM_144879	Vash2	4.3409	2.96337e-162	4.63313e-161		NM_028709	Btbd11	-1.35339	4.97072e-49	3.16911e-48
NR_105866	Mir6901	4.34029	1.85394e-10	5.13647e-10		NM_199015	Phf11d	-1.3518	9.04606e-26	4.0134e-25
NM_011435	Sod3	4.34011	2.19577e-150	3.21857e-149		NM_030004	Cryl1	-1.35151	7.22714e-70	5.88912e-69
NM_021509	Moxd1	4.33857	0	0		NM_144552	Stxbp6	-1.3504	1.08626e-93	1.10094e-92
NM_001037127	Musk	4.33241	1.81953e-10	5.04314e-10		NM_001109975	Synpo	-1.34896	6.42988e-132	8.44578e-131
NM_001029985	Kcp	4.33149	4.48765e-112	5.18608e-111		NM_145562	Parm1	-1.34835	5.32411e-127	6.77167e-126
NM_001110203	Trim9	4.32522	1.19349e-15	4.02076e-15		NM_001034895	Zfr2	-1.34818	8.7712e-28	4.06266e-27
NM_023612	Esm1	4.31671	1.35927e-07	3.26795e-07		NM_001177897	9830107B12Rik	-1.34607	0.025436	0.0393858
NM_001271859	Add2	4.30639	7.0937e-58	5.04411e-57		NM_011539	Tbxas1	-1.34606	7.67741e-11	2.16344e-10
NM_147093	Olfr558	4.30556	1.14836e-07	2.77314e-07		NM_133667	Pdk2	-1.34301	2.69473e-129	3.47528e-128
NM_027878	Dram1	4.30496	0	0		NM_145598	Nxnl1	-1.34294	0.0253205	0.0392201
NM_001177883	Elavl2	4.29787	2.14526e-11	6.20367e-11		NM_011948	Map3k4	-1.34219	4.29159e-145	6.06893e-144
NM_008088	Gas7	4.2957	0	0		NM_026821	Lurap1l	-1.34168	3.99634e-252	1.00049e-250
NM_130449	Colec12	4.29358	0	0		NM_027445	Rnf167	-1.34152	1.26014e-130	1.64352e-129
NM_198649	Ablim3	4.29066	5.10093e-10	1.38132e-09		NM_001256059	Ccdc149	-1.34114	1.82127e-59	1.3236e-58
NM_008013	Fgl2	4.29064	4.63633e-298	1.42008e-296		NM_175207	Ankrd9	-1.34112	1.53372e-37	8.35641e-37
NM_177282	Mical2	4.27414	0	0		NR_040511	9230102O04Rik	-1.34049	7.45423e-21	2.92227e-20
NM_007662	Cdh15	4.27123	7.20061e-10	1.93627e-09		NM_175528	E330009J07Rik	-1.33943	8.10187e-52	5.37839e-51
NM_016687	Sfrp4	4.27093	1.19609e-12	3.64101e-12		NM_145840	Rgs9bp	-1.33902	0.00757062	0.0126013
NM_009626	Adh7	4.27028	6.27531e-49	3.98983e-48		NM_001198985	Tjp2	-1.33853	9.90441e-276	2.77855e-274
NM_177814	Erc2	4.26711	1.52857e-07	3.66478e-07		NM_001002012	Hspa2	-1.33763	3.72447e-104	4.081e-103
NM_001172055	Bdh2	4.26702	1.68792e-81	1.5379e-80		NM_001163616	1810011H11Rik	-1.33726	2.45575e-06	5.46031e-06
NM_009793	Camk4	4.2646	6.25124e-19	2.3243e-18		NM_008698	Nipsnap1	-1.33627	1.3269e-107	1.4923e-106
NM_033652	Lmx1a	4.26369	1.03767e-08	2.64032e-08		NR_046275	C130021I20Rik	-1.33241	2.16427e-26	9.74729e-26
NM_029993	Mlana	4.26269	7.86932e-21	3.08195e-20		NM_183259	Smim5	-1.33231	0.000418828	0.000787354
NM_022320	Gpr35	4.26234	1.17807e-272	3.24572e-271		NR_015475	1700086O06Rik	-1.33142	2.46034e-23	1.02612e-22
NM_029627	Ly6k	4.26174	8.40433e-19	3.11231e-18		NM_008593	Foxd2	-1.32982	5.95043e-06	1.29397e-05
NM_011458	Serpina3k	4.25955	2.51653e-07	5.96374e-07		NR_029761	Mir328	-1.32936	6.81398e-09	1.75037e-08
NM_026772	Cdc42ep2	4.25881	1.93894e-181	3.37868e-180		NM_016845	Acrbp	-1.32896	3.70645e-11	1.05922e-10
NM_027280	Nkd1	4.25665	2.90337e-170	4.75407e-169		NM_009199	Slc1a1	-1.32792	5.27478e-90	5.13008e-89
NR_040556	Gm6634	4.25281	4.52502e-20	1.72699e-19		NM_030717	Lactb	-1.32766	3.5521e-66	2.77994e-65
NM_053123	Smarca1	4.25174	1.37274e-61	1.01985e-60		NM_010585	Itpr1	-1.32579	2.24544e-191	4.15602e-190
NM_009063	Rgs5	4.25107	3.63904e-53	2.45042e-52		NM_010215	Il4i1	-1.32526	1.50468e-17	5.38212e-17
NM_145365	Creb3l3	4.24873	1.13387e-23	4.76415e-23		NM_172584	Itpk1	-1.32032	4.53438e-102	4.89102e-101
NM_177741	Ppp1r3b	4.24825	1.77669e-224	3.94821e-223		NM_001039000	Kif5a	-1.32	3.5264e-24	1.50451e-23
NM_001271483	Clip4	4.24783	1.04982e-171	1.73751e-170		NM_008738	Nrtn	-1.31888	9.92042e-31	4.85655e-30
NM_009518	Wnt10a	4.24666	5.09866e-11	1.44945e-10		NM_172743	Plekha7	-1.31845	1.3016e-77	1.14887e-76
NM_010096	Ebf3	4.24302	7.21854e-39	4.01838e-38		NM_029341	Capsl	-1.31684	1.66617e-17	5.94976e-17
NM_028708	Jakmip3	4.24189	5.80994e-07	1.34598e-06		NM_153074	Lrrc25	-1.3164	3.10493e-05	6.41442e-05
NM_028790	Acot12	4.22135	9.96301e-40	5.60931e-39		NM_001039073	Ldb3	-1.31623	1.65253e-31	8.20606e-31
NR_121629	Slc6a17	4.21616	9.38608e-101	1.00305e-99		NM_133776	Gpr110	-1.31576	0.000982692	0.00178366
NM_023617	Aox3	4.21473	2.49213e-07	5.90894e-07		NM_007725	Cnn2	-1.31437	3.40199e-266	9.03142e-265
NM_001205363	Clec9a	4.21222	3.43311e-07	8.07024e-07		NM_197988	1190005I06Rik	-1.31406	3.56606e-23	1.4817e-22
NM_010065	Dnm1	4.21188	0	0		NM_172678	Acad9	-1.31357	6.0576e-231	1.39079e-229
NM_027884	Tns1	4.20423	0	0		NM_010492	Ica1	-1.31292	1.11449e-38	6.18419e-38
NM_010222	Fkbp7	4.20352	0	0		NM_009197	Slc16a2	-1.31259	1.99331e-297	6.06513e-296
NM_011912	Vax2	4.19875	1.26743e-10	3.54339e-10		NM_008492	Ldhb	-1.31127	1.46328e-107	1.64501e-106
NM_008205	H2-M9	4.19333	4.40504e-12	1.30983e-11		NM_001252382	Irf5	-1.31053	1.33835e-17	4.79587e-17
NM_011846	Mmp17	4.19107	7.84496e-177	1.33427e-175		NM_001253768	Ssx2ip	-1.31037	1.10524e-123	1.38038e-122
NM_183160	Tmem252	4.1884	5.70558e-23	2.35935e-22		NM_001093749	Mpzl3	-1.30835	2.69945e-61	1.99639e-60
NM_007400	Adam12	4.17638	0	0		NM_146251	Pnpla7	-1.3074	5.18496e-144	7.26918e-143
NM_022983	Lpar3	4.17352	1.37449e-15	4.61872e-15		NM_030562	Lrfn1	-1.30565	8.07084e-19	2.99121e-18
NM_028544	Rasip1	4.17233	2.32086e-106	2.58185e-105		NM_025886	Rassf7	-1.30515	1.69429e-58	1.21505e-57
NM_177909	Slc9a9	4.16677	1.65167e-85	1.5487e-84		NM_010907	Nfkbia	-1.30481	9.51518e-148	1.3644e-146
NM_010097	Sparcl1	4.16378	0	0		NM_053015	Mlph	-1.30404	1.80069e-108	2.03425e-107
NM_001163608	Plxdc1	4.16293	0	0		NM_001286753	Cd27	-1.30277	9.22291e-06	1.97964e-05
NM_032007	Mmp1b	4.16145	2.37174e-09	6.2431e-09		NM_133212	Tlr8	-1.30219	9.95373e-10	2.6634e-09
NM_001081333	Plekhg4	4.15463	9.15272e-37	4.93342e-36		NM_028918	Ttc25	-1.30129	0.000939508	0.00170864
NM_008368	Il2rb	4.15434	7.93195e-13	2.42817e-12		NM_009696	Apoe	-1.30084	5.16439e-103	5.61874e-102
NM_013921	Prss30	4.15148	8.64498e-13	2.64352e-12		NM_153060	Spns2	-1.29704	1.73748e-243	4.20903e-242
NM_008329	Ifi204	4.14079	1.16625e-176	1.97991e-175		NM_183019	Arhgef4	-1.2956	1.82135e-15	6.09885e-15
NM_030728	Cemip	4.13646	9.32688e-128	1.19285e-126		NM_031874	Rab3d	-1.29493	2.35875e-120	2.88861e-119
NM_010101	S1pr3	4.11433	5.64665e-199	1.10106e-197		NM_009023	Rapsn	-1.29484	3.70728e-14	1.18933e-13
NM_028375	Cxx1c	4.11066	7.88315e-104	8.61391e-103		NM_027893	Pvrl4	-1.29483	2.11482e-153	3.16184e-152
NM_011109	Pla2g2d	4.10442	4.63087e-18	1.68185e-17		NR_035430	Mir1198	-1.29476	4.23132e-26	1.89275e-25
NM_009780	C4b	4.10062	0	0		NM_001025103	Cracr2b	-1.29433	8.73991e-116	1.03154e-114
NM_008299	Dnajb3	4.10048	5.51963e-16	1.8794e-15		NM_023716	Tubb2b	-1.29282	2.3975e-181	4.16987e-180
NM_001029878	Lonrf2	4.09733	4.54457e-19	1.69588e-18		NM_001198955	Gm7694	-1.29276	1.02187e-68	8.23472e-68
NM_001301332	Gdnf	4.09357	3.54156e-30	1.71407e-29		NR_106143	Mir7678	-1.29192	2.39322e-62	1.79533e-61
NM_019454	Dll4	4.09184	1.67643e-180	2.89755e-179		NM_001278601	Tnf	-1.29125	2.16144e-39	1.21126e-38
NM_019707	Cdh13	4.09045	1.05927e-87	1.01524e-86		NM_001113373	Shank2	-1.29078	1.1692e-55	8.10568e-55
NM_024263	Mxra8	4.08919	0	0		NM_175234	Faxc	-1.28994	1.63652e-144	2.30369e-143
NM_178406	Gpr153	4.08619	0	0		NM_133821	Phlpp1	-1.28952	2.4313e-160	3.76512e-159
NM_027510	3830403N18Rik	4.08524	5.19081e-09	1.342e-08		NR_038175	2610206C17Rik	-1.28811	5.82096e-12	1.72381e-11
NM_001190886	Kcnip1	4.08081	5.03141e-09	1.30201e-08		NM_011212	Ptpre	-1.28773	5.49208e-113	6.38414e-112
NM_053091	Cox4i2	4.07952	3.30457e-17	1.17113e-16		NR_015459	4933431E20Rik	-1.28743	2.44543e-77	2.15094e-76
NM_010742	Ly6d	4.0756	3.29278e-97	3.40964e-96		NM_174868	Fam73a	-1.28492	2.99558e-119	3.63792e-118
NR_028107	Kcnmb4os1	4.07324	6.45459e-08	1.58021e-07		NM_001282148	Gm15816	-1.28487	6.81912e-05	0.00013744
NR_033564	Gm16897	4.07301	6.40782e-43	3.75664e-42		NM_001289506	Dcstamp	-1.28452	2.40588e-06	5.35502e-06
NM_027025	Adora3	4.07157	2.74784e-11	7.90163e-11		NM_001198833	Ddr1	-1.28348	2.54881e-210	5.30233e-209
NM_019568	Cxcl14	4.07148	0	0		NM_027526	Rasgef1a	-1.28269	6.96848e-10	1.87549e-09
NR_030492	Mir711	4.06787	1.05539e-42	6.18211e-42		NM_145857	Nod2	-1.28244	3.43644e-21	1.35872e-20
NM_001146350	Eng	4.06509	0	0		NM_152947	Ovol2	-1.2808	5.45551e-14	1.73909e-13
NM_172497	Efhb	4.06421	8.05491e-08	1.96383e-07		NR_037964	2610507I01Rik	-1.27989	0.000903221	0.00164632
NM_001289460	Hgf	4.06092	9.50784e-65	7.30879e-64		NM_001166705	1700101E01Rik	-1.27972	0.0287376	0.0441697
NM_013568	Kcna6	4.06086	4.30055e-133	5.68934e-132		NM_177687	Crebl2	-1.27918	2.10303e-75	1.81179e-74
NM_172854	Olfml2a	4.06075	1.53728e-33	7.86944e-33		NM_001001297	Thnsl1	-1.27898	3.05944e-16	1.05025e-15
NM_001277954	Sh3gl3	4.06063	8.79737e-08	2.13863e-07		NM_023059	Sigirr	-1.27873	8.09832e-39	4.50632e-38
NR_039591	Mir5129	4.05619	4.88736e-41	2.79484e-40		NM_001024703	Mctp2	-1.27849	1.18287e-32	5.9789e-32
NM_009074	Mst1r	4.05486	1.35713e-86	1.28426e-85		NM_028725	Sdr42e1	-1.27824	1.3298e-50	8.68416e-50
NM_009378	Thbd	4.04926	1.13477e-114	1.33082e-113		NM_001161338	Sh3bp5l	-1.27737	1.29517e-173	2.15777e-172
NM_029394	Snx24	4.0486	7.30876e-193	1.36831e-191		NM_007428	Agt	-1.2773	0.00102203	0.00185131
NM_146064	Soat2	4.04569	9.1089e-38	4.99043e-37		NM_145977	Slc45a3	-1.27613	5.27535e-141	7.31442e-140
NM_199251	Kcnk12	4.04297	5.50386e-11	1.56112e-10		NM_029115	Ccdc181	-1.27573	1.24944e-44	7.47534e-44
NM_027770	Col24a1	4.03715	2.50114e-65	1.93447e-64		NM_019455	Hpgds	-1.27351	1.22125e-07	2.94378e-07
NM_008305	Hspg2	4.03158	0	0		NM_010321	Gnmt	-1.27299	0.00151684	0.0027039
NM_001160368	Rnf152	4.03112	5.17119e-56	3.59852e-55		NM_008532	Epcam	-1.27136	0	0
NM_001204166	Rapgef4	4.03025	2.75097e-30	1.33517e-29		NM_019946	Mgst1	-1.27026	8.63904e-303	2.7029e-301
NM_172778	Maob	4.03002	7.27868e-75	6.24928e-74		NM_145489	AI661453	-1.26725	7.17315e-134	9.54432e-133
NM_001080935	B230217C12Rik	4.02914	3.96955e-07	9.28789e-07		NM_001033262	2020-03-09	-1.26615	3.04869e-39	1.70535e-38
NM_001033205	Zfp575	4.01843	6.43002e-12	1.90194e-11		NM_009427	Tob1	-1.26489	9.14319e-155	1.37366e-153
NM_153098	Cd109	4.01785	2.43352e-203	4.86159e-202		NM_145211	Oas1a	-1.26284	3.58055e-20	1.37107e-19
NM_009131	Clec11a	4.01703	1.81367e-126	2.30255e-125		NM_175454	Hid1	-1.26204	5.1283e-97	5.30633e-96
NM_010739	Muc13	4.01575	9.01379e-10	2.4175e-09		NM_026922	Atp2c2	-1.26174	3.36644e-47	2.09233e-46
NM_001164352	Efemp2	4.01363	0	0		NM_001161770	Lmo4	-1.2608	2.89841e-201	5.71204e-200
NM_001145927	Pianp	4.01258	0	0		NM_183148	Iffo2	-1.2604	1.06137e-182	1.86948e-181
NM_177034	Apba1	4.0115	7.17985e-232	1.65119e-230		NM_010016	Cd55	-1.25904	2.15971e-88	2.0829e-87
NM_016853	Stac	4.00729	1.25923e-11	3.68533e-11		NM_001290565	Syne4	-1.2585	8.06083e-50	5.20616e-49
NM_027921	Slc16a14	4.00548	1.64385e-07	3.93199e-07		NM_013653	Ccl5	-1.25793	8.4383e-05	0.000168675
NM_001160386	Dnah7b	4.00511	1.32417e-07	3.18632e-07		NM_028448	Cenpv	-1.25655	2.6892e-16	9.24409e-16
NM_001044751	Hsd11b1	4.0014	2.94404e-201	5.79783e-200		NM_008982	Ptprj	-1.25597	1.57969e-112	1.83166e-111
NM_010226	Foxs1	3.99991	5.38168e-104	5.88753e-103		NM_010867	Myom1	-1.25547	7.8473e-05	0.000157361
NM_001289728	Tmem255a	3.99984	1.59681e-34	8.27358e-34		NR_028445	F930015N05Rik	-1.25477	0.0241424	0.037517
NM_199252	Unc93a	3.9982	1.98294e-09	5.23909e-09		NM_173181	Zc2hc1a	-1.25411	3.11176e-125	3.91643e-124
NM_001034907	Zc3h12b	3.99735	1.06618e-20	4.1562e-20		NM_015731	Atp9a	-1.25404	4.65892e-184	8.26929e-183
NM_175750	Plxna4	3.9887	6.28239e-195	1.19146e-193		NM_001168620	Enpp5	-1.25346	6.8136e-130	8.85735e-129
NM_138649	Syt17	3.98715	2.72605e-26	1.22495e-25		NM_144520	Sec14l2	-1.25035	7.20382e-148	1.03458e-146
NR_105022	1010001N08Rik	3.98393	2.33445e-08	5.83487e-08		NM_175350	Catsperd	-1.24994	1.79632e-05	3.78066e-05
NM_013531	Gnb4	3.9821	3.70258e-236	8.70295e-235		NM_001033489	Rnf207	-1.2498	1.98688e-11	5.75589e-11
NM_008090	Gata2	3.97842	5.51635e-18	1.99872e-17		NM_008655	Gadd45b	-1.24827	3.24846e-101	3.4863e-100
NM_023396	Rprm	3.9763	1.54514e-09	4.0996e-09		NM_001205355	Fhdc1	-1.24512	1.13783e-102	1.23551e-101
NM_178793	Ccbe1	3.97298	6.51881e-57	4.58352e-56		NM_001285498	Tead2	-1.2445	1.30926e-208	2.69332e-207
NM_001277202	Clec2f	3.96909	1.26389e-10	3.53388e-10		NM_144811	Cbx7	-1.24406	4.46349e-46	2.72945e-45
NM_001160229	Zfp275	3.96092	0	0		NM_001033447	Gm960	-1.24343	0.0338295	0.0515183
NM_001013019	Lrrn4cl	3.95766	1.86662e-148	2.69614e-147		NM_001103171	Myo15	-1.24292	0.0169664	0.0269063
NM_027052	Slc38a4	3.95656	1.70597e-08	4.29619e-08		NM_194269	Morn2	-1.24273	6.31256e-14	2.00699e-13
NM_175199	Hspa12a	3.9537	4.11112e-76	3.56731e-75		NM_023220	Sppl2a	-1.24229	1.02656e-240	2.45249e-239
NM_007738	Col7a1	3.95059	0	0		NM_007421	Adssl1	-1.24191	1.10192e-48	6.98675e-48
NM_011511	Abcc9	3.95021	6.89018e-161	1.07001e-159		NR_045436	2700054A10Rik	-1.24186	9.53279e-09	2.43073e-08
NM_001103157	Steap2	3.94992	1.54637e-282	4.46945e-281		NR_026596	Gm5126	-1.24118	0.00579512	0.00977527
NM_181277	Col14a1	3.94851	9.53319e-172	1.57874e-170		NM_001083906	Nr3c2	-1.24106	1.88009e-26	8.47573e-26
NM_207298	Cercam	3.94824	0	0		NM_145827	Nlrp3	-1.24106	1.2485e-05	2.65552e-05
NM_053116	Wnt16	3.94063	4.67317e-11	1.33054e-10		NM_031881	Nedd4l	-1.24068	3.96295e-177	6.76094e-176
NM_001013386	Rasl10b	3.93952	2.57188e-07	6.09072e-07		NM_001001986	Nol4l	-1.2402	1.58989e-127	2.02961e-126
NM_001014761	Scn2b	3.93731	1.29527e-13	4.08434e-13		NM_001164036	Ly6e	-1.23991	2.52189e-266	6.71429e-265
NR_045850	B130024G19Rik	3.92979	3.86602e-11	1.10391e-10		NM_145373	Sectm1a	-1.23835	1.01642e-29	4.87841e-29
NR_037679	5330439B14Rik	3.92893	2.42517e-09	6.38072e-09		NM_144799	Lmcd1	-1.23821	8.57861e-28	3.97412e-27
NM_031161	Cck	3.92252	1.45855e-49	9.38769e-49		NM_172707	Ppp1cb	-1.2373	4.11986e-292	1.22793e-290
NM_008606	Mmp11	3.91693	0	0		NM_199465	Nexn	-1.23709	5.92747e-28	2.75379e-27
NM_008572	Mcpt8	3.91553	1.00726e-37	5.51406e-37		NM_152220	Stx3	-1.2369	1.901e-114	2.22566e-113
NM_001099636	Pnmal2	3.91535	2.6324e-39	1.47309e-38		NR_030709	Gm16386	-1.23594	2.09988e-06	4.69429e-06
NM_001289521	Zeb2	3.9149	0	0		NM_172580	Acot6	-1.23548	1.58322e-15	5.30918e-15
NM_153776	Tmem121	3.90742	3.19989e-29	1.52394e-28		NM_133994	Gstt3	-1.23428	1.00847e-158	1.54873e-157
NM_009523	Wnt4	3.90477	1.11309e-58	8.00323e-58		NM_016798	Pdlim3	-1.23332	4.96254e-58	3.5387e-57
NM_001243857	Fam124a	3.89808	3.60789e-90	3.52128e-89		NM_029031	Shpk	-1.23241	1.08575e-27	5.01726e-27
NM_007389	Chrna1	3.89698	7.49656e-09	1.92125e-08		NR_028122	2310001K24Rik	-1.23227	0.0337734	0.0514356
NM_009465	Axl	3.89452	0	0		NM_010271	Gpd1	-1.2314	3.30326e-105	3.6498e-104
NM_138315	Mical1	3.89368	0	0		NM_001164316	Ccser1	-1.23013	2.47611e-16	8.519e-16
NM_016696	Gpc1	3.88768	0	0		NM_009368	Tgfb3	-1.22737	1.85271e-194	3.50407e-193
NM_011595	Timp3	3.88733	4.40432e-116	5.21382e-115		NR_110520	2010111I01Rik	-1.22538	2.00631e-174	3.3648e-173
NM_001037865	Col28a1	3.88518	8.64919e-15	2.8382e-14		NM_133732	4931406C07Rik	-1.22454	5.17569e-136	6.96016e-135
NM_008153	Cmklr1	3.88388	0	0		NM_177660	Zbtb10	-1.22353	7.69842e-115	9.03227e-114
NM_175314	Adamts9	3.87827	2.20873e-191	4.0908e-190		NM_009908	Cmas	-1.22269	2.26349e-222	4.98995e-221
NM_016908	Syt5	3.87801	5.27814e-26	2.35454e-25		NM_001162424	Arhgap4	-1.22265	2.2787e-12	6.86114e-12
NM_011228	Rab33a	3.87736	2.93919e-12	8.80391e-12		NM_194060	Foxo6	-1.22255	9.27759e-07	2.12321e-06
NM_007717	Cmah	3.8705	6.55336e-33	3.32825e-32		NM_001135567	1190007I07Rik	-1.22119	9.92046e-10	2.65476e-09
NM_001205101	Gm13212	3.87003	1.0589e-14	3.46489e-14		NM_033478	Ly6g6d	-1.22115	5.73764e-05	0.000116209
NM_010607	Kcnk2	3.86668	4.55509e-18	1.65476e-17		NM_001177980	Pde4b	-1.22089	3.29799e-205	6.65583e-204
NR_040274	9330179D12Rik	3.86533	5.95282e-07	1.37816e-06		NM_028011	Tom1l1	-1.2207	2.19555e-110	2.50897e-109
NM_001177959	Gpm6b	3.86433	0	0		NM_010590	Ajuba	-1.22055	2.35971e-126	2.99167e-125
NM_152818	Osbp2	3.86367	1.39379e-102	1.51107e-101		NM_007883	Dsg2	-1.22039	1.57128e-121	1.93796e-120
NM_008490	Lcat	3.86227	1.80369e-08	4.53899e-08		NM_013521	Fpr1	-1.21968	8.33915e-05	0.000166789
NM_133189	Cacng7	3.86036	2.16278e-19	8.14099e-19		NM_001040654	Cdkn2a	-1.21958	6.60267e-26	2.93689e-25
NM_009544	Zfp105	3.85648	1.06769e-55	7.40748e-55		NM_001042675	Rbpms	-1.21651	7.37883e-123	9.19497e-122
NM_023184	Klf15	3.85282	1.90924e-74	1.63012e-73		NM_011676	Unc119	-1.2148	3.782e-90	3.68861e-89
NM_010351	Gsc	3.85252	1.01193e-08	2.5772e-08		NM_001077705	Ptpn6	-1.21398	5.7559e-63	4.34265e-62
NM_007472	Aqp1	3.85122	8.83912e-44	5.22516e-43		NM_001164074	Tgif1	-1.21369	3.43612e-180	5.92052e-179
NM_009893	Chrd	3.84822	1.13672e-146	1.61991e-145		NR_028416	D630041G03Rik	-1.21222	1.99121e-13	6.21936e-13
NM_029346	Dynap	3.84764	2.80336e-52	1.87086e-51		NM_001281859	Cysltr1	-1.21185	0.0200083	0.0314725
NM_172921	Nxpe4	3.84611	1.19287e-101	1.2832e-100		NM_001301282	Ctf1	-1.21077	8.7652e-21	3.42603e-20
NM_001081655	Dact3	3.84607	5.17548e-235	1.21238e-233		NM_033474	Arvcf	-1.21046	1.21866e-83	1.12968e-82
NM_001029838	Pknox2	3.84585	2.15452e-175	3.62653e-174		NM_145853	Tpcn1	-1.2104	5.81756e-202	1.14977e-200
NM_026644	Agpat4	3.845	2.11326e-126	2.68167e-125		NR_029531	Mir27b	-1.21027	1.01253e-06	2.31205e-06
NM_001253804	Slc12a4	3.84252	0	0		NR_033220	BC039771	-1.20882	7.70915e-21	3.0205e-20
NM_175407	Sobp	3.8406	1.92454e-53	1.30036e-52		NM_028010	Apol6	-1.20859	1.22446e-05	2.6076e-05
NM_013415	Atp1b2	3.84054	1.03661e-69	8.43704e-69		NM_010109	Efna5	-1.2085	4.27372e-156	6.44878e-155
NM_013864	Ndrg2	3.8391	6.0683e-189	1.11201e-187		NR_015566	A330023F24Rik	-1.20821	4.27694e-10	1.16262e-09
NM_001278581	Pomc	3.83831	1.05294e-07	2.54738e-07		NM_001080979	Tead4	-1.20805	1.15079e-29	5.51954e-29
NM_177006	Nwd2	3.83592	8.65546e-08	2.10487e-07		NM_016701	Nes	-1.20774	2.03984e-250	5.06104e-249
NM_001080934	Slc16a5	3.8352	5.86006e-12	1.73521e-11		NR_024085	BC006965	-1.20648	1.11844e-115	1.31949e-114
NM_001290451	Gria3	3.8331	4.33617e-161	6.7414e-160		NM_001291226	Rbm47	-1.20626	6.08594e-104	6.65273e-103
NM_001294150	Kif1a	3.82776	0	0		NM_001081124	Map7d2	-1.20556	0.000901492	0.00164339
NR_104339	Adamtsl5	3.82744	0	0		NM_080288	Elmo1	-1.20259	3.22259e-82	2.95269e-81
NM_173451	Arsj	3.82561	4.81318e-84	4.47072e-83		NM_134147	Macrod1	-1.2016	7.44226e-40	4.19948e-39
NM_026878	Rasl11b	3.82543	4.35566e-206	8.86141e-205		NM_001113474	Lair1	-1.20158	8.44657e-06	1.81836e-05
NM_175475	Cyp26b1	3.82334	9.63125e-153	1.43685e-151		NR_015455	BC064078	-1.20147	8.53007e-12	2.51372e-11
NM_021452	Kcnmb4	3.81717	1.4911e-11	4.34098e-11		NM_010346	Grb7	-1.20062	1.29467e-87	1.23816e-86
NM_008737	Nrp1	3.79845	0	0		NM_183209	Gprin2	-1.19983	4.57319e-05	9.32933e-05
NM_001102410	Kng2	3.79752	1.56068e-16	5.41118e-16		NM_133712	Klk10	-1.19949	6.31049e-13	1.93801e-12
NM_001271915	B3gnt9	3.79665	0	0		NM_177466	Rab11fip5	-1.19836	6.9526e-270	1.89479e-268
NM_001170954	A4galt	3.79439	2.2033e-181	3.83693e-180		NM_031199	Tgfa	-1.19813	1.72425e-91	1.71243e-90
NM_013813	Epb4.1l3	3.79438	0	0		NM_182805	Gpt	-1.19812	7.17863e-22	2.88489e-21
NM_008882	Plxna2	3.78912	6.64769e-188	1.21257e-186		NM_012054	Aoah	-1.19802	4.41515e-07	1.03009e-06
NM_008973	Ptn	3.78224	1.07721e-15	3.63343e-15		NM_001242427	Slc37a1	-1.19696	1.03016e-28	4.8568e-28
NM_010930	Nov	3.78021	1.19016e-51	7.88949e-51		NM_145826	Il17re	-1.19692	2.05996e-87	1.96615e-86
NM_011701	Vim	3.77947	0	0		NM_026146	Eps8l1	-1.19595	1.41013e-48	8.93074e-48
NM_028460	Pear1	3.77759	0	0		NM_010745	Ly86	-1.19436	9.98269e-06	2.13676e-05
NR_035436	Mir1903	3.77356	7.66583e-37	4.13599e-36		NM_001008233	Plekhn1	-1.19426	4.22621e-74	3.60171e-73
NM_001097623	Trerf1	3.77325	8.19186e-172	1.35742e-170		NM_011414	Slpi	-1.19414	2.45522e-112	2.8409e-111
NM_011311	S100a4	3.77259	3.85249e-193	7.23198e-192		NM_013494	Cpe	-1.19333	5.58874e-201	1.09905e-199
NM_001286062	Angpt1	3.76826	1.07716e-306	3.42877e-305		NM_023628	Anxa9	-1.19179	1.4205e-20	5.51024e-20
NM_001081160	Mdga1	3.74871	3.42067e-249	8.46425e-248		NM_001168333	Tinagl1	-1.1912	7.28799e-125	9.1601e-124
NM_199022	Shc4	3.74492	4.32309e-294	1.30111e-292		NM_026588	Stx19	-1.19097	0.000985442	0.00178842
NM_175649	Tnfrsf26	3.74333	0	0		NM_001081141	Gabbr2	-1.19091	0.0189654	0.0299068
NM_025422	Cd302	3.74052	1.33975e-267	3.6086e-266		NM_001015046	Rap1gap2	-1.19077	1.99328e-97	2.06866e-96
NM_001085522	Gm13251	3.73922	1.16329e-45	7.08699e-45		NM_001100458	Fam169a	-1.19027	2.9605e-29	1.41066e-28
NM_009324	Tbx2	3.73893	2.69212e-71	2.2298e-70		NM_026871	Hint2	-1.1888	1.6433e-58	1.17879e-57
NM_145363	Tspan10	3.73432	4.81757e-18	1.74759e-17		NM_019809	Pdlim5	-1.18756	6.57776e-145	9.27822e-144
NM_001289442	Grap2	3.72917	5.41531e-08	1.33071e-07		NR_045776	9530080O11Rik	-1.18735	9.78849e-05	0.000194862
NM_018867	Cpxm2	3.72698	2.85004e-21	1.12961e-20		NM_026192	Calcoco1	-1.18684	7.93871e-212	1.66149e-210
NM_001012765	Adcy5	3.72466	2.43006e-141	3.37611e-140		NM_013754	Insl6	-1.18668	1.42919e-15	4.80136e-15
NM_001081421	Galnt16	3.72347	2.89662e-21	1.14758e-20		NM_172760	Elmo3	-1.18634	4.24061e-86	3.99654e-85
NM_001252058	Ly6c1	3.72238	8.68181e-18	3.12724e-17		NR_015604	E130112N10Rik	-1.18617	1.10884e-05	2.36667e-05
NM_009141	Cxcl5	3.71745	4.18123e-72	3.49982e-71		NM_145438	Llgl2	-1.1857	1.18137e-104	1.29805e-103
NM_001038624	Ric3	3.71496	9.15412e-10	2.45466e-09		NM_001201378	Ccdc136	-1.18561	9.46379e-37	5.1001e-36
NM_172399	Ndnf	3.71415	2.18332e-15	7.2968e-15		NM_027395	Basp1	-1.18511	4.09701e-107	4.58909e-106
NM_009234	Sox11	3.71123	1.29123e-92	1.29539e-91		NM_178726	Ppm1l	-1.1814	3.70674e-35	1.94092e-34
NM_001276489	Ism1	3.7057	4.72128e-66	3.68454e-65		NM_001290796	Ppp1r14d	-1.18082	0.0421272	0.0632605
NM_001013753	Pcdh17	3.70398	1.32807e-11	3.87779e-11		NM_001290521	Wdr31	-1.18036	1.89674e-08	4.76578e-08
NM_018729	Cd244	3.70362	2.94282e-12	8.81381e-12		NM_008598	Mgmt	-1.18009	1.63491e-14	5.31514e-14
NM_001081153	Unc13c	3.70252	1.77996e-22	7.26277e-22		NM_009924	Cnr2	-1.17958	0.00115561	0.00208265
NR_029457	G530011O06Rik	3.70025	2.78535e-15	9.28418e-15		NM_015766	Ebi3	-1.1794	0.0156045	0.024866
NM_007955	Ptprv	3.68434	1.16348e-80	1.05177e-79		NM_008635	Map7	-1.17667	1.32535e-171	2.19221e-170
NM_008230	Hdc	3.68337	2.64779e-11	7.61869e-11		NM_009140	Cxcl2	-1.17623	4.89315e-10	1.32583e-09
NM_001111119	Ccnb1ip1	3.67845	3.75422e-10	1.02414e-09		NM_172835	Peli3	-1.17608	3.15652e-25	1.37965e-24
NM_001081306	Ptprz1	3.67622	1.28639e-161	2.00444e-160		NM_145226	Oas3	-1.17581	0.00194459	0.0034361
NM_009285	Stc1	3.67043	5.77264e-124	7.21945e-123		NM_027998	Cldn23	-1.17525	8.04076e-19	2.98086e-18
NM_001271761	Adra1a	3.66933	2.43933e-14	7.88587e-14		NM_001038999	Atp8a1	-1.17516	5.28799e-67	4.18101e-66
NM_010373	Gzme	3.66848	1.3398e-14	4.36755e-14		NR_036607	Gm3086	-1.17494	0.00109694	0.00198102
NM_001085521	Syndig1	3.66123	1.43219e-20	5.55485e-20		NM_001081006	Etl4	-1.17453	4.69438e-115	5.5171e-114
NM_001024851	Ankrd34a	3.65706	2.08844e-21	8.29891e-21		NM_001243039	Gm4070	-1.17402	0.000113221	0.000224392
NR_030683	Gm14207	3.65142	3.82918e-24	1.63193e-23		NM_001039160	Gvin1	-1.17402	0.000113221	0.000224392
NR_015530	9530026P05Rik	3.64536	4.21733e-11	1.20249e-10		NM_053169	Trim16	-1.17386	6.57795e-88	6.322e-87
NM_001166206	Erv3	3.64321	1.07459e-49	6.92927e-49		NM_027480	Ankrd24	-1.17343	1.52696e-20	5.92157e-20
NM_010608	Kcnk3	3.64177	7.85989e-18	2.83376e-17		NM_011144	Ppara	-1.1732	4.09072e-07	9.55928e-07
NM_010950	Numbl	3.63771	0	0		NM_023146	Ranbp17	-1.17154	2.31305e-19	8.69835e-19
NM_001284198	Dnmt3l	3.63553	1.24168e-25	5.49215e-25		NM_021287	Sptbn2	-1.17064	3.24832e-122	4.02248e-121
NM_175519	Kctd8	3.62487	8.20256e-09	2.09792e-08		NM_001286127	Nfib	-1.17039	4.51766e-106	5.0136e-105
NM_173864	C1s2	3.62443	2.21917e-86	2.09501e-85		NM_023718	Slco1a6	-1.16958	0.00655694	0.0109894
NM_009635	Avil	3.62389	2.9591e-56	2.06229e-55		NM_031251	Ctns	-1.16953	2.45338e-124	3.07523e-123
NM_019950	Chst5	3.62261	8.89839e-15	2.9179e-14		NM_001277149	Chd7	-1.16951	6.48183e-101	6.93222e-100
NM_177709	Tusc5	3.62219	4.93006e-32	2.46762e-31		NM_001290320	Slc26a8	-1.16762	0.00262452	0.00457794
NM_008182	Gsta2	3.62155	2.2995e-11	6.64208e-11		NM_030014	Hook1	-1.16718	2.44359e-88	2.35341e-87
NM_010118	Egr2	3.62108	0	0		NM_001256122	Limch1	-1.16603	1.70091e-17	6.07148e-17
NM_029305	1700003F12Rik	3.62063	5.01097e-11	1.42526e-10		NM_001081354	Mamld1	-1.16462	5.57569e-50	3.61473e-49
NM_020026	B3galnt1	3.61702	1.06035e-147	1.51966e-146		NR_028266	BC037032	-1.16344	3.84446e-25	1.67505e-24
NM_201367	Gpr176	3.61409	1.82365e-275	5.10566e-274		NM_011973	Mok	-1.1632	2.46805e-08	6.15988e-08
NM_001159376	Dusp15	3.61263	1.28299e-06	2.909e-06		NM_053108	Glrx	-1.16226	3.04882e-59	2.20876e-58
NM_033354	Sec16b	3.60559	0	0		NM_001285793	B4galt4	-1.16182	2.55854e-46	1.56872e-45
NM_008427	Kcnj4	3.60524	2.9635e-27	1.35339e-26		NM_025508	Gmpr	-1.16115	1.45559e-36	7.81083e-36
NM_001042411	Lepre1	3.60091	0	0		NR_045794	Gm16907	-1.16058	6.60197e-57	4.63964e-56
NM_145684	Alox12e	3.59713	6.21179e-09	1.59909e-08		NM_011326	Scnn1g	-1.15996	0.00112069	0.00202221
NM_029021	Ocstamp	3.59101	4.04183e-08	9.98432e-08		NM_028862	Rnf145	-1.1597	6.13357e-214	1.3004e-212
NM_001029877	Nova2	3.58818	8.55971e-18	3.08446e-17		NM_007902	Edn2	-1.1581	0.00010433	0.000207289
NM_080457	Muc4	3.58701	1.61676e-28	7.59524e-28		NM_001164401	Ptpro	-1.15787	0.0029327	0.00509009
NM_001271628	Gja5	3.57934	4.34441e-28	2.0258e-27		NM_026556	Dynll2	-1.15717	1.01367e-221	2.22935e-220
NM_026481	Tppp3	3.57323	4.24237e-91	4.18032e-90		NM_001177595	Slc8b1	-1.15651	6.49914e-85	6.07544e-84
NM_011913	Best1	3.5711	1.30328e-09	3.46985e-09		NM_026431	1810043G02Rik	-1.1553	1.87059e-59	1.35908e-58
NM_001142775	Skint7	3.5709	2.12148e-06	4.74067e-06		NM_172442	Dtx4	-1.15419	9.77624e-100	1.03874e-98
NM_001114098	Mtcl1	3.56441	3.55403e-298	1.08978e-296		NM_033314	Slco2a1	-1.15408	3.70036e-169	6.03412e-168
NM_021451	Pmaip1	3.56373	0	0		NR_040609	2010009K17Rik	-1.15398	0.00998615	0.0163846
NR_045451	3010001F23Rik	3.56118	2.708e-06	6.00191e-06		NM_009907	Cln3	-1.15396	1.82376e-74	1.5581e-73
NM_026142	3632451O06Rik	3.55807	2.64218e-70	2.16256e-69		NR_028427	5830416P10Rik	-1.15227	4.96156e-08	1.22138e-07
NM_013509	Eno2	3.55349	0	0		NM_001128084	Arhgap21	-1.15186	6.53464e-148	9.39448e-147
NM_023116	Cacnb2	3.55281	2.36768e-10	6.5239e-10		NR_040529	Gm13807	-1.15131	4.1348e-06	9.07272e-06
NM_013822	Jag1	3.54845	0	0		NM_172383	Tmem125	-1.15057	1.83979e-19	6.93656e-19
NM_001105201	Cyp26c1	3.54759	1.86139e-06	4.17565e-06		NM_001024145	Pla2g4f	-1.14958	0.00344681	0.00593671
NM_027839	Ceacam20	3.5443	2.36843e-51	1.56477e-50		NM_001037741	Gpx4	-1.14846	7.82906e-236	1.83867e-234
NM_001163676	Abcc4	3.54189	7.59504e-125	9.5417e-124		NM_001291070	Aifm3	-1.14796	4.60563e-08	1.13527e-07
NM_021515	Ak1	3.54163	0	0		NM_001033221	G6b	-1.14736	0.0182742	0.0288629
NM_001033220	AU021092	3.54143	3.36003e-12	1.00373e-11		NR_015508	Jpx	-1.14698	0.000149948	0.000294482
NM_001081289	Fam217b	3.53983	3.2298e-37	1.7525e-36		NM_001256065	Gm5141	-1.14697	5.88929e-05	0.000119167
NM_001033668	Dnah1	3.5382	1.05841e-10	2.96923e-10		NM_011158	Prkar2b	-1.14658	2.46296e-27	1.12629e-26
NM_011452	Serpinb9b	3.537	8.0666e-38	4.42289e-37		NM_013831	Pstpip2	-1.14656	7.3562e-21	2.88466e-20
NM_178767	Agmo	3.53477	9.51158e-99	1.00101e-97		NM_010904	Nefh	-1.14614	0.0233601	0.0363667
NR_033553	1700048O20Rik	3.53369	1.64734e-13	5.16571e-13		NM_178628	Atl1	-1.14589	1.57098e-26	7.08799e-26
NM_019820	Cbln3	3.52982	1.57233e-10	4.3742e-10		NR_033554	D330041H03Rik	-1.14577	2.21386e-32	1.11454e-31
NR_038077	1700001G11Rik	3.52893	2.12374e-46	1.30357e-45		NM_028724	Rin2	-1.14508	1.44661e-242	3.48004e-241
NM_001080929	Cdr2l	3.5257	0	0		NM_001045484	Mef2b	-1.14499	0.000602489	0.0011158
NM_008327	Ifi202b	3.52236	1.76862e-214	3.76414e-213		NM_133974	Cdcp1	-1.1448	6.34965e-144	8.88855e-143
NM_008675	Nbl1	3.521	0	0		NM_001168392	Ramp1	-1.14438	2.58455e-39	1.4466e-38
NM_001170978	Abat	3.51282	1.39836e-36	7.50662e-36		NM_020005	Kat2b	-1.14419	1.56934e-135	2.10531e-134
NM_008024	Foxl1	3.50487	2.33038e-09	6.13949e-09		NM_029001	Elovl7	-1.14395	1.59342e-93	1.61022e-92
NM_010043	Des	3.50457	4.94454e-49	3.15314e-48		NM_010125	Elf5	-1.14127	3.97976e-164	6.28612e-163
NM_009375	Tg	3.50134	5.23906e-07	1.21678e-06		NR_045889	Gm10791	-1.14101	0.000233034	0.000448711
NM_007548	Prdm1	3.50038	1.58073e-125	1.99221e-124		NM_001085449	Ctnnd1	-1.14093	0	0
NM_173019	Pfkfb4	3.49994	1.02921e-213	2.17374e-212		NM_001290518	Slc31a2	-1.14071	1.37898e-85	1.29433e-84
NM_001025577	Maf	3.49975	1.33375e-269	3.63128e-268		NM_153118	Fnbp1l	-1.1407	3.18017e-203	6.33493e-202
NM_001290665	Csrnp3	3.49918	4.86241e-07	1.13063e-06		NM_176952	6430573F11Rik	-1.13947	3.45573e-05	7.11365e-05
NM_008509	Lpl	3.49294	4.10264e-155	6.17046e-154		NM_173379	Leprel1	-1.13832	5.56885e-37	3.014e-36
NM_001039669	Iffo1	3.48959	4.78234e-61	3.52364e-60		NM_017465	Sult2b1	-1.13765	2.04393e-19	7.69678e-19
NM_172841	Slco5a1	3.48953	2.02986e-66	1.59446e-65		NM_033321	P2rx5	-1.13716	1.85461e-05	3.8983e-05
NM_009855	Cd80	3.48735	1.08333e-44	6.49409e-44		NM_133888	Smpdl3b	-1.13694	2.10938e-14	6.83118e-14
NM_001005846	Mcoln2	3.48357	4.95977e-218	1.0729e-216		NM_008109	Gdf5	-1.13676	3.30723e-26	1.48202e-25
NM_007557	Bmp7	3.48243	2.60162e-55	1.79687e-54		NM_011176	St14	-1.13631	6.35203e-187	1.1473e-185
NM_145077	Ucn2	3.48	5.59901e-10	1.51338e-09		NM_010241	Aktip	-1.13607	2.66277e-139	3.6554e-138
NM_173767	Insc	3.47677	8.61832e-20	3.2676e-19		NM_001286944	Jund	-1.13537	2.84204e-91	2.81047e-90
NM_007963	Mecom	3.47496	6.31583e-50	4.0917e-49		NM_001163592	Nhsl1	-1.13424	7.19418e-187	1.29856e-185
NM_001190374	Adamtsl3	3.47419	4.1729e-84	3.8773e-83		NM_001290383	Esrp1	-1.13355	2.098e-232	4.85714e-231
NM_172607	Naprt	3.47291	3.36662e-73	2.84462e-72		NR_036469	Trp53cor1	-1.13286	0.000166231	0.000325331
NM_001001979	Megf10	3.46773	2.62551e-290	7.78349e-289		NR_030776	3110021A11Rik	-1.13243	0.0490029	0.0728349
NM_001081044	Mylk2	3.46366	6.82396e-14	2.1661e-13		NM_175510	Unc80	-1.13211	0.00507517	0.00860964
NM_145981	Phyhip	3.46234	3.49796e-11	1.00119e-10		NM_175480	Zfp612	-1.13153	2.00343e-36	1.07257e-35
NM_010272	Gdf11	3.46051	6.66929e-100	7.10253e-99		NM_001285831	Far1	-1.13134	3.61664e-167	5.83233e-166
NM_001080708	Fam65c	3.46049	1.97602e-83	1.82502e-82		NM_028050	Lmntd2	-1.13112	1.67005e-14	5.42746e-14
NM_144786	Ggt7	3.45656	9.21782e-141	1.2768e-139		NM_177083	B430306N03Rik	-1.13064	3.16044e-08	7.85543e-08
NM_178638	Tmem108	3.45405	1.31042e-176	2.2233e-175		NR_028086	6330419J24Rik	-1.12991	6.38538e-05	0.000128923
NR_038186	Snhg18	3.44409	6.21587e-228	1.40844e-226		NM_172689	Ddx58	-1.12936	1.40254e-131	1.83791e-130
NM_027289	Nt5dc2	3.44294	0	0		NM_001033167	Slc22a23	-1.12867	3.79317e-94	3.85145e-93
NM_001014995	Fam189b	3.44286	3.197e-47	1.98791e-46		NM_001017427	Rasef	-1.12737	1.31805e-42	7.7076e-42
NM_001272033	AA414768	3.43816	2.6608e-56	1.85532e-55		NM_009228	Snta1	-1.12695	5.86374e-143	8.18352e-142
NM_007406	Adcy7	3.43503	0	0		NM_001242349	Ano1	-1.12643	1.50875e-284	4.40208e-283
NM_013534	Leprel2	3.43251	0	0		NM_025697	Spryd7	-1.12637	2.25542e-66	1.77013e-65
NM_009404	Tnfsf9	3.43212	1.27668e-105	1.414e-104		NM_001170332	Clec4a2	-1.12633	1.85297e-05	3.89515e-05
NM_001164212	Rerg	3.42625	9.14487e-171	1.50185e-169		NR_045972	Gm16938	-1.12564	0.00148081	0.00264258
NM_019835	B4galt5	3.42592	0	0		NM_001290572	Ralgps1	-1.12484	3.77687e-37	2.04813e-36
NM_010243	Fut9	3.4088	3.32883e-147	4.75358e-146		NM_178848	Sirt5	-1.12425	1.00269e-23	4.22066e-23
NM_025427	Rgcc	3.40725	2.59209e-116	3.07508e-115		NM_027402	Fndc5	-1.12403	3.45199e-73	2.91587e-72
NM_134133	Smim3	3.40629	0	0		NM_019933	Ptpn4	-1.12291	9.87452e-53	6.61542e-52
NM_207231	Arl5c	3.39218	7.35843e-52	4.88604e-51		NM_029494	Rab30	-1.12274	7.14957e-28	3.31543e-27
NM_001111073	Fxyd5	3.39174	0	0		NR_015505	Firre	-1.1225	5.08357e-67	4.02169e-66
NM_001290315	Igdcc4	3.39152	7.21463e-230	1.64146e-228		NM_178795	Ppip5k1	-1.12198	6.18077e-93	6.22099e-92
NM_177385	Cntln	3.38821	1.68139e-19	6.34623e-19		NM_001167991	Hook2	-1.12195	2.33919e-149	3.39642e-148
NM_010225	Foxf2	3.38456	1.87073e-21	7.44984e-21		NM_080428	Fbxw7	-1.12194	1.55826e-80	1.40681e-79
NM_001166063	Ccdc152	3.38105	1.69097e-19	6.38153e-19		NR_029727	Mirlet7b	-1.12146	0.00171899	0.00305227
NM_001112715	Ifitm1	3.37479	3.21192e-14	1.03317e-13		NM_018786	Prpf40b	-1.12119	2.17864e-86	2.05745e-85
NM_008398	Itga7	3.37288	4.93001e-131	6.44509e-130		NM_001112725	Aldh3a1	-1.12081	1.5616e-07	3.74073e-07
NM_001271695	Kcnj15	3.37088	0	0		NM_138951	Ttc36	-1.11947	0.00595805	0.0100385
NM_010553	Il18rap	3.36866	3.82401e-60	2.79522e-59		NM_023500	Xk	-1.11924	3.41495e-13	1.05804e-12
NM_026166	Ikbip	3.36699	0	0		NM_144524	Angel1	-1.11873	1.15482e-46	7.11679e-46
NM_153543	Aldh1l2	3.36658	0	0		NR_040708	E130102H24Rik	-1.11852	4.61795e-07	1.07605e-06
NM_018763	Chst2	3.36609	0	0		NM_175443	Etnk2	-1.11689	1.80223e-10	4.99869e-10
NM_001253890	Prkar1b	3.35795	8.88993e-103	9.66064e-102		NM_012030	Slc9a3r1	-1.11662	2.37958e-142	3.3143e-141
NM_001204129	C1qtnf1	3.3542	0	0		NM_177260	Tmem154	-1.11643	5.78344e-70	4.71548e-69
NM_011122	Plod1	3.35227	0	0		NM_153054	Slc18a1	-1.11641	3.79378e-11	1.08362e-10
NM_027268	Scrn1	3.34729	1.16727e-34	6.06389e-34		NM_028189	B3gnt3	-1.11619	2.6251e-29	1.25278e-28
NM_010680	Lama3	3.34659	7.00813e-204	1.40208e-202		NR_045477	1700003D09Rik	-1.11481	2.59648e-05	5.39745e-05
NM_001168541	Tsku	3.3455	0	0		NM_009261	Strbp	-1.11461	6.56439e-136	8.82337e-135
NM_010408	Hcn1	3.34521	2.31055e-06	5.15235e-06		NM_001038607	Kcnh1	-1.11444	4.62971e-10	1.25617e-09
NM_001033322	Gucy1a2	3.34341	2.46565e-110	2.81531e-109		NM_026672	Gstm7	-1.11396	7.02123e-05	0.000141338
NM_028306	Hspa12b	3.34265	1.14142e-87	1.09321e-86		NR_030443	Mir678	-1.11223	2.06716e-10	5.71177e-10
NM_001109752	Dlg4	3.34255	0	0		NR_030486	Mir705	-1.11206	5.35859e-29	2.54109e-28
NM_008986	Ptrf	3.34168	0	0		NM_001164327	Phf11b	-1.11168	0.00559834	0.00945602
NM_001289487	Exoc3l4	3.3408	2.18129e-74	1.86183e-73		NM_009753	Bicd1	-1.11015	1.82089e-18	6.67708e-18
NM_008172	Grin2d	3.33713	1.02255e-57	7.26358e-57		NM_013605	Muc1	-1.10965	9.12007e-27	4.12421e-26
NM_031169	Kcnmb1	3.33625	1.7548e-81	1.59831e-80		NM_001102613	Phldb3	-1.10941	5.88317e-53	3.94907e-52
NM_001101433	Zcchc24	3.3322	0	0		NM_001177796	Afap1l2	-1.1093	7.27415e-37	3.92697e-36
NM_175451	Ckap4	3.3291	0	0		NM_001004365	Actr3b	-1.1091	2.09345e-12	6.31021e-12
NM_001290335	Cacna1c	3.32711	0	0		NM_001025263	Tpd52	-1.1089	3.41104e-91	3.36834e-90
NM_020030	Raet1d	3.32523	6.76232e-53	4.537e-52		NM_001271402	Ephx2	-1.10843	4.79312e-18	1.73895e-17
NM_007556	Bmp6	3.32472	2.07846e-12	6.26639e-12		NR_027972	Atad3aos	-1.10834	0.0163084	0.0259206
NM_010816	Morc1	3.32068	1.3388e-06	3.03208e-06		NM_022311	Tcte2	-1.1083	0.000200293	0.000388287
NM_182928	Adm2	3.32021	4.62586e-83	4.25674e-82		NR_106186	Mir8107	-1.10811	0.0160538	0.0255364
NM_011028	P2rx6	3.31704	0.000213638	0.000413002		NM_177243	Slc26a9	-1.10809	0.0165643	0.0263017
NM_001291000	Sema6d	3.31681	3.15307e-305	9.95499e-304		NR_037617	St5	-1.10572	3.77678e-98	3.9537e-97
NM_021719	Cldn15	3.31668	6.22827e-14	1.98155e-13		NM_001163472	Cyp2d22	-1.10542	6.97928e-93	7.01704e-92
NM_001267846	Fign	3.31462	4.99228e-13	1.53744e-12		NM_019737	B4galt6	-1.10533	2.1043e-62	1.58073e-61
NM_008006	Fgf2	3.309	3.1765e-79	2.84273e-78		NM_025681	Lix1	-1.10522	0.000700131	0.00128939
NM_013886	Hdgfrp3	3.30246	1.73688e-100	1.85398e-99		NM_001042659	Fzd5	-1.10512	3.22478e-104	3.53628e-103
NM_178702	Radil	3.29868	4.78011e-81	4.33956e-80		NR_037581	Magix	-1.10387	0.000148111	0.000290999
NM_175140	Chst8	3.29532	7.95795e-14	2.52287e-13		NM_001076681	Lyrm9	-1.10342	1.08745e-30	5.3208e-30
NM_144854	Map3k7cl	3.29488	4.57204e-08	1.12749e-07		NM_178870	Hs3st3a1	-1.10293	0.000885098	0.00161488
NM_194058	Nlrp9b	3.28863	1.15556e-12	3.51956e-12		NM_029589	Tmem53	-1.10272	6.16799e-26	2.74619e-25
NM_177387	Ust	3.28698	4.18706e-241	1.0029e-239		NM_028735	Ttc21a	-1.10217	0.0431515	0.0647074
NM_001177810	Rapgef3	3.28668	2.14655e-45	1.30427e-44		NM_001159505	Tnfsf13	-1.10212	4.07288e-61	3.0041e-60
NM_177322	Agtr1a	3.28517	4.1893e-08	1.03449e-07		NM_001122948	Tfap2a	-1.10084	9.22785e-96	9.46333e-95
NM_027450	Glipr2	3.28315	2.82477e-286	8.30309e-285		NM_175026	Pyhin1	-1.09965	0.00470606	0.00801094
NM_027890	Susd2	3.28046	1.39411e-28	6.55263e-28		NM_174857	Mamdc2	-1.09934	3.44347e-61	2.54324e-60
NM_080453	Mmp28	3.27826	3.98808e-41	2.28342e-40		NM_025416	Them5	-1.09715	6.57326e-07	1.51736e-06
NR_045902	Gm11747	3.27747	1.03902e-251	2.59183e-250		NM_026482	Atp2b1	-1.09712	1.51773e-175	2.55624e-174
NM_001271416	Ly6a	3.27489	4.78982e-169	7.77406e-168		NM_019762	Pkp3	-1.09646	1.22065e-141	1.69672e-140
NM_177674	2010015L04Rik	3.27456	4.04744e-07	9.46214e-07		NM_007949	Ercc2	-1.09595	3.40224e-128	4.35729e-127
NM_029770	Unc5b	3.27264	0	0		NM_009528	Wnt7b	-1.09561	4.92652e-151	7.25202e-150
NM_007901	S1pr1	3.26944	6.10042e-207	1.2466e-205		NM_001291816	Cdk19	-1.09515	3.85561e-137	5.24352e-136
NM_009985	Ctsw	3.26822	5.5756e-112	6.4353e-111		NM_177230	Ccdc158	-1.09472	0.00825302	0.0136862
NM_008452	Klf2	3.26699	7.85752e-131	1.02577e-129		NM_009553	Zscan2	-1.09441	1.25046e-26	5.65015e-26
NM_009994	Cyp1b1	3.26683	0	0		NM_001001309	Itga8	-1.09379	2.03364e-95	2.08245e-94
NM_024406	Fabp4	3.2618	2.87859e-174	4.82478e-173		NM_029809	2310014L17Rik	-1.09356	2.52166e-12	7.57373e-12
NM_198711	Col25a1	3.2596	1.65672e-117	1.99102e-116		NM_001162532	Fam174b	-1.09323	1.40747e-91	1.39983e-90
NM_009179	St3gal2	3.25936	0	0		NM_008858	Prkd1	-1.09319	1.63661e-75	1.41039e-74
NM_027127	Gpx8	3.25682	0	0		NM_001113354	Phf8	-1.09317	1.3261e-109	1.50918e-108
NM_001252292	Mest	3.25483	2.71787e-192	5.06086e-191		NM_001081171	Lama5	-1.09254	6.24741e-109	7.07503e-108
NM_057173	Lmo1	3.25146	1.45905e-25	6.44437e-25		NM_144819	Ccdc92	-1.09198	6.71499e-20	2.55225e-19
NM_013586	Loxl3	3.2505	0	0		NM_153122	Oplah	-1.09142	1.57553e-97	1.63757e-96
NM_008871	Serpine1	3.24555	7.43299e-33	3.77014e-32		NM_001146048	Lrrc1	-1.09018	1.38152e-61	1.02582e-60
NM_007792	Csrp2	3.24071	0	0		NM_173733	Suox	-1.09017	9.71659e-31	4.75845e-30
NM_023850	Chst1	3.23908	5.55205e-134	7.39091e-133		NM_009257	Serpinb5	-1.08942	2.43593e-97	2.52521e-96
NM_152803	Hpse	3.23268	9.53388e-147	1.35934e-145		NM_053136	Pcdhb11	-1.088	6.54174e-14	2.07842e-13
NM_177794	Tmem26	3.21791	3.28243e-22	1.33149e-21		NM_001190437	Abhd11	-1.08797	2.71853e-67	2.15683e-66
NM_001101464	Foxi3	3.2169	4.13464e-14	1.32413e-13		NM_010876	Ncf1	-1.08678	1.46367e-14	4.76401e-14
NM_207109	Astn2	3.21521	1.05123e-32	5.31837e-32		NM_001128601	Gm2382	-1.08558	3.24434e-14	1.04335e-13
NM_011795	C1ql1	3.20935	2.48856e-06	5.52927e-06		NM_053214	Myo1f	-1.08558	5.26209e-19	1.96047e-18
NM_008958	Ptch2	3.20801	1.64668e-16	5.70649e-16		NM_009075	Rpia	-1.08527	1.82577e-67	1.45144e-66
NM_145219	Lgi3	3.206	3.37466e-36	1.79936e-35		NR_015470	2610203C22Rik	-1.08248	1.30225e-08	3.29718e-08
NM_001013390	Scn4b	3.20557	1.62319e-07	3.88457e-07		NM_025638	Gdpd1	-1.08212	8.85553e-65	6.80924e-64
NR_045741	Gm10432	3.20542	2.73566e-06	6.06127e-06		NM_011480	Srebf1	-1.08133	1.91045e-137	2.60071e-136
NM_021475	Adamdec1	3.20057	2.71852e-09	7.13354e-09		NM_009476	Upk2	-1.08092	0.0293666	0.0450663
NM_021412	Mmp19	3.19996	0	0		NM_001001182	Baz2b	-1.08071	1.4293e-78	1.27213e-77
NM_001081161	Fam171a1	3.1989	0	0		NM_021296	Grpel2	-1.08045	2.67132e-80	2.40618e-79
NM_024290	Tnfrsf23	3.19708	2.22873e-96	2.2941e-95		NM_011448	Sox9	-1.0801	5.65152e-151	8.3104e-150
NM_019417	Pdlim4	3.19487	3.61718e-192	6.7264e-191		NM_007649	Cd48	-1.07995	2.14853e-05	4.4963e-05
NM_010078	Drp2	3.19185	1.50576e-31	7.48259e-31		NM_029250	Etnk1	-1.07867	5.82164e-177	9.90752e-176
NM_010720	Lipg	3.18973	3.94849e-38	2.17269e-37		NM_001163009	Tnik	-1.07835	6.9801e-44	4.13239e-43
NM_008435	Kcns1	3.17815	3.02138e-19	1.13267e-18		NM_015759	Fgd3	-1.07704	1.36229e-92	1.36619e-91
NR_110572	Zeb2os	3.17565	5.06888e-54	3.44338e-53		NM_001205236	Arhgap27	-1.07458	1.50213e-73	1.27272e-72
NM_153513	BC028528	3.17062	5.91393e-48	3.71654e-47		NM_001013616	Trim6	-1.07391	2.36556e-10	6.51871e-10
NM_010441	Hmga2	3.16628	6.58201e-290	1.94919e-288		NM_133218	Zfp704	-1.07354	8.54032e-55	5.86636e-54
NM_030712	Cxcr6	3.16418	2.92522e-14	9.42256e-14		NM_016749	Mybph	-1.07291	1.81201e-17	6.45892e-17
NM_175645	Xylt1	3.16075	5.45212e-115	6.40491e-114		NM_001163290	Adck3	-1.07182	2.63371e-44	1.56929e-43
NM_198599	Map6d1	3.16016	6.15017e-07	1.42301e-06		NM_153528	Gramd1c	-1.07068	3.71324e-21	1.46649e-20
NM_145158	Emilin2	3.15967	0	0		NM_025478	Isoc1	-1.06971	1.18083e-175	1.99124e-174
NM_019680	Elf4	3.15952	0	0		NM_134156	Actn1	-1.06791	3.29237e-270	8.99926e-269
NM_026376	Plxnd1	3.15818	0	0		NM_029408	Iqcd	-1.06775	0.000247803	0.000476157
NM_001277903	Tnnt1	3.15623	1.11901e-06	2.54659e-06		NM_001033435	Milr1	-1.06647	0.000448438	0.000840335
NR_038185	C430049B03Rik	3.15366	6.50006e-39	3.62279e-38		NR_106173	Mir8097	-1.06642	5.66554e-13	1.74265e-12
NM_133198	Pygl	3.15208	2.66854e-182	4.67654e-181		NM_172628	Sh3tc2	-1.06619	8.28918e-65	6.37553e-64
NM_144557	Myrip	3.14931	8.94565e-154	1.34035e-152		NM_001037955	Dusp22	-1.06542	2.79824e-64	2.14212e-63
NM_172447	A330021E22Rik	3.14298	8.79978e-13	2.69026e-12		NM_175332	E130012A19Rik	-1.06489	6.18378e-35	3.22696e-34
NM_008369	Il3ra	3.13939	5.77204e-295	1.74288e-293		NM_177117	Dlec1	-1.06432	0.00325102	0.00561661
NM_001291061	Bfsp1	3.1328	3.19792e-18	1.16556e-17		NM_011226	Rab19	-1.06381	3.57803e-12	1.06759e-11
NM_029979	Trim35	3.12877	0	0		NR_046017	9530052E02Rik	-1.06282	0.000117278	0.00023225
NM_008873	Plau	3.12542	0	0		NM_001166375	2020-03-01	-1.06265	2.83978e-05	5.8873e-05
NM_001081252	Uggt2	3.12537	0	0		NM_026880	Pink1	-1.06217	8.11133e-161	1.25823e-159
NR_105782	Mir6363	3.12447	1.01646e-24	4.39144e-24		NM_145136	Myocd	-1.06144	0.00809991	0.0134419
NM_173862	Fam83a	3.12439	2.06148e-133	2.73504e-132		NM_028078	Igsf5	-1.06137	1.9383e-42	1.13084e-41
NM_028064	Slc39a4	3.12437	0	0		NM_023873	Cep70	-1.06084	1.2725e-37	6.9468e-37
NM_008548	Man1a	3.12405	0	0		NM_001271981	Fut1	-1.06081	0.00296703	0.00514751
NM_010683	Lamc1	3.11894	0	0		NM_145443	L2hgdh	-1.05964	9.45639e-42	5.45155e-41
NM_026597	Fam212a	3.11823	2.45028e-41	1.40613e-40		NM_030192	4930562C15Rik	-1.05882	0.0107076	0.0174854
NM_177129	Cntn2	3.11614	2.42665e-23	1.01238e-22		NM_023805	Slc38a3	-1.05721	1.60062e-21	6.38425e-21
NM_021439	Chst11	3.11462	0	0		NM_175543	Rab11fip4	-1.05579	5.01393e-51	3.29217e-50
NM_001284398	Sept4	3.11132	1.0099e-53	6.83362e-53		NM_172671	Lgr4	-1.05516	2.42621e-134	3.23288e-133
NM_001081330	Dnah2	3.11089	2.94815e-07	6.9543e-07		NM_008137	Gna14	-1.05406	3.36857e-32	1.69186e-31
NM_028420	Camk2n2	3.11063	1.6984e-56	1.18995e-55		NM_011915	Wif1	-1.05384	9.14562e-17	3.19456e-16
NM_026960	Gsdmd	3.11038	3.98421e-126	5.04199e-125		NM_013923	Rnf19a	-1.05322	1.88182e-158	2.88674e-157
NM_009016	Raet1a	3.10794	6.72884e-63	5.06979e-62		NM_001252638	Rhobtb1	-1.05229	1.65234e-25	7.28763e-25
NM_009017	Raet1b	3.10794	6.72884e-63	5.06979e-62		NM_001276315	Cdkl2	-1.05014	4.34855e-65	3.35676e-64
NM_031843	Dpp7	3.10691	0	0		NM_001081131	Dhtkd1	-1.04995	1.14365e-21	4.57411e-21
NM_008629	Msi1	3.1049	1.46898e-42	8.58114e-42		NM_027294	Cmtm8	-1.0486	2.92936e-37	1.59103e-36
NR_028300	5330426P16Rik	3.09914	6.4592e-224	1.43308e-222		NM_008625	Mrc1	-1.04852	1.92329e-10	5.32433e-10
NM_028443	Fam101a	3.09538	1.90392e-49	1.22201e-48		NM_001290779	Zfp879	-1.04765	0.00011769	0.000233015
NM_013654	Ccl7	3.09311	2.70619e-42	1.57685e-41		NM_025725	Ccdc96	-1.04672	0.00297946	0.00516777
NM_029415	Slc10a6	3.09307	3.48194e-20	1.33423e-19		NM_198190	Ntf5	-1.04608	6.25999e-31	3.07819e-30
NM_172564	Tns4	3.09067	6.2148e-276	1.74525e-274		NM_001039192	Gmfg	-1.04565	6.76171e-16	2.29274e-15
NM_001080815	Gipr	3.08998	3.10616e-11	8.91167e-11		NM_023270	Rnf128	-1.04557	4.78175e-68	3.82002e-67
NM_001079844	Gpc6	3.08805	0	0		NM_008615	Me1	-1.04546	1.37151e-66	1.07855e-65
NM_145953	Cth	3.08166	6.78218e-40	3.82936e-39		NR_040640	0610043K17Rik	-1.04536	0.0153681	0.0245162
NM_019922	Crtap	3.07894	0	0		NM_001289443	Tnk2	-1.04521	6.1174e-108	6.89116e-107
NM_138602	Praf2	3.07064	2.26548e-266	6.04906e-265		NM_175465	Sestd1	-1.04499	3.70406e-99	3.92055e-98
NR_046131	A530046M15Rik	3.07017	2.64997e-11	7.62416e-11		NM_146236	Tceal1	-1.04422	6.60135e-19	2.45414e-18
NM_019456	Apbb1ip	3.07006	3.1249e-269	8.49121e-268		NM_198091	Usp2	-1.044	4.85888e-16	1.65687e-15
NM_007549	Blk	3.06951	7.98433e-06	1.72246e-05		NM_183027	Ap1s3	-1.04292	2.18023e-27	9.98817e-27
NM_175122	Rab39b	3.06717	1.01606e-07	2.46031e-07		NM_008823	Cfp	-1.0429	4.63826e-17	1.63499e-16
NM_001160378	Fam46a	3.06686	0	0		NR_040433	AU022754	-1.04083	2.23469e-19	8.40597e-19
NR_037996	Hmga2-ps1	3.06607	4.08112e-99	4.31306e-98		NR_038032	Gm15663	-1.04056	9.761e-08	2.36542e-07
NM_033217	Ngfr	3.06584	1.19404e-55	8.2758e-55		NM_001290634	Ugp2	-1.04054	1.03858e-128	1.33692e-127
NM_153564	Gbp5	3.05571	1.14752e-11	3.36549e-11		NR_038060	5830428M24Rik	-1.04039	0.000520925	0.000970066
NM_011446	Sox7	3.05555	3.41633e-38	1.88173e-37		NM_001085390	Dusp5	-1.04028	3.0232e-32	1.51978e-31
NM_133721	Itga9	3.04877	0	0		NR_037235	Mir3074-1	-1.03918	1.04608e-09	2.79666e-09
NM_001145164	Tgtp2	3.04816	2.44762e-06	5.44266e-06		NR_040293	2310040G24Rik	-1.03857	0.000783201	0.00143607
NM_001033345	Catip	3.03484	3.71746e-06	8.17511e-06		NM_008520	Ltbp3	-1.03835	2.27343e-181	3.95657e-180
NM_001081397	Myo16	3.03453	2.15438e-30	1.04764e-29		NM_180958	Ccdc79	-1.03814	0.00576628	0.00972781
NM_013662	Sema6b	3.03144	1.1263e-103	1.22876e-102		NM_028982	8430419L09Rik	-1.03786	3.3673e-93	3.39291e-92
NM_008750	Nxn	3.03032	0	0		NM_001033433	Tmem102	-1.03727	3.33725e-52	2.22449e-51
NR_040446	C920021L13Rik	3.02831	3.31781e-38	1.8282e-37		NM_013861	Tpk1	-1.03623	2.51659e-24	1.0775e-23
NM_007554	Bmp4	3.02683	2.2335e-16	7.70154e-16		NM_001289615	Btn2a2	-1.03621	0.000251964	0.000483817
NM_021530	Slc4a8	3.02565	3.23534e-16	1.10926e-15		NM_001081097	Grik3	-1.03551	2.00994e-18	7.36447e-18
NM_026940	Ydjc	3.0244	5.97467e-46	3.64952e-45		NM_001033548	Dnaaf3	-1.03538	6.32669e-16	2.14945e-15
NM_008328	Ifi203	3.02287	2.40579e-26	1.08263e-25		NM_011101	Prkca	-1.03417	2.61735e-94	2.6605e-93
NM_011784	Aplnr	3.02253	4.78544e-43	2.80907e-42		NM_023622	Rgl3	-1.03404	1.88432e-67	1.49756e-66
NM_175263	Notum	3.02147	8.51573e-08	2.07272e-07		NM_028476	Atat1	-1.03347	3.20094e-34	1.65171e-33
NM_007555	Bmp5	3.01983	1.29318e-11	3.78069e-11		NM_010757	Mafk	-1.03296	2.60785e-92	2.61058e-91
NM_009379	Thpo	3.01876	8.31717e-19	3.08049e-18		NM_019689	Arid3b	-1.03269	1.25803e-10	3.51783e-10
NM_001033213	Ttc7b	3.0119	5.08412e-216	1.08874e-214		NR_045717	C330022C24Rik	-1.03239	1.18417e-17	4.25272e-17
NM_054055	Slc13a3	3.00243	5.15434e-21	2.02812e-20		NM_008079	Galc	-1.03238	3.40068e-76	2.95362e-75
NM_008086	Gas1	2.99759	0	0		NR_109847	Arhgap6	-1.0316	7.30601e-37	3.94339e-36
NM_020025	B3galt2	2.98992	7.58146e-06	1.63862e-05		NM_001291211	Pcmtd2	-1.03077	1.76077e-106	1.96035e-105
NM_008597	Mgp	2.98837	0	0		NM_027206	Tnfaip8l2	-1.03028	0.000189669	0.00036857
NM_009396	Tnfaip2	2.98232	0	0		NM_010139	Epha2	-1.03017	1.04258e-119	1.26892e-118
NM_021360	Neurl1a	2.9814	6.14968e-66	4.79253e-65		NM_146169	Paip2b	-1.02986	2.71833e-113	3.16119e-112
NM_013680	Syn1	2.98136	9.06411e-53	6.07396e-52		NM_001177572	Slc25a13	-1.02963	7.8667e-63	5.92388e-62
NM_173428	Sspo	2.97748	5.93468e-10	1.60224e-09		NM_001033189	C77080	-1.02914	2.89147e-194	5.46498e-193
NM_001077508	Tnfrsf9	2.97101	1.305e-10	3.64623e-10		NM_020028	Lpar2	-1.02832	4.67087e-52	3.10894e-51
NM_001282086	Trpc6	2.96508	1.40636e-11	4.10119e-11		NR_102313	Stap2	-1.02614	5.13669e-49	3.27341e-48
NM_020581	Angptl4	2.9625	6.33735e-269	1.71866e-267		NM_199143	Znrf2	-1.02592	1.95249e-78	1.73611e-77
NR_045752	Gm16596	2.9608	1.02101e-44	6.12184e-44		NM_001109042	Kif21a	-1.02388	2.00233e-66	1.57328e-65
NM_183029	Igf2bp2	2.96029	0	0		NM_001276288	Aes	-1.02387	5.95445e-145	8.40758e-144
NM_009921	Camp	2.9584	9.60253e-07	2.19594e-06		NM_001290989	Clstn1	-1.02357	2.44825e-217	5.27545e-216
NM_001029988	Fat2	2.95814	5.51781e-30	2.66126e-29		NM_177368	Tmtc2	-1.02317	3.9858e-45	2.40914e-44
NR_033241	Bmp1	2.95642	0	0		NM_001285506	Rps6ka1	-1.02269	2.04412e-131	2.67737e-130
NM_001085376	Pappa2	2.9478	2.52311e-09	6.63083e-09		NM_019429	Prss16	-1.02247	6.69124e-18	2.41935e-17
NM_008969	Ptgs1	2.94612	0	0		NR_045421	Gm6277	-1.02246	0.00074423	0.00136733
NM_001290378	Ap1s2	2.93933	5.65109e-167	9.07617e-166		NM_008793	Pcsk4	-1.02085	3.52094e-08	8.73108e-08
NM_001122595	A630033H20Rik	2.93646	3.51971e-44	2.09316e-43		NM_009742	Bcl2a1a	-1.0208	8.28087e-06	1.78393e-05
NM_009018	Raet1c	2.93637	4.37968e-55	3.01589e-54		NR_027913	G630025P09Rik	-1.0203	4.94962e-51	3.25071e-50
NM_007463	Speg	2.93601	4.17099e-82	3.81787e-81		NM_029696	Mdh1b	-1.01944	0.02058	0.0323203
NM_009876	Cdkn1c	2.93555	3.43306e-64	2.62446e-63		NR_029530	Mir23b	-1.01942	1.29378e-05	2.74911e-05
NR_045996	AU021063	2.93527	9.0201e-10	2.41896e-09		NR_110483	Mirlet7bhg	-1.01846	9.41903e-19	3.48156e-18
NM_001004157	Scarf1	2.92765	3.29496e-39	1.842e-38		NM_001085549	Trabd2b	-1.01745	1.59685e-61	1.18476e-60
NM_001038637	Gng2	2.92582	6.21641e-137	8.42929e-136		NM_028705	Herc3	-1.01649	9.62559e-59	6.93167e-58
NM_001130476	Tpst1	2.92257	1.06174e-208	2.18577e-207		NM_008957	Ptch1	-1.01648	8.51824e-50	5.49922e-49
NM_010551	Il16	2.91815	1.56984e-42	9.16644e-42		NM_001098222	Bhlhb9	-1.01641	1.20785e-46	7.43862e-46
NM_001013749	Tmem151b	2.91776	1.24721e-16	4.33573e-16		NM_133707	Kdf1	-1.01559	5.33089e-55	3.66726e-54
NM_027551	Klhl30	2.91662	1.01267e-21	4.05434e-21		NM_008837	Pick1	-1.01473	3.81483e-57	2.6905e-56
NM_008311	Htr2b	2.91609	2.01041e-103	2.19158e-102		NM_172256	Dync2li1	-1.01403	5.90534e-34	3.03702e-33
NM_198617	Tspyl3	2.91517	4.03826e-45	2.44032e-44		NM_023799	Mgea5	-1.01402	7.61668e-96	7.81683e-95
NM_011178	Prtn3	2.91435	1.37232e-108	1.55158e-107		NM_012032	Serinc3	-1.01398	5.74469e-132	7.54935e-131
NM_001163493	Stard13	2.91045	2.17024e-165	3.45156e-164		NM_025744	Erich2	-1.01377	0.00389066	0.00667421
NM_001164493	Klhl29	2.90784	6.93827e-41	3.9554e-40		NM_001163585	Prom1	-1.01297	4.44829e-132	5.84847e-131
NM_001166391	F13a1	2.90336	1.95139e-36	1.04511e-35		NR_029463	9430083A17Rik	-1.01265	2.13171e-06	4.76277e-06
NM_011076	Abcb1a	2.90327	1.1299e-41	6.50569e-41		NM_013512	Epb4.1l4a	-1.01234	1.77802e-147	2.54427e-146
NM_133810	Stk17b	2.90212	0	0		NR_015573	1700012D14Rik	-1.01133	0.0126786	0.0204913
NM_024124	Hdac9	2.90143	1.58852e-50	1.03615e-49		NM_013642	Dusp1	-1.01121	5.62015e-55	3.86336e-54
NM_001159697	Efcc1	2.90096	6.52746e-07	1.50741e-06		NM_001291053	Ypel1	-1.01062	8.35018e-18	3.00974e-17
NM_198193	Raet1e	2.89546	1.26306e-48	8.00294e-48		NM_010404	Hap1	-1.01038	1.48696e-26	6.70997e-26
NM_001113549	Ltbp4	2.88808	7.07041e-231	1.62198e-229		NM_008796	Pctp	-1.0101	1.12614e-24	4.86076e-24
NM_001193266	Mdga2	2.87967	8.74057e-24	3.68592e-23		NM_008131	Glul	-1.0101	1.41628e-98	1.48599e-97
NR_045326	A330009N23Rik	2.87819	5.40656e-13	1.66336e-12		NR_045820	A930024E05Rik	-1.01005	0.000337411	0.000640605
NM_008595	Mfng	2.8781	2.63916e-29	1.25927e-28		NM_177292	Wscd2	-1.00949	0.0289938	0.04455
NM_001081178	Gpr116	2.87738	2.76623e-193	5.19987e-192		NM_001205071	Josd2	-1.00885	1.37652e-71	1.1463e-70
NM_016711	Tmod2	2.87716	1.48948e-74	1.27448e-73		NM_001037098	Nacc2	-1.00866	9.85479e-117	1.17262e-115
NM_028444	Prkcdbp	2.8748	2.8774e-278	8.15478e-277		NM_008506	Mycl	-1.00863	4.54813e-05	9.27959e-05
NM_009037	Rcn1	2.87337	0	0		NM_133838	Ehd4	-1.00758	1.50398e-125	1.89635e-124
NM_001112798	Slc8a1	2.86397	4.00761e-111	4.5968e-110		NR_104378	Fbxl4	-1.00682	7.95675e-48	4.99014e-47
NM_027258	Rnf157	2.86173	1.33843e-271	3.66928e-270		NM_007754	Cpd	-1.00643	3.35112e-125	4.21577e-124
NR_106017	Mir7050	2.85855	2.37492e-05	4.95137e-05		NM_017392	Celsr2	-1.00639	5.42316e-50	3.5175e-49
NM_001034115	Shank1	2.85207	1.00406e-09	2.68612e-09		NR_004444	Zfhx2os	-1.00627	1.53219e-07	3.67315e-07
NM_010233	Fn1	2.85204	0	0		NM_008113	Arhgdig	-1.00616	3.70204e-13	1.14596e-12
NM_009892	Chil3	2.84962	4.27865e-13	1.32075e-12		NM_175189	Hepacam	-1.00585	0.00469642	0.0079968
NM_010597	Kcnab1	2.84568	8.63656e-18	3.11134e-17		NR_038860	Fam187b	-1.00546	9.44165e-13	2.88299e-12
NM_009792	Camk2a	2.84472	1.22795e-05	2.61464e-05		NM_012006	Acot1	-1.00532	1.13162e-34	5.882e-34
NM_011286	Rph3a	2.84206	2.13923e-18	7.8268e-18		NM_172659	Slc2a6	-1.00436	1.75435e-13	5.49566e-13
NM_021302	Stk32c	2.84121	4.91248e-12	1.4579e-11		NM_026879	Chmp2b	-1.00426	1.53234e-121	1.89077e-120
NM_027416	Calml3	2.83967	1.28121e-20	4.9818e-20		NM_153134	Irgq	-1.00281	1.90478e-118	2.2971e-117
NM_001039472	Kif21b	2.83795	0	0		NM_172581	Fam161b	-1.0024	3.81003e-06	8.37336e-06
NM_001136063	Gfra4	2.83695	5.30236e-20	2.0206e-19		NM_145220	Appl2	-1.00157	1.6651e-129	2.15544e-128
NM_153573	Fkbp14	2.83616	0	0		NM_172503	Zswim4	-1.00081	1.37391e-109	1.56295e-108
NM_148942	Serpinb6c	2.83157	2.7249e-06	6.0379e-06		NM_007652	Cd59a	-1.00036	1.80057e-105	1.99026e-104
NR_110430	Lincenc1	2.82906	7.13434e-11	2.01369e-10		NM_019990	Stard10	-1.00034	3.61838e-83	3.33298e-82
NM_153394	Gpr156	2.82736	2.73226e-22	1.1101e-21
NM_001286347	Eml1	2.82199	0	0
NM_001109991	Col18a1	2.82001	0	0
NM_001288627	Emp1	2.81839	0	0
NM_009250	Serpini1	2.81798	3.21948e-45	1.94893e-44
NM_001164785	Adamts20	2.81261	1.37474e-05	2.91598e-05
NM_001177602	Ak4	2.81239	1.37103e-51	9.08192e-51
NM_001170785	Mthfd1l	2.80344	1.06005e-208	2.1839e-207
NM_007763	Crip1	2.80333	0	0
NM_028901	Myo18b	2.80301	3.66989e-62	2.74637e-61
NM_177378	Rnf150	2.80001	3.25157e-275	9.07589e-274
NM_146063	Krt79	2.79857	1.11169e-40	6.32848e-40
NM_010129	Emp3	2.79768	4.18503e-204	8.39097e-203
NM_172522	Megf11	2.79732	8.68758e-12	2.55959e-11
NM_198610	Igsf21	2.79312	2.74982e-07	6.49768e-07
NR_104044	Dgkh	2.792	3.8586e-44	2.29321e-43
NM_028872	5730559C18Rik	2.79149	0	0
NM_013691	Thbs3	2.79101	2.28421e-103	2.4881e-102
NM_011526	Tagln	2.79051	0	0
NM_173414	Lancl3	2.78821	2.38234e-13	7.42594e-13
NM_001271603	Socs1	2.78502	1.56069e-69	1.26765e-68
NM_001195710	Tmem95	2.7842	1.04459e-23	4.39502e-23
NM_009890	Ch25h	2.78288	3.85827e-151	5.68858e-150
NM_010740	Cd93	2.78256	5.74985e-266	1.52352e-264
NM_031191	Prl2c2	2.77986	0.00101835	0.00184499
NM_148941	Elovl4	2.77198	1.68548e-28	7.91543e-28
NM_001285425	Tcf24	2.76587	1.67253e-48	1.05804e-47
NM_194334	Tbc1d2b	2.76571	0	0
NM_182783	Fam167b	2.76465	6.41954e-17	2.25286e-16
NM_008663	Myo7a	2.76231	0	0
NM_001082483	Efr3b	2.75863	5.63849e-36	2.9949e-35
NM_016803	Chst3	2.75545	4.6112e-16	1.57435e-15
NM_177084	Slc9a4	2.75465	1.54028e-13	4.83657e-13
NM_001294162	Kcnh2	2.74976	3.93732e-10	1.07293e-09
NM_001205036	LOC100504608	2.74939	2.35339e-15	7.85855e-15
NM_010189	Fcgrt	2.73802	0	0
NM_001159518	Igfbp7	2.73697	0	0
NR_045932	Slfn5os	2.73493	1.22903e-15	4.13896e-15
NM_133746	Calhm2	2.73436	6.06275e-140	8.37264e-139
NM_177632	Fam43a	2.73158	4.26657e-230	9.74728e-229
NM_011125	Pltp	2.73051	0	0
NM_182716	Nfasc	2.72962	3.54382e-72	2.96808e-71
NM_001286557	Mtl5	2.7255	3.02955e-06	6.69689e-06
NM_008428	Kcnj8	2.72224	5.16916e-50	3.3551e-49
NM_001033135	Rnf149	2.72189	0	0
NM_011673	Ugcg	2.7208	0	0
NM_001048141	Bdnf	2.71724	1.31868e-57	9.34794e-57
NM_021436	Tmeff1	2.71618	0	0
NM_001190718	Dcaf12l1	2.70696	1.87535e-24	8.05562e-24
NM_010169	F2r	2.70665	0	0
NM_013867	Bcar3	2.70662	8.21366e-179	1.41084e-177
NM_007392	Acta2	2.7054	0	0
NM_001271589	Eps8	2.70416	5.76258e-275	1.60523e-273
NM_013460	Adra1d	2.70017	3.65531e-05	7.51555e-05
NM_009760	Bnip3	2.69982	1.54711e-59	1.12554e-58
NM_001004149	Zfp366	2.69551	4.3175e-08	1.06548e-07
NM_147220	Abca9	2.6932	1.33161e-31	6.62194e-31
NM_001204233	Spp1	2.69242	0	0
NM_001164225	Fbxl16	2.69143	3.97991e-21	1.57077e-20
NM_001291104	Fgf11	2.68953	1.10538e-60	8.11636e-60
NM_028877	Palm3	2.68527	1.35658e-06	3.07157e-06
NM_001099631	Sh2d5	2.67831	1.02941e-92	1.0331e-91
NM_009867	Cdh4	2.67759	1.53263e-08	3.86811e-08
NM_016762	Matn2	2.67591	3.9846e-190	7.34063e-189
NM_008469	Krt15	2.67285	1.64148e-08	4.13755e-08
NM_019564	Htra1	2.66913	0	0
NM_016846	Rgl1	2.66762	3.07258e-293	9.16773e-292
NM_021715	Chst7	2.66653	6.14283e-16	2.08826e-15
NM_008265	Hoxa4	2.65101	7.25472e-19	2.69307e-18
NM_007950	Ereg	2.65048	1.79583e-37	9.77681e-37
NM_175534	Mrgpre	2.65036	3.74545e-114	4.37586e-113
NM_053133	Pcdhb8	2.64876	2.86358e-11	8.2302e-11
NM_023655	Trim29	2.64791	1.4985e-51	9.92394e-51
NM_029646	Il34	2.64375	2.28665e-86	2.15798e-85
NM_001167988	Taf9b	2.64256	6.33392e-57	4.45579e-56
NM_145515	Mark1	2.64216	0	0
NM_008730	Nptx1	2.6388	3.79021e-05	7.78424e-05
NM_172788	Sh3rf3	2.636	7.48645e-30	3.6032e-29
NM_134117	Pkdcc	2.63545	9.0302e-187	1.62891e-185
NM_001256224	Wnt5a	2.63515	1.15624e-262	3.02888e-261
NM_011118	Prl2c3	2.62422	0.0120729	0.0195707
NM_011954	Prl2c4	2.62422	0.0120729	0.0195707
NM_177363	Tarm1	2.62055	1.38884e-05	2.9452e-05
NM_016964	Stag3	2.62033	1.41935e-08	3.58678e-08
NM_001003672	Pcdhac2	2.61512	1.22297e-50	7.99218e-50
NM_001083967	Tcf4	2.61293	0	0
NM_172412	Gpc2	2.60856	1.55039e-45	9.43695e-45
NM_010330	Emb	2.6059	0	0
NM_001015039	Zfyve28	2.60153	2.19765e-25	9.65426e-25
NM_001277132	Gm867	2.60117	3.6314e-48	2.28834e-47
NM_011430	Sncg	2.59847	3.50482e-15	1.16305e-14
NM_027322	Prrg1	2.59827	1.21391e-78	1.08147e-77
NM_021308	Piwil2	2.59759	1.62259e-20	6.28977e-20
NM_033079	M1ap	2.59552	8.22233e-32	4.10139e-31
NM_133982	Rpp25	2.59387	9.67824e-19	3.57642e-18
NM_145356	Zbtb7c	2.58939	1.06207e-83	9.85179e-83
NM_032396	Kremen1	2.58797	0	0
NM_023128	Palm	2.58441	0	0
NM_183195	Marveld1	2.58163	0	0
NM_001166065	Gcnt4	2.57838	2.27207e-177	3.88101e-176
NM_028749	Npl	2.57691	4.11657e-170	6.73662e-169
NM_146191	Lrrk1	2.57596	4.58636e-223	1.01512e-221
NM_010601	Kcnh3	2.57403	5.20616e-05	0.000105777
NM_175449	Fam26f	2.5731	2.12746e-07	5.05946e-07
NM_176860	Ubash3b	2.56747	5.80084e-118	6.98346e-117
NM_177066	Tnni3k	2.56372	1.62419e-05	3.42697e-05
NM_029056	Tdrd9	2.56257	1.87934e-14	6.09761e-14
NM_001081130	Ogdhl	2.56138	1.66833e-91	1.6575e-90
NM_080640	Baalc	2.5581	5.434e-11	1.54178e-10
NM_010789	Meis1	2.5579	3.88626e-86	3.66383e-85
NM_001111044	Serpinh1	2.55573	0	0
NM_029352	Dusp9	2.5553	1.24665e-95	1.27751e-94
NM_172944	Itgae	2.55499	3.90812e-12	1.16432e-11
NM_172418	Mamstr	2.55465	1.32608e-11	3.87238e-11
NM_025685	Col27a1	2.55457	4.50508e-169	7.33771e-168
NM_001035244	Trpm3	2.55191	2.21884e-05	4.6389e-05
NM_027760	Rassf8	2.55177	0	0
NM_007686	Cfi	2.54985	1.5024e-07	3.6039e-07
NM_008380	Inhba	2.54279	1.66634e-37	9.0754e-37
NM_183201	Slfn5	2.54121	1.61908e-246	3.95682e-245
NM_001159402	Upp1	2.54108	8.68015e-47	5.36723e-46
NR_046181	5430403N17Rik	2.53848	2.66515e-12	7.99343e-12
NM_016778	Bok	2.53827	2.87747e-88	2.77032e-87
NM_172928	Dclk3	2.537	0.000164152	0.000321283
NM_138683	Rspo1	2.53472	3.47349e-47	2.1579e-46
NM_001205234	Nrxn2	2.52965	5.40664e-05	0.00010973
NM_001277265	Tbxa2r	2.52091	0.00017604	0.000343725
NM_009154	Sema5a	2.51953	1.42541e-301	4.44461e-300
NR_045434	2900008C10Rik	2.51781	1.06055e-06	2.41691e-06
NM_001160012	Gjb3	2.51247	1.12305e-152	1.67364e-151
NM_172589	Lhfpl2	2.50786	0	0
NM_176921	6030419C18Rik	2.50761	7.03808e-188	1.28293e-186
NM_019911	Tdo2	2.50473	0.00041064	0.000773011
NR_024323	4930426L09Rik	2.50392	1.72434e-07	4.12022e-07
NM_018883	Camkk1	2.50375	1.36534e-72	1.14804e-71
NM_007823	Cyp4b1	2.49946	1.06679e-37	5.83644e-37
NM_011459	Serpinb8	2.49863	3.22995e-107	3.61935e-106
NM_008803	Pde8a	2.49505	3.01286e-150	4.41158e-149
NM_009403	Tnfsf8	2.4927	5.96545e-20	2.27079e-19
NM_001033217	Prickle1	2.4912	0	0
NM_029467	Tcam1	2.48747	8.93853e-05	0.000178378
NM_008482	Lamb1	2.48691	0	0
NM_080437	Celsr3	2.48322	8.2819e-15	2.71897e-14
NM_007726	Cnr1	2.48134	4.59058e-59	3.31876e-58
NM_013820	Hk2	2.46776	0	0
NM_177073	Relt	2.46775	2.20797e-67	1.75276e-66
NM_008630	Mt2	2.46712	3.13381e-79	2.80544e-78
NM_027972	Ccdc19	2.46637	2.09495e-10	5.78683e-10
NM_001243757	Pde2a	2.4627	0	0
NM_001081127	Adamts14	2.46227	3.27643e-52	2.18447e-51
NM_001178049	Mitf	2.46159	2.52215e-192	4.70275e-191
NM_001291004	H6pd	2.45661	0	0
NM_001159487	Rbp4	2.45155	2.06754e-77	1.82029e-76
NR_027963	Zfp783	2.44752	2.12022e-26	9.55048e-26
NM_001163318	Gm11744	2.44429	6.55603e-08	1.60476e-07
NM_021457	Fzd1	2.44399	0	0
NM_011197	Ptgfrn	2.44082	0	0
NM_009630	Adora2a	2.4385	4.95223e-16	1.68766e-15
NM_001081072	Slc27a6	2.43436	2.72945e-59	1.97998e-58
NM_178679	Zfp365	2.43318	6.82483e-20	2.59257e-19
NM_010170	F2rl2	2.43192	8.76812e-19	3.24573e-18
NM_001039562	Ankrd37	2.43172	2.46133e-51	1.62576e-50
NM_181074	Lingo1	2.42664	3.38773e-55	2.33748e-54
NM_153138	Wipf1	2.42588	0	0
NM_133990	Il13ra1	2.42463	0	0
NM_010737	Klrb1a	2.42035	1.01738e-27	4.70446e-27
NM_001029984	Fcrlb	2.41968	9.95358e-20	3.77024e-19
NM_001276403	Lef1	2.41699	1.98465e-32	9.9969e-32
NM_010929	Notch4	2.41632	1.33056e-253	3.35231e-252
NM_009955	Dpysl2	2.41571	8.29088e-134	1.10209e-132
NM_177388	Slc41a2	2.40924	2.05259e-300	6.37869e-299
NM_007514	Slc7a2	2.40873	0	0
NM_001099637	Cep170	2.40678	0	0
NM_010421	Hexa	2.40513	0	0
NR_045098	Gm2115	2.40268	8.01267e-08	1.95388e-07
NM_001177437	Mroh4	2.40259	0.000173219	0.000338599
NM_001048175	Adam28	2.40129	0.000153357	0.0003009
NM_183178	Fsd1	2.3958	2.26802e-05	4.7367e-05
NM_027529	6330409D20Rik	2.39301	6.912e-07	1.59422e-06
NM_207105	H2-Ab1	2.39253	2.03012e-39	1.13859e-38
NM_001170537	Mef2c	2.39177	4.18256e-77	3.66375e-76
NM_010296	Gli1	2.39129	6.13988e-10	1.65715e-09
NM_001127263	Trp63	2.38797	6.33052e-27	2.8693e-26
NM_001136076	P4ha2	2.38266	7.62754e-75	6.54678e-74
NM_008029	Flt4	2.38095	2.2213e-114	2.59846e-113
NM_019956	Krt71	2.37915	4.14651e-05	8.4908e-05
NM_001301309	Arhgdib	2.37579	4.94154e-245	1.20446e-243
NM_023788	Mageh1	2.37203	5.31815e-110	6.06734e-109
NR_027919	Bambi-ps1	2.37117	0.000127014	0.000250812
NM_010681	Lama4	2.36918	0	0
NM_026667	Fam114a1	2.36706	0	0
NM_007707	Socs3	2.36532	4.33555e-62	3.24014e-61
NM_177788	Exoc3l	2.36284	5.53661e-36	2.94191e-35
NM_173437	Nav1	2.36117	0	0
NM_172809	Sacs	2.35961	1.57741e-13	4.95091e-13
NM_001204340	Gucy1b2	2.35775	1.59402e-05	3.36461e-05
NM_010837	Map6	2.35721	6.38226e-218	1.37953e-216
NM_144891	Gdap1l1	2.35595	2.32595e-12	7.00187e-12
NM_001083918	Gm13139	2.35589	3.88353e-72	3.25162e-71
NM_138310	Apobr	2.35426	5.43547e-207	1.11236e-205
NM_011136	Pou2af1	2.35363	1.21932e-10	3.41166e-10
NM_011440	Sox14	2.34785	8.00948e-06	1.72722e-05
NM_010305	Gnai1	2.34659	4.62303e-49	2.95151e-48
NM_153155	C1ql3	2.34559	1.53124e-31	7.60648e-31
NR_015483	2610203C20Rik	2.34458	1.66818e-81	1.52092e-80
NM_016801	Stx1a	2.34382	3.16261e-74	2.6961e-73
NM_027153	Pir	2.3421	3.32178e-29	1.58117e-28
NM_001040072	Nynrin	2.34074	2.83209e-299	8.72277e-298
NR_040438	3110045C21Rik	2.33513	1.03586e-06	2.3624e-06
NM_080555	Ppap2b	2.33297	0	0
NM_028905	4932438H23Rik	2.33255	0.000809438	0.00148241
NM_009658	Akr1b3	2.33185	9.98131e-184	1.76709e-182
NR_037965	Gm6644	2.33185	9.98131e-184	1.76709e-182
NM_001081163	Chsy1	2.33183	0	0
NM_029784	Fam81a	2.3283	2.43476e-05	5.07116e-05
NM_172951	Sntg2	2.32714	1.55717e-06	3.51139e-06
NM_175493	Gpr68	2.32465	1.10099e-08	2.79809e-08
NM_007863	Mpp3	2.32418	3.66275e-05	7.53028e-05
NR_110411	Cox6b2	2.32139	2.65897e-07	6.2889e-07
NR_040675	1700095B10Rik	2.32104	4.81478e-05	9.80628e-05
NM_011173	Pros1	2.31691	0	0
NM_027222	Mzb1	2.3159	0.00108971	0.00196861
NM_009676	Aox1	2.30836	9.1951e-96	9.43324e-95
NM_001083904	Fetub	2.30786	4.0432e-07	9.45382e-07
NM_029023	Scpep1	2.3078	0	0
NM_001164797	Hephl1	2.30437	7.00764e-08	1.71394e-07
NM_001286020	Csn2	2.30314	5.92804e-06	1.2892e-05
NM_025779	Ccdc109b	2.29941	6.88415e-15	2.26464e-14
NM_019482	Panx1	2.29656	1.88431e-142	2.62581e-141
NM_020010	Cyp51	2.28987	3.08378e-254	7.79076e-253
NM_001033399	Gfod1	2.28934	6.89222e-137	9.33653e-136
NM_001252567	Sez6l2	2.2846	1.57031e-14	5.10871e-14
NM_008110	Gdf9	2.28392	1.16178e-06	2.64109e-06
NM_011577	Tgfb1	2.27947	0	0
NM_183103	Prss46	2.27938	4.32362e-05	8.83845e-05
NM_028593	Cybrd1	2.2777	3.83234e-22	1.55114e-21
NM_181397	Rftn1	2.27747	0	0
NM_008585	Mep1a	2.27673	5.94531e-05	0.000120274
NM_001004174	AA467197	2.27471	5.91493e-12	1.75127e-11
NM_138647	Cers1	2.27258	5.50018e-30	2.65321e-29
NR_073483	Aqp9	2.26938	4.27634e-98	4.47327e-97
NM_011322	Scn1b	2.26856	6.84827e-269	1.8554e-267
NR_045955	Scpep1os	2.26823	3.15351e-190	5.81343e-189
NM_010452	Hoxa3	2.26443	1.64539e-27	7.56671e-27
NM_019949	Ube2l6	2.26389	2.21651e-182	3.89423e-181
NM_016978	Oat	2.26331	0	0
NM_028156	1700001P01Rik	2.26176	0.000181988	0.000354639
NM_001163348	Ntng1	2.24946	3.58896e-64	2.73986e-63
NR_045723	E130310I04Rik	2.24621	4.05723e-09	1.05504e-08
NM_022413	Trpv6	2.23963	2.18499e-33	1.11686e-32
NM_001163282	Gdf1	2.23858	2.17219e-29	1.03771e-28
NM_008729	Ctnnd2	2.23628	2.80945e-15	9.36224e-15
NM_175366	Mex3b	2.23583	6.26943e-112	7.23008e-111
NM_001205076	Jph2	2.23505	1.23456e-15	4.15557e-15
NM_001127330	Pparg	2.23394	1.28645e-28	6.05173e-28
NM_001168564	Kcns3	2.23276	3.84176e-05	7.88602e-05
NM_001164704	Renbp	2.23274	1.13702e-272	3.13575e-271
NM_031258	Chrdl1	2.22943	2.03994e-07	4.85674e-07
NM_001204910	AI607873	2.22875	2.26643e-66	1.77827e-65
NM_052994	Spock2	2.22805	1.45384e-11	4.23607e-11
NM_138663	Pcdha12	2.21828	4.15547e-29	1.97529e-28
NM_027406	Aldh1l1	2.21496	1.39149e-90	1.36048e-89
NM_001130180	Tnnt2	2.21457	2.46462e-36	1.31768e-35
NM_001081668	Nup62cl	2.21452	1.71774e-05	3.61775e-05
NM_013922	Zfp354c	2.21344	1.24532e-72	1.04744e-71
NM_029921	Tmem213	2.21257	9.39747e-18	3.38194e-17
NM_001166388	Ptp4a3	2.21226	1.13781e-220	2.4905e-219
NM_153104	Phospho1	2.21068	3.15226e-47	1.96053e-46
NM_001102563	Prrt2	2.21021	3.39158e-24	1.44833e-23
NM_148927	Plekha4	2.2101	3.2585e-57	2.30048e-56
NM_011851	Nt5e	2.20894	1.29524e-297	3.94977e-296
NM_175532	Nlrp10	2.20655	2.84466e-09	7.45819e-09
NM_001077404	Nrp2	2.20618	0	0
NM_201243	Pcdha8	2.20539	5.13553e-31	2.52976e-30
NM_175668	Gpr4	2.20454	1.47465e-14	4.79919e-14
NM_178609	E2f7	2.20049	4.18429e-44	2.48571e-43
NM_007766	Pcdha4	2.19673	6.19136e-30	2.98403e-29
NR_033508	Gm11110	2.19608	6.57857e-26	2.92664e-25
NM_028000	Ppapdc1b	2.18887	0	0
NM_001114174	Fam189a2	2.18882	6.24093e-158	9.54725e-157
NM_001256161	9430069I07Rik	2.18767	3.19249e-11	9.15083e-11
NM_001291747	Xlr	2.18498	3.55927e-09	9.28514e-09
NM_013866	Zfp385a	2.1833	5.73036e-121	7.04564e-120
NM_011032	P4hb	2.18297	0	0
NM_178396	Car12	2.18227	2.43564e-267	6.54762e-266
NM_010942	Nsg1	2.17938	1.32796e-27	6.12628e-27
NM_001301232	Rab27a	2.17794	1.75615e-186	3.15753e-185
NM_153504	Rnf183	2.17793	6.91839e-07	1.59543e-06
NM_198301	Fam105a	2.17773	3.31084e-63	2.5027e-62
NM_001199210	Eva1c	2.17238	2.35993e-09	6.21261e-09
NM_011175	Lgmn	2.17172	0	0
NM_053140	Pcdhb15	2.17054	1.36524e-17	4.88909e-17
NM_001285890	Pde1b	2.16995	3.0974e-14	9.96792e-14
NM_177657	D630003M21Rik	2.1678	1.84331e-12	5.56713e-12
NM_017369	Gabre	2.16749	4.64635e-18	1.68703e-17
NR_030547	Mir147	2.16656	1.67566e-05	3.53126e-05
NM_007553	Bmp2	2.16407	2.16066e-131	2.82868e-130
NM_198642	5031414D18Rik	2.16317	1.75532e-09	4.64745e-09
NM_001029978	Tceal3	2.16312	1.68269e-08	4.23873e-08
NM_001199696	Bai2	2.16233	1.38651e-11	4.04459e-11
NM_001190373	Kcng2	2.162	7.14076e-05	0.000143619
NM_172920	Dpy19l1	2.16155	0	0
NM_009959	Pcdha5	2.15408	6.73848e-28	3.12585e-27
NM_033041	Hes7	2.15001	9.87596e-06	2.11489e-05
NM_019656	Tspan6	2.14555	2.15598e-162	3.37843e-161
NM_001256005	Gbp4	2.14238	1.0375e-08	2.64013e-08
NM_177271	Samd5	2.14175	8.30848e-21	3.25072e-20
NM_144808	Slc39a14	2.14136	0	0
NM_007767	Pcdha6	2.13819	1.28599e-27	5.93561e-27
NM_133193	Il1rl2	2.13698	1.47145e-192	2.75104e-191
NR_038009	2810408I11Rik	2.13569	1.52021e-15	5.10218e-15
NM_028266	Col16a1	2.1356	0	0
NM_138662	Pcdha3	2.13262	1.51611e-27	6.97798e-27
NM_009957	Pcdha7	2.13103	1.48786e-27	6.85479e-27
NM_144916	Tmem150a	2.12993	3.18839e-156	4.81896e-155
NM_001003671	Pcdhac1	2.12853	2.19097e-27	1.00357e-26
NM_009960	Pcdha11	2.12796	1.51163e-27	6.96083e-27
NM_178697	Clca5	2.12606	2.31373e-05	4.82852e-05
NM_054072	Pcdha1	2.12572	1.38829e-27	6.40139e-27
NM_009259	Spn	2.1251	1.464e-32	7.3891e-32
NR_027907	AI414108	2.12419	3.7861e-08	9.371e-08
NM_175088	Mdfic	2.12369	0	0
NM_018881	Fmo2	2.1225	2.56189e-96	2.63507e-95
NM_198111	Akap6	2.12204	1.80745e-10	5.01218e-10
NM_001170985	Kirrel	2.12133	0	0
NM_019861	Ctsf	2.12087	0	0
NM_016689	Aqp3	2.12069	1.65836e-06	3.72926e-06
NM_027587	Micalcl	2.11999	2.135e-11	6.17594e-11
NM_178365	Pacsin1	2.11976	2.9787e-08	7.41102e-08
NM_001252470	Cpt1c	2.11891	3.35027e-102	3.61801e-101
NM_001289670	Arhgap33	2.1188	8.61164e-70	7.01317e-69
NM_001042779	Sema3b	2.11446	2.50403e-42	1.45997e-41
NM_029270	Arhgap24	2.11184	4.98119e-118	5.99931e-117
NM_010588	Jag2	2.10838	7.36766e-58	5.23757e-57
NM_008845	Pip4k2a	2.10723	8.31811e-275	2.31478e-273
NM_025659	Abi3	2.10487	3.96954e-49	2.53547e-48
NM_008903	Ppap2a	2.1033	2.20011e-154	3.30183e-153
NM_001109873	Cbfa2t3	2.09253	1.22199e-40	6.95063e-40
NR_037269	Mir466n	2.09005	1.62897e-21	6.4964e-21
NM_011718	Wnt10b	2.08998	0.000741083	0.00136182
NM_013584	Lifr	2.08234	6.85501e-107	7.66284e-106
NR_028385	Gm10190	2.08222	0.000757562	0.0013909
NM_001042528	Cacna1b	2.08218	0.000115146	0.000228158
NM_144538	Rab3il1	2.08212	4.69109e-68	3.74867e-67
NM_011267	Rgs16	2.08151	6.59972e-163	1.03712e-161
NM_027342	Fam162a	2.08143	3.27904e-45	1.98456e-44
NM_001164663	Soga1	2.07953	1.7605e-252	4.41944e-251
NM_001194940	Dlc1	2.07801	1.25678e-283	3.64387e-282
NM_001168403	Ankrd55	2.07516	0.000150675	0.000295827
NM_001114597	Ehbp1l1	2.07354	0	0
NM_008967	Ptgir	2.07322	3.75398e-53	2.52659e-52
NM_001101483	Slc35g2	2.07194	2.41415e-07	5.72847e-07
NM_011242	Rasgrp2	2.07087	9.9058e-06	2.12095e-05
NM_178405	Atp1a2	2.06981	1.03988e-09	2.78035e-09
NM_015732	Axin2	2.06885	4.99142e-124	6.24808e-123
NM_011763	Zfp9	2.06837	3.78018e-150	5.52637e-149
NM_023903	Lipm	2.06685	3.93812e-22	1.59349e-21
NM_026640	Fam111a	2.06665	2.80132e-169	4.57075e-168
NM_001081651	Rab42	2.06649	6.0021e-14	1.91091e-13
NM_001110160	Lrrc61	2.06363	1.82993e-13	5.72718e-13
NM_009147	Sec23a	2.06353	0	0
NM_001205336	Arap3	2.05796	1.38753e-71	1.15512e-70
NM_177620	Rin3	2.05781	3.44332e-76	2.98972e-75
NM_153511	Il1f9	2.05592	1.90829e-08	4.79262e-08
NM_001190491	Dmpk	2.05548	6.16452e-95	6.29386e-94
NM_001272052	Ada	2.0496	9.02553e-74	7.66588e-73
NM_001146711	Ppp1r18	2.04425	0	0
NM_001004363	Nuak1	2.04107	0	0
NM_001002008	Zfp948	2.03787	3.40105e-68	2.72409e-67
NM_053201	Magee1	2.03715	3.88547e-88	3.73818e-87
NM_026336	2310057J18Rik	2.03104	3.44787e-09	9.00133e-09
NM_001001160	Fbxo41	2.02867	0.000691169	0.0012739
NR_030483	Mir702	2.02209	5.72031e-109	6.48075e-108
NM_053273	Ttyh2	2.021	7.59531e-240	1.80676e-238
NM_001202500	Armcx4	2.02023	1.07967e-226	2.42655e-225
NM_009104	Rrm2	2.01592	2.08909e-138	2.85512e-137
NM_011333	Ccl2	2.01522	1.64139e-30	7.99306e-30
NM_001161665	Kif26b	2.01437	0	0
NM_183408	Pde4a	2.01384	7.76158e-107	8.66924e-106
NM_172619	Adamts10	2.01345	2.40993e-133	3.19276e-132
NM_026516	Tmem178	2.00749	0.000216845	0.000418851
NM_176830	Leprel4	2.0074	8.5966e-238	2.0362e-236
NM_172784	Lrp11	2.00697	1.3921e-58	9.99371e-58
NM_053141	Pcdhb16	2.00469	1.58975e-77	1.40142e-76
NM_025378	Ifitm3	2.00283	0	0
NR_040286	Gm11627	2.00217	2.55707e-06	5.67511e-06
NM_172856	Cers6	2.00142	3.22585e-114	3.77039e-113
NM_181390	Mustn1	2.00116	3.03986e-11	8.72958e-11
NM_008371	Il7	2.00041	2.43687e-14	7.87885e-14
NM_001204914	Reep2	1.99954	1.0129e-06	2.31251e-06
NM_145079	Ugt1a6a	1.99921	5.44785e-112	6.29047e-111
NM_010959	Oit3	1.9976	8.64894e-09	2.20964e-08
NM_031183	Sp6	1.99653	1.19529e-27	5.51884e-27
NM_001163793	C530008M17Rik	1.996	1.75536e-12	5.30613e-12
NM_001146080	Cntfr	1.9935	1.43552e-17	5.1374e-17
NR_045780	Zfp652os	1.98905	0.0031178	0.00539623
NM_153788	Acap1	1.98872	1.29547e-16	4.50122e-16
NM_198037	Cachd1	1.98802	2.109e-177	3.60469e-176
NM_023284	Nuf2	1.9877	4.82486e-60	3.52495e-59
NM_008378	Impact	1.98227	7.57259e-186	1.35889e-184
NM_007563	Bpgm	1.98063	1.96708e-259	5.10942e-258
NM_011350	Sema4f	1.97955	4.5325e-12	1.34729e-11
NM_026561	Nt5c3b	1.97933	5.52169e-259	1.42888e-257
NM_007633	Ccne1	1.97896	9.24059e-69	7.45304e-68
NM_144526	Fam64a	1.97649	8.97542e-47	5.54857e-46
NM_008964	Ptger2	1.97388	3.52634e-41	2.02071e-40
NM_033583	Pcdhgc5	1.97385	0	0
NM_009050	Ret	1.97198	7.90922e-29	3.74037e-28
NM_008077	Gad1	1.96919	3.43663e-05	7.07748e-05
NM_009201	Slc1a5	1.96775	1.73507e-243	4.20687e-242
NR_027808	Zfp862-ps	1.96732	7.23041e-212	1.51439e-210
NM_019681	Ncs1	1.96675	3.90973e-248	9.63994e-247
NM_145100	Lypd1	1.9665	3.16576e-20	1.21521e-19
NM_008304	Sdc2	1.96502	0	0
NM_172508	Dse	1.96001	3.41959e-301	1.06507e-299
NM_023121	Gngt2	1.95652	3.51821e-27	1.60461e-26
NR_033139	AI427809	1.95395	2.49067e-39	1.39491e-38
NM_027712	Dlgap1	1.95112	9.17954e-12	2.70166e-11
NM_013566	Itgb7	1.94999	6.04185e-06	1.31354e-05
NM_011519	Sdc1	1.94998	0	0
NM_011962	Plod3	1.94922	0	0
NM_033593	Pcdhga10	1.94415	0	0
NM_178595	Ptrh1	1.94368	3.32919e-119	4.0413e-118
NM_001081656	Neurl1b	1.94234	3.62443e-24	1.54562e-23
NM_021704	Cxcl12	1.94154	7.27553e-120	8.87063e-119
NM_001290728	Sytl5	1.9394	3.6246e-23	1.50557e-22
NM_033594	Pcdhga11	1.93819	0	0
NM_033327	Zfp423	1.93617	1.75773e-17	6.26944e-17
NM_201410	Ugt1a6b	1.93359	5.47807e-97	5.66613e-96
NM_183221	Fat4	1.93094	1.239e-109	1.41063e-108
NM_019802	Ggcx	1.92395	2.81174e-232	6.50413e-231
NM_032397	Kcnn1	1.92239	2.49937e-22	1.01683e-21
NM_033577	Pcdhgb5	1.9219	0	0
NM_181039	Lphn1	1.92048	1.76172e-180	3.04306e-179
NM_033580	Pcdhgb8	1.91927	0	0
NM_001033525	Kcnk6	1.9171	2.71048e-31	1.34282e-30
NM_008885	Pmp22	1.91697	1.65878e-80	1.49707e-79
NM_033579	Pcdhgb7	1.91621	0	0
NM_027875	Syde1	1.9151	4.90454e-159	7.55713e-158
NM_033591	Pcdhga8	1.91328	0	0
NM_009961	Pcdha10	1.91279	4.68161e-29	2.22272e-28
NM_001162432	Lck	1.91235	2.31717e-11	6.69031e-11
NM_033588	Pcdhga5	1.91211	0	0
NM_009976	Cst3	1.91184	0	0
NM_181395	Pxdn	1.91175	0	0
NM_001033238	Cblb	1.9116	0	0
NM_011858	Tenm4	1.90971	5.61155e-90	5.45569e-89
NM_019483	Smad9	1.90919	0.00153184	0.00272977
NM_033584	Pcdhga1	1.90881	0	0
NM_001162917	Dennd4a	1.9058	3.8813e-281	1.11252e-279
NM_033595	Pcdhga12	1.90492	0	0
NM_001144992	2810459M11Rik	1.90424	7.72676e-13	2.36719e-12
NM_011299	Rps6ka2	1.90007	6.63916e-145	9.36007e-144
NM_033587	Pcdhga4	1.89991	0	0
NM_173047	Cbr3	1.89849	2.07947e-37	1.13054e-36
NM_029575	Tgfbr2	1.89829	0	0
NM_033589	Pcdhga6	1.89609	0	0
NM_033585	Pcdhga2	1.89549	0	0
NM_183185	Zfp300	1.89477	2.73845e-07	6.47248e-07
NM_198117	Pcdha2	1.89314	1.76288e-23	7.37793e-23
NM_201641	Ugt1a10	1.893	2.34994e-91	2.32716e-90
NM_201643	Ugt1a5	1.893	2.34994e-91	2.32716e-90
NM_013701	Ugt1a2	1.893	2.34994e-91	2.32716e-90
NM_027868	Slc41a3	1.89267	3.47237e-82	3.1805e-81
NM_201645	Ugt1a1	1.89204	3.0151e-91	2.98054e-90
NR_024326	9130024F11Rik	1.89089	1.07372e-05	2.29383e-05
NM_001174154	Pcdha4-g	1.89039	0	0
NM_174995	Mgst2	1.89025	3.56319e-09	9.2945e-09
NM_176839	Abcc5	1.88997	3.01678e-42	1.75708e-41
NM_177364	Sh3pxd2b	1.88932	0	0
NM_008026	Fli1	1.88918	1.42205e-26	6.42125e-26
NM_001301256	Pcdha6-g	1.88895	0	0
NM_001301259	Pcdha7-g	1.88879	0	0
NM_001143776	Fam13c	1.88617	4.75179e-09	1.23137e-08
NM_201644	Ugt1a9	1.88597	4.37384e-91	4.30681e-90
NM_033592	Pcdhga9	1.88409	0	0
NM_019395	Fbp1	1.88018	6.64612e-14	2.1111e-13
NM_033578	Pcdhgb6	1.87986	0	0
NM_033582	Pcdhgc4	1.87954	0	0
NM_033581	Pcdhgc3	1.87923	0	0
NM_011171	Procr	1.87875	7.40247e-56	5.14476e-55
NM_001008231	Daam2	1.87842	1.44059e-38	7.97131e-38
NM_008116	Ggt1	1.87612	3.60829e-17	1.27746e-16
NM_173743	Apol9b	1.87466	1.41506e-21	5.64901e-21
NM_015774	Ero1l	1.87406	2.31916e-19	8.72014e-19
NM_007651	Cd53	1.87234	2.95592e-121	3.64248e-120
NM_001253364	Kcnma1	1.87028	3.29633e-19	1.23441e-18
NM_001276371	Whrn	1.86933	6.05534e-66	4.72033e-65
NM_053082	Tspan4	1.86764	0	0
NM_023275	Rhoj	1.86736	4.50989e-135	6.03258e-134
NM_033586	Pcdhga3	1.86735	0	0
NM_145586	Tmem159	1.8658	5.03888e-101	5.39318e-100
NM_026509	Murc	1.86555	1.50262e-10	4.18657e-10
NM_011812	Fbln5	1.86527	4.47091e-300	1.38473e-298
NM_008207	H2-T24	1.86516	2.02475e-08	5.07959e-08
NM_033590	Pcdhga7	1.86091	0	0
NM_145532	Mall	1.86071	2.08543e-10	5.76109e-10
NM_026418	Rgs10	1.85961	1.25153e-45	7.62123e-45
NM_016767	Batf	1.85874	2.68576e-11	7.72393e-11
NM_029981	Adamtsl2	1.8584	4.86183e-20	1.85503e-19
NR_026944	Gm10941	1.85794	1.02103e-05	2.18447e-05
NM_009466	Ugdh	1.85776	8.59865e-218	1.85571e-216
NM_001164109	Nfatc1	1.85749	1.94827e-115	2.29361e-114
NM_019511	Ramp3	1.85726	1.32452e-05	2.81225e-05
NM_001171801	Triqk	1.8565	8.58335e-30	4.12755e-29
NM_011527	Tal1	1.85179	2.90025e-06	6.41773e-06
NM_134116	Gpsm3	1.84924	1.98486e-147	2.83878e-146
NM_011055	Pde3b	1.8482	7.82519e-79	6.98265e-78
NM_011451	Sphk1	1.84647	1.51105e-240	3.60064e-239
NM_175092	Rhof	1.84637	0.00015227	0.000298894
NM_026725	Dusp23	1.84625	9.20736e-38	5.04338e-37
NM_001164820	Slc52a3	1.84542	1.72519e-27	7.92711e-27
NM_011150	Lgals3bp	1.83943	2.42092e-202	4.79492e-201
NR_045450	Gm11413	1.83917	0.000679386	0.00125293
NM_009183	St8sia4	1.83643	2.20709e-47	1.37609e-46
NM_001001492	Lca5l	1.8356	1.52665e-08	3.85338e-08
NM_011361	Sgk1	1.83463	0	0
NM_028030	Rbpms2	1.83398	1.51887e-54	1.04124e-53
NM_033575	Pcdhgb2	1.83285	0	0
NM_133706	Tmem97	1.83269	8.11729e-102	8.73871e-101
NM_001024645	Lrrc16b	1.8292	5.6858e-05	0.000115184
NM_153143	Kctd11	1.82875	7.86587e-265	2.07625e-263
NM_178066	Tmem198b	1.82757	6.56413e-206	1.33251e-204
NM_033574	Pcdhgb1	1.8243	0	0
NM_011121	Plk1	1.82211	2.07007e-67	1.64377e-66
NM_010161	Evi2a	1.81963	1.65293e-48	1.04612e-47
NM_133738	Antxr2	1.81834	1.9879e-138	2.71818e-137
NM_007941	Stx2	1.81595	9.31934e-205	1.87804e-203
NM_009878	Cdkn2d	1.81513	2.37248e-81	2.15736e-80
NM_001081433	Ankrd44	1.81293	3.24349e-77	2.84386e-76
NM_011313	S100a6	1.81258	1.90058e-272	5.23113e-271
NM_001163687	Naaa	1.81239	1.35981e-81	1.241e-80
NM_029823	Arxes2	1.81157	5.74683e-22	2.31824e-21
NM_033576	Pcdhgb4	1.81145	0	0
NM_001172093	Depdc1a	1.811	1.35451e-14	4.41445e-14
NM_001163170	Lix1l	1.80984	0	0
NM_021432	Nap1l5	1.80968	3.44115e-05	7.08521e-05
NM_027975	Fam83d	1.80516	3.89593e-38	2.14462e-37
NM_021362	Pappa	1.804	5.28101e-28	2.45634e-27
NM_008869	Pla2g4a	1.79875	0	0
NM_025998	Nkain1	1.79739	1.8336e-254	4.63657e-253
NM_181796	Gstp2	1.79664	1.59221e-05	3.36155e-05
NM_023680	Tnfrsf22	1.7964	8.10431e-37	4.37001e-36
NR_040355	Znf41-ps	1.79624	2.1258e-45	1.29252e-44
NM_144797	Metrnl	1.79612	6.24876e-160	9.66063e-159
NM_009196	Slc16a1	1.79521	8.46243e-244	2.05541e-242
NM_001201413	Apbb2	1.79443	1.16605e-225	2.6122e-224
NM_011157	Srgn	1.79395	1.71503e-21	6.8357e-21
NM_172488	Lacc1	1.79164	9.87318e-33	4.99778e-32
NM_023061	Mcam	1.79063	1.20224e-166	1.92643e-165
NM_138661	Pcdha9	1.78905	5.05706e-23	2.09336e-22
NM_170597	Creg2	1.78818	3.7937e-23	1.57534e-22
NM_028672	Fam161a	1.78595	2.58315e-17	9.17573e-17
NM_001291184	Pcsk6	1.78579	2.29337e-107	2.5709e-106
NM_010848	Myb	1.78259	1.70504e-11	4.95236e-11
NM_001163548	Cyth3	1.78255	1.03613e-227	2.34389e-226
NM_172646	Dnm3	1.78107	4.17299e-25	1.81676e-24
NM_010451	Hoxa2	1.77944	3.58447e-05	7.37428e-05
NM_027135	Sec24d	1.77907	0	0
NM_010205	Fgf8	1.77424	0.00123783	0.00222503
NM_001033323	Igsf9b	1.77321	0.00015329	0.00030081
NM_011746	Mkrn3	1.77299	5.67505e-09	1.46378e-08
NM_023294	Ndc80	1.77225	5.85687e-45	3.52699e-44
NM_011994	Abcd2	1.76985	1.75802e-25	7.74754e-25
NM_201642	Ugt1a7c	1.76842	1.18706e-97	1.23473e-96
NM_018861	Slc1a4	1.76718	6.07726e-230	1.38497e-228
NM_053267	Selm	1.76567	1.32018e-196	2.52971e-195
NM_010149	Epor	1.76474	0.000179609	0.000350299
NM_001013028	Tmem263	1.76413	4.3742e-219	9.4845e-218
NM_021400	Prg4	1.76381	2.64255e-24	1.13073e-23
NM_201361	Rmdn2	1.76322	3.02254e-55	2.08654e-54
NM_145628	Usp11	1.76155	7.31703e-38	4.01349e-37
NM_178874	Tmcc2	1.76143	4.01385e-102	4.33123e-101
NM_029948	Pramef12	1.75581	1.10243e-09	2.94475e-09
NM_010235	Fosl1	1.75427	3.04897e-94	3.09695e-93
NM_010431	Hif1a	1.75409	0	0
NM_172862	Frem2	1.75355	1.80452e-18	6.61967e-18
NM_033622	Tnfsf13b	1.75295	1.16294e-14	3.79992e-14
NM_029942	Prelid2	1.75224	8.17826e-31	4.01077e-30
NM_144935	Lppr2	1.74902	1.59433e-75	1.37482e-74
[truncated: 876 more rows]

## Sheet: STable 2 (SFig 1B)
Enrichr analysis DEGs in MMTV-HER2 early lesion (EL) and primary tumor (PT) 7-day spheres bulk RNAseq. Partially showed on Figure S1B.
UP genes (EL vs. PT)		p<0.05 + FC>2 : 2873 DEGs
BioPlanet 2019
Term	Overlap	P-value	Adj P-value	Old P-value	Old Adjusted P-value	Odds Ratio	Combined Score	Genes
TGF-beta regulation of extracellular matrix	175/565	1.19632e-24	1.80644e-21	0	0	2.15617	118.768	SERPINE1;TNC;PLOD2;IFIT3;RGS4;CDH5;RGS5;CDH4;FGF7;EFEMP1;DPYSL2;TNFSF10;CYP1B1;FADS1;PDGFRA;MAP2K1;POSTN;IL1R1;HGF;F2R;PDGFRL;PDIA5;CDC25B;INPP4B;SFRP4;COL4A2;LOX;MTHFD2;COL8A2;TRIB3;PLA2R1;STEAP2;KCNE3;GYPC;SHC1;PDE1A;LPAR1;MGST2;STC1;LPL;FBLN1;SLC1A4;AEBP1;NID2;FBLN5;FUT4;UGCG;C7;SSR1;NPTX2;GPM6B;PCK2;B3GALNT1;EGR2;JAG1;TGFB1;VCAM1;DENND4A;LHFP;CAV1;TFPI2;FN1;MICAL2;CDC6;NR2F2;IGF1;INHBA;COL1A1…
Extracellular matrix organization	53/93	1.21163e-21	9.1478e-19	0	0	3.96723	191.071	COL18A1;COL16A1;COL14A1;COL12A1;PLOD3;PLOD2;PLOD1;ADAMTS2;TIMP2;TIMP1;TPSAB1;COL27A1;COL25A1;LEPRE1;MMP2;COL23A1;MMP3;PCOLCE;MMP8;MMP9;MMP10;MMP11;MMP14;MMP13;COL4A2;COL4A1;COL6A2;COL6A1;MMP17;COL8A2;COL6A3;COL8A1;COL6A5;COL17A1;COL15A1;COL13A1;PCOLCE2;ADAMTS14;SERPINH1;COL28A1;CRTAP;COL24A1;COL1A1;COL3A1;BMP1;COL1A2;COL5A1;LEPREL2;COL5A3;COL7A1;COL5A2;TLL1;P4HB
Collagen biosynthesis and modifying enzymes	41/64	1.04825e-19	5.27617e-17	0	0	4.45962	194.894	COL17A1;COL18A1;COL15A1;COL16A1;COL13A1;PCOLCE2;COL14A1;COL12A1;PLOD3;PLOD2;PLOD1;ADAMTS2;ADAMTS14;SERPINH1;COL28A1;CRTAP;COL27A1;COL24A1;COL25A1;LEPRE1;COL23A1;PCOLCE;COL1A1;COL3A1;BMP1;COL1A2;COL4A2;COL5A1;COL4A1;LEPREL2;COL6A2;COL5A3;COL7A1;COL6A1;COL5A2;COL8A2;COL6A3;COL8A1;TLL1;COL6A5;P4HB
ECM-receptor interaction	46/84	5.01557e-18	1.89338e-15	0	0	3.81218	151.854	TNXB;ITGB5;LAMA2;LAMC3;LAMA1;ITGB3;LAMA4;SDC2;LAMA3;TNC;LAMC1;HMMR;THBS2;THBS4;THBS3;VTN;RELN;SV2C;TNN;SV2A;SPP1;TNR;ITGAV;ITGB7;GP1BB;LAMB2;ITGA1;FN1;LAMB1;HSPG2;COL1A1;COL3A1;COL1A2;COL4A2;COL5A1;COL4A1;COL6A2;COL5A3;COL6A1;COL5A2;ITGA11;COL6A3;ITGA7;SDC1;ITGA5;ITGA9
Beta-1 integrin cell surface interactions	40/66	5.33588e-18	1.61143e-15	0	0	4.21901	167.799	COL18A1;LAMA2;LAMA1;LAMA4;LAMA3;TNC;F13A1;LAMC1;NID1;THBS2;VTN;MDK;PLAU;SPP1;ITGAV;JAM2;VCAM1;LAMB2;FGG;ITGA1;FN1;LAMB1;VEGFA;COL1A1;COL3A1;COL1A2;COL5A1;COL4A1;COL6A2;COL7A1;COL6A1;COL5A2;ITGA11;COL6A3;ITGA7;CSPG4;ITGA5;TGFBI;ITGA9;FBN1
Axon guidance	103/325	9.62554e-16	2.42243e-13	0	0	2.20622	76.2842	SEMA5A;SEMA5B;PLXND1;RPS6KA4;ALCAM;RGS3;DPYSL2;RPS6KA2;DPYSL3;PLXNC1;EPHB2;EPHB1;SCN1B;SEMA6B;MAP2K1;UNC5A;UNC5B;SEMA6D;ANK2;UNC5C;UNC5D;CACNB2;COL4A2;COL4A1;KCNQ3;PRKCQ;EPHA3;SEMA7A;AGAP2;CACNA1C;CACNA1H;CACNA1G;ST8SIA4;PLXNA2;MYH11;SCN3B;LRRC4C;PLXNA4;NTNG1;PRNP;ST8SIA2;NFATC1;NFATC4;COL1A1;COL1A2;CXCL12;EFNA2;COL5A1;GDNF;ARTN;DLG4;COL5A2;CDK1;CNTN1;CNTN2;SCN2B;FGFR1;ROBO2;NRP1;NRP2;CNTNAP1;ITG…
Glycosaminoglycan metabolism	50/110	4.11265e-15	8.87158e-13	0	0	3.16426	104.815	B4GALT2;CHPF;HEXA;GXYLT2;HS6ST2;HS6ST3;NAGLU;NDST3;DSE;CSGALNACT1;CHST7;CHPF2;ABCC5;BGN;KERA;HSPG2;DCN;VCAN;CHST1;CHST5;CHST2;B4GALT5;CHST3;SDC2;HMMR;CHST11;CHSY1;CHST12;GPC1;HAS1;CHST15;ST3GAL4;GPC3;GPC2;HAS2;CHST13;CHSY3;CHST14;GPC6;ST3GAL2;LUM;HS3ST5;LYVE1;EXT1;GLB1;UST;SDC1;CSPG4;HPSE;FMOD
BDNF signaling pathway	82/261	1.3636e-12	2.57379e-10	0	0	2.1871	59.7534	ITGB5;MAST4;GBE1;SERPINE1;ADM;PLAT;AQP3;FGF2;PEG10;DPYSL3;BDKRB2;TIMP1;UPP1;PTRF;FADS1;PPP1R16B;IL11;PDGFRA;MAP2K1;IGFBP4;HGF;IGFBP3;EMP3;KIF22;SLC39A14;GEM;TGFBR2;UGDH;GAP43;VCAN;GAL;ZEB1;VSNL1;DDIT3;PXDN;CDH11;BIRC5;S100A4;ROR2;TAGLN;PTGER2;SEMA3A;LAMA3;GATA2;NTS;PTGS1;NUAK1;C7;SERPINH1;SPP1;SSR1;H1FX;SLIT3;FLNC;PDLIM4;JAM3;TFAP2B;EGR2;GADD45A;TPBG;TFPI2;IGF2;GNG11;VEGFA;NR4A2;CENPF;KRT19;BMP2;…
Oncostatin M	92/311	2.85075e-12	4.78292e-10	0	0	2.05931	54.7436	ECM2;SERPINE1;HP;TNC;PCSK9;CALML3;PLAT;GRIK2;PRDM1;CXCL5;HK2;ICAM1;ADAMTS4;HOXA9;CDH3;PLAU;CASP4;TIMP2;ITGAV;TIMP1;SKP2;SLC16A3;CAMP;KRT6B;CTSB;IL13RA1;KRT6A;IL11;SERPINB2;MUSK;IL1R1;TNNC1;HGF;MMP2;F2R;MMP3;PLA2G4A;RNASE4;LIFR;PCOLCE;RUNX2;PGF;CH25H;MMP13;CDH11;FETUB;PPARG;IL6ST;STEAP1;MGLL;S100A8;FBN2;CCL11;EPAS1;RGS16;LPL;HIF1A;AURKA;SRM;HSD11B1;SELENBP1;HSD11B2;SOCS3;VTN;LDHA;NUAK1;CCNB1;SOCS1…
Integrin cell surface interactions	39/85	2.92476e-12	4.4164e-10	0	0	3.19404	84.8266	ITGB5;LAMA2;LAMC3;LAMA1;SHC1;ITGB3;ICAM2;TNC;ITGAE;LAMC1;RASGRP2;ICAM1;VTN;BSG;SPP1;ITGAV;ITGB7;AMICA1;JAM2;JAM3;VCAM1;LAMB2;FGG;ITGA1;FN1;LAMB1;APBB1IP;COL1A1;COL1A2;COL4A2;COL4A1;ITGA11;PECAM1;ITGA7;ITGA5;RAPGEF3;ITGA9;RAPGEF4;FBN1
KEGG 2019 Mouse
Term	Overlap	P-value	Adj P-value	Old P-value	Old Adjusted P-value	Odds Ratio	Combined Score	Genes
ECM-receptor interaction	42/83	5.83028e-15	1.76658e-12	0	0	3.52262	115.456	TNXB;ITGB5;LAMA2;LAMC3;LAMA1;ITGB3;LAMA4;LAMA3;TNC;LAMC1;HMMR;THBS2;THBS4;THBS3;VTN;RELN;SV2C;TNN;SV2A;SPP1;TNR;ITGAV;ITGB7;GP1BB;LAMB2;ITGA1;FN1;LAMB1;HSPG2;COL1A1;COL1A2;COL4A2;COL4A1;COL6A2;COL6A1;ITGA11;ITGA7;COL6A3;SDC1;ITGA5;COL6A5;ITGA9
Pathways in cancer	133/535	5.72798e-11	8.67789e-09	0	0	1.73058	40.8124	CALML3;FGF2;FGF5;FGF7;EDNRA;FGF8;EDNRB;CCND2;PEG12;SKP2;IL13RA1;PDGFRB;IL15RA;PDGFRA;MAP2K1;PRKCB;HGF;F2R;WNT5A;MITF;PGF;EML4;COL4A2;COL4A1;CCNE1;IL6ST;EPAS1;NOTCH4;TCF7;IL4RA;LPAR1;MGST2;LPAR3;LPAR4;RASGRP2;HIF1A;KNG2;GNG10;HMOX1;PMAIP1;WNT2;FGF21;WNT4;FZD1;JAG2;WNT10B;WNT10A;GSTM2;FZD2;JAG1;TGFB1;GADD45A;PTCH2;FN1;IGF2;IGF1;GNG11;BMP4;BMP2;IL6;CXCL12;IL7;FGF18;GNB4;FGFR1;FGF10;RET;MMP1B;LAMC3;F…
PI3K-Akt signaling pathway	96/357	3.45667e-10	3.49124e-08	0	0	1.87196	40.7817	ITGB5;LAMC3;FLT4;ITGB3;TNC;LAMC1;FGF2;FGF5;GYS1;FGF7;GNGT2;CCND2;FGF8;CREB3L3;TNN;CREB3L1;MYB;CREB3L2;KDR;TNR;ITGAV;ITGB7;JAK2;PDGFRB;PDGFRA;MAP2K1;HGF;F2R;MAGI2;ITGA1;PGF;EREG;COL4A2;COL4A1;CCNE1;COL6A2;COL6A1;IL3RA;COL6A3;ITGA7;COL6A5;ITGA5;SGK1;ITGA9;TNXB;LAMA2;LAMA1;LAMA4;LAMA3;LPAR1;IL4RA;LPAR3;LPAR4;THBS2;THBS4;THBS3;VTN;GNG10;RELN;GNG2;GNG4;SPP1;GNG8;PCK2;FGF21;NTRK1;NGFR;ANGPT4;NTRK2;ANGP…
Protein digestion and absorption	35/90	8.70268e-09	6.59228e-07	0	0	2.7072	50.2446	COL17A1;COL18A1;COL15A1;KCNE3;COL13A1;COL14A1;ELN;COL12A1;ATP1A3;ATP1A2;PRCP;SLC1A5;SLC8A1;COL27A1;COL24A1;ATP1B2;COL1A1;SLC8A3;COL3A1;SLC7A7;COL1A2;COL4A2;COL5A1;COL4A1;MEP1A;XPNPEP2;KCNQ1;COL6A2;COL5A3;FXYD2;COL7A1;COL6A1;COL5A2;COL6A3;COL6A5
Glycosaminoglycan biosynthesis	25/53	1.15413e-08	6.99402e-07	0	0	3.28366	60.0166	B4GALT2;CHPF;XYLT1;HS6ST2;HS6ST3;CHST11;CHSY1;CHST12;DSE;NDST3;CHST15;CHST13;CHSY3;CHST14;ST3GAL2;CSGALNACT1;CHST7;CHPF2;HS3ST5;EXT1;UST;CHST1;CHST5;CHST2;CHST3
Cytokine-cytokine receptor interaction	76/292	1.0182e-07	5.14193e-06	0	0	1.81186	29.1711	ACVRL1;CNTFR;CD40;IL1F9;CXCL14;CXCL5;IL27RA;TNFSF13B;IL18RAP;TNFSF10;TNFSF11;CCR7;IL13RA2;IL13RA1;IL15RA;IL11;IL1R1;IL1R2;IL18;IL16;LIFR;TGFBR1;IL17RA;TNFRSF1A;TGFBR2;IL3RA;TNFRSF25;IL6ST;CCL11;IL4RA;TNFRSF11B;CXCR6;IL1RL1;IL1RL2;CCL8;THPO;CCL7;CCL2;TNFRSF14;IL12RB1;RELT;IL11RA1;TNFSF18;GDF10;NGFR;IL33;GDF11;TGFB1;IL34;TNFRSF9;GDF1;INHBA;GDF6;BMP7;BMP6;EPOR;GDF7;BMP5;BMP4;GDF9;CXCL10;BMP2;IL6;CD4…
Focal adhesion	56/199	3.17429e-07	1.37401e-05	0	0	1.95898	29.3122	MYLK2;ITGB5;LAMC3;FLT4;ITGB3;TNC;LAMC1;CCND2;TNN;KDR;TNR;ITGAV;ITGB7;PDGFRB;PDGFRA;MAP2K1;PRKCB;HGF;ITGA1;PGF;COL4A2;COL4A1;COL6A2;COL6A1;COL6A3;ITGA7;COL6A5;ITGA5;ITGA9;SHC4;SHC2;TNXB;LAMA2;SHC1;LAMA1;LAMA4;LAMA3;THBS2;THBS4;THBS3;VTN;RELN;SPP1;FYN;FLNC;LAMB2;CAV1;FN1;VEGFC;LAMB1;IGF1;PARVB;VEGFA;COL1A1;COL1A2;ITGA11
Relaxin signaling pathway	41/131	5.83083e-07	2.20843e-05	0	0	2.17875	31.2758	SHC4;MMP1B;SHC2;SHC1;ADCY4;ADCY3;ADCY2;ADCY1;ADCY7;GNAI1;RXFP3;ADCY5;GNG10;EDNRB;GNGT2;GNG2;CREB3L3;GNG4;CREB3L1;CREB3L2;GNG8;NOS1;MAP2K1;TGFB1;NOS2;NOS3;MMP2;VEGFC;GNG11;MMP9;TGFBR1;TGFBR2;VEGFA;COL1A1;ACTA2;COL3A1;COL1A2;MMP13;COL4A2;COL4A1;GNB4
Axon guidance	51/180	8.36581e-07	2.81649e-05	0	0	1.97239	27.6015	SEMA5A;ROBO2;SEMA5B;NRP1;ROBO1;RGS3;DPYSL2;PLXNC1;EPHB2;EPHB1;PDK1;SEMA6B;TRPC6;UNC5A;UNC5B;SEMA6D;TRPC1;WNT5A;UNC5C;UNC5D;EPHA3;SEMA7A;SEMA3D;SEMA3A;SEMA3B;CAMK2A;SEMA3G;PARD6G;SEMA3E;GNAI1;NTN3;ABLIM3;PLXNA2;SLIT1;SLIT3;FYN;SLIT2;LRRC4C;PLXNA4;WNT4;NTNG1;LIMK2;LIMK1;SEMA4F;SSH2;BMP7;GDF7;NFATC4;CXCL12;EFNA2;BMPR1B
Complement and coagulation cascades	30/88	2.62961e-06	7.9677e-05	0	0	2.37319	30.4924	CFH;PROS1;SERPINE1;CFI;F13A1;PLAT;TFPI;KNG2;C2;C4B;THBD;VTN;C1S2;C1S1;C7;PLAU;BDKRB2;BDKRB1;C1RB;C1RA;SERPINB2;FGG;F2R;F7;PROCR;SERPING1;MASP1;HC;F2RL2;F2RL3
Down genes (EL vs. PT)		p<0.05 + FC<0.5 : 1417 DEGs
BioPlanet 2019
Term	Overlap	P-value	Adj P-value	Old P-value	Old Adjusted P-value	Odds Ratio	Combined Score	Genes
Tight junction interactions	10/30	2.49513e-05	0.0376764	0	0	4.70478	49.864	CLDN10;PARD6B;PRKCI;CLDN4;CLDN3;CLDN23;CLDN7;CLDN1;INADL;CRB3
Tight junction	23/133	5.72594e-05	0.0432309	0	0	2.44082	23.8418	PRKCI;IGSF5;ACTN1;MAGI3;PRKCA;ACTN4;CGN;CLDN1;PRKCZ;INADL;CLDN10;CLDN4;OCLN;PARD6B;CLDN3;CLDN7;CLDN23;MYH14;MYL9;TJP3;LLGL2;CRB3;TJP2
Prolactin regulation of apoptosis	21/118	7.72204e-05	0.0388676	0	0	2.51187	23.7845	CLIC6;EGLN3;CISH;CITED4;NOG;ANK3;BHLHA15;TNFRSF11A;FBXO32;CLDN1;CHIT1;SOCS2;LDHB;SH3RF2;BCL2;NABP1;TNIK;TRIB1;LMCD1;SHANK2;IER3
KEGG 2019 Mouse
Term	Overlap	P-value	Adj P-value	Old P-value	Old Adjusted P-value	Odds Ratio	Combined Score	Genes
Tight junction	32/167	2.10223e-07	6.36975e-05	0	0	2.70454	41.5826	IGSF5;PRKAA2;NEDD4L;CLDN1;PRKCZ;ACTR3B;AMOT;SLC9A3R1;PARD6B;MARVELD2;CLDN23;MARVELD3;MYH14;SYNPO;CGNL1;PRKCI;MAP3K1;ACTN1;ACTN4;CGN;CLDN10;CLDN4;OCLN;CLDN3;CLDN7;AMOTL2;MYL9;TJP3;LLGL2;TUBA8;TJP2;CRB3

## Sheet: STable 3 (Fig1B)
GSEA analysis of hallmark pathways up and downregulated in EL over PT cells, as well as mammary gland luminal vs. myoepithelial and stem cell signatures. Partially showed on Figure 1B.
Upregulated in EL/PT
NAME	GS<br> follow link to MSigDB	GS DETAILS	SIZE	ES	NES	NOM p-val	FDR q-val	FWER p-val	RANK AT MAX	LEADING EDGE
HALLMARK_EPITHELIAL_MESENCHYMAL_TRANSITION	HALLMARK_EPITHELIAL_MESENCHYMAL_TRANSITION	Details …	162	0.482696	7.21923	0	0	0	3224	tags=75%, list=28%, signal=103%
HALLMARK_E2F_TARGETS	HALLMARK_E2F_TARGETS	Details ...	152	0.288353	4.02882	0	0	0	6028	tags=80%, list=52%, signal=164%
HALLMARK_MYC_TARGETS_V1	HALLMARK_MYC_TARGETS_V1	Details ...	131	0.29468	3.93907	0	0	0	6647	tags=86%, list=57%, signal=199%
HALLMARK_G2M_CHECKPOINT	HALLMARK_G2M_CHECKPOINT	Details ...	161	0.254086	3.69551	0	0	0	5974	tags=76%, list=51%, signal=155%
HALLMARK_MYC_TARGETS_V2	HALLMARK_MYC_TARGETS_V2	Details ...	47	0.426538	3.46352	0	0	0	6693	tags=100%, list=58%, signal=234%
HALLMARK_MTORC1_SIGNALING	HALLMARK_MTORC1_SIGNALING	Details ...	160	0.227151	3.36017	0	0	0	6193	tags=76%, list=53%, signal=159%
HALLMARK_UNFOLDED_PROTEIN_RESPONSE	HALLMARK_UNFOLDED_PROTEIN_RESPONSE	Details ...	93	0.276362	3.20941	0	0	0	7195	tags=89%, list=62%, signal=232%
HALLMARK_ANGIOGENESIS	HALLMARK_ANGIOGENESIS	Details ...	27	0.502088	3.03573	0	0	0	2790	tags=74%, list=24%, signal=97%
HALLMARK_GLYCOLYSIS	HALLMARK_GLYCOLYSIS	Details ...	153	0.203961	2.90038	0	0	0	4046	tags=55%, list=35%, signal=83%
HALLMARK_HYPOXIA	HALLMARK_HYPOXIA	Details ...	159	0.18717	2.72251	0	0.000114815	0.001	4804	tags=60%, list=41%, signal=100%
HALLMARK_IL2_STAT5_SIGNALING	HALLMARK_IL2_STAT5_SIGNALING	Details ...	143	0.191548	2.68008	0	0.000104377	0.001	3901	tags=52%, list=34%, signal=78%
HALLMARK_COAGULATION	HALLMARK_COAGULATION	Details ...	87	0.240649	2.65388	0	9.5679e-05	0.001	3774	tags=56%, list=32%, signal=83%
HALLMARK_INFLAMMATORY_RESPONSE	HALLMARK_INFLAMMATORY_RESPONSE	Details ...	141	0.191203	2.65026	0	8.83191e-05	0.001	2588	tags=41%, list=22%, signal=52%
HALLMARK_MYOGENESIS	HALLMARK_MYOGENESIS	Details ...	134	0.197635	2.64555	0	8.20106e-05	0.001	3197	tags=47%, list=27%, signal=64%
HALLMARK_KRAS_SIGNALING_UP	HALLMARK_KRAS_SIGNALING_UP	Details ...	145	0.174743	2.42719	0	0.0006522	0.008	1763	tags=32%, list=15%, signal=38%
HALLMARK_IL6_JAK_STAT3_SIGNALING	HALLMARK_IL6_JAK_STAT3_SIGNALING	Details ...	60	0.243102	2.22594	0.0019084	0.0028479	0.037	5137	tags=68%, list=44%, signal=122%
HALLMARK_PI3K_AKT_MTOR_SIGNALING	HALLMARK_PI3K_AKT_MTOR_SIGNALING	Details ...	81	0.201383	2.15783	0.00198413	0.00363467	0.05	6005	tags=72%, list=52%, signal=147%
HALLMARK_ALLOGRAFT_REJECTION	HALLMARK_ALLOGRAFT_REJECTION	Details ...	109	0.180983	2.15435	0.00209205	0.00351476	0.051	4639	tags=58%, list=40%, signal=95%
HALLMARK_APICAL_JUNCTION	HALLMARK_APICAL_JUNCTION	Details ...	152	0.12471	1.74167	0.0164948	0.0340529	0.403	2548	tags=34%, list=22%, signal=43%
HALLMARK_UV_RESPONSE_DN	HALLMARK_UV_RESPONSE_DN	Details ...	119	0.127261	1.61029	0.0433925	0.0634468	0.631	3423	tags=42%, list=29%, signal=59%
Downregulated in EL/PT
NAME	GS<br> follow link to MSigDB	GS DETAILS	SIZE	ES	NES	NOM p-val	FDR q-val	FWER p-val	RANK AT MAX	LEADING EDGE
HALLMARK_OXIDATIVE_PHOSPHORYLATION	HALLMARK_OXIDATIVE_PHOSPHORYLATION	Details ...	123	-0.241725	-3.03104	0	0	0	6017	tags=76%, list=52%, signal=155%
HALLMARK_DNA_REPAIR	HALLMARK_DNA_REPAIR	Details ...	110	-0.225191	-2.77062	0	0.000365385	0.001	7985	tags=91%, list=69%, signal=287%
HALLMARK_KRAS_SIGNALING_DN	HALLMARK_KRAS_SIGNALING_DN	Details ...	91	-0.243174	-2.70275	0	0.00024359	0.001	1925	tags=41%, list=17%, signal=48%
HALLMARK_MITOTIC_SPINDLE	HALLMARK_MITOTIC_SPINDLE	Details ...	169	-0.151214	-2.28185	0	0.00337727	0.017	9767	tags=99%, list=84%, signal=606%
HALLMARK_ESTROGEN_RESPONSE_EARLY	HALLMARK_ESTROGEN_RESPONSE_EARLY	Details ...	161	-0.152404	-2.21819	0.00194175	0.00498115	0.032	1577	tags=29%, list=14%, signal=33%
HALLMARK_ESTROGEN_RESPONSE_LATE	HALLMARK_ESTROGEN_RESPONSE_LATE	Details ...	152	-0.139117	-2.03635	0	0.0139425	0.107	1772	tags=29%, list=15%, signal=34%
HALLMARK_PEROXISOME	HALLMARK_PEROXISOME	Details ...	77	-0.174169	-1.7936	0.0135397	0.0461518	0.346	8114	tags=87%, list=70%, signal=285%
HALLMARK_PROTEIN_SECRETION	HALLMARK_PROTEIN_SECRETION	Details ...	84	-0.164451	-1.77613	0.017341	0.0445058	0.371	8492	tags=89%, list=73%, signal=328%
Upregulated in EL/PT
NAME	GS<br> follow link to MSigDB	GS DETAILS	SIZE	ES	NES	NOM p-val	FDR q-val	FWER p-val	RANK AT MAX	LEADING EDGE
LIM_MAMMARY_STEM_CELL_UP	LIM_MAMMARY_STEM_CELL_UP	Details ...	388	0.400421	9.10712	0	0	0	2873	tags=63%, list=25%, signal=81%
LIM_MAMMARY_LUMINAL_MATURE_DN	LIM_MAMMARY_LUMINAL_MATURE_DN	Details ...	84	0.258606	2.7748	0	0	0	4077	tags=61%, list=35%, signal=93%
Downregulated in EL/PT
NAME	GS<br> follow link to MSigDB	GS DETAILS	SIZE	ES	NES	NOM p-val	FDR q-val	FWER p-val	RANK AT MAX	LEADING EDGE
LIM_MAMMARY_STEM_CELL_DN	LIM_MAMMARY_STEM_CELL_DN	Details ...	328	-0.391861	-8.11507	0	0	0	4404	tags=76%, list=38%, signal=119%
LIM_MAMMARY_LUMINAL_MATURE_UP	LIM_MAMMARY_LUMINAL_MATURE_UP	Details ...	73	-0.295619	-2.92244	0	0	0	3278	tags=58%, list=28%, signal=80%
LIM_MAMMARY_LUMINAL_PROGENITOR_UP	LIM_MAMMARY_LUMINAL_PROGENITOR_UP	Details ...	50	-0.303024	-2.49305	0	0.000780437	0.002	912	tags=38%, list=8%, signal=41%

## Sheet: STable 4
Gene lists used to generate each Figure panel.
Panel	Gene lists
Figure 1E - EMT genes	Epcam, Esrp1, Esrp2, Krt18, Krt8, Foxa1, Inadl, Llgl1, Prkcz, Cdh1, Dab2ip, Efna1, Foxa2, Tsc2, Vegfa, Prkci, Crb3, Llgl2, Mpp5, Dsp, Pkp2, Cdh2, Cdh11, Krt5, Snai2, Prrx1, Fn1, Bmp7, Col1a1, Dab2, Jag1, Mdk, Wnt2, Wnt16, Mmp2, Mmp3, Mmp9, Snai1, Zeb2, Axin2, Bambi, Dlg5, Lef1, Loxl2, Loxl3, Wnt5a, Wnt11, Vim, Zeb1, Eng, Acvrl1, Adam15, Msx1, Krt79, Akna
Figure 2A - Ep/EMT inhibitors	Adipor1, Dab2ip, Dact3, Efna1, Foxa1, Foxa2, Fuz, Hpn, Ldlrad4, Mad2l2, Ovol2, Pawr, Pbld1, Ppp2ca, Pten, Sdhaf2, Sfrp1, Sfrp2, Strap, Trim62, Tsc2, Usf3, Vasn, Vegfa, CDH1, EPCAM, ZO1, ZO2, KRT8, KRT18, Col4a1, Lama1, MUC1, ESRP1, ESRP2, EZH2, OVOL1, OVOL2, prkci, PARD6A, pard6b, pard3, inadl, LLGL1, SCRIB, DLG1, CRB3, LLGL2, PRKCZ, MPDZ, EZH2, mpp5, dsp, pkp1, pkp2, pkp3
Figure 2A - M/EMT inducers	Acvr1, Acvrl1, Adam15, Akna, Ager, Alx1, Axin2, Bambi, Bcl9l, BMP2, BMP4, BMP7, Col1a1, Crb2, Ctnnb1, Cul7, Dab2, Ddx5, Ddx17, Dlg5, Eng, Eomes, Epb41l5, Ezh2, Fam83d, Fgf8, Fgfr2, Flna, Foxc1, Gcnt2, Gja1, Glipr2, Gsk3b, Has2, Hdac2, Hey1, Hey2, Heyl, Hif1a, Hnrnpab, Il1b, Il6, Isl1, Jag1, Lef1, Loxl2, Loxl3, Mdk, Msx1, Msx2, Mtor, Myocd, Nfatc1, Nkx2-1, Nog, Notch1, Pdcd4, Pdpn, Ppp3r1, Rbpj, R…
Figure 2B - DEGs batch2	Marcks, Prnp, Ptn, Sfrp1, Chl1, Cdh19, Gas7, Aspa, Apod, Gfra3, Kcna1, Gpr37l1, Adam23, Sostdc1, Lgi4, Plp1, Ncam1, Matn2, Abca8a, Scn7a, Kcna2, C4b, Apoe, Itih5, Fxyd1, Igfbp7, Gsn, Vim, Egr1, Cryab, Col4a2, Col4a1, Prex2, Postn, Fst, Nkain4, Adgrg6, S1pr3, Pdzd2, Gap43, Lipg, Hsd11b1, Pde5a, Clec3b, Cox4i2, Higd1b, F2r, Ifitm1, Gucy1b3, Gucy1a3, Arhgap42, Mapt, Ndufa4l2, Lhfp, Epb41l2, Pdgfrb, …
Figure 2B – Module A	Marcks, Prnp, Ptn, Sfrp1, Chl1, Cdh19, Gas7, Aspa, Apod, Gfra3, Kcna1, Gpr37l1, Adam23, Sostdc1, Lgi4, Plp1, Ncam1, Matn2, Abca8a, Scn7a, Kcna2, C4b, Apoe, Itih5, Fxyd1, Igfbp7, Gsn, Vim, Egr1, Cryab, Col4a2, Col4a1, Prex2, Postn, Fst, Nkain4, Adgrg6, S1pr3
Figure 2B – Module B	Cryab, Col4a2, Col4a1, Prex2, Postn, Fst, Nkain4, Adgrg6, S1pr3, Pdzd2, Gap43, Lipg, Hsd11b1, Pde5a, Clec3b, Cox4i2, Higd1b, F2r, Ifitm1, Gucy1b3, Gucy1a3, Arhgap42, Mapt, Ndufa4l2, Lhfp, Epb41l2, Pdgfrb, Kcnk3, Tbx5, Crim1, Mfge8, Lims1, Fermt2, Sdc2, Itga1, Bgn, Gdpd3, Gng11, Ebf1, Cst3, Ppp1r14a, Cd81, Zbtb20
Figure 2B – Module C	Gap43, Lipg, Hsd11b1, Pde5a, Clec3b, Cox4i2, Higd1b, F2r, Ifitm1, Gucy1b3, Gucy1a3, Arhgap42, Mapt, Ndufa4l2, Lhfp, Epb41l2, Pdgfrb, Kcnk3, Tbx5, Crim1, Mfge8, Lims1, Fermt2, Sdc2, Itga1, Bgn, Gdpd3, Gng11, Ebf1, Cst3, Ppp1r14a, Cd81, Zbtb20, Adam33, Id3, Cyr61, Rgs5, Sept4, Ltbp2, Notch3, Gpx3, Cald1, Rarres2, Ifitm3, Zeb2, Col3a1, Ctgf, Fhl1, Eln, Mgp, Mustn1, Lmod1, Myl9, Flna, Fam129a
Figure 2B – Module D	Notch3, Gpx3, Cald1, Rarres2, Ifitm3, Zeb2, Col3a1, Ctgf, Fhl1, Eln, Mgp, Mustn1, Lmod1, Myl9, Flna, Fam129a, Actc1, Cnn1, Thbs1, Actg2, Acta2, Tagln, Myh11, Map1b, Ckb, Crip1, Des, Mylk, Filip1l, Sparcl1
Figure 2B – Module E	Cyp2f2, Scgb3a2, Scgb1a1, Hp, Nupr1
Figure 2B – Module F	Tuba1a, Cdkn1c, Sec14l3, Aldh3b1, Mns1, Gm867, Calml4, Cyp2s1, AU040972, Meig1, Tmem212, Ccdc153, Dnah12, Fam183b, Dynlrb2, Cfap126, Pifo, Rsph1, Tppp3, Aldh1a1, Cbr2, Krt8
Figure 2B – Module G	Krt8, Timp3, S100a6, Pmp22, Cav1, Ager, Clic5, Krt7, Pdpn, Poc1a, Spock2, Igfbp2, Rtkn2, Akap5, Hopx, Sdpr, Emp2, Ier3, Prdx6, Cyp4b1, Neat1, Anxa5, Lgals3, Nfkbia
Figure 2B – Module H	Gsn, Vim, Egr1, Cryab, Col4a2, Col4a1, Prex2, Postn, Fst, Nkain4, Adgrg6, S1pr3, Pdzd2, Gap43, Lipg, Hsd11b1, Pde5a, Clec3b, Cox4i2, Higd1b, F2r, Ifitm1, Gucy1b3, Gucy1a3, Arhgap42, Mapt, Ndufa4l2, Lhfp, Epb41l2, Pdgfrb, Kcnk3, Tbx5, Crim1, Mfge8, Lims1, Fermt2, Sdc2, Itga1, Bgn, Gdpd3, Gng11, Ebf1, Cst3, Ppp1r14a, Cd81, Zbtb20, Adam33, Id3, Cyr61, Rgs5, Sept4, Ltbp2, Notch3, Gpx3, Cald1, Rarres2…
Figure 2B – Module I	Fabp5, Scd1, Elovl1, S100g, Slc34a2, Lgi3, Npc2, Cd74, H2-Aa, H2-Ab1, Sftpd, Chia1, Ctsc, Ctsh, Lyz1, Cpm, Lyz2, Cxcl15, Sftpb, Zdhhc3, Atp1b1, Sftpa1, Napsa, Cd36
Figure 2B – Module J	Igfbp5, Eno1, Shf, Kcnn4, Car6, Col9a1, Csn1s1, Csn3, Wfdc18, Csn1s2a, Lalba, Scgb2b27, Folr1, Arg1, Aldoc, Fxyd3, Lcn2, Epcam, Aqp5, Duoxa1, Tesc, Cldn10, Plet1, Trf, Nf1, Id2, Krt18

## Sheet: STable 5 (Fig2B)
Enrichr analysis of Gene modules from Figure 2B.
		CELL TYPES																				ONTOLOGIES
Gene module	Nr genes	Mouse Gene Atlas										Proteomics DB 2020 (human)										GO Biological Process 2018										GO Molecular Function 2018										GO Cellular Component 2018
A	38	Term	Overlap	P-value	Adjusted P-value	Old P-value	Old Adjusted P-value	Odds Ratio	Combined Score	Genes		Term	Overlap	P-value	Adjusted P-value	Old P-value	Old Adjusted P-value	Odds Ratio	Combined Score	Genes		Term	Overlap	P-value	Adjusted P-value	Old P-value	Old Adjusted P-value	Odds Ratio	Combined Score	Genes		Term	Overlap	P-value	Adjusted P-value	Old P-value	Old Adjusted P-value	Odds Ratio	Combined Score	Genes		Term	Overlap	P-value	Adjusted P-value	Old P-value	Old Adjusted P-value	Odds Ratio	Combined Score
		dorsal root ganglia	8/541	6.51e-06	0.000625	0	0	7.78286	92.9469	ABCA8A;CHL1;LGI4;KCNA1;KCNA2;ADAM23;SCN7A;APOD		Brain SNB-75 BTO:0004222 P001561	9/331	8.93e-09	8.15e-06	0	0	14.3107	265.233	POSTN;MARCKS;GSN;COL4A2;COL4A1;NCAM1;IGFBP7;CRYAB;GAS7		neuronal action potential (GO:0019228)	3/23	1.09e-05	0.0557026	0	0	68.6499	784.346	KCNA1;KCNA2;SCN7A		amyloid-beta binding (GO:0001540)	3/49	0.00011	0.126326	0	0	32.2234	293.79	PRNP;APOE;CRYAB		dendrite (GO:0030425)	5/215	5.15e-05	0.0229791	0	0	12.2399	120.851
		osteoblast day21	6/264	9.68e-06	0.000465	0	0	11.9617	138.105	POSTN;MARCKS;SFRP1;ADAM23;S1PR3;MATN2		Brain SNB-75 BTO:0004222 SNB75 NCI60	7/257	4.79e-07	0.000219	0	0	14.3354	208.608	MARCKS;COL4A2;COL4A1;IGFBP7;VIM;CRYAB;GAS7		response to heparin (GO:0071503)	2/6	5.25e-05	0.133884	0	0	175.439	1728.99	EGR1;SFRP1		delayed rectifier potassium channel activity (GO:0005251)	2/29	0.00138167	0.79515	0	0	36.2976	239.001	KCNA1;KCNA2		juxtaparanode region of axon (GO:0044224)	2/9	0.000125	0.0279826	0	0	116.959	1050.68
		osteoblast day14	6/301	2.03e-05	0.000651	0	0	10.4913	113.333	POSTN;MARCKS;SFRP1;NCAM1;S1PR3;MATN2		Lung non-small lung cancer BTO:0002553 P005587-I	6/248	6.77e-06	0.00206158	0	0	12.7334	151.559	POSTN;COL4A2;COL4A1;APOD;IGFBP7;APOE		regulation of dendritic spine maintenance (GO:1902950)	2/7	7.34e-05	0.124809	0	0	150.376	1431.57	PRNP;APOE		G-protein coupled receptor activity (GO:0004930)	4/267	0.00160423	0.615489	0	0	7.88488	50.7401	SFRP1;ADGRG6;S1PR3;GPR37L1		endoplasmic reticulum lumen (GO:0005788)	4/270	0.00167117	0.248447	0	0	7.79727	49.8575
		spinal cord	6/353	4.96e-05	0.00119144	0	0	8.94588	88.6594	KCNA1;ADAM23;PLP1;APOD;NCAM1;GPR37L1		Mixed PDB:200045 mix-pool AC fluid and CSF	6/286	1.52e-05	0.00347979	0	0	11.0416	122.465	PRNP;GSN;NCAM1;IGFBP7;APOE;CRYAB		negative regulation of protein metabolic process (GO:0051248)	3/43	7.41e-05	0.0945284	0	0	36.7197	349.21	PRNP;APOE;CRYAB		potassium ion transmembrane transporter activity (GO:0015079)	2/38	0.00236678	0.68104	0	0	27.7008	167.486	KCNA1;KCNA2		main axon (GO:0044304)	2/33	0.00178827	0.199392	0	0	31.8979	201.802
		lens	6/947	0.00836196	0.16055	0	0	3.33463	15.9531	SFRP1;CHL1;COL4A1;NCAM1;IGFBP7;CRYAB		Breast Hs-578T BTO:0003885 HS578T NCI60	5/219	5.62e-05	0.0102686	0	0	12.0163	117.592	POSTN;MARCKS;COL4A1;IGFBP7;VIM		regulation of amyloid fibril formation (GO:1905906)	2/8	9.77e-05	0.0997274	0	0	131.579	1214.93	APOE;CRYAB		cation channel activity (GO:0005261)	3/146	0.00266622	0.613765	0	0	10.8147	64.0998	KCNA1;KCNA2;SCN7A		paranode region of axon (GO:0033270)	1/6	0.0113473	1	0	0	87.7193	392.875
		cerebellum	4/428	0.00859339	0.137494	0	0	4.91884	23.3977	LGI4;KCNA1;KCNA2;GPR37L1		Mixed PDB:200045 4Skin mix1 4Skin iPS	6/365	5.98e-05	0.00909317	0	0	8.65177	84.1402	COL4A2;COL4A1;IGFBP7;APOE;VIM;CRYAB		negative regulation of amyloid-beta formation (GO:1902430)	2/9	0.000125	0.106723	0	0	116.959	1050.68	PRNP;APOE		cholesterol binding (GO:0015485)	2/43	0.00302199	0.579719	0	0	24.4798	142.028	APOD;APOE		cytoplasmic vesicle lumen (GO:0060205)	2/129	0.0249437	1	0	0	8.15993	30.1194
		hypothalamus	3/296	0.0184791	0.253427	0	0	5.33428	21.2897	NKAIN4;CHL1;NCAM1		Mixed PDB:200045 4Skin mix1 4Skin Fibro	6/371	6.54e-05	0.00853006	0	0	8.51185	82.0115	COL4A2;COL4A1;IGFBP7;APOE;VIM;CRYAB		action potential (GO:0001508)	3/54	0.000147	0.107013	0	0	29.2398	258.084	KCNA1;KCNA2;SCN7A		sterol binding (GO:0032934)	2/48	0.0037525	0.617018	0	0	21.9298	122.485	APOD;APOE		very-low-density lipoprotein particle (GO:0034361)	1/15	0.0281336	1	0	0	35.0877	125.291
		lung	3/354	0.0293785	0.352542	0	0	4.4603	15.7337	PREX2;GSN;SCN7A		Melanoma A-375 BTO:0002806 2hrs 25cm	4/136	0.000126	0.0144011	0	0	15.4799	138.974	GSN;COL4A2;COL4A1;VIM		negative regulation of amyloid precursor protein catabolic process (GO:1902992)	2/11	0.000191	0.121994	0	0	95.6938	819.323	PRNP;APOE		metal ion binding (GO:0046872)	4/442	0.00959556	1	0	0	4.76304	22.1312	POSTN;GSN;APOE;CDH19		axon (GO:0030424)	2/141	0.0294	1	0	0	7.46547	26.3289
		C3H 10T1 2	2/155	0.0349685	0.372997	0	0	6.79117	22.7729	MARCKS;PTN		Melanoma A-375 BTO:0002806 3hrs 25cm	4/153	0.000199	0.020137	0	0	13.7599	117.299	GSN;COL4A2;COL4A1;VIM		regulation of neuron death (GO:1901214)	3/72	0.000345	0.195467	0	0	21.9298	174.84	PRNP;EGR1;APOE		phosphatidylcholine-sterol O-acyltransferase activator activity (GO:0060228)	1/6	0.0113473	1	0	0	87.7193	392.875	APOE		focal adhesion (GO:0005925)	3/356	0.0298038	1	0	0	4.43525	15.5815
		3T3-L1	2/181	0.0462892	0.444377	0	0	5.81564	17.8706	ADAM23;PTN		Renal UO-31 BTO:0004234 P003201	5/303	0.000257	0.0234864	0	0	8.68508	71.7864	COL4A2;COL4A1;NCAM1;IGFBP7;MATN2		regulation of protein homooligomerization (GO:0032462)	2/15	0.000363	0.185427	0	0	70.1754	555.796	APOE;CRYAB		cuprous ion binding (GO:1903136)	1/6	0.0113473	1	0	0	87.7193	392.875	PRNP		anchored component of external side of plasma membrane (GO:0031362)	1/18	0.0336671	1	0	0	29.2398	99.1589
B	43	Term	Overlap	P-value	Adjusted P-value	Old P-value	Old Adjusted P-value	Odds Ratio	Combined Score	Genes		Term	Overlap	P-value	Adjusted P-value	Old P-value	Old Adjusted P-value	Odds Ratio	Combined Score	Genes		Term	Overlap	P-value	Adjusted P-value	Old P-value	Old Adjusted P-value	Odds Ratio	Combined Score	Genes		Term	Overlap	P-value	Adjusted P-value	Old P-value	Old Adjusted P-value	Odds Ratio	Combined Score	Genes		Term	Overlap	P-value	Adjusted P-value	Old P-value	Old Adjusted P-value	Odds Ratio	Combined Score
		lung	7/354	9.55e-06	0.000917	0	0	9.19721	106.308	PREX2;GUCY1A3;PDZD2;ITGA1;TBX5;HIGD1B;GNG11		Renal RXF-393 BTO:0004207 P003812	7/354	9.55e-06	0.00872151	0	0	9.19721	106.308	PDGFRB;COL4A2;CD81;COL4A1;ITGA1;CRYAB;FERMT2		cGMP metabolic process (GO:0046068)	3/28	2.92e-05	0.149051	0	0	49.8339	520.318	GUCY1A3;GUCY1B3;PDE5A		platelet-derived growth factor binding (GO:0048407)	2/11	0.000245	0.282332	0	0	84.5666	703.007	PDGFRB;COL4A1		focal adhesion (GO:0005925)	6/356	0.000107	0.047552	0	0	7.83904	71.6978
		bladder	4/195	0.000803	0.0385541	0	0	9.54085	67.9966	PPP1R14A;CLEC3B;ITGA1;PDE5A		Lung non-small lung cancer BTO:0002553 P005587-I	6/248	1.42e-05	0.00648412	0	0	11.2528	125.604	CLEC3B;POSTN;COL4A2;CD81;COL4A1;ITGA1		cell migration involved in heart development (GO:0060973)	2/8	0.000125	0.319929	0	0	116.279	1044.66	PDGFRB;TBX5		G-protein coupled receptor activity (GO:0004930)	4/267	0.00254597	1	0	0	6.96803	41.6218	PDGFRB;ADGRG6;F2R;S1PR3		endoplasmic reticulum lumen (GO:0005788)	5/270	0.000273	0.060973	0	0	8.61326	70.6675
		umbilical cord	4/208	0.00102099	0.0326716	0	0	8.94454	61.6009	POSTN;ITGA1;NDUFA4L2;FERMT2		Brain SNB-75 BTO:0004222 P001561	6/331	7.14e-05	0.0217438	0	0	8.43111	80.488	POSTN;COL4A2;COL4A1;EPB41L2;CRYAB;FERMT2		extracellular matrix organization (GO:0030198)	5/229	0.000127	0.216354	0	0	10.1554	91.0918	POSTN;COL4A2;COL4A1;ITGA1;BGN		amyloid-beta binding (GO:0001540)	2/49	0.00498023	1	0	0	18.9843	100.66	CST3;CRYAB		mitochondrial respiratory chain complex IV (GO:0005751)	2/17	0.000602	0.0894373	0	0	54.7196	405.796
		osteoblast day21	4/264	0.00244417	0.0586602	0	0	7.04722	42.3823	POSTN;NDUFA4L2;BGN;S1PR3		Mixed PDB:200045 4Skin mix1 4Skin iPS	6/365	0.000122	0.0278956	0	0	7.64575	68.8861	PDGFRB;COL4A2;COL4A1;MFGE8;CRYAB;FERMT2		protein kinase C-activating G-protein coupled receptor signaling pathway (GO:0007205)	2/12	0.000294	0.375006	0	0	77.5194	630.395	GAP43;F2R		collagen binding (GO:0005518)	2/52	0.00559262	1	0	0	17.8891	92.7783	ADGRG6;ITGA1		axolemma (GO:0030673)	1/6	0.0128323	1	0	0	77.5194	337.658
		heart	5/568	0.00717409	0.137742	0	0	4.09433	20.2149	ZBTB20;TBX5;HIGD1B;CRYAB;KCNK3		Mixed PDB:200045 4Skin mix1 4Skin Fibro	6/371	0.000134	0.0243925	0	0	7.5221	67.103	PDGFRB;COL4A2;COL4A1;MFGE8;CRYAB;FERMT2		positive regulation of phosphoprotein phosphatase activity (GO:0032516)	2/15	0.000466	0.475331	0	0	62.0155	475.776	PDGFRB;ITGA1		transmembrane receptor protein tyrosine kinase activity (GO:0004714)	2/61	0.00762459	1	0	0	15.2497	74.3634	PDGFRB;CRIM1		lysosomal lumen (GO:0043202)	2/86	0.0147213	1	0	0	10.8167	45.6296
		nucleus accumbens	4/383	0.00907083	0.145133	0	0	4.85761	22.8438	GUCY1A3;GUCY1B3;GAP43;PDZD2		Lung non-small lung cancer BTO:0002553 P005586-I	5/281	0.000329	0.0499967	0	0	8.27609	66.3806	CLEC3B;POSTN;CD81;COL4A1;ITGA1		cyclic nucleotide biosynthetic process (GO:0009190)	2/19	0.000754	0.641581	0	0	48.9596	352.002	GUCY1A3;GUCY1B3		PDZ domain binding (GO:0030165)	2/62	0.00786806	1	0	0	15.0038	72.6923	SDC2;CRIM1		Golgi lumen (GO:0005796)	2/98	0.018836	1	0	0	9.49217	37.7028
		osteoblast day14	3/301	0.0267461	0.366803	0	0	4.63571	16.7876	POSTN;SDC2;S1PR3		Lung non-small lung cancer BTO:0002553 P005584-I	5/289	0.000374	0.0487402	0	0	8.04699	63.5075	CLEC3B;POSTN;CD81;COL4A1;ITGA1		regulation of cell proliferation (GO:0042127)	7/740	0.00093	0.678153	0	0	4.39975	30.7105	PDGFRB;IFITM1;CD81;F2R;ITGA1;S1PR3;TBX5		phosphatidylinositol phosphate binding (GO:1901981)	2/81	0.0131384	1	0	0	11.4844	49.7527	MAPT;FERMT2		cell cortex region (GO:0099738)	1/11	0.023403	1	0	0	42.2833	158.769
												Breast Hs-578T BTO:0003885 P001355	5/324	0.000629	0.0717334	0	0	7.17772	52.9148	POSTN;COL4A1;SDC2;CRIM1;FERMT2		negative regulation of kinase activity (GO:0033673)	3/91	0.000986	0.628782	0	0	15.3335	106.14	PREX2;BGN;MAPT		protein binding involved in cell-matrix adhesion (GO:0098634)	1/7	0.0149554	1	0	0	66.4452	279.248	ITGA1		filopodium membrane (GO:0031527)	1/12	0.0255039	1	0	0	38.7597	142.206
												Lung non-small lung cancer BTO:0002553 P005585-I	4/207	0.00100291	0.101739	0	0	8.98775	62.0591	CLEC3B;POSTN;CD81;ITGA1		positive regulation of phosphatase activity (GO:0010922)	2/22	0.00101488	0.575439	0	0	42.2833	291.458	PDGFRB;ITGA1		AT DNA binding (GO:0003680)	1/7	0.0149554	1	0	0	66.4452	279.248	MAPT		platelet dense granule lumen (GO:0031089)	1/14	0.0296923	1	0	0	33.2226	116.839
												Embryonic stem HES-3 PDB:200034 4Skin mix1 hESC	5/360	0.00100868	0.0920924	0	0	6.45995	44.5679	PDGFRB;COL4A1;MFGE8;CRYAB;FERMT2		cGMP biosynthetic process (GO:0006182)	2/24	0.00120929	0.617099	0	0	38.7597	260.377	GUCY1A3;GUCY1B3		protein phosphatase binding (GO:0019903)	2/92	0.0167239	1	0	0	10.1112	41.3642	ITGA1;MAPT		platelet dense granule (GO:0042827)	1/21	0.0442138	1	0	0	22.1484	69.0746
C	55	Term	Overlap	P-value	Adjusted P-value	Old P-value	Old Adjusted P-value	Odds Ratio	Combined Score	Genes		Term	Overlap	P-value	Adjusted P-value	Old P-value	Old Adjusted P-value	Odds Ratio	Combined Score	Genes		Term	Overlap	P-value	Adjusted P-value	Old P-value	Old Adjusted P-value	Odds Ratio	Combined Score	Genes		Term	Overlap	P-value	Adjusted P-value	Old P-value	Old Adjusted P-value	Odds Ratio	Combined Score	Genes		Term	Overlap	P-value	Adjusted P-value	Old P-value	Old Adjusted P-value	Odds Ratio	Combined Score
		bladder	12/195	1.6e-13	1.53e-11	0	0	22.3776	659.38	PPP1R14A;CLEC3B;CALD1;MUSTN1;FHL1;ITGA1;LMOD1;FAM129A;ADAM33;FLNA;PDE5A;MYL9		Hematopoietic PBMC BTO:0001008 81719202114 replicate03-2	8/488	5.28e-05	0.0481694	0	0	5.96125	58.7169	CST3;PPP1R14A;CALD1;RARRES2;FHL1;MYL9;GNG11;LIMS1		cellular response to transforming growth factor beta stimulus (GO:0071560)	5/100	8.06e-06	0.0411338	0	0	18.1818	213.246	CLEC3B;COL3A1;LTBP2;FERMT2;LIMS1		platelet-derived growth factor binding (GO:0048407)	2/11	0.000402	0.462633	0	0	66.1157	516.972	PDGFRB;COL3A1		focal adhesion (GO:0005925)	8/356	5.47e-06	0.00243918	0	0	8.1716	99.0105
		lung	7/354	5.01e-05	0.00240711	0	0	7.19055	71.1903	GUCY1A3;NOTCH3;ITGA1;MGP;TBX5;HIGD1B;GNG11		Hematopoietic PBMC BTO:0001008 81719202114 replicate03-1	8/491	5.51e-05	0.0251444	0	0	5.92483	58.1031	CST3;PPP1R14A;CALD1;RARRES2;FHL1;MYL9;GNG11;LIMS1		cGMP metabolic process (GO:0046068)	3/28	6.14e-05	0.156659	0	0	38.961	377.849	GUCY1A3;GUCY1B3;PDE5A		tropomyosin binding (GO:0005523)	2/14	0.000662	0.380703	0	0	51.9481	380.31	CALD1;LMOD1		cytoskeleton (GO:0005856)	7/520	0.000531	0.118523	0	0	4.8951	36.9082
		umbilical cord	5/208	0.000264	0.00845981	0	0	8.74126	72.0119	COL3A1;ELN;ITGA1;NDUFA4L2;FERMT2		Hematopoietic PBMC BTO:0001008 81719202114 replicate03-3	8/491	5.51e-05	0.016763	0	0	5.92483	58.1031	CST3;PPP1R14A;CALD1;RARRES2;FHL1;MYL9;GNG11;LIMS1		cell migration involved in heart development (GO:0060973)	2/8	0.000206	0.349913	0	0	90.9091	771.731	PDGFRB;TBX5		integrin binding (GO:0005178)	3/94	0.00221012	0.84795	0	0	11.6054	70.9637	COL3A1;CYR61;CTGF		platelet dense granule lumen (GO:0031089)	2/14	0.000662	0.0983456	0	0	51.9481	380.31
		osteoblast day21	5/264	0.000783	0.0187987	0	0	6.88705	49.2564	MGP;BGN;NDUFA4L2;ID3;LTBP2		Hematopoietic PBMC BTO:0001008 81719202114 replicate03-4	8/491	5.51e-05	0.0125722	0	0	5.92483	58.1031	CST3;PPP1R14A;CALD1;RARRES2;FHL1;MYL9;GNG11;LIMS1		regulation of cell migration (GO:0030334)	6/316	0.000224	0.28611	0	0	6.90449	58.0161	PDGFRB;IFITM1;F2R;FLNA;TBX5;CYR61		transmembrane receptor protein tyrosine kinase activity (GO:0004714)	2/61	0.0122489	1	0	0	11.9225	52.4867	PDGFRB;CRIM1		endoplasmic reticulum lumen (GO:0005788)	5/270	0.000866	0.0965951	0	0	6.73401	47.4832
		osteoblast day5	4/175	0.00136428	0.0261941	0	0	8.31169	54.8333	SDC2;ID3;CYR61;CTGF		Hematopoietic PBMC BTO:0001008 81719202114 replicate03-5	8/491	5.51e-05	0.0100578	0	0	5.92483	58.1031	CST3;PPP1R14A;CALD1;RARRES2;FHL1;MYL9;GNG11;LIMS1		positive regulation of stem cell differentiation (GO:2000738)	2/12	0.000481	0.491396	0	0	60.6061	462.949	LTBP2;TBX5		PDZ domain binding (GO:0030165)	2/62	0.0126351	1	0	0	11.7302	51.276	SDC2;CRIM1		mitochondrial respiratory chain complex IV (GO:0005751)	2/17	0.000983	0.0877216	0	0	42.7807	296.234
		MEF	5/300	0.00138383	0.0221413	0	0	6.06061	39.8964	CALD1;CRIM1;LTBP2;CYR61;CTGF		Hematopoietic PBMC BTO:0001008 81719202114 replicate03-6	8/492	5.59e-05	0.00850208	0	0	5.91279	57.9005	CST3;PPP1R14A;CALD1;RARRES2;FHL1;MYL9;GNG11;LIMS1		protein kinase C-activating G-protein coupled receptor signaling pathway (GO:0007205)	2/12	0.000481	0.409497	0	0	60.6061	462.949	GAP43;F2R		protein binding involved in cell-matrix adhesion (GO:0098634)	1/7	0.0190946	1	0	0	51.9481	205.629	ITGA1		platelet dense granule (GO:0042827)	2/21	0.00150786	0.112084	0	0	34.632	225.007
		osteoblast day14	5/301	0.00140429	0.0192589	0	0	6.04047	39.6752	ELN;SDC2;MGP;ID3;LTBP2		Hematopoietic PBMC BTO:0001008 81719202114 replicate02-1	8/502	6.43e-05	0.00839131	0	0	5.795	55.9298	CST3;PPP1R14A;CALD1;RARRES2;FHL1;MYL9;GNG11;LIMS1		muscle contraction (GO:0006936)	4/137	0.000548	0.399603	0	0	10.6171	79.7235	CALD1;ITGA1;LMOD1;MYL9		AT DNA binding (GO:0003680)	1/7	0.0190946	1	0	0	51.9481	205.629	MAPT		cell cortex part (GO:0044448)	2/44	0.00652334	0.41563	0	0	16.5289	83.1797
		heart	5/568	0.0196759	0.236111	0	0	3.20102	12.5748	RGS5;ZBTB20;TBX5;HIGD1B;KCNK3		Hematopoietic PBMC BTO:0001008 81719202114 replicate02-2	8/502	6.43e-05	0.0073424	0	0	5.795	55.9298	CST3;PPP1R14A;CALD1;RARRES2;FHL1;MYL9;GNG11;LIMS1		cell junction assembly (GO:0034329)	3/59	0.000574	0.365911	0	0	18.49	138	FLNA;FERMT2;LIMS1		phosphatidylinositol phosphate binding (GO:1901981)	2/81	0.0209425	1	0	0	8.97868	34.7113	MAPT;FERMT2		actin cytoskeleton (GO:0015629)	4/294	0.00866742	0.483209	0	0	4.94743	23.4913
												Hematopoietic PBMC BTO:0001008 81719202114 replicate02-4	8/502	6.43e-05	0.00652657	0	0	5.795	55.9298	CST3;PPP1R14A;CALD1;RARRES2;FHL1;MYL9;GNG11;LIMS1		negative regulation of cellular process (GO:0048523)	7/534	0.000622	0.352763	0	0	4.76677	35.1898	IFITM1;FHL1;F2R;ITGA1;TBX5;CYR61;CTGF		transferrin receptor binding (GO:1990459)	1/8	0.021793	1	0	0	45.4545	173.917	CD81		axolemma (GO:0030673)	1/6	0.0163889	0.81216	0	0	60.6061	249.161
												Hematopoietic PBMC BTO:0001008 81719202114 replicate02-5	8/502	6.43e-05	0.00587392	0	0	5.795	55.9298	CST3;PPP1R14A;CALD1;RARRES2;FHL1;MYL9;GNG11;LIMS1		epiboly involved in wound healing (GO:0090505)	2/14	0.000662	0.337572	0	0	51.9481	380.31	FLNA;CYR61		lipoprotein lipase activity (GO:0004465)	1/8	0.021793	1	0	0	45.4545	173.917	LIPG		lysosomal lumen (GO:0043202)	2/86	0.0234202	1	0	0	8.45666	31.7476
D	30	Term	Overlap	P-value	Adjusted P-value	Old P-value	Old Adjusted P-value	Odds Ratio	Combined Score	Genes		Term	Overlap	P-value	Adjusted P-value	Old P-value	Old Adjusted P-value	Odds Ratio	Combined Score	Genes		Term	Overlap	P-value	Adjusted P-value	Old P-value	Old Adjusted P-value	Odds Ratio	Combined Score	Genes		Term	Overlap	P-value	Adjusted P-value	Old P-value	Old Adjusted P-value	Odds Ratio	Combined Score	Genes		Term	Overlap	P-value	Adjusted P-value	Old P-value	Old Adjusted P-value	Odds Ratio	Combined Score
		bladder	14/195	5.54e-21	5.32e-19	0	0	47.8632	2232.43	TAGLN;FHL1;LMOD1;FAM129A;ACTG2;MYLK;ACTA2;CNN1;DES;CALD1;MUSTN1;FLNA;MYH11;MYL9		Brain SNB-75 BTO:0004222 SNB75 NCI60	7/257	8.43e-08	7.7e-05	0	0	18.1582	295.773	IFITM3;CNN1;TAGLN;CALD1;MAP1B;FLNA;MYL9		muscle contraction (GO:0006936)	9/137	3.22e-13	1.64e-09	0	0	43.7956	1259.72	ACTA2;ACTC1;DES;CALD1;LMOD1;MYH11;MYL9;ACTG2;MYLK		tropomyosin binding (GO:0005523)	2/14	0.000196	0.225277	0	0	95.2381	813.22	CALD1;LMOD1		actin cytoskeleton (GO:0015629)	6/294	4.23e-06	0.00188668	0	0	13.6054	168.344
		mammary gland non-lactating	3/201	0.00332431	0.159567	0	0	9.95025	56.781	NOTCH3;DES;FHL1		Hematopoietic PBMC BTO:0001008 81719202114 replicate01-1	7/503	7.52e-06	0.00343331	0	0	9.27767	109.456	CALD1;FHL1;FLNA;THBS1;CRIP1;MYL9;MYLK		positive regulation of macrophage chemotaxis (GO:0010759)	2/7	4.55e-05	0.115997	0	0	190.476	1904.5	RARRES2;THBS1		integrin binding (GO:0005178)	3/94	0.000372	0.21426	0	0	21.2766	167.996	COL3A1;THBS1;CTGF		cytoskeleton (GO:0005856)	7/520	9.34e-06	0.00208297	0	0	8.97436	103.933
		MEF	3/300	0.0100555	0.321776	0	0	6.66667	30.6642	CALD1;THBS1;CTGF		Hematopoietic PBMC BTO:0001008 81719202114 replicate01-2	7/503	7.52e-06	0.00228887	0	0	9.27767	109.456	CALD1;FHL1;FLNA;THBS1;CRIP1;MYL9;MYLK		positive regulation of macrophage migration (GO:1905523)	2/7	4.55e-05	0.0773315	0	0	190.476	1904.5	RARRES2;THBS1		collagen binding (GO:0005518)	2/52	0.00275282	1	0	0	25.641	151.157	SPARCL1;THBS1		filopodium (GO:0030175)	3/60	9.84e-05	0.014624	0	0	33.3333	307.56
		osteoblast day14	3/301	0.0101466	0.243517	0	0	6.64452	30.5025	ELN;MGP;THBS1		Hematopoietic PBMC BTO:0001008 81719202114 replicate01-5	7/503	7.52e-06	0.00171665	0	0	9.27767	109.456	CALD1;FHL1;FLNA;THBS1;CRIP1;MYL9;MYLK		regulation of mononuclear cell migration (GO:0071675)	2/12	0.000142	0.181434	0	0	111.111	984.239	RARRES2;THBS1		AT DNA binding (GO:0003680)	1/7	0.0104543	1	0	0	95.2381	434.356	CRIP1		actin-based cell projection (GO:0098858)	3/70	0.000156	0.0173685	0	0	28.5714	250.489
		uterus	2/141	0.0188684	0.362274	0	0	9.45626	37.5439	ACTA2;RARRES2		Hematopoietic PBMC BTO:0001008 81719202114 replicate01-3	7/504	7.62e-06	0.00139124	0	0	9.25926	109.119	CALD1;FHL1;FLNA;THBS1;CRIP1;MYL9;MYLK		skeletal myofibril assembly (GO:0014866)	2/12	0.000142	0.145148	0	0	111.111	984.239	ACTC1;MYH11		cadherin binding (GO:0045296)	3/313	0.0112769	1	0	0	6.38978	28.6581	NOTCH3;CALD1;FLNA		myofibril (GO:0030016)	2/27	0.000746	0.0665292	0	0	49.3827	355.605
		osteoblast day5	2/175	0.0282074	0.451319	0	0	7.61905	27.1861	THBS1;CTGF		Hematopoietic PBMC BTO:0001008 81719202114 replicate01-6	7/504	7.62e-06	0.00115937	0	0	9.25926	109.119	CALD1;FHL1;FLNA;THBS1;CRIP1;MYL9;MYLK		regulation of granulocyte chemotaxis (GO:0071622)	2/13	0.000168	0.142815	0	0	102.564	891.49	RARRES2;THBS1		platelet-derived growth factor binding (GO:0048407)	1/11	0.0163807	1	0	0	60.6061	249.191	COL3A1		focal adhesion (GO:0005925)	4/356	0.00187623	0.139467	0	0	7.49064	47.0299
		umbilical cord	2/208	0.0386934	0.530652	0	0	6.41026	20.8467	COL3A1;ELN		Hematopoietic PBMC BTO:0001008 81719202114 replicate01-4	7/507	7.92e-06	0.00103299	0	0	9.20447	108.117	CALD1;FHL1;FLNA;THBS1;CRIP1;MYL9;MYLK		smooth muscle contraction (GO:0006939)	2/14	0.000196	0.142682	0	0	95.2381	813.22	MYH11;MYLK		Ral GTPase binding (GO:0017160)	1/12	0.017857	1	0	0	55.5556	223.631	FLNA		actomyosin (GO:0042641)	2/48	0.0023505	0.14976	0	0	27.7778	168.142
												Breast Hs-578T BTO:0003885 HS578T NCI60	5/219	1.71e-05	0.00195656	0	0	15.2207	167.03	CNN1;TAGLN;CALD1;FHL1;MYL9		positive regulation of potassium ion transport (GO:0043268)	2/15	0.000226	0.14392	0	0	88.8889	746.368	FHL1;FLNA		DNA binding, bending (GO:0008301)	1/17	0.0252061	1	0	0	39.2157	144.34	CRIP1		actin filament (GO:0005884)	2/55	0.00307432	0.171394	0	0	24.2424	140.234
												Lung non-small lung cancer BTO:0002553 P005586-I	5/281	5.65e-05	0.00572711	0	0	11.8624	116.039	IFITM3;CNN1;TAGLN;FHL1;MYH11		regulation of macrophage chemotaxis (GO:0010758)	2/15	0.000226	0.127929	0	0	88.8889	746.368	RARRES2;THBS1		low-density lipoprotein particle binding (GO:0030169)	1/17	0.0252061	1	0	0	39.2157	144.34	THBS1		polymeric cytoskeletal fiber (GO:0099513)	3/221	0.00433648	0.214897	0	0	9.04977	49.237
												Hematopoietic PBMC BTO:0001008 81719202114 replicate03-2	6/488	7.38e-05	0.00674127	0	0	8.19672	77.9808	CALD1;RARRES2;FHL1;THBS1;MYL9;MYLK		muscle tissue morphogenesis (GO:0060415)	2/19	0.000366	0.18681	0	0	70.1754	555.275	ACTC1;MYLK		transforming growth factor beta binding (GO:0050431)	1/19	0.0281308	1	0	0	35.0877	125.294	THBS1		endoplasmic reticulum lumen (GO:0005788)	3/270	0.00754623	0.336562	0	0	7.40741	36.1978
												Hematopoietic PBMC BTO:0001008 81719202114 replicate03-1	6/491	7.64e-05	0.00633937	0	0	8.14664	77.2286	CALD1;RARRES2;FHL1;THBS1;MYL9;MYLK		regulation of chemotaxis (GO:0050920)	2/24	0.000588	0.272833	0	0	55.5556	413.255	RARRES2;THBS1		fibroblast growth factor binding (GO:0017134)	1/22	0.032502	1	0	0	30.303	103.832	THBS1		apical dendrite (GO:0097440)	1/8	0.0119392	0.484078	0	0	83.3333	368.994
E	5	Term	Overlap	P-value	Adjusted P-value	Old P-value	Old Adjusted P-value	Odds Ratio	Combined Score	Genes		Term	Overlap	P-value	Adjusted P-value	Old P-value	Old Adjusted P-value	Odds Ratio	Combined Score	Genes		Term	Overlap	P-value	Adjusted P-value	Old P-value	Old Adjusted P-value	Odds Ratio	Combined Score	Genes		Term	Overlap	P-value	Adjusted P-value	Old P-value	Old Adjusted P-value	Odds Ratio	Combined Score	Genes		Term	Overlap	P-value	Adjusted P-value	Old P-value	Old Adjusted P-value	Odds Ratio	Combined Score
		lung	3/354	5.36e-05	0.00514092	0	0	33.8983	333.385	SCGB1A1;SCGB3A2;CYP2F2												receptor-mediated endocytosis (GO:0006898)	1/188	0.0461	1	0	0	21.2766	65.4535	SCGB3A2		DNA binding (GO:0003677)	1/893	0.204202	1	0	0	4.47928	7.11598	NUPR1		endocytic vesicle lumen (GO:0071682)	1/18	0.00449229	1	0	0	222.222	1201.2
		lacrimal gland	2/749	0.0129894	0.623493	0	0	10.6809	46.3938	HP;NUPR1																																endocytic vesicle (GO:0030139)	1/108	0.0267124	1	0	0	37.037	134.171
		liver	2/928	0.0195838	0.626681	0	0	8.62069	33.9056	HP;CYP2F2																																cytoplasmic vesicle lumen (GO:0060205)	1/129	0.0318396	1	0	0	31.0078	106.885
F	22	Term	Overlap	P-value	Adjusted P-value	Old P-value	Old Adjusted P-value	Odds Ratio	Combined Score	Genes		Term	Overlap	P-value	Adjusted P-value	Old P-value	Old Adjusted P-value	Odds Ratio	Combined Score	Genes		Term	Overlap	P-value	Adjusted P-value	Old P-value	Old Adjusted P-value	Odds Ratio	Combined Score	Genes		Term	Overlap	P-value	Adjusted P-value	Old P-value	Old Adjusted P-value	Odds Ratio	Combined Score	Genes		Term	Overlap	P-value	Adjusted P-value	Old P-value	Old Adjusted P-value	Odds Ratio	Combined Score
		lung	5/354	3.47e-05	0.00333187	0	0	12.8403	131.851	CBR2;TMEM212;CCDC153;AU040972;ALDH1A1		Lung A-549 BTO:0000018 A549 NCI60	3/154	0.000619	0.565316	0	0	17.7096	130.822	TPPP3;ALDH1A1;KRT8		microtubule bundle formation (GO:0001578)	2/32	0.000562	1	0	0	56.8182	425.273	RSPH1;TPPP3		3-chloroallyl aldehyde dehydrogenase activity (GO:0004028)	2/8	3.22e-05	0.0370747	0	0	227.273	2350.73	ALDH3B1;ALDH1A1		polymeric cytoskeletal fiber (GO:0099513)	3/221	0.00175516	0.782803	0	0	12.3406	78.3035
		ovary	2/153	0.0121484	0.583125	0	0	11.8835	52.413	TMEM212;ALDH1A1		Colon Colo-205 BTO:0000179 6h P003892-1	3/180	0.000973	0.444339	0	0	15.1515	105.072	TPPP3;ALDH1A1;KRT8		cilium assembly (GO:0060271)	3/288	0.00371541	1	0	0	9.4697	52.9855	RSPH1;TUBA1A;DYNLRB2		oxidoreductase activity, acting on the aldehyde or oxo group of donors, NAD or NADP as acceptor (GO:0016620)	2/25	0.000341	0.19638	0	0	72.7273	580.578	ALDH3B1;ALDH1A1		outer dynein arm (GO:0036157)	1/9	0.00985841	1	0	0	101.01	466.609
		adipose white	2/199	0.019966	0.638913	0	0	9.13659	35.7581	TMEM212;CCDC153		Colon Colo-205 BTO:0000179 6h P003892-2	3/180	0.000973	0.296226	0	0	15.1515	105.072	TPPP3;ALDH1A1;KRT8		regulation of kinase activity (GO:0043549)	2/101	0.00546108	1	0	0	18.0018	93.7913	CDKN1C;PIFO		aldehyde dehydrogenase [NAD(P)+] activity (GO:0004030)	1/6	0.00658262	1	0	0	151.515	761.11	ALDH3B1		axonemal dynein complex (GO:0005858)	1/16	0.0174619	1	0	0	56.8182	229.985
		stomach	2/249	0.0302759	0.726623	0	0	7.30194	25.5378	CYP2S1;KRT8		Colon Colo-205 BTO:0000179 24h P003894-1	3/194	0.00121	0.275723	0	0	14.0581	94.4536	TPPP3;ALDH1A1;KRT8		antigen processing and presentation of endogenous peptide antigen (GO:0002483)	1/6	0.00658262	1	0	0	151.515	761.11	SEC14L3		retinal dehydrogenase activity (GO:0001758)	1/7	0.0076757	1	0	0	129.87	632.428	ALDH1A1		microtubule (GO:0005874)	2/210	0.0220792	1	0	0	8.65801	33.014
												Colon Colo-205 BTO:0000179 24h P003894-2	3/194	0.00120798	0.220578	0	0	14.0581	94.4536	TPPP3;ALDH1A1;KRT8		vesicle fusion with endoplasmic reticulum-Golgi intermediate compartment (ERGIC) membrane (GO:1990668)	1/6	0.00658262	1	0	0	151.515	761.11	SEC14L3		aldehyde dehydrogenase (NAD) activity (GO:0004029)	1/14	0.0152952	1	0	0	64.9351	271.443	ALDH1A1		cytoplasmic dynein complex (GO:0005868)	1/21	0.0228588	1	0	0	43.29	163.568
												Colon Colo-205 BTO:0000179 P003811	3/346	0.00619326	0.942408	0	0	7.88229	40.0759	TPPP3;ALDH1A1;KRT8		aldehyde catabolic process (GO:0046185)	1/6	0.00658262	1	0	0	151.515	761.11	ALDH3B1		arachidonic acid epoxygenase activity (GO:0008392)	1/17	0.0185435	1	0	0	53.4759	213.242	CYP2S1		phagocytic vesicle membrane (GO:0030670)	1/38	0.0409974	1	0	0	23.9234	76.4174
												Lung A-549 BTO:0000018 P001906	3/360	0.00690919	0.901155	0	0	7.57576	37.6887	TPPP3;ALDH3B1;ALDH1A1		plasma membrane bounded cell projection organization (GO:0120036)	2/118	0.00738119	1	0	0	15.4083	75.6367	MNS1;CFAP126		arachidonic acid monooxygenase activity (GO:0008391)	1/17	0.0185435	1	0	0	53.4759	213.242	CYP2S1		intermediate filament (GO:0005882)	1/46	0.0494216	1	0	0	19.7628	59.4341
												Colon HT55 PDB:200110 HT55 CRC65	3/443	0.0121569	1	0	0	6.15637	27.1487	TPPP3;ALDH3B1;ALDH1A1		regulation of cell projection organization (GO:0031344)	1/7	0.0076757	1	0	0	129.87	632.428	PIFO		gamma-tubulin binding (GO:0043015)	1/19	0.0207034	1	0	0	47.8469	185.524	PIFO		endoplasmic reticulum-Golgi intermediate compartment membrane (GO:0033116)	1/47	0.0504697	1	0	0	19.3424	57.7637
												Colon HT-29 BTO:0000182 HT29 NCI60	2/178	0.016188	1	0	0	10.2145	42.1193	ALDH1A1;KRT8		cilium organization (GO:0044782)	2/192	0.0186688	1	0	0	9.4697	37.6979	MNS1;CFAP126		oxidoreductase activity, acting on paired donors, with incorporation or reduction of molecular oxygen, reduced flavin or flavoprotein as one donor, and incorporation of one atom of oxygen (GO:0016712)	1/21	0.0228588	1	0	0	43.29	163.568	CYP2S1		microtubule cytoskeleton (GO:0015630)	2/388	0.0671986	1	0	0	4.68604	12.6528
												Colon Colo-205 BTO:0000179 12h P003893-1	2/183	0.0170564	1	0	0	9.93542	40.4494	ALDH1A1;KRT8		glyceraldehyde-3-phosphate metabolic process (GO:0019682)	1/18	0.0196241	1	0	0	50.5051	198.535	ALDH1A1		NAD binding (GO:0051287)	1/22	0.0239348	1	0	0	41.3223	154.232	ALDH1A1		intermediate filament cytoskeleton (GO:0045111)	1/71	0.0752944	1	0	0	12.8041	33.1159
G	24	Term	Overlap	P-value	Adjusted P-value	Old P-value	Old Adjusted P-value	Odds Ratio	Combined Score	Genes		Term	Overlap	P-value	Adjusted P-value	Old P-value	Old Adjusted P-value	Odds Ratio	Combined Score	Genes		Term	Overlap	P-value	Adjusted P-value	Old P-value	Old Adjusted P-value	Odds Ratio	Combined Score	Genes		Term	Overlap	P-value	Adjusted P-value	Old P-value	Old Adjusted P-value	Odds Ratio	Combined Score	Genes		Term	Overlap	P-value	Adjusted P-value	Old P-value	Old Adjusted P-value	Odds Ratio	Combined Score
		lung	8/354	5.11e-09	4.91e-07	0	0	18.8324	359.538	CLIC5;SDPR;RTKN2;EMP2;AKAP5;AGER;PRDX6;HOPX		Melanoma UACC-62 BTO:0004152 UACC62 NCI60	4/268	0.000271	0.247595	0	0	12.4378	102.148	LGALS3;ANXA5;TIMP3;PRDX6		regulation of cell differentiation (GO:0045595)	4/121	1.23e-05	0.0629334	0	0	27.5482	311.385	LGALS3;SPOCK2;EMP2;HOPX		metalloendopeptidase inhibitor activity (GO:0008191)	2/12	9.04e-05	0.104068	0	0	138.889	1293.21	SPOCK2;TIMP3		membrane raft (GO:0045121)	3/119	0.000379	0.169222	0	0	21.0084	165.48
		bladder	2/195	0.0226745	1	0	0	8.54701	32.3634	IGFBP2;KRT7		Ovary OVCAR-8/ADR BTO:0004189 3h P003847-1	3/157	0.000851	0.388443	0	0	15.9236	112.567	CAV1;ANXA5;TIMP3		bleb assembly (GO:0032060)	2/7	2.89e-05	0.0736716	0	0	238.095	2488.71	PMP22;EMP2		Rho GTPase binding (GO:0017048)	2/72	0.00335114	1	0	0	23.1481	131.909	CAV1;RTKN2		intermediate filament (GO:0005882)	2/46	0.00138302	0.308414	0	0	36.2319	238.532
		dorsal root ganglia	2/541	0.1366	1	0	0	3.08071	6.13278	SPOCK2;PMP22		Ovary OVCAR-8/ADR BTO:0004189 3h P003847-2	3/157	0.000851	0.258962	0	0	15.9236	112.567	CAV1;ANXA5;TIMP3		positive regulation of activated T cell proliferation (GO:0042104)	2/19	0.000233	0.396435	0	0	87.7193	733.703	IGFBP2;AGER		patched binding (GO:0005113)	1/6	0.00717924	1	0	0	138.889	685.633	CAV1		caveola (GO:0005901)	2/56	0.00204283	0.303701	0	0	29.7619	184.328
		kidney	2/554	0.141935	1	0	0	3.00842	5.87359	CYP4B1;TIMP3		Breast HCC-1937 BTO:0003323 HCC1937 R3-1	3/170	0.00107087	0.244427	0	0	14.7059	100.578	KRT7;TIMP3;PRDX6		positive regulation of cellular component movement (GO:0051272)	2/21	0.000286	0.364603	0	0	79.3651	647.638	SPOCK2;PDPN		protein phosphatase 2B binding (GO:0030346)	1/6	0.00717924	1	0	0	138.889	685.633	AKAP5		cytoplasmic vesicle (GO:0031410)	3/215	0.00209879	0.234015	0	0	11.6279	71.7023
		macrophage peri LPS thio 1hrs	2/598	0.160329	1	0	0	2.78707	5.10181	NFKBIA;PDPN		Breast MCF-7 BTO:0000093 HCC1937 R3-2	3/170	0.00107087	0.195541	0	0	14.7059	100.578	KRT7;TIMP3;PRDX6		regulation of NF-kappaB import into nucleus (GO:0042345)	2/26	0.000441	0.449764	0	0	64.1026	495.332	NFKBIA;AGER		endopeptidase inhibitor activity (GO:0004866)	2/111	0.00777954	1	0	0	15.015	72.9168	SPOCK2;TIMP3		intermediate filament cytoskeleton (GO:0045111)	2/71	0.00326043	0.290831	0	0	23.4742	134.411
		osteoblast day5	1/175	0.190263	1	0	0	4.7619	7.90166	IGFBP2		Glioma SF-268 BTO:0003772 P003376	3/222	0.00229889	0.349814	0	0	11.2613	68.4159	CAV1;ANXA5;TIMP3		negative regulation of endocytosis (GO:0045806)	2/28	0.000512	0.435287	0	0	59.5238	451.046	LGALS3;CAV1		insulin-like growth factor II binding (GO:0031995)	1/7	0.00837098	1	0	0	119.048	569.403	IGFBP2		lamellipodium membrane (GO:0031258)	1/8	0.00956134	0.710726	0	0	104.167	484.378
		stomach	1/249	0.259811	1	0	0	3.34672	4.51072	KRT8		Melanoma SK-MEL-28 BTO:0002131 SKMEL28 NCI60	3/230	0.00254167	0.331506	0	0	10.8696	64.9449	LGALS3;ANXA5;TIMP3		regulation of activated T cell proliferation (GO:0046006)	2/29	0.000549	0.400447	0	0	57.4713	431.428	IGFBP2;AGER		phospholipase inhibitor activity (GO:0004859)	1/8	0.00956134	1	0	0	104.167	484.378	ANXA5		microvillus membrane (GO:0031528)	1/8	0.00956134	0.609194	0	0	104.167	484.378
		mIMCD-3	1/300	0.30437	1	0	0	2.77778	3.3042	KRT7		Melanoma SK-MEL-2 BTO:0003476 SKMEL2 NCI60	3/236	0.00273382	0.311998	0	0	10.5932	62.5218	LGALS3;ANXA5;TIMP3		positive regulation of calcium ion transport (GO:0051928)	2/33	0.000712	0.454349	0	0	50.5051	366.012	LGALS3;CAV1		adenylate cyclase binding (GO:0008179)	1/10	0.011938	1	0	0	83.3333	369.003	AKAP5		perinuclear region of cytoplasm (GO:0048471)	3/378	0.0100979	0.562957	0	0	6.61376	30.393
		MEF	1/300	0.30437	1	0	0	2.77778	3.3042	SDPR		Melanoma UACC-257 BTO:0004233 UACC257 NCI60	3/275	0.00420267	0.426338	0	0	9.09091	49.7458	LGALS3;ANXA5;TIMP3		negative regulation of cell differentiation (GO:0045596)	3/150	0.000746	0.422711	0	0	16.6667	120.024	NFKBIA;CAV1;HOPX		lipase inhibitor activity (GO:0055102)	1/10	0.011938	1	0	0	83.3333	369.003	ANXA5		filopodium membrane (GO:0031527)	1/12	0.0143091	0.709097	0	0	69.4444	294.921
		osteoblast day14	1/301	0.305217	1	0	0	2.76855	3.28553	IGFBP2		Melanoma SK-MEL-5 BTO:0002134 SKMEL5 NCI60	3/277	0.00428864	0.391553	0	0	9.02527	49.2038	LGALS3;ANXA5;TIMP3		cellular response to peptide (GO:1901653)	2/41	0.00109974	0.561199	0	0	40.6504	276.938	CAV1;AGER		immunoglobulin binding (GO:0019865)	1/11	0.0131242	1	0	0	75.7576	328.28	LGALS3		invadopodium (GO:0071437)	1/12	0.0143091	0.638187	0	0	69.4444	294.921
H	87	Term	Overlap	P-value	Adjusted P-value	Old P-value	Old Adjusted P-value	Odds Ratio	Combined Score	Genes		Term	Overlap	P-value	Adjusted P-value	Old P-value	Old Adjusted P-value	Odds Ratio	Combined Score	Genes		Term	Overlap	P-value	Adjusted P-value	Old P-value	Old Adjusted P-value	Odds Ratio	Combined Score	Genes		Term	Overlap	P-value	Adjusted P-value	Old P-value	Old Adjusted P-value	Odds Ratio	Combined Score	Genes		Term	Overlap	P-value	Adjusted P-value	Old P-value	Old Adjusted P-value	Odds Ratio	Combined Score
		bladder	19/195	9.93e-21	9.53e-19	0	0	22.3991	1031.68	PPP1R14A;TAGLN;FHL1;ITGA1;LMOD1;FAM129A;ADAM33;ACTG2;MYLK;ACTA2;CNN1;CLEC3B;DES;CALD1;MUSTN1;FLNA;PDE5A;MYH11;MYL9		Brain SNB-75 BTO:0004222 SNB75 NCI60	11/257	1.51e-08	1.38e-05	0	0	9.83944	177.214	IFITM3;CNN1;TAGLN;COL4A2;COL4A1;CALD1;MAP1B;FLNA;VIM;CRYAB;MYL9		muscle contraction (GO:0006936)	12/137	7.49e-13	3.82e-09	0	0	20.1359	562.197	ACTA2;ACTC1;DES;CALD1;ITGA1;LMOD1;MYH11;VIM;CRYAB;MYL9;ACTG2;MYLK		platelet-derived growth factor binding (GO:0048407)	3/11	1.28e-05	0.0147227	0	0	62.6959	706.379	PDGFRB;COL3A1;COL4A1		focal adhesion (GO:0005925)	12/356	4.5e-08	2.01e-05	0	0	7.74893	131.083
		lung	10/354	3.17e-06	0.000152	0	0	6.49393	82.2145	PREX2;GUCY1A3;NOTCH3;PDZD2;GSN;ITGA1;MGP;TBX5;HIGD1B;GNG11		Brain SNB-75 BTO:0004222 P001561	12/331	2.02e-08	9.23e-06	0	0	8.3342	147.657	CNN1;POSTN;GSN;COL4A2;COL4A1;CALD1;MAP1B;EPB41L2;FLNA;CKB;CRYAB;FERMT2		extracellular matrix organization (GO:0030198)	9/229	6.83e-07	0.00174299	0	0	9.03478	128.263	POSTN;COL3A1;COL4A2;COL4A1;ELN;ITGA1;BGN;NF1;THBS1		integrin binding (GO:0005178)	5/94	5.62e-05	0.0323149	0	0	12.2279	119.68	COL3A1;S1PR3;THBS1;CYR61;CTGF		cytoskeleton (GO:0005856)	12/520	2.54e-06	0.000566	0	0	5.30504	68.3532
		osteoblast day21	8/264	1.97e-05	0.00063	0	0	6.96621	75.4821	POSTN;MGP;BGN;NDUFA4L2;ID3;LTBP2;S1PR3;THBS1		Lung non-small lung cancer BTO:0002553 P005586-I	10/281	3.94e-07	0.00012	0	0	8.18096	120.638	IFITM3;CNN1;POSTN;TAGLN;CLEC3B;CD81;COL4A1;FHL1;ITGA1;MYH11		regulation of cell migration (GO:0030334)	10/316	1.15e-06	0.00195279	0	0	7.27484	99.5014	PDGFRB;IFITM1;F2R;NF1;FLNA;TBX5;PLET1;THBS1;CYR61;MYLK		collagen binding (GO:0005518)	4/52	7.71e-05	0.029581	0	0	17.6835	167.469	ITGA1;ADGRG6;SPARCL1;THBS1		endoplasmic reticulum lumen (GO:0005788)	9/270	2.67e-06	0.000397	0	0	7.66284	98.3472
		osteoblast day14	8/301	5e-05	0.00120065	0	0	6.1099	60.506	POSTN;ELN;SDC2;MGP;ID3;LTBP2;S1PR3;THBS1		Breast Hs-578T BTO:0003885 HS578T NCI60	9/219	4.7e-07	0.000107	0	0	9.44733	137.653	CNN1;POSTN;TAGLN;COL4A1;CALD1;FHL1;VIM;MYL9;FERMT2		negative regulation of neurogenesis (GO:0050768)	4/33	1.24e-05	0.0158331	0	0	27.8649	314.788	COL3A1;ID2;NF1;ID3		AT DNA binding (GO:0003680)	2/7	0.000387	0.111441	0	0	65.6814	516.017	MAPT;CRIP1		filopodium (GO:0030175)	4/60	0.000135	0.0150802	0	0	15.3257	136.527
		umbilical cord	6/208	0.000295	0.00566685	0	0	6.6313	53.8994	POSTN;COL3A1;ELN;ITGA1;NDUFA4L2;FERMT2		Hematopoietic PBMC BTO:0001008 81719202114 replicate01-1	12/503	1.8e-06	0.000329	0	0	5.48434	72.5476	PPP1R14A;GSN;CALD1;FHL1;FLNA;PDE5A;MYL9;THBS1;CRIP1;GNG11;MYLK;LIMS1		negative regulation of viral entry into host cell (GO:0046597)	3/15	3.48e-05	0.035549	0	0	45.977	471.954	IFITM3;IFITM1;GSN		tropomyosin binding (GO:0005523)	2/14	0.00164532	0.378752	0	0	32.8407	210.503	CALD1;LMOD1		actin cytoskeleton (GO:0015629)	7/294	0.000296	0.0263786	0	0	5.47345	44.4777
		osteoblast day5	5/175	0.00100315	0.0160503	0	0	6.56814	45.3505	SDC2;ID3;THBS1;CYR61;CTGF		Hematopoietic PBMC BTO:0001008 81719202114 replicate01-2	12/503	1.8e-06	0.000274	0	0	5.48434	72.5476	PPP1R14A;GSN;CALD1;FHL1;FLNA;PDE5A;MYL9;THBS1;CRIP1;GNG11;MYLK;LIMS1		positive regulation of cellular biosynthetic process (GO:0031328)	6/159	6.82e-05	0.0580005	0	0	8.67491	83.2195	PDGFRB;EGR1;ZEB2;FAM129A;VIM;THBS1		transforming growth factor beta binding (GO:0050431)	2/19	0.0030484	0.584784	0	0	24.1984	140.185	LTBP2;THBS1		polymeric cytoskeletal fiber (GO:0099513)	6/221	0.000408	0.0303095	0	0	6.24122	48.7118
		MEF	6/300	0.00197893	0.0271396	0	0	4.5977	28.6216	CALD1;CRIM1;LTBP2;THBS1;CYR61;CTGF		Hematopoietic PBMC BTO:0001008 81719202114 replicate01-5	12/503	1.8e-06	0.000235	0	0	5.48434	72.5476	PPP1R14A;GSN;CALD1;FHL1;FLNA;PDE5A;MYL9;THBS1;CRIP1;GNG11;MYLK;LIMS1		cellular response to transforming growth factor beta stimulus (GO:0071560)	5/100	7.55e-05	0.0550092	0	0	11.4943	109.103	CLEC3B;COL3A1;LTBP2;FERMT2;LIMS1		lipoprotein particle binding (GO:0071813)	2/23	0.00445961	0.733287	0	0	19.99	108.2	MAPT;THBS1		cell cortex part (GO:0044448)	3/44	0.000926	0.0589747	0	0	15.674	109.484
		heart	7/568	0.0118737	0.142484	0	0	2.83309	12.5603	RGS5;ACTC1;ZBTB20;TBX5;CRYAB;HIGD1B;KCNK3		Hematopoietic PBMC BTO:0001008 81719202114 replicate01-3	12/504	1.84e-06	0.00021	0	0	5.47345	72.2909	PPP1R14A;GSN;CALD1;FHL1;FLNA;PDE5A;MYL9;THBS1;CRIP1;GNG11;MYLK;LIMS1		wound healing, spreading of cells (GO:0044319)	3/20	8.59e-05	0.0547985	0	0	34.4828	322.836	FLNA;PLET1;CYR61		metal ion binding (GO:0046872)	6/442	0.0126471	1	0	0	3.12061	13.6381	POSTN;CLEC3B;GSN;SPARCL1;SEPT4;THBS1		platelet dense granule lumen (GO:0031089)	2/14	0.00164532	0.0917264	0	0	32.8407	210.503
		mammary gland non-lactating	3/201	0.0573985	0.61225	0	0	3.43112	9.80524	NOTCH3;DES;FHL1		Hematopoietic PBMC BTO:0001008 81719202114 replicate01-6	12/504	1.84e-06	0.000186	0	0	5.47345	72.2909	PPP1R14A;GSN;CALD1;FHL1;FLNA;PDE5A;MYL9;THBS1;CRIP1;GNG11;MYLK;LIMS1		positive regulation of gene expression (GO:0010628)	12/771	0.000123	0.0700214	0	0	3.57798	32.1993	ACTA2;EGR1;GSN;ACTC1;ID2;F2R;FAM129A;VIM;TBX5;THBS1;ACTG2;LIMS1		sequence-specific double-stranded DNA binding (GO:1990837)	3/112	0.0128899	1	0	0	6.15764	26.7938	EGR1;MAPT;CRIP1		mitochondrial respiratory chain complex IV (GO:0005751)	2/17	0.00243818	0.120826	0	0	27.0453	162.718
		nucleus accumbens	4/383	0.085862	0.824275	0	0	2.40089	5.89421	GUCY1A3;GUCY1B3;GAP43;PDZD2		Hematopoietic PBMC BTO:0001008 81719202114 replicate01-4	12/507	1.95e-06	0.000178	0	0	5.44107	71.5287	PPP1R14A;GSN;CALD1;FHL1;FLNA;PDE5A;MYL9;THBS1;CRIP1;GNG11;MYLK;LIMS1		positive regulation of cell motility (GO:2000147)	6/179	0.000131	0.0668272	0	0	7.70564	68.8934	PDGFRB;F2R;PLET1;THBS1;CYR61;MYLK		myosin binding (GO:0017022)	2/46	0.0171028	1	0	0	9.995	40.6648	GSN;ACTC1		actin-based cell projection (GO:0098858)	3/70	0.00352715	0.157311	0	0	9.85222	55.6381
I	24	Term	Overlap	P-value	Adjusted P-value	Old P-value	Old Adjusted P-value	Odds Ratio	Combined Score	Genes		Term	Overlap	P-value	Adjusted P-value	Old P-value	Old Adjusted P-value	Odds Ratio	Combined Score	Genes		Term	Overlap	P-value	Adjusted P-value	Old P-value	Old Adjusted P-value	Odds Ratio	Combined Score	Genes		Term	Overlap	P-value	Adjusted P-value	Old P-value	Old Adjusted P-value	Odds Ratio	Combined Score	Genes		Term	Overlap	P-value	Adjusted P-value	Old P-value	Old Adjusted P-value	Odds Ratio	Combined Score
		lung	9/354	1.59e-10	1.53e-08	0	0	21.1864	477.959	ELOVL1;SLC34A2;CPM;SFTPB;LGI3;SFTPD;SFTPA1;CXCL15;ZDHHC3		Lung non-small lung cancer BTO:0002553 P005587-I	3/248	0.00314	1	0	0	10.0806	58.0853	NAPSA;FABP5;NPC2		surfactant homeostasis (GO:0043129)	4/6	2.39e-11	1.22e-07	0	0	555.556	13588	NAPSA;SFTPD;CTSH;SFTPA1		sodium ion binding (GO:0031402)	2/12	9.04e-05	0.104068	0	0	138.889	1293.21	SLC34A2;ATP1B1		lamellar body (GO:0042599)	5/15	4.75e-12	2.12e-09	0	0	277.778	7242.49
		lymph nodes	3/90	0.000167	0.00799414	0	0	27.7778	241.674	CD74;H2-AA;H2-AB1		Lung non-small lung cancer BTO:0002553 P005586-I	3/281	0.00446	1	0	0	8.8968	48.1473	NAPSA;NPC2;CTSH		chemical homeostasis within a tissue (GO:0048875)	4/6	2.39e-11	6.09e-08	0	0	555.556	13588	NAPSA;SFTPD;CTSH;SFTPA1		alkali metal ion binding (GO:0031420)	2/16	0.000164	0.0943305	0	0	104.167	907.936	SLC34A2;ATP1B1		multivesicular body (GO:0005771)	5/29	1.86e-10	4.14e-08	0	0	143.678	3219.33
		follicular B-cells	4/603	0.00537873	0.172119	0	0	5.52792	28.885	CD74;NAPSA;H2-AA;H2-AB1		Breast HMEpC BTO:0002178 HMEpC R3-1	3/328	0.00685	1	0	0	7.62195	37.981	FABP5;ZDHHC3;CTSC		cellular protein metabolic process (GO:0044267)	6/484	1.81e-05	0.0307696	0	0	10.3306	112.812	SLC34A2;SFTPB;NAPSA;SFTPD;CTSH;SFTPA1		MHC class II protein complex binding (GO:0023026)	2/16	0.000164	0.062887	0	0	104.167	907.936	CD74;ATP1B1		multivesicular body lumen (GO:0097486)	3/7	5.3e-08	7.87e-06	0	0	357.143	5983.45
		macrophage peri LPS thio 0hrs	3/353	0.00838186	0.201165	0	0	7.08215	33.8646	FABP5;NPC2;ZDHHC3		Breast MCF-7 BTO:0000093 HMEpC R3-2	3/328	0.00685	1	0	0	7.62195	37.981	FABP5;ZDHHC3;CTSC		pattern recognition receptor signaling pathway (GO:0002221)	3/48	2.53e-05	0.0323318	0	0	52.0833	551.198	SFTPD;SFTPA1;CD36		MHC protein complex binding (GO:0023023)	2/19	0.000233	0.067063	0	0	87.7193	733.703	CD74;ATP1B1		late endosome lumen (GO:0031906)	3/9	1.27e-07	1.42e-05	0	0	277.778	4411.04
		dendritic cells myeloid CD8a-	2/188	0.0211791	0.406639	0	0	8.86525	34.1732	CTSH;H2-AA		Colon HDC-135 PDB:200094 HDC-135 CRC65	3/388	0.0108	1	0	0	6.4433	29.1541	ELOVL1;NPC2;ATP1B1		toll-like receptor signaling pathway (GO:0002224)	3/86	0.000146	0.148537	0	0	29.0698	256.833	SFTPD;SFTPA1;CD36		exopeptidase activity (GO:0008238)	2/45	0.00132386	0.304752	0	0	37.037	245.452	CPM;CTSH		clathrin-coated endocytic vesicle (GO:0045334)	4/50	3.54e-07	3.16e-05	0	0	66.6667	990.289
		macrophage peri LPS thio 1hrs	3/598	0.0337647	0.540235	0	0	4.1806	14.1653	FABP5;NPC2;LYZ1		Lung NCI-H226 BTO:0003008 P001566	3/419	0.0133	1	0	0	5.96659	25.7626	ELOVL1;NPC2;ATP1B1		neutrophil degranulation (GO:0043312)	5/479	0.000225	0.191388	0	0	8.69868	73.0626	FABP5;NPC2;CTSH;CD36;CTSC		peptidase activity, acting on L-amino acid peptides (GO:0070011)	3/185	0.00136588	0.262022	0	0	13.5135	89.1345	NAPSA;CTSH;CTSC		lytic vacuole (GO:0000323)	5/183	2.24e-06	0.000167	0	0	22.7687	296.188
		microglia	1/90	0.102647	1	0	0	9.25926	21.0783	CTSC		Colon HDC-57 PDB:201057 HDC-57 CRC65	3/444	0.0156	1	0	0	5.63063	23.441	FABP5;ATP1B1;ZDHHC3		neutrophil activation involved in immune response (GO:0002283)	5/483	0.000234	0.170496	0	0	8.62664	72.1249	FABP5;NPC2;CTSH;CD36;CTSC		amyloid-beta binding (GO:0001540)	2/49	0.00156799	0.257822	0	0	34.0136	219.659	CD74;CD36		endocytic vesicle (GO:0030139)	4/108	7.86e-06	0.000501	0	0	30.8642	362.765
		adipose brown	2/456	0.103062	1	0	0	3.65497	8.30564	SCD1;CD36		Colon GP2d PDB:200089 GP2d CRC65	3/468	0.0179	1	0	0	5.34188	21.4936	ELOVL1;FABP5;ATP1B1		neutrophil mediated immunity (GO:0002446)	5/487	0.000243	0.154995	0	0	8.55578	71.2056	FABP5;NPC2;CTSH;CD36;CTSC		cysteine-type peptidase activity (GO:0008234)	2/65	0.00274105	0.394369	0	0	25.641	151.267	CTSH;CTSC		lysosome (GO:0005764)	6/422	8.3e-06	0.000463	0	0	11.8483	138.612
		spleen	1/100	0.113408	1	0	0	8.33333	18.1397	CD74		Colon C99 PDB:200070 C99 CRC65	3/485	0.0197	1	0	0	5.15464	20.2558	ELOVL1;ATP1B1;ZDHHC3		sterol transport (GO:0015918)	2/21	0.000286	0.162046	0	0	79.3651	647.638	NPC2;CD36		sodium ion transmembrane transporter activity (GO:0015081)	2/71	0.00326043	0.416973	0	0	23.4742	134.411	SLC34A2;ATP1B1		vacuolar lumen (GO:0005775)	4/161	3.79e-05	0.00187861	0	0	20.7039	210.773
		kidney	2/554	0.141935	1	0	0	3.00842	5.87359	S100G;NAPSA		Colon HDC-111 PDB:201056 HDC-111 CRC65	3/503	0.0216	1	0	0	4.97018	19.0564	ELOVL1;ATP1B1;ZDHHC3		proteolysis (GO:0006508)	4/291	0.000371	0.189188	0	0	11.4548	90.4927	CPM;NAPSA;CTSH;CTSC		cysteine-type endopeptidase activity (GO:0004197)	2/81	0.00422009	0.485732	0	0	20.5761	112.508	CTSH;CTSC		azurophil granule lumen (GO:0035578)	3/90	0.000167	0.00742789	0	0	27.7778	241.674
J	27	Term	Overlap	P-value	Adjusted P-value	Old P-value	Old Adjusted P-value	Odds Ratio	Combined Score	Genes		Term	Overlap	P-value	Adjusted P-value	Old P-value	Old Adjusted P-value	Odds Ratio	Combined Score	Genes		Term	Overlap	P-value	Adjusted P-value	Old P-value	Old Adjusted P-value	Odds Ratio	Combined Score	Genes		Term	Overlap	P-value	Adjusted P-value	Old P-value	Old Adjusted P-value	Odds Ratio	Combined Score	Genes		Term	Overlap	P-value	Adjusted P-value	Old P-value	Old Adjusted P-value	Odds Ratio	Combined Score
		mammary gland lact	6/104	4.63e-09	4.44e-07	0	0	42.735	820.131	COL9A1;TRF;CSN1S2A;CSN3;CSN1S1;LALBA		Colon HT-29 BTO:0000182 P001565	4/247	0.000319	0.290904	0	0	11.9958	96.5842	KRT18;EPCAM;LCN2;NF1		negative regulation of neural precursor cell proliferation (GO:2000178)	2/6	2.62e-05	0.133889	0	0	246.914	2604.53	ID2;NF1		cadherin binding involved in cell-cell adhesion (GO:0098641)	2/19	0.000296	0.340568	0	0	77.9727	633.569	KRT18;EPCAM		specific granule lumen (GO:0035580)	2/62	0.00316	1	0	0	23.8949	137.588
		salivary gland	5/480	0.000407	0.0195223	0	0	7.71605	60.2423	FXYD3;TESC;AQP5;KCNN4;CAR6		Colon HCA-46 PDB:200092 HCA-46 CRC65	4/518	0.00486	1	0	0	5.72001	30.4641	EPCAM;FXYD3;NF1;ALDOC		glycolytic process through glucose-6-phosphate (GO:0061620)	2/25	0.000517	1	0	0	59.2593	448.498	ALDOC;ENO1		protein binding involved in cell-cell adhesion (GO:0098632)	2/21	0.000363	0.208773	0	0	70.5467	558.853	KRT18;EPCAM		bicellular tight junction (GO:0005923)	2/72	0.00423	0.943779	0	0	20.5761	112.449
		adipose white	2/199	0.0293719	0.939902	0	0	7.44463	26.2625	CSN1S2A;CSN1S1		Cecum LS513 PDB:200123 LS513 CRC65	4/582	0.00732	1	0	0	5.091	25.0352	EPCAM;FXYD3;LCN2;ALDOC		canonical glycolysis (GO:0061621)	2/25	0.000517	0.878598	0	0	59.2593	448.498	ALDOC;ENO1		phosphatidylethanolamine binding (GO:0008429)	1/6	0.00807363	1	0	0	123.457	594.957	NF1		FACIT collagen trimer (GO:0005593)	1/6	0.00807	1	0	0	123.457	594.957
		placenta	2/411	0.105669	1	0	0	3.60458	8.10108	KRT18;FOLR1		Colon C106 PDB:200063 C106 CRC65	3/354	0.0117	1	0	0	6.27746	27.9016	EPCAM;ALDOC;KCNN4		glucose catabolic process to pyruvate (GO:0061718)	2/25	0.000517	0.658948	0	0	59.2593	448.498	ALDOC;ENO1		cadherin binding (GO:0045296)	3/313	0.00840874	1	0	0	7.09975	33.9261	KRT18;EPCAM;ENO1		secretory granule lumen (GO:0034774)	3/317	0.00871	0.970622	0	0	7.01016	33.2551
		cerebellum	2/428	0.113039	1	0	0	3.46141	7.54594	SHF;ALDOC		Breast HCC-202 PDB:200003 HCC202 R3-1	3/368	0.013	1	0	0	6.03865	26.211	KRT18;IGFBP5;ALDOC		artery morphogenesis (GO:0048844)	2/30	0.000746	0.761208	0	0	49.3827	355.605	NF1;FOLR1		aldehyde-lyase activity (GO:0016832)	1/7	0.00941312	1	0	0	105.82	493.72	ALDOC		cell cortex region (GO:0099738)	1/11	0.0147537	1	0	0	67.3401	283.923
		kidney	2/554	0.171253	1	0	0	2.67415	4.71885	CLDN10;FOLR1		Breast MCF-7 BTO:0000093 HCC202 R3-2	3/368	0.013	1	0	0	6.03865	26.211	KRT18;IGFBP5;ALDOC		negative regulation of neurogenesis (GO:0050768)	2/33	0.000903	0.768038	0	0	44.8934	314.691	ID2;NF1		insulin-like growth factor II binding (GO:0031995)	1/7	0.00941312	1	0	0	105.82	493.72	IGFBP5		specific granule (GO:0042581)	2/160	0.019583	1	0	0	9.25926	36.4176
		uterus	1/141	0.17399	1	0	0	5.25348	9.18706	LCN2		Ovary OVCAR-5 BTO:0001870 P003363	3/371	0.0133	1	0	0	5.98982	25.8688	KRT18;EPCAM;LCN2		negative regulation of cell proliferation (GO:0008285)	4/363	0.00135	0.98141	0	0	8.16243	53.9573	IGFBP5;TESC;ID2;NF1		hydrolase activity, acting on carbon-nitrogen (but not peptide) bonds, in linear amidines (GO:0016813)	1/10	0.0134212	1	0	0	74.0741	319.328	ARG1		keratin filament (GO:0045095)	1/15	0.0200666	1	0	0	49.3827	193.022
		C2C12	1/167	0.202716	1	0	0	4.43557	7.07896	DUOXA1		Colon HDC-114 PDB:200093 HDC-114 CRC65	3/388	0.015	1	0	0	5.72738	24.0504	EPCAM;FXYD3;ALDOC		gluconeogenesis (GO:0006094)	2/41	0.00139	0.888659	0	0	36.1337	237.622	ALDOC;ENO1		insulin-like growth factor I binding (GO:0031994)	1/13	0.0174136	1	0	0	56.9801	230.798	IGFBP5		intrinsic component of the cytoplasmic side of the plasma membrane (GO:0031235)	1/15	0.0200666	1	0	0	49.3827	193.022
		macrophage bone marrow 0hr	1/180	0.216715	1	0	0	4.11523	6.29288	KCNN4		Melanoma A-375 BTO:0002806 SDC Rep1	2/146	0.0165	1	0	0	10.1471	41.6569	ALDOC;ENO1		transmembrane transport (GO:0055085)	4/378	0.00156	0.885798	0	0	7.83853	50.6496	FXYD3;CSN3;AQP5;CSN1S1		water transmembrane transporter activity (GO:0005372)	1/13	0.0174136	1	0	0	56.9801	230.798	AQP5		anchored component of external side of plasma membrane (GO:0031362)	1/18	0.0240331	1	0	0	41.1523	153.429
		bladder	1/195	0.232575	1	0	0	3.79867	5.54053	DUOXA1		Colon HCC-2998 BTO:0003322 P0001568	3/408	0.0171	1	0	0	5.44662	22.1453	KRT18;EPCAM;ENO1		hexose biosynthetic process (GO:0019319)	2/44	0.0016	0.818125	0	0	33.67	216.692	ALDOC;ENO1		water channel activity (GO:0015250)	1/13	0.0174136	1	0	0	56.9801	230.798	AQP5		intrinsic component of external side of plasma membrane (GO:0031233)	1/22	0.0292978	1	0	0	33.67	118.863
[truncated: 37 more columns]

## Sheet: STable 6 (Fig3A)
Transcription factor (TF) network analysis from Figure 3A
Gene	TF	score (filtered >21)	gene expression (up or down regulated)
Slc2a1	Ahr::Arnt	21.26	UP
Nek2	Alx1	22.2481	UP
Sytl1	Bach1::Mafk	21.2258	DOWN
Macrod1	Bach1::Mafk	21.0821	DOWN
4930412C18Rik	Bach1::Mafk	22.1702	DOWN
4930413F20Rik	Bach1::Mafk	21.0821	DOWN
Gpr161	Bach1::Mafk	21.0821	UP
Renbp	Bach1::Mafk	21.4401	UP
Ankrd55	Bach1::Mafk	22.1702	UP
Magt1	Bach1::Mafk	21.0821	UP
Matn2	Bach1::Mafk	21.2158	UP
Tdrd9	Bach1::Mafk	21.0821	UP
Slc10a6	EBF1	21.088	UP
Bmf	ESR1	23.7287	DOWN
Aqp3	ESR1	21.4827	UP
Samd5	ESR1	23.4236	UP
Pde2a	Esrra	22.8592	UP
Nrarp	ESRRB	21.5753	UP
Ggnbp1	Foxk1	21.0289	DOWN
Ccdc181	Foxk1	21.1805	DOWN
Spats2l	Foxk1	21.0277	UP
Ggnbp1	Foxk1_1	21.0289	DOWN
Ccdc181	Foxk1_1	21.1805	DOWN
Spats2l	Foxk1_1	21.0277	UP
Gbp6	Hmx2	22.2455	UP
Gbp6	Hmx3	22.2906	UP
Slc39a14	HNF1B	21.2122	UP
Clic6	Hnf4a	22.3274	DOWN
Ctsb	Hnf4a	21.2042	UP
Cryba4	Hnf4a	21.8098	UP
Radil	Klf12	21.0187	UP
Rgs5	Klf4	21.2859	UP
Krt9	Lhx3	21.0748	DOWN
Gm13212	Lhx3	21.0865	UP
Chrna1	Lhx3	21.2503	UP
D030045P18Rik	Lhx3	21.1633	UP
Cxcl14	Lmx1a	21.1287	UP
Tgm5	Mecom	21.2893	UP
Arhgef4	Mycn	21.9936	DOWN
Sytl1	Nfe2l2	21.1913	DOWN
Ankrd55	Nfe2l2	21.4661	UP
Cit	NFYA	21.0233	UP
Akr1b3	NFYA	21.236	UP
Gm6644	NFYA	21.236	UP
Asphd2	Nr1h3::Rxra	21.1453	UP
Speg	Nr2e1	23.9149	UP
Atat1	Nr2f6	23.3636	DOWN
Nbl1	Nr2f6	23.4643	UP
Stx1b	Nr2f6	22.351	UP
Slc26a6	Nr2f6	22.6561	UP
Limk2	Nr2f6	23.4643	UP
Foxn1	Nr2f6(var.2)	22.8142	DOWN
Muc13	Nr2f6(var.2)	21.0286	UP
Rap1gap2	Nr5a2	21.0145	DOWN
Ccnjl	Nr5a2	21.0145	DOWN
Tead4	Nr5a2	21.5941	DOWN
Fam131c	Nr5a2	21.5941	DOWN
Syne4	Nr5a2	21.0145	DOWN
Cfp	Nr5a2	21.5941	DOWN
Plxna3	Nr5a2	21.0145	DOWN
Gfap	Nr5a2	21.5941	DOWN
Trem1	Nr5a2	21.0145	DOWN
Eps8l1	Nr5a2	21.0145	DOWN
Nabp1	Nr5a2	21.5941	DOWN
Rsph9	Nr5a2	21.0145	DOWN
Zfp773	Nr5a2	21.0145	DOWN
Bnipl	Nr5a2	21.5941	DOWN
Il17re	Nr5a2	21.0145	DOWN
Fchsd1	Nr5a2	21.5941	DOWN
Magix	Nr5a2	21.5941	DOWN
Gm13807	Nr5a2	21.5941	DOWN
Nckap5l	Nr5a2	21.6189	UP
Hic1	Nr5a2	21.5941	UP
Apold1	Nr5a2	21.6189	UP
C1rb	Nr5a2	21.0145	UP
Pparg	Nr5a2	21.0145	UP
Smim13	Nr5a2	21.0145	UP
Gareml	Nr5a2	21.6189	UP
Slc7a7	Nr5a2	21.6189	UP
Prkar1b	Nr5a2	21.5941	UP
Xpnpep2	Nr5a2	21.5941	UP
Gpx3	Nr5a2	21.6189	UP
Il2ra	Nr5a2	21.5941	UP
Mcm5	Nr5a2	21.0145	UP
Mt2	Nr5a2	21.5941	UP
Plat	Nr5a2	21.5941	UP
Srm	Nr5a2	21.6189	UP
Tk1	Nr5a2	21.0145	UP
Notch4	Nr5a2	21.0145	UP
Rab33a	Nr5a2	21.5941	UP
Timp3	Nr5a2	21.5941	UP
Racgap1	Nr5a2	21.0145	UP
Pkd1	Nr5a2	21.5941	UP
Hspb7	Nr5a2	21.5941	UP
Camkk1	Nr5a2	21.0145	UP
As3mt	Nr5a2	21.5941	UP
Adamdec1	Nr5a2	21.5941	UP
C1ra	Nr5a2	21.0145	UP
Lrrk2	Nr5a2	21.0145	UP
Ccdc109b	Nr5a2	21.0145	UP
Jakmip3	Nr5a2	21.6189	UP
Gys1	Nr5a2	21.0145	UP
Hspb8	Nr5a2	21.0145	UP
Tshz2	Nr5a2	21.5941	UP
Acot2	Nr5a2	21.6189	UP
Slc39a14	Nr5a2	21.0145	UP
Tspan10	Nr5a2	21.0145	UP
Kif22	Nr5a2	21.5941	UP
Gpr4	Nr5a2	21.5941	UP
Leprel4	Nr5a2	21.5941	UP
Ugt1a5	Nr5a2	21.0145	UP
Fam219aos	Nr5a2	21.0145	UP
Dnah8	Pknox1	21.1672	UP
Itsn1	Pou2f3	21.005	UP
Ano4	Pou3f1	21.6799	DOWN
Fgfr2	Pou3f1	22.0776	DOWN
Lrrc32	Pou3f1	22.3071	UP
Ldlr	Pou3f1	21.1167	UP
Chrna1	Pou3f1	22.0776	UP
Cd38	Pou3f1	22.0776	UP
Slc43a3	Pou3f1	21.0956	UP
Mastl	Pou3f1	22.3071	UP
Tppp3	Pou3f1	21.9195	UP
Palm3	Pou3f1	22.1091	UP
Spsb1	Pou3f1	22.3071	UP
D030045P18Rik	Pou3f1	21.7496	UP
C230029M16	Pou3f1	22.0776	UP
Adam23	Pou3f3	21.425	UP
Fgfr2	Pou3f4	21.1198	DOWN
Chrna1	Pou3f4	21.1198	UP
Cd38	Pou3f4	21.1198	UP
Spsb1	Pou3f4	21.1198	UP
C230029M16	Pou3f4	21.1198	UP
Nrarp	Pou5f1::Sox2	21.5753	UP
Speg	Prrx2	25.3008	UP
Ablim2	Rarb	21.2747	DOWN
Krt79	Rarb	22.226	UP
Cend1	Rarb(var.2)	22.4151	UP
Kdelr2	Rarb(var.2)	22.7383	UP
Acot6	Rarg	22.5641	DOWN
Gm13807	Rarg	21.4347	DOWN
Muc13	Rarg	22.0041	UP
Krt79	Rarg	25.2765	UP
Slc16a8	Rarg(var.2)	24.7894	DOWN
Tlr3	Rarg(var.2)	23.1313	DOWN
Muc15	Rarg(var.2)	24.6364	DOWN
Tmem252	Rarg(var.2)	22.7922	UP
Dync2li1	Rfx1	21.837	DOWN
Pnmal2	Rfx1	21.0219	UP
Enox1	Rfx1	21.5322	UP
Speg	Rfx1	25.3008	UP
Nr2f2	Rfx1	21.5322	UP
Pla2g2e	Rfx1	21.2914	UP
BC100451	Rfx1	21.0219	UP
1700010I14Rik	Rfx1	21.2914	UP
Tmem121	Rfx1	21.5322	UP
Ppm1e	Rfx1	21.5322	UP
Radil	Rfx1	21.2914	UP
Phldb3	Rxra	21.2558	DOWN
Atat1	Rxra	24.5176	DOWN
Clic6	Rxra	21.0004	DOWN
Nbl1	Rxra	25.8113	UP
Stx1b	Rxra	21.4149	UP
Slc26a6	Rxra	22.6863	UP
Limk2	Rxra	25.8113	UP
Edn1	Sox1	23.8336	DOWN
Arhgef4	Sox2	21.2711	DOWN
Cd180	SPI1	21.8933	DOWN
Mamdc2	SPI1	21.4068	DOWN
Pla2g4a	SPI1	24.0123	UP
Pla2g15	SPI1	23.1954	UP
Bmf	Spz1	23.2546	DOWN
Slc6a14	T	21.0918	DOWN
Slc2a1	T	21.9181	UP
Adamts10	Tcf21	21.0476	UP
1190007I07Rik	Tcf7	21.3394	DOWN
Ckmt1	Tcf7	21.3394	DOWN
Egflam	Tcf7	21.3394	UP
Cyp51	Tcf7	21.3394	UP
Dennd2a	Tcf7	21.3394	UP
Fam83a	Vdr	21.5008	UP
Pacsin3	Vsx1	21.1789	DOWN
Kcnh1	Zfp281_1	21.6065	DOWN
Lrba	Zfp281_1	21.6065	DOWN
Mamld1	Zfp281_1	21.6065	DOWN
1190007I07Rik	Zfp281_1	21.6065	DOWN
Itgb6	Zfp281_1	21.6065	DOWN
Slc8b1	Zfp281_1	21.6065	DOWN
Grin1	Zfp281_1	21.6065	DOWN
Gm15816	Zfp281_1	21.6065	DOWN
Sybu	Zfp281_1	21.6065	DOWN
Esrp1	Zfp281_1	21.6065	DOWN
Ltbp3	Zfp281_1	21.6065	DOWN
Cxcl2	Zfp281_1	21.6065	DOWN
Aldoc	Zfp281_1	21.6065	DOWN
Arid3b	Zfp281_1	21.6065	DOWN
Ptpn4	Zfp281_1	21.6065	DOWN
Lpar2	Zfp281_1	21.6065	DOWN
Tcte2	Zfp281_1	21.6065	DOWN
Palmd	Zfp281_1	21.6065	DOWN
Xk	Zfp281_1	21.6065	DOWN
Gmpr	Zfp281_1	21.6065	DOWN
Krt80	Zfp281_1	21.6065	DOWN
Rab11fip1	Zfp281_1	21.6065	DOWN
Ifi27l2a	Zfp281_1	21.6065	DOWN
Mfsd6l	Zfp281_1	21.6065	DOWN
Lppr4	Zfp281_1	21.6065	DOWN
Dpp10	Zfp281_1	21.6065	DOWN
D030025P21Rik	Zfp281_1	21.6065	DOWN
BC039771	Zfp281_1	21.6065	DOWN
4833427F10Rik	Zfp281_1	21.6065	DOWN
C330022C24Rik	Zfp281_1	21.6065	DOWN
Prkg1	Zfp281_1	21.6065	UP
Maf	Zfp281_1	21.6065	UP
Hsd11b1	Zfp281_1	21.6065	UP
Nts	Zfp281_1	21.6065	UP
Col18a1	Zfp281_1	21.6065	UP
Slc6a8	Zfp281_1	21.6065	UP
Cadm2	Zfp281_1	21.6065	UP
Cd97	Zfp281_1	21.6065	UP
Fkbp10	Zfp281_1	21.6065	UP
Slc52a3	Zfp281_1	21.6065	UP
Abat	Zfp281_1	21.6065	UP
Dclk1	Zfp281_1	21.6065	UP
Hs3st5	Zfp281_1	21.6065	UP
Whrn	Zfp281_1	21.6065	UP
Slit2	Zfp281_1	21.6065	UP
Mdk	Zfp281_1	21.6065	UP
Mecom	Zfp281_1	21.6065	UP
Gabrb1	Zfp281_1	21.6065	UP
Has2	Zfp281_1	21.6065	UP
Hoxa4	Zfp281_1	21.6065	UP
Icam5	Zfp281_1	21.6065	UP
Il3ra	Zfp281_1	21.6065	UP
Itgav	Zfp281_1	21.6065	UP
Kcnj4	Zfp281_1	21.6065	UP
Marcks	Zfp281_1	21.6065	UP
Pde8a	Zfp281_1	21.6065	UP
Pip4k2a	Zfp281_1	21.6065	UP
Capn7	Zfp281_1	21.6065	UP
Ace	Zfp281_1	21.6065	UP
Igf2	Zfp281_1	21.6065	UP
Kdr	Zfp281_1	21.6065	UP
Loxl1	Zfp281_1	21.6065	UP
Ccl2	Zfp281_1	21.6065	UP
Wnt10b	Zfp281_1	21.6065	UP
Aplnr	Zfp281_1	21.6065	UP
Itgb7	Zfp281_1	21.6065	UP
Epb4.1l3	Zfp281_1	21.6065	UP
Plcl2	Zfp281_1	21.6065	UP
Axin2	Zfp281_1	21.6065	UP
Slit1	Zfp281_1	21.6065	UP
Mpp2	Zfp281_1	21.6065	UP
Ramp3	Zfp281_1	21.6065	UP
Chst5	Zfp281_1	21.6065	UP
Fabp7	Zfp281_1	21.6065	UP
Sv2a	Zfp281_1	21.6065	UP
Dab2	Zfp281_1	21.6065	UP
Steap1	Zfp281_1	21.6065	UP
3830403N18Rik	Zfp281_1	21.6065	UP
Zfp618	Zfp281_1	21.6065	UP
Npl	Zfp281_1	21.6065	UP
5730559C18Rik	Zfp281_1	21.6065	UP
Lca5	Zfp281_1	21.6065	UP
Tgfbr2	Zfp281_1	21.6065	UP
Zfp423	Zfp281_1	21.6065	UP
Pcdhgc3	Zfp281_1	21.6065	UP
Tbx6	Zfp281_1	21.6065	UP
Mrgprf	Zfp281_1	21.6065	UP
Alox12e	Zfp281_1	21.6065	UP
Nrn1	Zfp281_1	21.6065	UP
Fkbp14	Zfp281_1	21.6065	UP
Scara3	Zfp281_1	21.6065	UP
Tbx4	Zfp281_1	21.6065	UP
Man2a2	Zfp281_1	21.6065	UP
Nxpe4	Zfp281_1	21.6065	UP
Gimap5	Zfp281_1	21.6065	UP
Rhof	Zfp281_1	21.6065	UP
Nyap1	Zfp281_1	21.6065	UP
Leprel4	Zfp281_1	21.6065	UP
Fam43a	Zfp281_1	21.6065	UP
Tmem252	Zfp281_1	21.6065	UP
Rtn4rl2	Zfp281_1	21.6065	UP
4933412E12Rik	Zfp281_1	21.6065	UP
D330050G23Rik	Zfp281_1	21.6065	UP

## Sheet: STable 7 (Fig4A - EMT)
Comparison of EMT-related DEG in RNAseq and ChIP seq data from Primed/Naïve mouse pluripotent stem cells and EL/PT cells. Diagram on Figure 4A.
EL1	EL2	EL3	PT1	PT2	PT3	logFC_ELvsPT	logCPM	LR	PValue	FDR	mgi_symbol		Naive_1	Naive_2	Primed_1	Primed_2	logFC_PrimedvsNaive	logCPM	LR	PValue	FDR	mgi_symbol		Label
166.779	157.755	147.345	26.2938	24.9033	20.9938	2.71038	6.46247	1383.5	8.07e-303	2.81e-301	Acta2		1.13279	1.42506	8.88206	7.10266	2.63804	2.27232	39.3939	3.46e-10	1.7e-08	Acta2		DEG
34.6066	36.8262	31.7748	37.6171	37.1722	35.3055	-0.0927662	5.15948	1.77577	0.18267	0.227286	Aplp1		1.54471	0.916111	3.35343	2.54624	1.26978	1.20413	7.22948	0.00717158	0.0463853	Aplp1
217.09	250.958	250.121	505.462	537.275	552.87	-1.15184	8.59769	358.723	5.34e-80	5.13e-79	Basp1		27.5989	23.6153	121.267	107.344	2.15828	6.13182	60.0359	9.31e-15	1.07e-12	Basp1		DEG
10.0067	9.88192	10.9665	1.63316	1.72287	0.99733	2.82711	2.43924	260.655	1.24e-58	9.46e-58	Bdnf		1.33875	2.34117	2.9909	4.15439	0.93468	1.52465	4.30348	0.0380346	0.167862	Bdnf
824.026	787.995	768.079	108.442	100.762	102.426	2.93334	8.79881	3095.51	0	0	Bmp1		2.05962	1.11969	9.33523	8.71081	2.49858	2.45429	37.2038	1.06e-09	4.75e-08	Bmp1		DEG
53.7862	56.1635	50.6851	101.147	102.694	101.977	-0.928979	6.30175	321.715	6.13e-72	5.39e-71	Cadm1		67.1435	70.6423	85.8297	80.2734	0.269973	6.25137	1.04771	0.306036	0.637449	Cadm1
904.497	888.094	944.035	1279.25	1234.67	1271	-0.467855	10.0872	90.4845	1.86e-21	7.65e-21	Cald1		12.7696	10.3826	30.4528	31.2249	1.41242	4.4176	23.3723	1.33e-06	2.94e-05	Cald1
1052.1	1103.65	1148.11	428.595	426.593	415.737	1.37829	9.57094	738.245	1.44e-162	2.62e-161	Calu		544.357	674.665	410.569	531.761	-0.371546	9.07825	1.03708	0.308502	0.640319	Calu
256.422	249.536	258.276	164.187	163.255	158.077	0.654694	7.69695	239.397	5.32e-54	3.84e-53	Capg		9.1653	8.75395	11.9636	24.6583	1.0209	3.77851	7.35218	0.00669815	0.0440431	Capg
295.059	320.345	314.304	231.146	244.334	239.16	0.37939	8.09607	65.464	5.92e-16	2.04e-15	Ccn1		7.10568	6.61636	41.9632	38.3276	2.54751	4.56455	70.1691	5.44e-17	8.08e-15	Ccn1
339.325	399.614	372.721	1036.13	1097.36	1069.29	-1.52666	9.49459	605.483	1.07e-133	1.63e-132	Ccn2		13.7994	9.56827	46.5855	37.3895	1.84649	4.75639	35.0586	3.2e-09	1.28e-07	Ccn2		DEG
313.336	354.399	347.133	213.889	217.813	215.473	0.648952	8.10949	160.201	1.02e-36	5.8e-36	Cd44		0.720866	0.50895	1.9033	2.1442	1.68921	0.592274	9.92757	0.00162821	0.0139375	Cd44
775.313	713.916	731.172	7.73028	6.94369	10.9706	6.42916	8.53218	5284.23	0	0	Cdh11		0.823847	0.814321	2.35647	2.1442	1.45074	0.796176	8.62456	0.0033166	0.0251385	Cdh11		DEG
12.6474	14.9295	17.9964	8.81905	8.40552	9.32504	0.778083	3.5604	35.7552	2.24e-09	5.82e-09	Cdh2		4.01626	3.56265	6.97876	4.95846	0.667526	2.35242	3.20414	0.073452	0.267997	Cdh2
22.1677	20.9013	23.4796	60.5357	60.8748	63.3803	-1.47328	5.43476	512.419	1.89e-113	2.43e-112	Col11a1		8.44443	9.16111	3.71597	3.35031	-1.30749	2.68088	13.7155	0.000212687	0.00248205	Col11a1		DEG
1179.13	1390.37	1423.47	62.3866	58.8908	57.4462	4.48183	9.43308	3023.71	0	0	Col12a1		0.205962	0	2.08457	2.01019	4.15892	0.340674	29.9349	4.47e-08	1.39e-06	Col12a1		DEG
8859.29	8726.88	8799.59	76.0507	81.6014	89.1115	6.73979	12.1145	6212.14	0	0	Col1a1		0.720866	0.916111	1.17823	0.670062	0.221756	0.133938	0.139279	0.708998	0.899664	Col1a1
5865.05	5684.38	5842.91	58.4126	60.6137	67.0705	6.54538	11.5144	6785.08	0	0	Col1a2		2.1626	1.93401	8.7008	7.10266	1.94819	2.37104	25.3627	4.75e-07	1.16e-05	Col1a2		DEG
8718.85	8227.52	8921.34	39.4135	41.8188	60.1889	7.51385	12.0803	2283.11	0	0	Col3a1		0	0.10179	1.54077	1.20611	4.44901	-0.122322	22.8654	1.74e-06	3.71e-05	Col3a1		DEG
1601.63	1417.74	1549.73	27.7637	26.1563	30.0196	5.7653	9.5911	5598.68	0	0	Col4a1		34.2926	25.7529	55.8301	40.2037	0.679853	5.29466	5.1752	0.0229115	0.114301	Col4a1
1009.78	918.877	981.926	18.2369	17.4897	18.4506	5.74673	8.93657	7152.97	0	0	Col4a2		21.0081	21.0705	29.909	31.0909	0.534888	4.69808	3.72101	0.053732	0.214641	Col4a2
1716.43	1758.91	1720.97	13.9907	13.783	15.6581	6.90017	9.76311	9725.72	0	0	Col5a1		7.31164	4.68234	14.3201	9.51488	0.998149	3.20007	7.29916	0.00689868	0.045056	Col5a1
2523.5	2521.38	2621.77	25.1506	21.1965	29.0722	6.66588	10.3286	4846.66	0	0	Col5a2		5.56097	5.90383	16.9484	23.4522	1.80948	3.70922	28.5925	8.93e-08	2.61e-06	Col5a2		DEG
672.883	628.035	626.076	4.89947	4.75095	7.38024	6.81249	8.32142	7007.7	0	0	Col5a3		0.411924	0.30537	0.725066	0.268025	0.541007	-0.61447	0.454131	0.50038	0.798028	Col5a3
77.9691	71.3063	78.3826	4.57284	6.21278	4.28852	3.91606	5.25546	1780.85	0	0	Col7a1		0.823847	0.916111	4.25977	2.27821	1.92246	1.20564	13.7687	0.000206753	0.0024231	Col7a1		DEG
25.4338	17.3467	14.7626	6.47819	5.58628	5.18612	1.73873	3.56847	92.111	8.19e-22	3.4e-21	Col8a2		1.13279	0.10179	4.3504	2.01019	2.36635	1.09998	12.5672	0.000392573	0.00427832	Col8a2		DEG
291.515	262.333	279.857	197.013	208.258	201.959	0.457289	7.90469	86.742	1.24e-20	4.98e-20	Colgalt1		157.664	119.705	87.733	67.8103	-0.833114	6.7614	8.05811	0.00453003	0.0322863	Colgalt1
267.124	252.593	270.227	184.928	187.48	190.59	0.488538	7.81331	122.418	1.87e-28	8.98e-28	Copa		214.509	161.846	192.052	158.269	-0.103037	7.50703	0.107376	0.743152	0.91457	Copa
193.046	195.719	185.447	2.1231	2.24495	2.44346	6.38992	6.54549	6036.64	0	0	Crlf1		0.823847	0.50895	2.08457	2.54624	1.76404	0.74081	11.2319	0.000804027	0.00775688	Crlf1		DEG
59.4844	69.9555	68.7517	0.76214	0.730915	0.99733	6.2956	4.9597	2112.29	0	0	Cthrc1		0	0.40716	5.438	1.60815	4.04978	1.0975	25.7859	3.81e-07	9.49e-06	Cthrc1		DEG
109.796	109.199	136.941	36.9093	33.0478	36.7516	1.73774	6.23663	418.079	6.39e-93	7.02e-92	Cxcl12		1.23577	1.62864	5.7099	3.2163	1.65256	1.67154	12.5344	0.00039952	0.0043454	Cxcl12		DEG
156.842	156.049	162.108	1.14321	1.09637	1.69546	6.89849	6.25812	5664.03	0	0	Dpysl3		71.7777	62.8045	152.898	125.168	1.04744	6.69163	14.1651	0.000167448	0.00200378	Dpysl3		DEG
124.042	159.035	152.336	281.72	256.969	267.783	-0.889307	7.70243	143.29	5.08e-33	2.69e-32	Dst		191.03	161.236	130.331	113.375	-0.531041	7.22144	3.22537	0.0725055	0.265735	Dst
123.069	113.749	119.507	2.3953	2.92366	3.29119	5.36143	5.85586	3774.08	0	0	Edil3		3.70731	3.66444	0.2719	0.402037	-3.44766	1.16969	37.0282	1.16e-09	5.08e-08	Edil3		DEG
322.369	318.425	322.318	21.9387	20.1002	21.8914	3.91266	7.39034	5349.9	0	0	Efemp2		4.8401	5.39487	4.8942	7.23667	0.228913	2.5268	0.385029	0.534924	0.818398	Efemp2
20.6389	14.3608	15.6765	1.90535	2.34937	2.79252	2.83761	3.15574	249.48	3.37e-56	2.49e-55	Emp3		0.411924	1.11969	0.362533	1.0721	-0.174201	-0.106385	0.0558715	0.813144	0.940292	Emp3
60.1098	57.7275	62.4952	5.2261	6.3694	4.43812	3.49247	4.94429	1459.24	2.8093560753825e-319	1.04450072341346e-317	Eno2		0.926828	1.0179	1.54077	2.01019	0.837645	0.643766	2.74532	0.0975393	0.325662	Eno2
6.04573	7.67804	8.1546	20.6322	19.0038	19.5975	-1.43642	3.8347	172.792	1.82e-39	1.08e-38	Fas		1.33875	1.22148	0.5438	1.0721	-0.722211	0.313687	1.59059	0.207242	0.520093	Fas
130.435	121.285	126.748	0.871017	0.469874	0.698131	7.52535	5.91512	4726.82	0	0	Fbln1		27.2899	18.2204	14.8639	11.7931	-0.765736	4.19314	5.65041	0.0174513	0.0926424	Fbln1
6507.64	6163.12	6365.09	77.6838	81.6536	94.3474	6.22881	11.6486	4739.17	0	0	Fbln2		8.54741	6.61636	3.17217	2.54624	-1.38846	2.45103	13.4347	0.000247017	0.0028345	Fbln2		DEG
1406.01	1525.37	1510.36	14.5351	13.6785	17.4533	6.60073	9.53834	6592.02	0	0	Fbn1		4.3252	2.0358	7.70383	7.5047	1.25594	2.47978	9.4941	0.00206134	0.0169495	Fbn1		DEG
12.7864	12.2991	11.318	0.544386	0.417666	0.548532	4.57025	2.51297	506.41	3.83e-112	4.89e-111	Fbn2		1.44173	2.0358	1.6314	1.0721	-0.326355	0.828139	0.437247	0.508454	0.801701	Fbn2
271.363	284.23	290.683	203.872	204.552	204.902	0.464394	7.92315	114.659	9.35e-27	4.34e-26	Fermt2		53.859	44.1769	48.1263	45.0282	-0.0729751	5.58548	0.0737669	0.785929	0.930761	Fermt2
126.196	141.759	139.401	16.2227	17.803	16.3064	3.01602	6.20444	1938.44	0	0	Fgf2		0.926828	1.11969	0.996966	1.0721	0.0078851	0.306789	0.000208695	0.988474	0.995692	Fgf2
1106.92	1145.88	1142.35	1586.5	1569.12	1559.38	-0.473779	10.4015	99.0923	2.41e-23	1.04e-22	Flna		530.352	479.024	858.841	797.374	0.714435	9.38066	3.7945	0.0514213	0.208656	Flna
4420.96	5007.93	5038.98	677.434	662.209	645.871	2.86528	11.4193	1683.1	0	0	Fn1		153.442	143.524	73.5036	70.6245	-1.04256	6.7882	14.4646	0.000142822	0.00173684	Fn1		DEG
2478.33	2621.91	2658.47	25.2051	25.1121	28.5735	6.61815	10.3464	7473.99	0	0	Fstl1		82.8996	90.3896	228.94	248.593	1.46214	7.34742	23.5472	1.22e-06	2.73e-05	Fstl1		DEG
97.913	97.4685	100.245	73.0566	71.5774	70.9601	0.455708	6.40569	93.9941	3.16e-22	1.33e-21	Fuca1		42.0162	57.4096	36.2533	52.6669	-0.164152	5.56268	0.302086	0.582578	0.843321	Fuca1
14.0372	17.2045	14.2705	20.4689	17.9074	18.9991	-0.333996	4.12484	11.2916	0.000778603	0.00136463	Fzd8		8.75338	7.02352	12.0542	10.989	0.548605	3.30892	2.91596	0.087707	0.303621	Fzd8
90.547	99.388	101.651	25.5861	27.5659	28.3242	1.83793	5.91921	806.534	2.05e-177	4.06e-176	Gadd45a		5.76693	5.0895	10.9666	8.44278	0.844605	2.96069	6.03156	0.0140523	0.0787869	Gadd45a
20.6389	22.5365	22.0034	58.086	60.8225	52.5593	-1.39484	5.34663	334.231	1.15e-74	1.05e-73	Gadd45b		17.5068	18.2204	11.5104	12.1951	-0.592992	3.91473	3.95377	0.0467666	0.194387	Gadd45b
216.117	201.762	203.303	23.8985	24.7989	25.9306	3.05584	6.82205	2945.11	0	0	Gas1		1.02981	1.22148	5.1661	2.81426	1.83823	1.48352	14.1221	0.000171321	0.00204534	Gas1		DEG
566.978	687.327	709.731	272.465	286.936	276.909	1.23164	8.86126	283.633	1.21e-63	9.81e-63	Gja1		23.8916	26.3636	126.615	137.095	2.39067	6.29673	71.3009	3.07e-17	4.68e-15	Gja1		DEG
16.3304	17.4178	18.0667	17.8559	20.309	20.7445	-0.186806	4.22467	4.21446	0.0400808	0.0563762	Glipr1		51.3875	94.3594	66.3436	108.684	0.262545	6.32796	0.561068	0.45383	0.766682	Glipr1
745.71	671.971	695.461	44.8574	48.6058	49.2183	3.88762	8.54029	4067.2	0	0	Gpc1		73.5284	55.8828	68.9719	56.0172	-0.0486926	5.99627	0.0310468	0.860136	0.957956	Gpc1
51.0065	48.4143	46.0454	1.03433	0.835331	0.698131	5.8197	4.507	1934.98	0	0	Gpx7		11.019	10.688	12.6887	10.1849	0.0815512	3.50775	0.0660375	0.797196	0.934208	Gpx7
62.4725	68.1782	71.7745	11.541	11.4336	11.968	2.53287	5.23996	1039.89	3.84e-228	9.99e-227	Htra1		13.9024	13.4363	6.16306	4.02037	-1.40257	3.27014	16.7435	4.28e-05	0.000617407	Htra1		DEG
183.109	174.249	178.909	318.683	295.394	302.59	-0.773228	7.92687	277.067	3.27e-62	2.6e-61	Id2		4.22222	6.00562	10.2416	13.6693	1.2157	3.11744	11.7792	0.000598947	0.00611112	Id2
1.66779	1.20858	1.75746	3.15744	2.5582	2.69279	-0.852873	1.24949	13.4729	0.000242031	0.000444693	Igfbp2		490.498	423.549	736.486	829.269	0.776466	9.27639	4.53239	0.0332591	0.151435	Igfbp2
456.001	528.008	516.903	1.52428	2.45379	2.39359	7.86724	7.94911	6184.73	0	0	Igfbp3		60.6557	63.3134	184.167	238.542	1.769	7.09566	33.9338	5.7e-09	2.2e-07	Igfbp3		DEG
548.285	490.328	490.612	8.92793	9.60631	9.72397	5.7556	7.99792	5918.86	0	0	Igfbp4		2.26558	2.54475	10.0603	5.62852	1.71549	2.42451	16.8246	4.1e-05	0.000593637	Igfbp4		DEG
428.204	478.029	456.095	9.20012	9.34527	13.4141	5.40743	7.83602	3803.04	0	0	Itga5		0.823847	0.40716	4.16913	1.87617	2.30505	1.04631	15.2289	9.52e-05	0.001226	Itga5		DEG
341.827	361.579	370.542	144.807	149.681	145.261	1.28808	7.96948	764.555	2.75e-168	5.19e-167	Itgav		40.8834	45.1948	37.8847	34.3072	-0.252555	5.31459	0.866988	0.351791	0.685688	Itgav
1315.33	1398.4	1368.29	1045.44	1048.91	1052.48	0.375362	10.234	59.7251	1.09e-14	3.58e-14	Itgb1		144.276	128.256	212.354	193.916	0.576141	7.40856	3.72166	0.0537111	0.21461	Itgb1
264.136	297.951	282.81	82.9644	83.3243	88.7125	1.7277	7.50196	1010.78	8.15e-222	2.05e-220	Itgb3		8.13549	8.55037	2.53773	1.34012	-2.05233	2.43524	25.9387	3.52e-07	8.88e-06	Itgb3		DEG
540.224	469.498	478.38	182.097	189.307	182.262	1.4264	8.40282	619.76	8.43e-137	1.31e-135	Itgb5		104.217	80.2106	52.7486	46.9043	-0.886849	6.15522	10.4099	0.00125338	0.0112429	Itgb5
181.65	208.942	195.359	187.541	201.576	180.068	0.0418702	7.58923	0.521413	0.470239	0.528358	Jun		10.4011	8.44858	15.0451	12.0611	0.528852	3.54954	2.69815	0.100464	0.331621	Jun
49.8946	42.016	47.381	0.925456	0.939748	1.44613	5.37599	4.45358	1493.15	0	0	Lama1		89.5934	62.2955	16.9484	11.3911	-2.41238	5.50299	55.903	7.61e-14	7.21e-12	Lama1		DEG
13.1338	15.4983	17.1528	1.52428	1.40962	1.6456	3.31348	2.94318	373.479	3.27e-83	3.24e-82	Lama3		6.59078	5.29308	5.7099	5.09247	-0.131795	2.55906	0.139153	0.709124	0.899742	Lama3
856.895	820.129	840.908	93.4166	97.2639	97.14	3.12867	8.85872	4072.49	0	0	Lamc1		67.1435	49.0628	49.0326	34.8432	-0.467218	5.65186	2.49261	0.114382	0.362528	Lamc1
141.345	151.144	149.735	163.751	169.468	160.77	-0.159713	7.28876	12.0401	0.000520678	0.000928074	Lamc2		25.7452	24.8368	27.7338	23.7202	0.0271417	4.68568	0.00934067	0.923007	0.977911	Lamc2
256.839	242.285	252.863	88.3538	88.0752	82.3795	1.5393	7.38059	1033.22	1.08e-226	2.78e-225	Lgals1		37.897	52.8291	24.3804	29.0807	-0.765302	5.18069	6.89015	0.00866719	0.0539954	Lgals1
1667.37	2407.63	2396.33	19.1079	25.7908	28.4239	6.46209	10.0853	1406.56	7.87e-308	2.78e-306	Lox		0.514904	0.20358	1.99393	2.27821	2.52232	0.516317	17.6648	2.63e-05	0.000401222	Lox		DEG
416.53	425.349	419.189	5.33498	5.27303	4.63759	6.37066	7.70588	8906.12	0	0	Loxl1		1.02981	0.50895	2.9909	1.60815	1.59831	0.821414	8.18286	0.00422879	0.0307073	Loxl1		DEG
647.171	802.924	777.218	6.96814	6.57823	6.73198	6.77809	8.53295	4440.32	0	0	Loxl2		2.88347	1.93401	8.24763	7.63871	1.71937	2.42251	20.0868	7.4e-06	0.000131835	Loxl2		DEG
1725.26	2073.78	1983.61	46.6539	50.3809	47.5228	5.3217	9.94196	3958.45	0	0	Lrp1		11.019	8.44858	11.4198	9.51488	0.110173	3.36806	0.114324	0.735274	0.91172	Lrp1
374.835	351.768	333.636	3.70182	4.59432	4.43812	6.37395	7.45117	6187.79	0	0	Lrrc15		18.8455	16.9989	1.26887	2.01019	-3.48003	3.32906	79.7816	4.18e-19	9.19e-17	Lrrc15		DEG
23.349	24.1716	21.9331	5.66161	5.16861	4.88692	2.14452	3.74151	415.441	2.4e-92	2.62e-91	Magee1		2.78048	2.34117	4.0785	3.61834	0.592299	1.7714	2.23917	0.134553	0.403047	Magee1
36.3439	31.2098	33.6729	5.87937	4.22886	4.88692	2.75643	4.18076	616.448	4.43e-136	6.82e-135	Matn2		1.95664	3.0537	8.51953	7.37068	1.66386	2.43826	18.4848	1.71e-05	0.000272932	Matn2		DEG
34.7456	31.2809	30.3689	34.3507	31.3249	34.4079	-0.0538885	5.04066	0.537039	0.463663	0.521817	Mcm7		225.425	251.625	237.459	264.809	0.0741624	7.93678	0.0564284	0.812233	0.940292	Mcm7
34.954	25.8778	32.2669	4.73616	4.4899	5.03652	2.70415	4.06614	427.561	5.52e-95	6.18e-94	Mest		19.1544	18.0168	64.7122	48.5125	1.60838	5.24057	30.6144	3.15e-08	1.01e-06	Mest		DEG
222.858	246.337	248.575	2.06867	1.8795	2.94212	6.69047	6.87225	5418.16	0	0	Mfap5		0.617885	0.610741	0.725066	1.47414	0.768221	0.0522389	1.45541	0.227661	0.546136	Mfap5
1412.76	1293.32	1367.86	42.6798	53.6178	47.0241	4.82841	9.44874	3706.96	0	0	Mmp14		9.98915	6.71815	38.4285	40.2037	2.23282	4.58346	49.4012	2.09e-12	1.53e-10	Mmp14		DEG
3030.93	2716.11	3002.86	36.746	36.2847	43.7329	6.22628	10.525	4744.26	0	0	Mmp2		4.01626	2.23938	9.06333	5.89655	1.26698	2.46828	9.3526	0.00222669	0.0180302	Mmp2		DEG
65.6691	52.751	55.7465	0.816579	0.626498	0.698131	6.33441	4.76718	1661.61	0	0	Msx1		0.514904	0.50895	1.72203	1.34012	1.57705	0.30176	7.33999	0.00674372	0.0442545	Msx1		DEG
18.9711	16.9912	13.9191	66.6328	65.6257	59.4908	-1.9413	5.3882	497.214	3.84e-110	4.82e-109	Myl9		1.02981	0.814321	9.60713	9.64889	3.36641	2.44137	61.6464	4.11e-15	5.02e-13	Myl9		DEG
32.0354	33.1293	27.4163	0.326631	0.57429	0.747998	5.77687	3.83549	1102.77	8.26e-242	2.28e-240	Nid2		293.084	186.276	243.169	179.979	-0.179528	7.81938	0.275937	0.599377	0.849987	Nid2
95.2029	110.905	111.282	104.195	102.485	106.764	0.0177242	6.71744	0.0913285	0.762495	0.799272	Notch2		19.7723	16.1846	19.3955	11.7931	-0.195836	4.09159	0.355335	0.551109	0.825861	Notch2
176.23	214.345	214.48	41.9177	43.2806	42.9849	2.23839	6.90509	949.707	1.54e-208	3.61e-207	Nt5e		11.2249	10.179	29.9996	32.297	1.5392	4.39768	27.8853	1.29e-07	3.61e-06	Nt5e		DEG
174.075	172.898	166.747	14.4807	15.8191	14.4613	3.5201	6.49492	3537.73	0	0	P3h1		48.1951	34.2015	30.0903	25.0603	-0.576466	5.11402	3.81686	0.0507392	0.20654	P3h1
416.947	379.423	407.66	6.58707	5.37744	6.28318	6.04308	7.6427	6626.42	0	0	Pcolce		28.2168	23.5135	17.6735	20.3699	-0.445895	4.50174	2.4037	0.121049	0.377655	Pcolce
6.18471	5.97181	6.67834	0.217754	0.156625	0.199466	4.98475	1.55635	308.085	5.71e-69	4.89e-68	Pcolce2		74.7641	75.4265	52.4767	51.9968	-0.523463	5.99765	4.11873	0.0424108	0.182228	Pcolce2
1109.36	924.067	946.426	13.2286	12.4256	14.3117	6.21859	8.96324	4549.98	0	0	Pdgfrb		3.08943	2.44296	2.53773	2.81426	-0.054216	1.54882	0.0172718	0.895441	0.969581	Pdgfrb
17.9982	20.0482	16.6607	1.90535	2.03612	1.99466	3.19823	3.21598	477.775	6.51e-106	7.93e-105	Pdlim4		50.6666	47.2306	2.35647	1.47414	-4.62782	4.68559	160.23	1.01e-36	1.85e-33	Pdlim4		DEG
31.132	36.8973	30.8609	29.9957	29.2366	29.0223	0.163962	4.96204	4.47279	0.0344387	0.0489888	Pfn2		9.6802	11.6041	31.9936	29.6167	1.53309	4.3855	27.1217	1.91e-07	5.13e-06	Pfn2
25.2948	30.7833	28.9629	26.9471	28.4013	25.8309	0.0669008	4.79505	0.660533	0.416372	0.474749	Plaur		4.3252	5.19129	9.60713	13.6693	1.2791	3.05876	12.9433	0.000321074	0.00356034	Plaur
535.082	574.218	571.173	54.0031	55.6017	53.6065	3.36392	8.24725	4112.53	0	0	Plod1		6.89972	5.80204	8.157	6.96865	0.257578	2.84301	0.578486	0.446907	0.761712	Plod1
115.911	138.347	154.024	45.4018	49.0757	47.7223	1.52119	6.49427	326.946	4.45e-73	3.99e-72	Plod2		35.0135	40.716	46.4043	55.6152	0.42817	5.47929	2.46766	0.116211	0.366969	Plod2
252.6	258.139	263.548	65.9251	67.6618	64.9262	1.96364	7.32103	1828.9	0	0	Plod3		35.3224	26.1601	31.2685	29.0807	-0.0257527	4.93904	0.00827804	0.927506	0.978892	Plod3
1723.17	1670.69	1617.28	1772.25	1804.16	1777.39	-0.0954208	10.7547	3.5122	0.0609186	0.083058	Pmepa1		5.25203	3.76623	10.1509	6.56661	0.901312	2.73755	5.72462	0.0167286	0.0897313	Pmepa1
295.685	291.979	323.583	162.662	171.086	154.337	0.900851	7.85849	276.623	4.09e-62	3.25e-61	Ppib		278.254	379.779	250.964	490.888	0.17259	8.4516	0.192528	0.660821	0.877265	Ppib
75.8843	80.9038	85.1312	45.6195	47.1962	42.4364	0.839272	5.95607	186.721	1.65e-42	1.02e-41	Pvr		33.5718	26.8726	15.9515	14.7414	-0.975136	4.52545	11.1425	0.000843713	0.00808767	Pvr
212.434	203.397	206.818	203.927	202.985	189.592	0.0622075	7.66686	1.84033	0.174912	0.218617	Qsox1		8.13549	7.32889	14.5013	8.30877	0.572316	3.2962	2.57096	0.108842	0.350702	Qsox1
419.935	453.147	442.668	359.022	381.329	362.829	0.254155	8.65424	28.3969	9.88e-08	2.34e-07	Rhob		57.3604	40.6142	26.0118	22.6481	-1.00709	5.20598	11.867	0.000571372	0.0058881	Rhob
120.428	113.607	136.871	151.448	142.528	147.854	-0.252298	7.08645	17.3816	3.06e-05	6.08e-05	Sat1		31.2032	39.9017	17.0391	16.6175	-1.07799	4.72453	13.728	0.000211283	0.00246741	Sat1
884.414	908.071	865.161	219.768	227.993	229.785	1.97158	9.11202	1758.54	0	0	Sdc1		94.6394	110.849	135.225	159.207	0.518365	6.96751	3.21754	0.0728532	0.266713	Sdc1
281.926	282.31	289.207	1077.83	1107.91	1099.61	-1.94467	9.43577	1777.87	0	0	Sdc4		311.723	376.623	179.816	210.668	-0.818086	8.07647	6.33648	0.011828	0.0689668	Sdc4
328.485	614.741	655.25	55.4185	53.6178	54.8033	3.28616	8.18138	307.16	9.08e-69	7.77e-68	Serpine1		9.57722	10.0772	9.42586	9.64889	-0.0439831	3.30624	0.0198456	0.887969	0.967615	Serpine1
369.137	333.355	370.261	204.417	197.243	197.471	0.840513	8.11672	276.554	4.23e-62	3.36e-61	Serpine2		21.626	22.3938	32.1748	31.2249	0.526454	4.75765	3.65096	0.0560369	0.220903	Serpine2
2565.82	2476.67	2498.26	425.492	418.24	413.742	2.5842	10.5149	2521.52	0	0	Serpinh1		53.3441	48.2485	120.995	124.498	1.27259	6.44184	21.6646	3.25e-06	6.36e-05	Serpinh1		DEG
84.6402	79.6241	83.444	63.3665	58.8908	61.2859	0.432905	6.16002	66.8144	2.98e-16	1.04e-15	Sfrp1		48.504	27.9923	20.5738	11.6591	-1.23775	4.77952	11.7046	0.000623442	0.00631412	Sfrp1
52.6743	51.6135	52.3722	32.1732	29.1844	29.122	0.793057	5.34286	157.64	3.71e-36	2.08e-35	Sgcb		4.01626	5.39487	5.80053	5.76253	0.296207	2.44586	0.675632	0.411095	0.735747	Sgcb
369.623	362.361	368.433	158.198	167.902	169.646	1.15004	8.04746	674.194	1.22e-148	2.04e-147	Slc6a8		55.6097	33.9979	40.1506	21.844	-0.526293	5.25478	2.22821	0.13551	0.404738	Slc6a8
207.779	180.576	190.79	3.42963	2.97587	2.94212	5.95279	6.56512	4299.3	0	0	Slit2		21.2141	22.801	2.26583	2.1442	-3.30711	3.63067	82.6498	9.8e-20	2.37e-17	Slit2		DEG
244.817	255.721	257.432	2.44974	1.72287	1.6456	7.02811	6.94983	7319.96	0	0	Slit3		2.26558	2.54475	4.16913	4.55642	0.850518	1.83673	4.74831	0.029327	0.137953	Slit3
107.016	101.876	101.159	151.448	143.416	158.825	-0.549287	7.0014	117.58	2.14e-27	1.01e-26	Sntb1		8.85636	9.16111	11.2385	13.8033	0.468968	3.45145	2.14883	0.142679	0.418488	Sntb1
5989.37	5971.03	6274.26	65.2174	63.2241	76.8443	6.47213	11.5835	4941.01	0	0	Sparc		70.233	54.0505	78.4884	66.4702	0.223003	6.07751	0.661045	0.416191	0.738929	Sparc
13970.3	15060.6	14682.8	2329.05	2198.64	2354.1	2.66722	13.0412	1499.09	0	0	Spp1		566.086	663.162	239.906	224.873	-1.40303	8.72714	16.2471	5.56e-05	0.000779646	Spp1		DEG
147.947	147.091	143.901	25.6406	25.1644	23.2877	2.56764	6.3774	2220.8	0	0	Tagln		13.2845	15.2685	72.1441	91.6645	2.51781	5.59046	73.2608	1.14e-17	1.89e-15	Tagln		DEG
23.6965	21.2568	17.8558	7.73028	10.285	9.6741	1.17931	3.87002	84.693	3.48e-20	1.39e-19	Tgfbi		3.29539	3.66444	2.62837	2.01019	-0.563754	1.64735	1.89542	0.168592	0.461697	Tgfbi
86.7944	82.1835	89.7709	30.3223	34.4052	33.61	1.3946	5.86418	503.378	1.75e-111	2.23e-110	Tgfbr3		9.6802	8.14321	6.16306	4.02037	-0.787115	2.85937	4.812	0.0282622	0.134325	Tgfbr3
179.426	178.088	176.378	561.207	609.061	565.835	-1.70119	8.57263	1202.27	1.96e-263	5.97e-262	Tgm2		19.8753	20.0526	6.97876	9.11285	-1.31972	3.83157	17.4576	2.94e-05	0.000438899	Tgm2		DEG
344.398	422.079	409.487	1284.75	1431.18	1363.35	-1.79451	9.7789	560.199	7.61e-124	1.07e-122	Thbs1		2.1626	2.44296	52.8392	32.163	4.20174	4.4999	116.718	3.31e-27	2.4e-24	Thbs1		DEG
2997.78	2716.75	2806.17	30.1045	27.9836	38.5967	6.45988	10.4837	3410.66	0	0	Thbs2		1.64769	1.93401	2.53773	2.1442	0.395813	1.18972	0.810893	0.367856	0.699623	Thbs2
267.958	201.975	222.846	5.71605	6.3694	5.98398	5.25855	6.84584	2286.02	0	0	Thy1		0.720866	0.50895	2.62837	0.938087	1.56642	0.533265	6.01642	0.0141734	0.0792896	Thy1		DEG
472.401	598.461	589.17	11.7587	12.791	14.6608	5.40081	8.12529	2720.86	0	0	Timp1		12.6667	11.1969	4.6223	4.2884	-1.41434	3.07747	17.496	2.88e-05	0.000430898	Timp1		DEG
2282.23	3442.61	3158.22	182.097	205.439	195.527	3.92924	10.62	919.098	6.92e-202	1.57e-200	Timp3		8.23847	7.2271	26.5556	25.4624	1.74902	4.09076	32.8944	9.73e-09	3.58e-07	Timp3		DEG
7202.13	7658.06	7395.52	145.351	148.95	148.702	5.65058	11.8837	6635.48	0	0	Tnc		0.823847	1.22148	7.8851	6.83463	2.83541	2.12967	42.2242	8.14e-11	4.47e-09	Tnc		DEG
74.564	68.3204	78.8747	205.451	220.684	210.038	-1.52022	7.17941	768.319	4.17e-169	7.9e-168	Tnfaip3		2.98645	2.13759	5.25673	2.94827	0.701344	1.83803	2.61048	0.106159	0.344214	Tnfaip3
183.387	175.031	178.066	260.38	253.888	250.978	-0.512172	7.76677	143.249	5.19e-33	2.74e-32	Tnfrsf12a		13.4905	18.0168	34.2594	36.4514	1.1647	4.68479	15.5314	8.11e-05	0.00107227	Tnfrsf12a
337.588	347.502	330.261	1257.42	1324.89	1250.85	-1.91655	9.66323	1425.5	6.03605639023226e-312	2.17586711006153e-310	Tpm1		132.639	163.17	397.608	525.329	1.6413	8.25168	22.3948	2.22e-06	4.63e-05	Tpm1
40.5828	43.7933	37.8908	140.615	129.32	119.73	-1.67172	6.44563	570.757	3.84e-126	5.49e-125	Tpm2		5.04606	5.0895	19.7581	16.7516	1.8493	3.56675	31.5147	1.98e-08	6.72e-07	Tpm2		DEG
771.074	830.366	826.708	1033.95	1033.1	997.131	-0.335639	9.83923	44.0806	3.15e-11	8.95e-11	Tpm4		172.287	226.788	287.489	343.34	0.660368	8.0092	4.08157	0.0433535	0.184594	Tpm4
747.03	789.416	793.527	34.8951	29.9675	34.8567	4.54594	8.64758	5148.17	0	0	Vcan		59.523	45.093	35.9814	26.5345	-0.738913	5.39379	6.34358	0.0117807	0.0687644	Vcan
376.295	490.542	485.831	194.618	220.684	191.637	1.15613	8.34458	169.972	7.5e-39	4.4e-38	Vegfa		8.23847	5.0895	10.1509	6.83463	0.360229	2.96661	0.917653	0.338092	0.673784	Vegfa
33.8422	37.2527	35.4303	1.19765	1.40962	1.59573	4.65043	4.08097	1343.41	4.17e-294	1.41e-292	Vegfc		7.10568	4.98771	8.79143	7.5047	0.435104	2.87025	1.53712	0.215047	0.531027	Vegfc
1227.14	1334.34	1261.29	85.4686	96.2197	88.6627	3.82144	9.40597	3683.79	0	0	Vim		211.729	186.988	147.823	125.838	-0.542506	7.39523	3.2444	0.071668	0.263722	Vim
153.02	196.288	190.016	27.8725	32.3691	30.6679	2.56769	6.67989	848.68	1.41e-186	2.96e-185	Wnt5a		2.1626	2.13759	5.34736	3.88636	1.11303	1.84932	7.52772	0.00607569	0.0409469	Wnt5a		DEG

## Sheet: STable 8 (Fig4A - Wnt)
Comparison of Wnt signaling DEG in RNAseq and ChIP seq data from Primed/Naïve mouse pluripotent stem cells and EL/PT cells. Diagram on Figure 4A.
EL1	EL2	EL3	PT1	PT2	PT3	logFC_ELvsPT	logCPM	LR	PValue	FDR		Naive_1	Naive_2	Primed_1	Primed_2	logFC_PrimedvsNaive	logCPM	LR	PValue	FDR	mgi_symbol		Label
116.537	124.057	114.797	172.951	164.821	179.22	-0.540962	7.19211	117.98	1.75e-27	8.25e-27		30.3794	21.9867	28.187	16.6175	-0.218138	4.61825	0.428863	0.512547	0.804339	Ago1
180.052	214.416	201.897	121.235	119.609	126.262	0.699684	7.31972	139.191	4e-32	2.08e-31		36.3523	37.4588	26.7368	26.1324	-0.480826	4.99543	3.25279	0.0713018	0.262844	Ago2
29.5337	37.8926	32.6184	19.2168	20.8833	20.6447	0.718532	4.72166	60.0685	9.16e-15	3.02e-14		10.2981	6.92173	8.7008	7.10266	-0.116684	3.08502	0.111773	0.738134	0.912789	Ago3
11.0491	10.5929	9.27937	17.0937	20.4134	19.049	-0.87135	3.92014	66.2015	4.07e-16	1.41e-15		0.720866	1.22148	0.8157	0.402037	-0.598751	0.0269574	0.87395	0.349864	0.684391	Ago4
273.517	253.873	248.996	218.843	216.194	217.667	0.250427	7.8945	29.0518	7.05e-08	1.68e-07		21.626	18.8312	20.6644	20.3699	0.0207775	4.36343	0.00535058	0.941689	0.982595	Akt1
70.1861	61.3532	59.6832	49.5935	52.5214	50.4649	0.325802	5.83511	24.7548	6.51e-07	1.46e-06		35.4254	28.2976	20.755	15.8135	-0.795603	4.66274	6.93583	0.00844859	0.0528936	Akt2
27.31	30.2856	28.1896	41.21	40.879	42.0375	-0.533488	5.15184	66.8968	2.86e-16	9.98e-16		15.7561	13.2327	25.7399	17.9577	0.597278	4.20221	3.67596	0.0552023	0.21824	Amer1
111.672	90.7146	90.4739	71.5867	76.0151	76.6947	0.384735	6.4242	27.303	1.74e-07	4.04e-07		57.1544	38.2731	52.2954	24.5243	-0.30812	5.43809	0.729809	0.392945	0.720079	Ap2a1
123.903	116.592	118.874	71.5323	75.9107	77.0438	0.678312	6.59424	186.671	1.69e-42	1.05e-41		129.138	94.2576	128.881	96.891	0.0161847	6.81421	0.00288039	0.957199	0.987152	Ap2a2
212.018	214.985	212.652	227.444	228.515	228.538	-0.0977899	7.78758	5.90171	0.0151262	0.0227277		169.404	134.465	158.427	119.003	-0.130585	7.18558	0.182109	0.669567	0.880995	Ap2b1
10.5627	8.67334	9.34967	7.89359	6.94369	7.38024	0.364858	3.08102	8.53947	0.00347526	0.00566524		9.1653	9.05932	9.60713	8.17476	-0.029871	3.20592	0.00861521	0.926048	0.978197	Ap2m1
68.1708	57.3009	59.0505	51.8255	53.9833	54.9529	0.198802	5.84483	8.81275	0.00299132	0.00491012		63.6422	53.9487	38.066	41.6779	-0.561157	5.63095	4.36137	0.0367628	0.163503	Ap2s1
152.95	162.519	156.414	200.933	186.592	207.844	-0.335535	7.47944	44.117	3.09e-11	8.79e-11		63.1273	61.9902	51.2984	49.8526	-0.306424	5.8276	1.39771	0.237107	0.558436	Apc
6.94912	5.26088	4.28819	8.54686	7.04811	8.02851	-0.51587	2.79712	9.73074	0.00181211	0.00304967		11.019	11.4005	14.3201	11.7931	0.224696	3.6273	0.51882	0.471345	0.780552	Arrb2
39.7489	37.1105	41.1948	48.777	52.417	53.0081	-0.385799	5.51962	36.9269	1.23e-09	3.23e-09		438.699	551.193	325.827	476.012	-0.304181	8.80773	0.694148	0.404757	0.729634	Ash2l
100.901	94.4826	98.2067	105.393	94.1836	106.814	-0.0615371	6.64671	1.2041	0.272504	0.325529		88.5636	87.2341	94.3493	98.4991	0.133326	6.52922	0.255001	0.613576	0.857403	Axin1
28.5609	30.57	29.6659	6.96814	8.3011	6.28318	2.04293	4.12375	422.275	7.8e-94	8.63e-93		26.2601	16.3882	14.0482	7.63871	-0.962174	4.03225	6.8484	0.00887208	0.0549189	Axin2
86.5165	92.3498	79.3667	148.4	144.251	149.699	-0.776632	6.88076	211.011	8.27e-48	5.49e-47		1.85366	1.83222	1.72203	2.54624	0.181525	1.12126	0.158044	0.690964	0.892873	Bcl9
276.019	288.78	260.877	351.129	347.184	348.467	-0.342328	8.28861	53.6442	2.4e-13	7.49e-13		2.1626	0.916111	1.0876	0.938087	-0.58417	0.580429	1.03088	0.309951	0.641644	Bcl9l
16.1219	14.4319	14.622	13.9363	15.7147	14.4114	0.0360322	3.9048	0.141848	0.70645	0.749052		28.1138	27.4833	22.3864	27.2045	-0.168018	4.72754	0.354489	0.551583	0.826196	Btrc
516.528	521.538	511.42	265.878	275.294	277.956	0.91947	8.62041	468.371	7.25e-104	8.72e-103		542.915	619.393	652.107	827.795	0.348424	9.36789	0.879709	0.348282	0.683088	Calm1
46.976	57.7986	56.9416	24.4974	26.3129	25.1327	1.08974	5.27685	174.203	8.94e-40	5.32e-39		0.205962	0.20358	4.6223	2.1442	3.99126	1.02724	33.3342	7.76e-09	2.91e-07	Cav1		DEG
12.022	11.1616	13.7082	13.3919	13.5219	14.4613	-0.166054	3.72784	2.5976	0.107026	0.139744		26.4661	33.4889	30.9966	45.4302	0.34632	5.09794	1.35027	0.245232	0.568584	Cby1
21.2643	20.7592	19.4726	23.8441	22.6584	23.2378	-0.181027	4.46666	5.43968	0.0196843	0.0291199		65.0839	53.847	58.1866	52.6669	-0.100578	5.84976	0.144109	0.70423	0.898295	Ccdc88c
53.6472	67.1829	59.6129	52.3155	55.6539	59.5406	0.106343	5.85816	1.90187	0.16787	0.210529		35.5284	54.0505	49.3951	53.739	0.202505	5.59611	0.48635	0.48556	0.790211	Cdc73
87.3504	90.5725	86.7481	101.8	98.8823	99.7829	-0.182926	6.56264	15.5686	7.96e-05	0.000152825		35.9403	26.3636	34.35	35.3793	0.162138	5.05349	0.333662	0.563511	0.833282	Chd8
154.826	157.187	143.549	224.069	243.551	237.115	-0.629578	7.6027	155.796	9.38e-36	5.23e-35		486.894	582.443	348.576	514.34	-0.309635	8.91661	0.713456	0.398299	0.725613	Clta
88.3233	87.0178	83.7252	96.7373	91.2599	97.14	-0.138328	6.50761	7.79518	0.00523857	0.00836537		120.385	128.663	64.0777	75.583	-0.835408	6.6059	9.31566	0.00227204	0.0183164	Cltb
419.518	465.943	455.181	408.834	420.641	428.453	0.0917576	8.75848	3.31774	0.068536	0.0926969		522.937	579.898	402.049	441.973	-0.385915	8.92757	1.23247	0.266926	0.594703	Cltc
72.2708	82.8233	80.2806	73.6554	72.6216	74.6502	0.0910093	6.24908	2.58775	0.107693	0.14059		15.5501	15.6757	15.8608	13.8033	-0.0705778	3.94942	0.0564473	0.812202	0.940292	Crebbp
600.959	650.714	607.729	677.706	705.385	719.624	-0.17749	9.36797	12.3263	0.000446624	0.000801247		769.576	722.71	702.589	586.974	-0.21057	9.44232	0.323919	0.569262	0.835959	Csnk1a1
106.182	103.582	101.651	152.918	147.436	148.702	-0.527798	6.99477	141.802	1.07e-32	5.65e-32		39.4417	29.8245	31.4498	26.6685	-0.250702	5.00363	0.783694	0.376014	0.707381	Csnk1e
213.685	200.909	193.391	163.37	168.11	156.73	0.316746	7.5108	40.8587	1.64e-10	4.5e-10		109.263	105.76	139.847	127.044	0.312027	6.91516	1.22803	0.267791	0.596176	Csnk1g2
71.02	71.5906	77.8202	84.2165	78.8344	80.5843	-0.1441	6.27841	7.10059	0.00770587	0.0120592		265.588	270.66	277.7	208.925	-0.139714	7.99981	0.188779	0.663935	0.878105	Csnk2a1
58.0251	59.647	62.0734	51.2267	50.5897	48.8193	0.255282	5.77907	21.6762	3.23e-06	6.91e-06		44.5907	40.3089	69.7876	57.3573	0.583926	5.7341	4.71211	0.0299508	0.140048	Csnk2a2
41.4862	47.2768	48.5058	58.3037	61.1358	61.3857	-0.39822	5.74251	39.2397	3.75e-10	1.01e-09		18.1246	16.8972	20.2112	16.7516	0.0816032	4.18774	0.0775104	0.7807	0.929202	Csnk2b
203.679	201.193	186.783	222.109	212.696	205.001	-0.112621	7.68305	5.20647	0.022503	0.0330071		63.6422	51.3022	78.9416	69.0164	0.365058	6.04307	1.87313	0.171117	0.465819	Ctbp1
55.037	61.2822	58.5585	69.4636	72.4128	72.6056	-0.2951	6.02979	28.2751	1.05e-07	2.48e-07		120.179	107.49	178.366	179.175	0.65111	7.19464	5.0444	0.0247056	0.121088	Ctbp2
1121.03	1168.48	1177.92	1121.43	1163.93	1136.61	0.0190249	10.1653	0.153916	0.694821	0.738606		1511.24	1390.55	1340.38	1123.69	-0.235872	10.3899	0.352305	0.552811	0.827084	Ctnnb1
58.5115	55.5947	53.9891	93.9065	84.1074	85.92	-0.650199	6.18641	120.027	6.24e-28	2.97e-27		23.0677	19.4419	31.8123	26.2664	0.452604	4.66482	2.40743	0.120761	0.377231	Ctnnbip1
93.6046	93.4873	95.6759	90.7491	88.3363	88.9619	0.0772953	6.52083	2.85175	0.0912744	0.120743		136.141	167.241	194.59	269.097	0.611508	7.58428	3.71106	0.0540531	0.215586	Cul1
115.425	123.702	120.562	129.618	122.063	129.803	-0.0850149	6.95134	3.20437	0.073442	0.0987364		242.005	227.297	229.212	231.707	-0.0260165	7.86273	0.00725204	0.932135	0.980436	Cul3
60.9437	68.6758	66.5725	174.149	169.572	173.236	-1.39797	6.91433	775.969	9.06e-171	1.73e-169		42.943	47.027	35.347	41.4098	-0.230917	5.38833	0.727403	0.393726	0.720847	Daam1
55.8709	51.969	54.2703	2.66749	1.67066	1.89493	4.70307	4.70402	1895.87	0	0		2.57452	1.83222	6.97876	7.23667	1.68313	2.27183	18.8312	1.43e-05	0.000233232	Dact1		DEG
157.953	137.423	141.51	220.694	218.074	203.056	-0.554543	7.49704	96.7828	7.74e-23	3.29e-22		22.3469	21.2741	27.9151	29.8848	0.404874	4.6749	2.06912	0.150308	0.431645	Dvl1
50.1726	54.2439	53.5673	66.034	63.3285	66.123	-0.307499	5.8912	31.2107	2.31e-08	5.68e-08		78.9863	70.2352	66.1623	53.471	-0.317166	6.07589	1.395	0.237562	0.558823	Dvl2
79.3589	73.5101	76.4142	75.8329	71.1598	73.0544	0.059789	6.22763	1.29695	0.254771	0.306353		3.81029	3.15549	1.54077	1.47414	-1.19694	1.44554	7.54535	0.00601652	0.0406479	Dvl3
116.676	123.915	129.63	138.165	137.203	141.222	-0.170453	7.03868	12.6326	0.000379072	0.000684576		24.3035	24.8368	21.0269	25.0603	-0.0955086	4.5851	0.111897	0.737995	0.912706	Ep300
4.16947	2.27498	4.28819	5.11723	3.75899	3.88959	-0.246149	2.02675	1.2074	0.271847	0.324861		3.50135	1.62864	3.62533	2.41222	0.253903	1.59609	0.289099	0.590798	0.84691	Frat1
3.1271	4.0523	3.44462	5.00835	4.28107	5.03652	-0.431744	2.12354	6.28172	0.012199	0.0185956		7.62059	6.41278	10.2416	8.04075	0.38873	3.05367	1.32806	0.249151	0.573876	Frat2
661.139	621.708	628.256	110.619	116.32	120.128	2.46066	8.54487	2351.79	0	0		1.64769	1.42506	4.0785	2.01019	1.01407	1.34232	4.38618	0.0362315	0.161532	Fzd1		DEG
65.1827	71.093	69.8765	29.5057	31.4293	33.7098	1.12137	5.62002	299.324	4.62e-67	3.89e-66		25.0244	19.6455	62.0838	51.1927	1.34348	5.31048	21.669	3.24e-06	6.36e-05	Fzd2		DEG
35.51	38.5324	33.1808	59.6647	64.8426	67.3697	-0.840358	5.6665	146.893	8.28e-34	4.44e-33		17.1978	13.4363	29.5465	27.4725	0.896906	4.46629	9.40558	0.00216327	0.0176097	Fzd3
60.9437	53.8174	58.1367	119.493	124.151	125.315	-1.09336	6.51862	416.671	1.29e-92	1.42e-91		183.821	140.165	97.4308	72.5007	-0.929655	6.95123	9.16542	0.00246631	0.0196139	Fzd5
86.6555	90.3592	83.9361	132.612	135.01	134.34	-0.623428	6.79931	184.302	5.57e-42	3.42e-41		9.57722	5.59845	15.0451	16.2155	1.04041	3.55826	8.98177	0.00272686	0.0214274	Fzd6
144.472	163.798	146.22	113.014	106.139	112.748	0.453321	7.02886	69.2561	8.65e-17	3.08e-16		47.3712	33.4889	191.599	144.867	2.05731	6.70776	44.4569	2.6e-11	1.55e-09	Fzd7
14.0372	17.2045	14.2705	20.4689	17.9074	18.9991	-0.333996	4.12484	11.2916	0.000778603	0.00136463		8.75338	7.02352	12.0542	10.989	0.548605	3.30892	2.91596	0.087707	0.303621	Fzd8
363.647	348.782	356.061	440.571	434.007	443.064	-0.302357	8.63758	51.9003	5.84e-13	1.79e-12		70.8509	52.1165	73.3223	53.873	0.0506917	5.97232	0.0309689	0.86031	0.957956	Gnb1
296.936	268.234	274.374	299.902	292.784	304.585	-0.0958892	8.17861	3.9273	0.0475081	0.0659726		109.778	112.58	78.9416	73.4388	-0.544695	6.55338	4.17623	0.0409948	0.177486	Gnb2
30.4371	28.8638	31.0015	2.28642	3.65457	2.69279	3.38119	3.93072	823.95	3.35e-181	6.81e-180		26.0542	33.0818	26.193	23.8542	-0.239239	4.78263	0.707725	0.4002	0.727072	Gnb4
17.9287	20.5459	24.4638	19.2713	20.2568	22.041	0.0305194	4.38267	0.0822111	0.774323	0.80993		4.63414	4.17339	4.98483	5.3605	0.228107	2.31832	0.406172	0.523919	0.812123	Gnb5
2.57117	3.27028	4.1476	0.979894	1.35741	1.24666	1.46916	1.16004	32.6993	1.08e-08	2.7e-08		7.10568	5.39487	4.0785	4.55642	-0.537887	2.45894	2.18421	0.139433	0.41321	Gng10
194.367	189.889	201.967	3.21188	3.44574	4.78719	5.6679	6.58829	5353.15	0	0		1.02981	0.814321	1.9033	1.20611	0.781347	0.548483	2.16067	0.141583	0.416682	Gng11
354.474	340.962	365.2	352.871	351.935	357.443	-0.0021938	8.46737	0.00253562	0.95984	0.967365		12.6667	9.2629	6.88813	6.03056	-0.756658	3.1619	4.9364	0.0262967	0.127334	Gng12
19.666	20.1193	21.3004	2.06867	2.45379	2.49333	3.11467	3.38772	596.872	8.02e-132	1.2e-130		30.7913	31.4531	75.4069	84.4278	1.35952	5.79874	25.2747	4.97e-07	1.21e-05	Gng2		DEG
0.764403	1.06639	0.702983	1.08877	0.678707	1.496	-0.368105	0.145836	0.958299	0.327616	0.38368		1.13279	0.814321	1.72203	0.938087	0.49213	0.466546	0.79441	0.37277	0.704319	Gng3
20.2914	19.906	19.5429	16.8215	21.8752	17.553	0.0866149	4.27806	0.702795	0.401846	0.460446		17.7127	15.3703	17.2203	14.3393	-0.0636944	4.03482	0.0458205	0.830502	0.94634	Gng5
29.8812	24.2427	25.0965	43.7686	43.124	46.2761	-0.748928	5.17608	93.6458	3.77e-22	1.58e-21		0.926828	0.40716	0.634433	0.268025	-0.472347	-0.350004	0.400128	0.527023	0.814585	Gng7
3.26608	3.34137	3.58521	1.25209	0.939748	1.3464	1.5187	1.17321	45.5721	1.47e-11	4.24e-11		2.05962	2.0358	6.43496	7.5047	1.75462	2.22302	20.4749	6.04e-06	0.000109885	Gngt2		DEG
215.214	241.076	243.443	207.411	211.965	216.919	0.13689	7.79829	6.92548	0.00849762	0.0132208		17.1978	15.7775	13.595	8.84482	-0.543687	3.81907	2.80153	0.0941744	0.318254	Gsk3b
63.2369	65.0501	54.3406	73.6009	90.7901	86.8176	-0.460418	6.18911	31.8062	1.7e-08	4.22e-08		126.667	126.118	92.8085	86.572	-0.494481	6.75857	3.31446	0.068673	0.255807	H2afj
15.2881	22.181	18.8399	23.6808	25.5298	23.3375	-0.366151	4.44786	11.2427	0.000799356	0.00139938		138.818	93.2397	133.865	99.7052	0.010231	6.86604	0.00106473	0.973969	0.992256	H2afv
45.6557	44.2198	40.1403	30.4856	30.333	29.6207	0.523967	5.18609	60.2079	8.53e-15	2.82e-14		510.579	371.228	675.581	457.384	0.361718	8.97711	0.920131	0.337441	0.673107	H2afx
11.0491	9.88192	10.3338	12.0854	12.3733	11.7685	-0.211521	3.5183	4.30233	0.0380602	0.0537302		74.6612	45.1948	85.1047	44.0901	0.110852	5.96677	0.0990701	0.752948	0.919656	H2afz
5.07285	3.34137	5.48327	5.06279	5.06419	4.88692	-0.109677	2.31132	0.387049	0.533854	0.589844		29.4525	15.7775	35.5283	16.3495	0.20362	4.61844	0.258548	0.611119	0.856003	H3f3a
433.277	462.175	438.38	554.293	585.202	550.676	-0.34161	8.97909	50.3524	1.28e-12	3.88e-12		294.525	303.131	412.019	443.715	0.517775	8.50592	2.4528	0.117316	0.369076	H3f3b
3.68303	2.41716	3.16342	2.93968	2.50599	2.64293	0.198238	1.5777	0.924972	0.336173	0.392814		6.28183	9.56827	6.2537	6.03056	-0.365938	2.85935	1.04797	0.305975	0.637402	Hdac1
11.9525	12.7256	13.3567	22.0476	21.7708	20.7445	-0.762546	4.14023	75.1981	4.26e-18	1.58e-17		570.72	251.422	660.807	158.805	-0.00413885	8.68226	5.31e-05	0.994187	0.998216	Hist1h2bc
3.54405	2.27498	2.95253	2.93968	3.02808	3.69012	-0.139853	1.6865	0.454873	0.50003	0.556887		950.411	310.46	993.704	215.492	-0.0601954	9.27117	0.00900789	0.924386	0.977981	Hist1h4i
1.5983	1.56405	1.19507	1.6876	3.13249	2.94212	-0.834009	1.15563	8.58827	0.00338335	0.00552356		0.720866	0.814321	1.3595	1.34012	0.80476	0.337277	2.18612	0.13926	0.412941	Hist2h2be
44.9608	41.5894	43.1631	107.026	108.697	107.861	-1.31845	6.26805	652.001	8.2e-144	1.33e-142		41.9132	34.7104	44.0478	41.9459	0.166951	5.35276	0.379738	0.537743	0.81901	Itpr1
33.3558	39.3144	38.172	40.0123	35.606	39.2449	-0.0516571	5.23937	0.468489	0.493683	0.550781		0.823847	0.814321	2.26583	2.68025	1.56687	0.870807	9.99512	0.00156955	0.0135446	Itpr2
181.163	205.601	186.08	270.995	257.908	256.164	-0.45466	7.82694	75.0105	4.68e-18	1.74e-17		14.6233	8.55037	15.2264	11.257	0.198523	3.66093	0.312926	0.57589	0.840028	Itpr3
24.9473	20.9013	23.0578	31.7377	28.5579	29.87	-0.386759	4.75021	22.527	2.07e-06	4.49e-06		32.13	41.0214	39.6974	49.9866	0.291702	5.35337	1.06184	0.302796	0.634428	Kat5
22.1677	23.9583	23.1281	40.5023	39.0517	44.4311	-0.841039	5.04444	125.139	4.75e-29	2.32e-28		71.5717	72.1692	77.9446	76.1191	0.100187	6.22228	0.149926	0.698606	0.89648	Klhl12
95.4808	118.867	108.47	126.189	111.83	119.031	-0.145449	6.82775	4.2974	0.0381706	0.0538729		13.1816	10.4844	12.5074	13.4012	0.128897	3.6545	0.169037	0.680969	0.887974	Kmt2d
443.77	425.563	423.125	71.0423	72.4128	70.7606	2.59292	7.9555	3078.23	0	0		18.2276	15.4721	20.9363	15.8135	0.130329	4.15771	0.18512	0.66701	0.8797	Kremen1
6.46268	6.0429	5.62386	1.08877	1.3052	1.1968	2.32745	1.77244	140.725	1.85e-32	9.67e-32		1.54471	1.62864	10.1509	7.63871	2.48563	2.44467	37.5644	8.84e-10	4.04e-08	Lef1		DEG
24.6694	27.9395	26.8539	27.0015	27.4093	27.277	-0.0403674	4.75519	0.304277	0.581213	0.634977		104.526	112.274	99.2435	116.323	-0.00887389	6.75868	0.00104243	0.974243	0.992256	Leo1
82.764	90.1459	83.0926	182.206	177.247	180.666	-1.07722	7.06761	508.981	1.06e-112	1.35e-111		88.1516	75.2229	183.442	113.106	0.861062	6.84839	7.44681	0.00635492	0.0422584	Lgr4
207.292	229.062	205.271	234.63	231.282	226.494	-0.109888	7.79832	4.90602	0.0267632	0.0387688		26.2601	15.981	23.8366	23.4522	0.163185	4.49748	0.269264	0.603826	0.852966	Lrp5
186.653	221.384	227.696	296.962	282.812	295.958	-0.46215	7.98118	51.6843	6.52e-13	2e-12		40.3685	52.7273	43.6853	46.3683	-0.0485508	5.52336	0.0310236	0.860188	0.957956	Lrp6
120.081	111.829	121.335	123.63	121.384	121.824	-0.0542441	6.90935	1.3606	0.243433	0.294277		106.482	95.4791	85.1047	88.4482	-0.218862	6.55601	0.671029	0.412693	0.736687	Map3k7
67.059	63.1306	68.822	52.5332	57.7423	51.3126	0.300815	5.90447	24.2163	8.61e-07	1.92e-06		46.5474	31.8603	44.2291	41.6779	0.132384	5.36773	0.211902	0.64528	0.871909	Men1
14.5931	17.2045	17.1528	17.0937	16.8632	17.8023	-0.0815208	4.08325	0.79032	0.374003	0.432236		42.6341	21.9867	32.8093	20.1019	-0.283667	4.88986	0.620793	0.430753	0.749434	Mov10
100.137	101.236	96.4492	75.5063	77.8946	76.2459	0.374899	6.45261	62.1163	3.24e-15	1.09e-14		1.02981	0.30537	8.79143	3.61834	3.21189	1.88871	29.1444	6.72e-08	2.02e-06	Myc
25.2948	24.8115	24.5341	27.437	25.5298	25.4319	-0.0698658	4.68201	0.908195	0.340594	0.397475		52.5203	41.3268	47.4012	34.4412	-0.19435	5.46506	0.454687	0.500118	0.798028	Nlk
7.15759	6.114	7.52191	5.06279	6.52602	6.98131	0.160111	2.73309	1.07071	0.300786	0.355472		15.1382	21.0705	15.4077	18.7617	-0.0876158	4.1529	0.0801543	0.777088	0.928354	Pard6a
552.177	520.543	520.277	625.336	666.594	684.069	-0.310891	9.21784	36.4479	1.57e-09	4.11e-09		100.097	66.9779	131.237	73.9749	0.298192	6.54445	0.793176	0.373142	0.704623	Pfn1
6.60166	5.82962	6.25655	15.4061	16.8632	15.309	-1.3465	3.54672	142.747	6.68e-33	3.52e-32		6.89972	6.2092	1.72203	1.60815	-1.9625	2.12286	23.6249	1.17e-06	2.63e-05	Pip5k1b		DEG
14.3152	16.3514	14.7626	11.5954	10.8593	11.0205	0.440489	3.70659	20.1062	7.33e-06	1.53e-05		0.823847	1.22148	1.54077	0.938087	0.313846	0.44128	0.331626	0.564703	0.833562	Plcb1
87.2809	81.828	86.6778	80.5146	82.0713	77.9912	0.0888465	6.37053	3.16653	0.0751622	0.100951		25.1273	22.1902	26.5556	21.174	0.0161584	4.58469	0.00309479	0.955636	0.98663	Plcb3
7.22708	6.46946	8.1546	4.89947	5.58628	5.58505	0.44137	2.66137	9.48335	0.00207345	0.00346453		1.23577	1.11969	2.80963	2.68025	1.21513	1.1111	7.04009	0.0079705	0.0505535	Porcn
216.534	217.26	224.111	226.083	236.138	239.11	-0.0924152	7.82528	4.5262	0.0333796	0.0476212		620.975	751.72	665.248	995.042	0.274318	9.56681	0.485864	0.485778	0.790261	Ppp2ca
80.1233	81.1882	76.9766	105.611	108.906	100.73	-0.403472	6.53683	63.8367	1.35e-15	4.6e-15		53.3441	57.715	44.8635	66.3362	-0.000921576	5.80041	1.03e-05	0.997444	0.999313	Ppp2cb
161.219	142.47	151.422	194.509	194.371	195.776	-0.361201	7.44223	54.479	1.57e-13	4.93e-13		128.005	86.7252	108.216	80.4075	-0.18585	6.65944	0.376987	0.53922	0.819902	Ppp2r1a
59.9014	57.1588	50.7554	41.21	40.4614	40.5913	0.457055	5.58554	47.5019	5.5e-12	1.61e-11		77.5446	64.2295	98.609	84.6959	0.371326	6.34848	1.79464	0.180361	0.480439	Ppp2r1b
47.6709	47.7034	47.8731	41.8088	45.1079	50.0161	0.0637126	5.54772	0.846119	0.357653	0.41522		69.1002	69.9298	97.5214	117.261	0.626601	6.46948	5.41928	0.0199155	0.102617	Ppp2r5a
59.6234	52.2533	51.388	57.8682	65.4691	59.1916	-0.160735	5.85619	5.3573	0.0206357	0.0304568		12.8726	10.688	11.1479	9.64889	-0.175363	3.50044	0.302125	0.582553	0.843321	Ppp2r5b
164.208	168.206	163.022	167.344	162.367	166.255	-0.00155598	7.36941	0.00134816	0.97071	0.976778		237.165	242.159	173.291	175.958	-0.456746	7.69606	2.29079	0.130143	0.394896	Ppp2r5c
55.7319	54.1729	55.9574	66.1429	58.1077	65.3251	-0.192631	5.89632	9.8015	0.0017437	0.0029423		74.0433	62.092	81.2981	76.1191	0.209935	6.2016	0.626898	0.428495	0.748055	Ppp2r5d
76.0233	79.8374	75.3597	89.8781	89.9025	92.9512	-0.238587	6.39909	23.7407	1.1e-06	2.43e-06		14.6233	15.2685	11.5104	14.7414	-0.19354	3.83077	0.395498	0.529423	0.815092	Ppp2r5e
149.892	161.523	149.735	132.721	137.516	140.225	0.167593	7.18159	12.374	0.000435359	0.000782052		23.0677	22.5974	23.5647	19.6998	-0.0745798	4.48952	0.0687784	0.793124	0.932744	Ppp3ca
80.2623	91.781	85.6233	73.2743	68.0795	68.7161	0.294783	6.28021	25.5756	4.25e-07	9.65e-07		29.9674	30.9442	39.2442	32.029	0.229035	5.05628	0.708818	0.399837	0.726903	Ppp3cb
182.414	196.928	196.413	139.091	137.047	139.826	0.468849	7.36427	104.418	1.64e-24	7.24e-24		45.7235	40.0035	45.6792	39.6677	-0.00490967	5.42608	0.000329999	0.985507	0.994701	Ppp3r1
120.984	121.711	122.67	20.0878	24.1724	21.8914	2.46405	6.12381	1646.23	0	0		7.10568	5.0895	13.6856	9.91692	0.958994	3.19737	7.41369	0.00647293	0.0429042	Prickle1
77.9691	93.4162	80.9836	168.977	170.512	178.422	-1.03756	7.02005	305.357	2.24e-68	1.91e-67		3.29539	1.83222	2.35647	2.01019	-0.219143	1.37533	0.230054	0.631484	0.865314	Prkca
25.7812	23.4607	32.8293	8.71017	10.1806	8.27784	1.59472	4.12527	150.586	1.29e-34	7.03e-34		1.02981	0.610741	2.53773	1.34012	1.2675	0.689139	5.17848	0.0228683	0.114154	Prkcb		DEG
26.8236	27.5841	28.752	1.30653	1.46183	1.24666	4.36568	3.7299	1101.38	1.66e-241	4.57e-240		0.411924	1.42506	1.45013	2.01019	0.881794	0.595151	2.22455	0.135832	0.405553	Prkg2
39.7489	41.8738	43.7958	49.3213	53.5656	51.163	-0.297051	5.55415	22.9893	1.63e-06	3.55e-06		139.951	220.172	139.938	204.637	-0.0642886	7.46226	0.0350555	0.851479	0.954346	Psma1
32.1049	32.6317	33.6026	37.2904	36.7546	36.602	-0.169923	5.13308	7.51807	0.0061083	0.0096852		149.116	217.118	123.261	222.997	-0.0817609	7.47794	0.0513248	0.820774	0.943986	Psma2
9.58978	9.02881	9.06848	11.3777	9.60631	11.9181	-0.249187	3.36731	4.36898	0.0365988	0.0517993		29.3496	42.3447	33.8062	46.1003	0.153565	5.25059	0.256642	0.612437	0.856538	Psma3
39.61	39.2433	40.2809	40.5567	42.7063	41.7881	-0.0702113	5.3535	1.38561	0.239148	0.289477		210.802	258.75	237.641	158.671	-0.244051	7.75975	0.539992	0.462436	0.773794	Psma4
2.29321	2.98591	2.46044	1.74203	2.19274	2.74266	0.205358	1.32466	0.785117	0.375581	0.433878		12.6667	6.41278	11.5104	6.56661	-0.0658348	3.25527	0.0261774	0.871468	0.962083	Psma5
89.2961	90.8568	89.7709	123.249	117.312	114.892	-0.396675	6.71185	69.4962	7.66e-17	2.73e-16		132.227	115.939	117.008	111.364	-0.119721	6.89911	0.179607	0.671711	0.882159	Psma6
98.191	100.241	100.175	107.788	105.722	106.964	-0.101945	6.69243	5.30093	0.0213141	0.0313769		297.718	560.863	348.123	495.578	-0.0254002	8.73384	0.00404902	0.949263	0.984523	Psma7
85.1267	93.4162	89.56	79.4803	83.9508	88.7624	0.0874182	6.43867	2.42485	0.119425	0.154627		367.951	511.393	260.208	478.826	-0.25112	8.66089	0.408209	0.52288	0.811707	Psmb1
15.2881	13.1522	12.6537	9.63563	9.91956	10.8709	0.432325	3.56773	15.4285	8.57e-05	0.000163955		23.2737	22.292	109.757	102.251	2.2178	6.01235	66.4059	3.67e-16	5e-14	Psmb10
69.2132	61.0689	69.0329	62.931	66.7221	63.6795	0.0441529	6.03385	0.551835	0.457569	0.515729		67.5555	55.9845	69.9689	56.5532	0.0359199	5.97151	0.0175554	0.894591	0.96938	Psmb2
18.3457	17.2756	17.8558	17.6381	18.2207	18.3509	-0.0199317	4.17661	0.0593865	0.807468	0.838937		130.786	135.89	112.113	104.128	-0.302134	6.91837	1.15433	0.282644	0.612574	Psmb3
128.906	119.01	123.655	131.143	126.657	126.511	-0.0482747	6.97912	1.08306	0.298014	0.352598		515.007	649.421	498.121	567.677	-0.127749	9.12349	0.124785	0.723901	0.906351	Psmb4
7.64403	7.67804	6.32684	7.83915	6.68265	6.18345	0.0669785	2.83774	0.21764	0.640844	0.690765		33.7777	14.6578	35.8908	14.2053	0.0541876	4.64001	0.0143409	0.904678	0.971159	Psmb5
72.6183	65.4055	68.5408	75.724	78.73	73.0544	-0.138818	6.18231	6.14351	0.0131895	0.0200099		431.284	508.95	399.24	467.167	-0.118072	8.81972	0.115226	0.734271	0.911505	Psmb6
38.3591	42.6558	35.1491	47.8515	45.9954	47.3233	-0.281431	5.43513	16.4734	4.93e-05	9.65e-05		131.816	176.097	131.871	152.908	-0.113051	7.21307	0.139697	0.708582	0.899599	Psmb7
33.7727	35.8309	33.462	44.0952	45.7866	41.5388	-0.35019	5.30387	28.3288	1.02e-07	2.42e-07		3.81029	7.53247	36.1627	40.6058	2.75415	4.46906	60.575	7.08e-15	8.4e-13	Psmb8
5.00336	7.67804	6.67834	8.71017	9.29306	6.93145	-0.364197	2.9256	4.78252	0.0287501	0.0414551		0.514904	2.44296	8.7008	12.8652	2.84673	2.64003	31.0774	2.48e-08	8.19e-07	Psmb9
64.2793	58.6517	62.0031	68.2115	75.4931	68.6163	-0.199027	6.05639	11.1556	0.000837788	0.00146388		190.515	225.465	180.542	183.195	-0.193643	7.60841	0.415422	0.51923	0.809724	Psmc1
65.3217	66.1876	68.2596	60.3179	63.1719	59.042	0.130344	5.99303	6.0126	0.0142041	0.0214394		147.366	145.153	117.098	106.138	-0.38956	7.01316	1.88626	0.169625	0.463832	Psmc2
90.0605	84.885	79.5776	90.368	96.2197	92.1533	-0.1311	6.47832	5.79003	0.0161173	0.0241425		319.344	447.266	296.643	490.083	0.0370784	8.60171	0.00962027	0.921866	0.977519	Psmc3
61.2912	58.7939	53.5673	53.5131	53.4612	56.1497	0.0899299	5.81157	2.2177	0.136436	0.17458		200.092	231.878	183.079	254.49	0.0181054	7.76524	0.00315476	0.955209	0.986335	Psmc4
60.0404	64.4813	57.4337	59.1203	57.3768	59.5905	0.0470241	5.90066	0.679415	0.409788	0.46837		108.336	135.89	88.9113	124.632	-0.194819	6.84076	0.421872	0.516004	0.807122	Psmc5
48.9913	57.2299	53.2861	64.7275	57.3246	60.2886	-0.192887	5.83993	8.21359	0.00415778	0.00671579		184.645	336.314	203.744	214.688	-0.316242	7.87692	0.801566	0.370626	0.702886	Psmc6
107.016	102.445	109.876	104.413	107.183	107.562	0.000696675	6.73527	0.000224107	0.988056	0.990266		328.406	354.535	315.857	360.493	-0.0141081	8.40947	0.0018325	0.965855	0.990105	Psmd1
39.471	42.8691	42.0384	55.7451	47.8227	48.8692	-0.292745	5.53961	17.1012	3.54e-05	7.01e-05		30.4823	45.602	33.8969	41.9459	-0.00669876	5.25436	0.000495697	0.982237	0.994695	Psmd10
53.4387	58.4384	54.4812	60.699	59.3607	58.294	-0.100325	5.84968	3.2532	0.0712844	0.0960772		30.5853	31.6567	30.9966	32.565	0.02953	4.98436	0.0122907	0.911724	0.973522	Psmd11
70.5335	69.4578	72.2666	76.7584	76.3806	74.351	-0.0996441	6.20006	4.04665	0.0442591	0.0618598		83.9294	84.8929	92.0834	93.6747	0.13781	6.47327	0.275595	0.599603	0.849987	Psmd12
51.2845	53.6752	53.2861	54.1664	59.7262	55.0526	-0.0946122	5.77475	2.60497	0.106529	0.139166		174.862	252.134	174.197	206.647	-0.165306	7.65934	0.265086	0.606647	0.853876	Psmd13
44.0574	47.4901	44.7097	39.7946	43.4372	40.5913	0.137643	5.4375	4.84593	0.0277115	0.0400307		201.534	218.238	188.336	171.402	-0.222456	7.60812	0.555303	0.456159	0.768367	Psmd14
138.843	137.849	137.152	135.715	136.629	136.185	0.0186402	7.0997	0.194845	0.658915	0.706369		187.425	163.475	171.297	125.704	-0.239864	7.34187	0.602841	0.437496	0.754086	Psmd2
131.06	130.029	118.874	141.431	144.669	147.804	-0.191697	7.08772	15.3745	8.82e-05	0.000168555		197.517	181.085	184.167	228.625	0.124364	7.62956	0.166125	0.683579	0.889322	Psmd3
52.6743	53.1065	52.2316	64.4008	66.0956	64.7267	-0.305118	5.89027	34.882	3.5e-09	9.01e-09		216.775	258.852	209.544	291.075	0.0734771	7.9321	0.0504066	0.822357	0.944438	Psmd4
50.3116	52.0401	45.9048	43.2787	42.0276	46.4756	0.169216	5.54338	6.577	0.0103305	0.0159216		223.983	273.51	177.279	253.686	-0.207604	7.85981	0.401906	0.526107	0.813978	Psmd5
77.2047	73.4391	76.4142	68.4293	68.5494	71.1595	0.125277	6.18027	6.13488	0.0132541	0.0201005		432.417	538.062	418.998	444.385	-0.168732	8.84133	0.234425	0.628262	0.863816	Psmd6
142.387	145.314	143.76	135.389	139.657	134.39	0.0756018	7.131	3.05467	0.0805052	0.107535		52.4173	50.895	63.5339	55.7492	0.208347	5.80394	0.615867	0.432587	0.750176	Psmd7
129.045	134.792	133.215	207.411	211.6	212.481	-0.669595	7.42999	242.976	8.83e-55	6.42e-54		156.943	170.6	158.79	229.831	0.246046	7.48539	0.601186	0.438126	0.75454	Psmd8
31.2015	29.5036	35.0788	26.7838	26.7828	27.1773	0.246364	4.87535	10.4757	0.00120956	0.00207973		33.0569	38.5784	38.6098	43.6881	0.198767	5.27323	0.523298	0.469438	0.778836	Psmd9
23.21	24.3849	23.8311	33.8064	33.7265	33.8095	-0.504781	4.8727	55.8811	7.7e-14	2.44e-13		27.2899	21.8849	35.7095	41.2758	0.64487	4.98681	5.37381	0.0204413	0.104606	Psme1
5.76777	4.62104	5.90505	6.80482	6.94369	7.23064	-0.364141	2.68542	6.66497	0.00983266	0.0151953		13.4905	8.85574	12.8699	12.7312	0.196509	3.60781	0.35151	0.553259	0.827084	Psme2
122.374	121.214	118.734	116.063	117.312	117.785	0.0450541	6.89455	1.09088	0.296276	0.350893		46.7533	32.6746	57.824	40.6058	0.311979	5.48241	1.0655	0.301965	0.633938	Psme3
89.6436	97.9661	98.2067	112.579	110.159	116.339	-0.24688	6.70841	23.8921	1.02e-06	2.25e-06		504.606	460.295	483.529	431.386	-0.0766723	8.87707	0.0493542	0.824191	0.944898	Psme4
40.6523	37.3238	40.1403	40.6656	46.6219	43.6831	-0.149319	5.38483	4.71663	0.0298723	0.0429537		20.0813	15.5739	22.0239	18.7617	0.196845	4.27288	0.439277	0.507472	0.8012	Psmf1
103.264	102.516	98.277	101.855	101.075	99.2842	0.00898709	6.66036	0.0386925	0.844059	0.870572		67.1435	44.6858	62.9901	30.4208	-0.255684	5.6893	0.520486	0.470634	0.780271	Pygo2
264.692	255.508	261.65	225.049	222.094	230.683	0.205913	7.92546	24.2281	8.56e-07	1.91e-06		28.3197	18.0168	39.6974	16.4835	0.283977	4.69636	0.515157	0.472915	0.781379	Rac1
5.35082	4.62104	4.85058	3.70182	5.69069	4.08905	0.136249	2.26648	0.542844	0.461256	0.519462		13.5935	20.6634	14.4107	13.2672	-0.305747	3.97381	0.920765	0.337274	0.672997	Rac3
37.6642	32.134	34.5867	32.8265	32.6823	32.8122	0.0867985	5.08051	1.54274	0.21421	0.262394		126.872	109.628	84.289	74.6449	-0.572657	6.63082	4.40086	0.0359208	0.160524	Rbbp5
40.0269	36.5418	35.8521	35.8206	38.112	35.3554	0.0411879	5.21089	0.37266	0.541558	0.597519		58.5961	80.007	50.4827	66.2021	-0.25019	6.00032	0.772081	0.379574	0.710349	Rbx1
322.161	314.871	326.535	248.458	243.656	245.044	0.386475	8.14471	88.4658	5.17e-21	2.1e-20		271.355	325.118	187.883	217.502	-0.557369	7.96971	3.0511	0.0806824	0.286157	Rhoa
95.3419	97.8239	98.98	120.364	111.934	110.853	-0.231706	6.73167	22.0572	2.65e-06	5.7e-06		43.6639	53.0326	52.1141	48.6465	0.0599448	5.63172	0.0497626	0.823477	0.944833	Rnf146
22.3067	20.9013	22.8469	61.9511	56.5937	62.1835	-1.45159	5.40813	430.793	1.09e-95	1.24e-94		1.44173	0.712531	0.5438	0.53605	-0.976098	0.0349891	2.23513	0.134905	0.403662	Rnf43
64.8352	66.1876	71.0013	64.8908	72.8826	70.7606	-0.0463289	6.10031	0.598176	0.439275	0.497477		2.57452	1.62864	6.61623	3.75235	1.31729	1.95722	8.59989	0.00336183	0.0253878	Ror1
81.7911	76.6382	71.6339	1.14321	1.14858	0.947464	6.14423	5.18587	2629.1	0	0		11.9458	10.9933	8.24763	4.42241	-0.833819	3.19746	5.21573	0.0223835	0.112553	Ror2
10.9796	11.7303	9.91206	6.85926	7.93565	7.23064	0.56532	3.17388	21.8575	2.94e-06	6.29e-06		63.3333	58.1221	68.0656	62.4498	0.104422	5.98206	0.160667	0.688543	0.891949	Rps27a
6.67115	6.82493	6.60804	1.6876	1.20079	1.6456	2.14332	1.95694	138.663	5.22e-32	2.71e-31		0.205962	0.30537	1.99393	1.0721	2.56314	0.163963	13.1685	0.000284691	0.00321091	Rspo1		DEG
5.90675	5.33197	6.04565	0.163316	0.104416	0.199466	5.13882	1.43074	288.756	9.28e-65	7.64e-64		4.01626	4.27518	2.35647	3.35031	-0.559977	1.88786	1.98405	0.158964	0.446962	Rspo3
8.75589	9.59755	9.06848	7.56696	8.09227	6.83171	0.286813	3.05935	5.46222	0.019432	0.0287748		68.8942	62.2955	71.6003	101.715	0.400065	6.25316	1.98132	0.159251	0.447119	Ruvbl1
135.508	138.845	145.166	100.657	101.858	97.0901	0.485852	6.89901	108.539	2.05e-25	9.23e-25		76.9267	75.1211	71.419	78.1292	-0.0244663	6.24031	0.00860887	0.926075	0.978197	Ryk
64.3488	54.0307	58.1367	91.8379	90.7901	92.7517	-0.641211	6.25097	116.279	4.13e-27	1.93e-26		40.6775	30.3334	48.6701	38.0595	0.290645	5.30978	0.997679	0.317873	0.649957	Scrib
85.8216	87.6576	89.3491	78.3371	82.4367	77.4926	0.141582	6.38311	8.26525	0.00404111	0.00653944		154.986	135.89	147.642	143.125	-0.000448497	7.18611	2.4e-06	0.998763	0.999363	Sem1
84.6402	79.6241	83.444	63.3665	58.8908	61.2859	0.432905	6.16002	66.8144	2.98e-16	1.04e-15		48.504	27.9923	20.5738	11.6591	-1.23775	4.77952	11.7046	0.000623442	0.00631412	Sfrp1
29.1168	18.6975	24.042	0.489947	0.365457	0.448799	5.76172	3.46366	585.874	1.98e-129	2.92e-128		5.04606	1.83222	11.6011	9.64889	1.62816	2.85369	14.079	0.000175288	0.00208548	Sfrp2		DEG
135.438	144.034	136.66	140.887	137.36	141.771	-0.013557	7.12406	0.0908123	0.763147	0.799905		118.737	94.054	141.479	98.9012	0.176931	6.82705	0.343553	0.557786	0.830279	Smarca4
176.021	168.633	169.841	157.436	149.315	151.744	0.166498	7.34034	14.1946	0.000164844	0.000307785		20.8021	18.3222	25.3773	20.9059	0.245646	4.43137	0.733934	0.391611	0.719425	Smurf1
142.804	153.703	146.08	140.343	144.826	147.804	0.0313027	7.18991	0.454232	0.500332	0.557186		42.4281	36.5426	53.2924	47.4404	0.352135	5.49628	1.72404	0.189174	0.49409	Smurf2
181.58	187.117	177.081	150.523	147.801	148.104	0.289919	7.36709	45.1478	1.83e-11	5.25e-11		97.4199	61.0741	81.2074	49.7186	-0.273346	6.18237	0.701238	0.402368	0.727865	Snx3
26.9626	28.4372	27.7678	52.6421	51.3729	49.8166	-0.886737	5.33546	198.072	5.5e-45	3.5e-44		6.59078	4.68234	7.3413	4.55642	0.0947724	2.59434	0.0609597	0.804986	0.938021	Sox13
3.961	3.41246	3.37432	0.0544386	0	0	7.17504	0.739013	208.725	2.61e-47	1.72e-46		1.54471	1.0179	9.2446	6.70062	2.6359	2.27333	37.0974	1.12e-09	4.94e-08	Sox17		DEG
498.391	572.441	557.817	964.216	1021.98	1006.61	-0.877867	9.59188	218.724	1.72e-49	1.17e-48		22.2439	20.9688	105.135	97.561	2.2295	5.94566	66.3217	3.83e-16	5.17e-14	Sox4
235.019	234.038	215.324	36.9093	39.3128	35.6546	2.61303	7.02304	2167.59	0	0		23.0677	33.2854	21.9333	23.0501	-0.325839	4.67535	1.16815	0.279782	0.609337	Tcf4
39.61	38.7457	40.8433	14.0996	11.0159	12.8656	1.65068	4.65504	374.029	2.48e-83	2.46e-82		8.23847	8.34679	11.2385	9.78291	0.345776	3.26559	1.19343	0.274638	0.604042	Tcf7
26.9626	28.8638	24.9559	13.8818	11.5902	13.2645	1.06025	4.27725	128.394	9.21e-30	4.56e-29		2.47154	1.62864	1.45013	1.47414	-0.48444	0.978845	1.04376	0.306949	0.638705	Tcf7l1
25.6422	25.8778	25.6589	22.7553	27.3049	24.8834	0.041573	4.66964	0.257892	0.611572	0.663944		1.13279	1.52685	1.81267	1.34012	0.267035	0.743821	0.294337	0.587455	0.84505	Tcf7l2
6.67115	7.89132	6.53774	9.90782	9.50189	9.77384	-0.468024	3.11353	14.8161	0.000118522	0.0002242		16.6829	12.7238	15.1358	10.855	-0.170214	3.8171	0.274976	0.600013	0.850496	Tert
54.6895	61.14	51.8801	48.8858	47.405	51.2129	0.184594	5.71339	7.70075	0.00551979	0.00880088		61.1707	50.0807	59.0929	49.3166	-0.0358509	5.7852	0.0170624	0.896073	0.969947	Tle1
156.077	154.343	142.284	172.57	176.881	182.761	-0.233628	7.36282	23.1705	1.48e-06	3.24e-06		62.2005	53.4398	51.2984	38.5956	-0.360587	5.69025	1.6938	0.193101	0.499359	Tle3
3.47456	3.41246	4.56939	15.515	17.6464	16.6554	-2.11888	3.46489	262.833	4.14e-59	3.19e-58		52.8292	47.6378	103.684	79.7374	0.869559	6.15362	10.0596	0.00151558	0.013151	Tle4
105.001	111.403	117.75	73.0021	74.0834	76.8942	0.576623	6.53062	117.203	2.59e-27	1.22e-26		145.306	227.908	131.328	159.475	-0.36036	7.37686	1.21259	0.270819	0.600139	Tmed5
148.572	168.846	163.022	126.243	128.014	135.088	0.302854	7.17675	32.1409	1.43e-08	3.57e-08		75.691	51.8112	61.7213	38.5956	-0.342798	5.8385	1.19901	0.273519	0.602824	Tnks
247.666	277.334	264.603	224.831	228.933	236.018	0.194753	7.94488	15.4999	8.25e-05	0.000158241		436.227	393.215	489.964	420.799	0.135024	8.76578	0.154731	0.694054	0.894535	Tnks2
101.596	110.763	115.43	108.115	112.717	108.609	-0.00742087	6.77694	0.0201466	0.887128	0.907457		28.4227	22.5974	38.2473	29.3487	0.408846	4.90125	2.00714	0.15656	0.442879	Tnrc6a
72.8962	91.4967	87.9431	94.5054	90.2158	98.0874	-0.164859	6.48388	5.29324	0.0214084	0.0315018		30.8943	26.0583	42.507	34.3072	0.43388	5.07313	2.44737	0.117722	0.369905	Tnrc6b
81.7911	77.7757	80.7727	65.9795	64.7382	65.6243	0.291854	6.18133	34.4648	4.34e-09	1.11e-08		61.6856	56.2899	79.9386	71.1606	0.357688	6.07641	1.8555	0.173146	0.469223	Tnrc6c
96.1063	106.213	114.375	109.639	104.312	108.31	-0.025226	6.73657	0.185079	0.667044	0.71347		24.2005	21.0705	20.755	16.2155	-0.287035	4.37871	0.963781	0.326236	0.660132	Trrap
1.87626	1.56405	1.96835	1.4154	2.19274	2.64293	-0.213997	1.0652	0.62362	0.429705	0.487905		27.4959	6.81994	37.1597	11.5251	0.508715	4.39718	0.7814	0.376713	0.707895	Uba52
15.0796	12.7256	12.7943	10.4522	10.3894	9.87357	0.403608	3.56404	14.3008	0.000155801	0.000291524		170.433	215.795	151.901	167.65	-0.273614	7.4648	0.800873	0.370833	0.702886	Ubb
193.602	187.472	200.28	206.54	217.604	214.426	-0.135515	7.66987	9.11618	0.00253358	0.00419489		21.2141	9.77185	19.5768	6.70062	-0.226962	3.86991	0.226709	0.633975	0.86572	Ubc
124.737	133.513	130.403	134.137	130.468	143.965	-0.0725397	7.0563	2.06451	0.150764	0.191114		121.929	143.829	121.358	120.879	-0.133684	6.99113	0.220651	0.638544	0.868576	Usp34
107.155	114.886	110.228	108.224	106.766	112.748	0.0193915	6.78266	0.166984	0.682806	0.727981		67.3495	57.1042	64.8934	57.3573	-0.0247956	5.95189	0.00876116	0.925426	0.978075	Usp8
35.0235	35.973	35.0788	30.4312	28.8711	30.4684	0.240585	5.02509	13.9795	0.000184819	0.000343572		12.7696	7.2271	17.6735	10.721	0.513519	3.6262	1.84232	0.174679	0.471477	Vangl2
95.1334	100.739	97.3631	122.977	123.368	123.469	-0.334889	6.79501	56.4208	5.85e-14	1.86e-13		341.382	479.838	180.542	296.301	-0.784708	8.34303	4.41878	0.0355455	0.159292	Vps26a
82.5555	78.0601	83.0223	71.4778	72.0473	71.4089	0.18098	6.25442	13.3502	0.000258394	0.000473761		107.409	134.77	98.609	130.26	-0.082441	6.88197	0.0760028	0.782789	0.929818	Vps29
180.955	186.406	190.86	222.98	215.829	224.898	-0.249782	7.6733	33.1493	8.53e-09	2.15e-08		727.663	784.598	442.653	479.899	-0.713034	9.25014	3.89694	0.0483742	0.198781	Vps35
455.376	425.42	447.589	230.057	227.993	227.491	0.954415	8.38546	465.237	3.49e-103	4.17e-102		13.0786	15.981	29.5465	35.9153	1.16839	4.57141	15.8049	7.02e-05	0.000957051	Wls
1.32033	1.35077	1.05447	0	0.156625	0.099733	3.72819	-0.514489	51.7825	6.2e-13	1.9e-12		0.514904	0.20358	2.90027	3.2163	3.04069	0.913624	28.5994	8.9e-08	2.6e-06	Wnt10a		DEG
29.0473	38.4613	36.9066	0.489947	0.887539	0.548532	5.74257	4.01384	959.306	1.26e-210	2.99e-209		2.47154	2.95191	1.99393	1.0721	-0.770952	1.24254	2.77771	0.0955848	0.321832	Wnt11
6.60166	5.54525	5.76446	0.435509	0.365457	0.398932	3.87724	1.54973	233.119	1.24e-52	8.85e-52		0.720866	0.20358	2.9909	3.88636	2.85044	1.07671	26.0379	3.35e-07	8.5e-06	Wnt4		DEG
153.02	196.288	190.016	27.8725	32.3691	30.6679	2.56769	6.67989	848.68	1.41e-186	2.96e-185		2.1626	2.13759	5.34736	3.88636	1.11303	1.84932	7.52772	0.00607569	0.0409469	Wnt5a		DEG
100.762	97.0419	94.5512	190.154	196.825	186.052	-0.970658	7.18572	426.561	9.11e-95	1.02e-93		10.813	12.2148	17.5829	24.2562	0.85526	4.03204	7.53799	0.00604115	0.0407711	Wnt5b
125.362	136.214	139.05	270.015	284.9	268.581	-1.03957	7.6832	430.844	1.06e-95	1.21e-94		17.1978	13.1309	9.69776	6.4326	-0.89679	3.57003	6.83879	0.00891992	0.0551491	Wnt7b
43.015	45.4995	46.3266	54.7652	57.4812	52.8585	-0.291925	5.65512	23.7096	1.12e-06	2.47e-06		0.823847	0.30537	3.2628	3.08229	2.46928	1.04139	21.8341	2.97e-06	5.91e-05	Wnt9a
135.577	152.566	149.454	142.52	148.95	147.405	-0.00450604	7.19183	0.0078514	0.929393	0.943169		100.2	105.658	108.579	107.612	0.0706732	6.72412	0.0691931	0.792515	0.932602	Xiap
88.3233	96.8286	91.6689	79.2626	81.2882	79.8862	0.203016	6.42768	16.2745	5.48e-05	0.000106698		688.53	873.563	817.24	1010.19	0.226276	9.72716	0.350157	0.554025	0.827746	Xpo1
178.731	179.723	173.918	204.036	202.463	208.193	-0.207521	7.58187	24.5205	7.35e-07	1.64e-06		77.2357	73.4924	59.1835	49.9866	-0.463818	6.02719	3.12709	0.077001	0.276914	Ywhaz
24.3219	21.4701	21.3707	23.5719	24.5901	25.1327	-0.126275	4.56228	2.50175	0.11372	0.147863		22.7588	20.5616	18.9424	16.8856	-0.271233	4.32313	0.900829	0.342559	0.677553	Znrf3

## Sheet: STable 9 (Fig4B)
Comparison of ZFP281 targets in EL (ChIPseq data) and primed mEpiSCs per category: cell cycle arrest, EMT, Wnt and FGF signaling. Venn diagrams on Figure 4B.
EMT_EL	FGF_EL	Wnt_EL	CellCycle_EL		EMT_Primed	FGF_Primed	Wnt_Primed	CellCycle_Primed		Overlap:	EMT (60)	FGF (24)	Wnt (83)	CellCycle (79)
ACTA2	BRAF	AGO2	ABL1		AREG	BRAF	AGO1	AKT2			BDNF	BRAF	AGO2	AKT2
BDNF	CBL	AKT2	AKT2		BASP1	CBL	AGO2	APBB1			BMP1	CBL	AKT2	APBB1
BGN	ESRP1	AP2M1	APBB1		BDNF	ESRP1	AKT1	APC			CADM1	ESRP1	APC	APC
BMP1	ESRP2	APC	APC		BMP1	FGF17	AKT2	ARID3A			CAPG	FGF9	AXIN2	ARID3A
CADM1	FGF10	AXIN2	ARID3A		CADM1	FGF18	APC	BIN1			CDH11	FGFR1	BCL9	BIN1
CALD1	FGF2	BCL9	BIN1		CAPG	FGF4	ARRB2	CALR			CDH2	FRS2	BCL9L	CARM1
CAPG	FGF9	BCL9L	CARM1		CDH11	FGF6	AXIN2	CARM1			COL12A1	GAB1	CLTC	CASP2
CD44	FGFR1	CALM1	CASP2		CDH2	FGF9	BCL9	CASP2			COL1A1	GRB2	CREBBP	CCND1
CDH11	FLRT2	CLTC	CCND1		CDH6	FGFR1	BCL9L	CCNB1			COL3A1	HNRNPF	CSNK1E	CDC14A
CDH2	FRS2	CREBBP	CCNK		COL12A1	FRS2	BTRC	CCND1			COL5A1	HNRNPH1	CSNK2A1	CDK2
COL12A1	GAB1	CSNK1A1	CDC14A		COL1A1	GAB1	CLTC	CDC14A			COL5A3	KRAS	CTBP1	CDK4
COL1A1	GRB2	CSNK1E	CDK2		COL3A1	GRB2	CREBBP	CDC14B			COL6A2	NRAS	CTBP2	CDK5
COL1A2	HNRNPF	CSNK2A1	CDK4		COL5A1	HNRNPF	CSNK1E	CDK2			CRLF1	PIK3R1	CTNNB1	CDK6
COL3A1	HNRNPH1	CTBP1	CDK5		COL5A3	HNRNPH1	CSNK2A1	CDK4			ENO2	POLR2A	CUL1	CDK9
COL5A1	KRAS	CTBP2	CDK6		COL6A2	KRAS	CTBP1	CDK5			FAS	PPP2CA	CUL3	CDKN1A
COL5A3	NRAS	CTNNB1	CDK9		CRLF1	NRAS	CTBP2	CDK6			FBN2	PPP2R1A	CXXC4	CDKN1C
COL6A2	PIK3R1	CUL1	CDKN1A		CTHRC1	PIK3R1	CTNNB1	CDK9			FERMT2	SHC1	EP300	CDKN2A
COL6A3	POLR2A	CUL3	CDKN1B		CXCL12	POLR2A	CUL1	CDKN1A			FSTL1	SPRED1	FRAT2	CDKN2B
CRLF1	PPP2CA	CXXC4	CDKN1C		DAB2	PPP2CA	CUL3	CDKN1C			GADD45B	SPRED2	FZD2	CDKN2D
CXCL1	PPP2R1A	EP300	CDKN2A		DPYSL3	PPP2R1A	CXXC4	CDKN2A			GAS1	SPRY2	FZD4	CNOT6
DCN	SHC1	FRAT2	CDKN2B		DST	PTBP1	DKK2	CDKN2B			GJA1	SRC	FZD7	CNOT6L
EFEMP2	SOS1	FZD2	CDKN2C		ECM1	RBFOX2	DVL3	CDKN2D			GPC1	TIAL1	GNAO1	CNOT7
ELN	SPRED1	FZD4	CDKN2D		EDIL3	SHC1	EP300	CNOT6			ID2	UBB	GNB1	CRLF3
ENO2	SPRED2	FZD7	CNOT6		ENO2	SPRED1	FRAT2	CNOT6L			IGFBP4	UBC	GNB5	CUL1
FAS	SPRY2	GNAO1	CNOT6L		FAS	SPRED2	FZD2	CNOT7			ITGA5		GNG13	CUL3
FBN1	SRC	GNB1	CNOT7		FBN2	SPRY2	FZD4	CNOT8			ITGAV		GNGT2	DAB2IP
FBN2	TIA1	GNB2	CRLF3		FERMT2	SRC	FZD5	CRLF3			ITGB1		H2AFZ	DDIT3
FERMT2	TIAL1	GNB5	CUL1		FLNA	TIAL1	FZD7	CUL1			ITGB5		H3F3A	DUSP1
FGF2	UBB	GNG13	CUL3		FSTL1	UBB	GNAO1	CUL3			JUN		HDAC1	E2F1
FSTL1	UBC	GNG5	DAB2IP		GADD45B	UBC	GNB1	DAB2IP			LGALS1		HIST1H4B	E2F7
FSTL3		GNGT2	DDIT3		GAS1		GNB5	DDIT3			LRP1		HIST1H4I	E2F8
GADD45B		H2AFZ	DUSP1		GJA1		GNG13	DHCR24			LRRC15		HIST1H4J	EP300
GAS1		H3F3A	E2F1		GPC1		GNG3	DUSP1			MMP14		HIST1H4K	GAS1
GJA1		H3F3B	E2F7		ID2		GNGT2	E2F1			MSX1		KAT5	GAS2L1
GPC1		HDAC1	E2F8		IGFBP2		GSK3B	E2F7			MYL9		KMT2D	HBP1
GPX7		HIST1H4B	EIF4G2		IGFBP3		H2AFZ	E2F8			NOTCH2		LEF1	HMGA2
ID2		HIST1H4I	EP300		IGFBP4		H3F3A	EP300			PCOLCE		LEO1	HMGN5
IGFBP4		HIST1H4J	FGF10		ITGA5		HDAC1	FOXO4			PDGFRB		LRP5	HSP90AB1
IL6		HIST1H4K	GAS1		ITGAV		HIST1H2BB	FZD9			PDLIM4		LRP6	ID2
ITGA5		KAT5	GAS2		ITGB1		HIST1H2BE	GAS1			PFN2		MOV10	ILK
ITGAV		KMT2D	GAS2L1		ITGB5		HIST1H4A	GAS2L1			PLAUR		MYC	JMY
ITGB1		LEF1	HBP1		JUN		HIST1H4B	GATA6			QSOX1		NFATC1	KAT2B
ITGB5		LEO1	HMGA2		LAMC2		HIST1H4D	HBP1			RHOB		PFN1	KHDRBS1
JUN		LRP5	HMGN5		LGALS1		HIST1H4I	HMGA2			SAT1		PLCB1	LAMTOR1
LGALS1		LRP6	HSP90AB1		LOXL1		HIST1H4J	HMGN5			SDC1		PPP2CA	MAGI2
LOX		MOV10	ID2		LRP1		HIST1H4K	HSP90AB1			SDC4		PPP2R1A	MAPK12
LRP1		MYC	ILK		LRRC15		ITPR3	ID2			SERPINE1		PPP2R1B	MDM2
LRRC15		NFATC1	IRF1		MAGEE1		KAT5	IL12A			SERPINH1		PPP2R5B	MDM4
MMP14		PFN1	JMY		MMP14		KMT2D	ILK			SLC6A8		PPP2R5C	MIF
MMP2		PLCB1	KAT2B		MSX1		KREMEN2	INHA			SNAI2		PPP3CA	MLXIPL
MSX1		PPP2CA	KHDRBS1		MYL9		LEF1	INSM1			SPARC		PRKG1	MYC
MYL9		PPP2R1A	LAMTOR1		NID2		LEO1	JMY			TGFBR3		PSMB8	NBN
NOTCH2		PPP2R1B	MAGI2		NOTCH2		LGR4	KAT2B			THBS1		PSMC1	NOTCH2
PCOLCE		PPP2R5B	MAPK12		PCOLCE		LGR5	KHDRBS1			TNFRSF12A		RAC1	PCBP4
PCOLCE2		PPP2R5C	MDM2		PDGFRB		LRP5	KIF20B			TPM2		ROR1	PPM1A
PDGFRB		PPP2R5E	MDM4		PDLIM4		LRP6	LAMTOR1			TPM4		RSPO3	PPP1R15A
PDLIM4		PPP3CA	MIF		PFN2		MOV10	MAGI2			VCAN		SMARCA4	PPP1R9B
PFN2		PRKG1	MLXIPL		PLAUR		MYC	MAPK12			VEGFA		SMURF1	PPP2R5B
PLAUR		PSMB8	MYC		QSOX1		NFATC1	MDM2			VIM		SOX4	PRKAA1
PMP22		PSMC1	NBN		RHOB		PFN1	MDM4			WNT5A		SOX9	PRKACA
PTX3		PSME2	NOTCH2		SAT1		PLCB1	MIF					TCF4	PRKAG2
QSOX1		PYGO1	PCBP4		SDC1		PLCB3	MLXIPL					TCF7L1	PRMT1
RHOB		RAC1	PPM1A		SDC4		PPP2CA	MUC1					TCF7L2	RHEB
SAT1		RHOA	PPP1R15A		SERPINE1		PPP2R1A	MYC					TLE3	RPTOR
SDC1		ROR1	PPP1R9B		SERPINH1		PPP2R1B	MYOG					TNKS2	RRAGD
SDC4		RSPO3	PPP2R5B		SLC6A8		PPP2R5B	NBN					TNRC6A	SDE2
SERPINE1		RSPO4	PRKAA1		SNAI2		PPP2R5C	NOTCH2					TNRC6B	SKIL
SERPINH1		SMARCA4	PRKACA		SPARC		PPP3CA	PCBP4					TNRC6C	SLC25A33
SLC6A8		SMURF1	PRKAG2		TGFBR3		PRKCA	PLK3					UBB	SMAD3
SLIT3		SMURF2	PRMT1		THBS1		PRKG1	PPM1A					UBC	SOX4
SNAI2		SNX3	RASSF1		THY1		PSMA6	PPM1G					USP34	TCF7L2
SPARC		SOX4	RHEB		TIMP3		PSMB8	PPP1R15A					VANGL2	TFAP4
TGFB1		SOX9	RPTOR		TNFRSF12A		PSMC1	PPP1R9B					VPS26A	TFDP2
TGFBR3		TCF4	RRAGC		TPM2		PSMC2	PPP2R5B					WLS	TGFBR1
THBS1		TCF7L1	RRAGD		TPM4		PSMC4	PRKAA1					WNT10A	THBS1
TIMP1		TCF7L2	SDE2		VCAN		PSMD8	PRKACA					WNT2B	TNKS1BP1
TNFAIP3		TLE2	SKIL		VEGFA		PYGO2	PRKAG2					WNT5A	WDR6
TNFRSF12A		TLE3	SLC25A33		VIM		RAC1	PRMT1					WNT5B	ZBTB17
TPM2		TLE4	SMAD3		WNT5A		RBX1	RHEB					WNT8A	ZFHX3
TPM4		TNKS2	SOX4				ROR1	RPRM					WNT9A
VCAN		TNRC6A	TCF7L2				RSPO3	RPTOR					XPO1
VEGFA		TNRC6B	TFAP4				SCRIB	RRAGD					YWHAZ
VEGFC		TNRC6C	TFDP2				SMARCA4	SDE2					ZNRF3
VIM		UBB	TGFB1				SMURF1	SFN
WIPF1		UBC	TGFBR1				SOST	SGSM3
WNT5A		USP34	THBS1				SOX17	SKIL
		VANGL2	TNKS1BP1				SOX2	SLC25A33
		VPS26A	UHRF2				SOX3	SMAD3
		WLS	WDR6				SOX4	SOX2
		WNT10A	WNT10B				SOX9	SOX4
		WNT10B	ZBTB17				TCF4	TCF7L2
		WNT2B	ZFHX3				TCF7L1	TFAP4
		WNT5A					TCF7L2	TFDP2
		WNT5B					TLE3	TGFBR1
		WNT8A					TNKS	THBS1
		WNT9A					TNKS2	TNKS1BP1
		XPO1					TNRC6A	TRIAP1
		YWHAZ					TNRC6B	WDR6
		ZNRF3					TNRC6C	ZBTB17
							UBB	ZFHX3
							UBC
							USP34
							VANGL2
							VPS26A
							WLS
							WNT10A
							WNT16
							WNT2B
							WNT3
							WNT5A
							WNT5B
							WNT6
							WNT7B
							WNT8A
							WNT9A
							XPO1
							YWHAZ
							ZNRF3

## Sheet: STable 10 (FigS4A)
Gene lists of DEG in RNAseq and ChIP seq data from EL/PT cells. Heatmap on Figure S4A.
504 common elements in "Exp_EL_high" and "Bind_EL_high":	41 common elements in "Exp_PT_high" and "Bind_EL_high":	63 common elements in "Exp_EL_high" and "Bind_PT_high":	118 common elements in "Exp_PT_high" and "Bind_PT_high":
Ppp1r16b	Fbxl4	Krt5	Kdf1
Nrn1	Aes	Tnr	Josd2
Tmem132c	9930012K11Rik	She	Sytl3
Mrap	Rffl	Reg1	Cd46
Sgip1	Prpf40b	Thbs2	Map1lc3a
Tbx5	Phf8	Grem2	Gal3st1
Xpnpep2	Hook2	Frzb	Rnf128
Kcnt2	Kat2b	Epha3	Pick1
Cilp	Rasgef1a	Dpp6	Oas1b
Clec14a	Rnf145	Fam131b	Fzd5
Dok5	Cdkn2a	Gm9767	Ccdc65
2810433D01Rik	Efna5	Fap	Tmtc2
Col3a1	Iffo2	Prokr2	Nhsl1
Nnmt	Mgst1	Gjc1	Serpinb5
Ccr7	Nfkbia	Pde1a	Elovl7
Nos1	Gm20939	Ptgs2os2	Ctnnd1
Unc45b	Iqcd	Rapgef4	Gdf5
Twist2	Gadd45b	Apln	Mir3074-1
Usp13	Dhrs3	Ly6d	Slc8b1
Podn	Fas	Gbx1	Dsg2
Dcn	Btbd11	Fgl2	Fhdc1
Tnfaip6	Bmf	Osbp2	4930422M22Rik
Ms4a4d	Rap1gap	Zfp366	Nes
Col6a1	Sytl1	Agmo	Limch1
Fgf10	Gfra2	Dynap	Shank2
Hoxb7	Nme5	Gm10432	Scml2
Adgrd1	Mturn	Ttc7b	AI661453
Hoxc4	Lrrc25	Sema6d	Epcam
Slit3	Ccr5	Raet1e	Them5
Mrgprf	Il21r	Kcns1	Zfhx2os
Ccdc8	Bex3	Pir	9530052E02Rik
Col5a1	Csrp1	Spp1	Mok
Ccdc3	2310001H17Rik	Kcnj8	Nipsnap1
Zfhx4	Zfp462	Ap1s2	Kcnn2
Efemp1	Ccrl2	Mall	Nectin4
Islr	Itgb6	Ggcx	Spns2
Col1a1	Chn1os3	Lypd1	C2cd4d
Mfap5	Rragd	Cbr3	Cobl
Medag	Esrrg	Slc12a5	Zscan18
Rtn4rl2	Htr1d	Epdr1	Tubb2a-ps2
Ebf1	4930486L24Rik	Dio2	Irx1
Fstl1		Trpc1	Kank1
Msc		Zfp300	Lrrc8d
Col1a2		Aspm	Cp
Sulf1		Apaf1	Shroom3
Nid1		Clcn5	Map3k21
Filip1		Tnfsf10	Ikzf1
Peg12		Ssr3	Dll1
Tshz3		Kcnq1	Capn12
Shank3		Prokr1	Sox10
Rcn3		Tnnt2	Pak3
Htr2a		Tmed3	Slc25a48
Nhsl2		Tgm5	Retreg1
Loxl1		Syt8	Dock3
Podnl1		Erfe	Marveld3
Bgn		Iigp1	B3galt5
Npy1r		Yipf5	Spint1
Il33		Pde4dip	Aldoc
Angpt4		Mkx	Gm16907
Cthrc1		Mcmdc2	Gm10863
Stmn4		Ttpal	Dcstamp
Hoxb4		Tor3a	Gm10791
Slc2a3		Filip1l	9330188P03Rik
Fgd5			Prss8
En1			Tfap2c
Sema7a			N4bp2l1
Fbln2			Hhipl2
Mrc2			Dact2
Mmp2			Cd24a
Pdgfrb			Ildr1
Twist1			Kcnn4
Mfap4			Sh2d4a
Spon1			Rassf4
Dpep1			Golga7b
Kbtbd11			Sdcbp2
Tbx15			Pinc
Hhipl1			Ltbp2
Has2os			4833427F10Rik
Alx4			9130230L23Rik
Chsy3			Rasal1
Tspan11			Hlf
Igfbp6			Kcnk1
Cd248			Sdc4
Zfp804a			Krt18
Fmo1			Btn1a1
Lsp1			Unc13d
Cygb			Scd1
Gxylt2			Nap1l3
Pde10a			Klhl38
Adgra2			Tuft1
Ccdc80			Psapl1
Dpt			Cldn3
Slit2			Mmp15
Emx2			Klk6
Tbx3			Tacstd2
Ctsk			Tmem30b
Hoxb3			Plet1
Sema5b			Csn3
Clip3			Zdhhc23
Gimap6			Scnn1b
Fkbp10			Slc25a18
Adam19			Nyx
Meox1			Zfp641
Cnrip1			Gca
Dzip1l			Sorbs1
Gypc			Rdh12
Plat			Krt9
Nid2			Kcnj10
Gdf6			Vipr1
Igfbp4			Kcnk5
Col4a2			Sorbs2
Wnt11			Socs2
Htra3			Barx2
Gli3			S100b
Apold1			Cldn10
D430019H16Rik			Lalba
Pdgfra			Adig
Zeb1			Adrb1
Shc2
Sncb
Hoxc8
Elfn1
Prcd
Adcy4
Olfml2b
Nxph4
Gng8
Fam78b
Mmp23
Adamts2
Hic1
Slc43a1
Peg10
Clmp
Adamts12
Pi16
Meis2
Emilin1
Vstm4
Il27ra
Aebp1
Gata6
Snai2
Iglon5
Angptl8
Papss2
Serpina3n
Slc16a3
Kcnd1
Xkr6
Cacna2d1
D030045P18Rik
Tmem119
Ptprb
Hspb8
Il6
Adora2b
Nr2f1
Adamts6
Adamts4
Rnf182
Pde3a
Myh11
Olfml3
Flrt2
Map1a
Mmp27
Clic5
Rtl8c
Larp6
Hoxc5
Otud7a
Esam
Serpina3i
Plscr4
Lhx8
Vegfc
Gpx3
P4ha1
Slc1a3
Mgat3
Pcdh7
F2rl3
Lrrc32
Kif26a
Ppp1r3d
Apcdd1
Slc9b2
Nfatc4
Add2
Dram1
Ildr2
Colec12
B130024G19Rik
Cdc42ep2
Snai1
Gata2
Tmem59l
Snx24
Pla2g2d
Rgs3
Ism1
Exoc3l4
Adcy5
Kdelr3
Ppp1r3b
Adh1
Apba1
Pianp
Trerf1
Gpr153
S1pr3
Mxra8
Aqp1
Hspg2
Axl
Mical1
Zfp275
Tbx2
Mst1r
Timp3
Cmklr1
Dact3
Efemp2
Gpm6b
A4galt
Nxpe4
Vim
Nrp1
Gabrb1
Agpat4
Epb41l3
Rasl11b
Galnt16
Klf15
Cdr2l
Maf
Jag1
Egr2
Stc1
Tnfsf9
Fam189b
Lpl
Gria3
Numbl
Adcy7
Egfl7
Lipg
Ocstamp
B4galt5
Fxyd5
Mcoln2
Gdf11
Scn2b
C1qtnf1
Cavin1
AA414768
Wnt16
Ptch2
St3gal2
Ly6a
Igdcc4
Gsdmd
Phyhip
Tmem26
Emilin2
Trim35
Apbb1ip
Tmem95
Ngfr
Lncenc1
Glipr2
Klf2
Gas1
Hoxa4
Xylt1
Sh3rf3
Ucn2
Sept4
Angptl4
Cavin3
Ugcg
Crip1
Neurl1a
Apol7d
Emp1
Susd2
Rarres2
Fam167b
Rnf150
Bdnf
Eml1
Meis1
Tmeff1
Msi1
Ch25h
Marveld1
Thpo
Palm
Tcf4
Gucy1a2
A330009N23Rik
Fam43a
Pkdcc
Serpinh1
Zeb2os
Lrp2bp
Lhfpl2
Htra1
Lamb1
Slfn5
H6pd
Pde8a
Socs3
Scn1b
Chsy1
Nynrin
Plpp3
Pros1
9530026P05Rik
3110039I08Rik
Mex3b
Syt6
Celsr3
Lifr
Mt2
Med12l
Fam13c
Rpp25
Fam111a
Bmp2
Col16a1
Hspa12b
Il1rl2
Mdfic
Nrp2
Kif26b
Ptp4a3
Igsf9b
Pde3b
Sema3b
Pde4a
Ccl2
Calhm2
Zfp948
Axin2
Kif14
Adgrl1
Tenm4
Cachd1
Ppp1r18
Sdc2
Rin3
Cpt1c
Sdc1
Il17ra
Slc1a5
Mcub
Fat4
Tmem159
Sh3pxd2b
Tmem198b
Cblb
Rab3il1
Ptgir
Ctsc
Rhoj
Cst3
Lgals3bp
Adamts10
Hlx
Tiparp
Sphk1
Plk1
Pappa
Nudt6
Neurl1b
Cfap157
Spc24
Mcam
Cdkn2d
Batf
9130024F11Rik
Phospho1
Vgll3
Ero1l
Slc41a3
Atp1a3
Tns2
Il4ra
Parvb
Rmdn2
Adprh
Flnc
Tubb6
Chst12
Sept9
Cfap45
Adamts7
Hspb7
Rcor2
Ugt1a7c
Arntl
Nfil3
Ahi1
Fscn1
BC030867
Lhfp
Nr2f2
Mn1
Lgals1
Mir130c
Adpgk
Nyap1
St3gal4
Plod2
Magi2
Gngt2
Gpr162
Zfp703
Arhgap29
Arhgef40
Pacsin1
Il11ra1
Mif
Vasn
Itgb5
Ssh2
H1fx
Ext1
Cdkn2c
Icam1
Man2a2
Tm6sf1
Fstl3
Snhg12
Acvrl1
Tgif2
Glis2
Entpd2
Hic2
Aars
Itgav
1700012B07Rik
Dysf
Marcks
Frmd4a
Tgfbr1
Hmox1
Cela1
Sox12
Wasf1
Vcam1
Gja1
Eml4
Mafb
Mettl24
Reck
Gabbr1
Mrpl52
Sept8
Plcl2
Tmsb10
Tsc22d3
Slc16a9
C1rl
Rhbdl3
Kctd17
Itpripl2
Tpbg
Cd63
Spred2
Rai2
Lrrc8c
Ece1
Fzd2
Sigmar1
Pkd1
Eva1b
Ctsb
Pkm
Lrig3
Enc1
Tnfrsf1a
Hsd11b2
Plekhg1
Shmt2
C630043F03Rik
Cmip
Tsc22d1
Ppfibp1
Hmga1b
Krtcap2
Slc44a2
Slc43a3
Slc6a9
Klf4
Eif4ebp1
Gsn
Steap3
Nat14
Phyhd1
Tpi1
Ssbp2

[truncated: 3 more sheets: STable 11 (Fig4D-E), STable 12, STable 13]
